# Supplementary material for: Profiling of Selected MicroRNAs in Proliferative Eutopic Endometrium of Women with Ovarian Endometriosis
Source: Biomed Res Int. 2015 Aug 20;2015:760698. doi: 10.1155/2015/760698 (PMC4558423; doi:10.1155/2015/760698)
Supplement: Supplementary file 1 — Table I: The names of miRNAs significantly differentially expressed between eutopic endometrium of patients with endometriosis vs eutopic endometrium of patients without endometriosis. Table II: The associations between miRNA and mRNA, which presents detailed results of the search of six major databases i.e targetscan, tarbase, miranda, mirbase, mirtarget2 and pictar. [file 760698.f1.zip › 760698.f1/Table II/hsa-miR-1323.tsv]

miR	targetscan	tarbase	miranda	mirbase	mirtarget2	pictar	GeneSymbol	GeneName
hsa-miR-1323	1	0	1	1	1	1	ZFYVE16	zinc finger, FYVE domain containing 16
hsa-miR-1323	1	0	1	1	1	1	FAM65B	family with sequence similarity 65, member B
hsa-miR-1323	1	0	1	1	1	1	SGSM2	small G protein signaling modulator 2
hsa-miR-1323	1	0	1	0	1	1	KIAA0408	KIAA0408
hsa-miR-1323	0	0	1	1	0	0	PLCH2	phospholipase C, eta 2
hsa-miR-1323	1	0	1	1	1	1	CDC42BPA	CDC42 binding protein kinase alpha (DMPK-like)
hsa-miR-1323	1	0	1	1	0	0	OTUD3	OTU domain containing 3
hsa-miR-1323	1	0	1	1	0	0	DENND4B	DENN/MADD domain containing 4B
hsa-miR-1323	0	0	1	1	1	1	NEU3	sialidase 3 (membrane sialidase)
hsa-miR-1323	1	0	1	1	1	1	RNGTT	RNA guanylyltransferase and 5'-phosphatase
hsa-miR-1323	0	0	1	1	0	0	ZNF862	zinc finger protein 862
hsa-miR-1323	1	0	1	1	1	1	GPATCH8	G patch domain containing 8
hsa-miR-1323	1	0	1	1	0	0	PCLO	piccolo (presynaptic cytomatrix protein)
hsa-miR-1323	1	0	1	0	1	1	MFAP3L	microfibrillar-associated protein 3-like
hsa-miR-1323	1	0	1	1	1	1	HIPK1	homeodomain interacting protein kinase 1
hsa-miR-1323	0	0	1	1	1	1	DZIP3	DAZ interacting protein 3, zinc finger
hsa-miR-1323	0	0	1	1	0	0	PAN2	PAN2 poly(A) specific ribonuclease subunit homolog (S. cerevisiae)
hsa-miR-1323	1	0	1	0	1	1	DOCK4	dedicator of cytokinesis 4
hsa-miR-1323	1	0	1	1	1	1	MATR3	matrin 3
hsa-miR-1323	1	0	1	1	0	0	ESYT1	extended synaptotagmin-like protein 1
hsa-miR-1323	1	0	1	1	1	1	DNM3	dynamin 3
hsa-miR-1323	1	0	1	0	1	1	ATG14	autophagy related 14
hsa-miR-1323	1	0	1	1	1	1	WWC1	WW and C2 domain containing 1
hsa-miR-1323	0	0	1	1	0	0	FAM169A	family with sequence similarity 169, member A
hsa-miR-1323	0	0	1	1	1	1	WDR47	WD repeat domain 47
hsa-miR-1323	1	0	1	1	1	1	UBE2K	ubiquitin-conjugating enzyme E2K
hsa-miR-1323	0	0	1	1	1	1	ST3GAL6	ST3 beta-galactoside alpha-2,3-sialyltransferase 6
hsa-miR-1323	1	0	1	0	0	0	KIAA0947	KIAA0947
hsa-miR-1323	1	0	1	1	1	1	CIT	citron (rho-interacting, serine/threonine kinase 21)
hsa-miR-1323	1	0	1	1	1	1	NLGN4Y	neuroligin 4, Y-linked
hsa-miR-1323	0	0	1	1	0	0	FAM149B1	family with sequence similarity 149, member B1
hsa-miR-1323	1	0	1	1	1	1	PALLD	palladin, cytoskeletal associated protein
hsa-miR-1323	1	0	1	1	1	1	RPGRIP1L	RPGRIP1-like
hsa-miR-1323	1	0	1	1	1	1	FOXJ3	forkhead box J3
hsa-miR-1323	1	0	1	1	0	0	KIAA1045	KIAA1045
hsa-miR-1323	1	0	1	1	1	1	NLGN1	neuroligin 1
hsa-miR-1323	1	0	1	0	1	1	ZNF507	zinc finger protein 507
hsa-miR-1323	1	0	1	0	1	1	ODZ2	odz, odd Oz/ten-m homolog 2 (Drosophila)
hsa-miR-1323	1	0	1	0	1	1	GPR158	G protein-coupled receptor 158
hsa-miR-1323	1	0	1	1	0	0	PPM1H	protein phosphatase, Mg2+/Mn2+ dependent, 1H
hsa-miR-1323	1	0	1	1	1	1	RIMKLB	ribosomal modification protein rimK-like family member B
hsa-miR-1323	1	0	1	1	0	0	ATAD2B	ATPase family, AAA domain containing 2B
hsa-miR-1323	1	0	1	0	1	1	INTS2	integrator complex subunit 2
hsa-miR-1323	0	0	1	1	1	1	DSCR6	Down syndrome critical region gene 6
hsa-miR-1323	1	0	1	1	0	0	SRGAP1	SLIT-ROBO Rho GTPase activating protein 1
hsa-miR-1323	1	0	1	1	1	1	LRRC7	leucine rich repeat containing 7
hsa-miR-1323	1	0	1	1	0	0	EBF4	early B-cell factor 4
hsa-miR-1323	0	0	1	0	1	1	KIAA1468	KIAA1468
hsa-miR-1323	1	0	1	0	1	1	LMO3	LIM domain only 3 (rhombotin-like 2)
hsa-miR-1323	1	0	1	1	1	1	TOPORS	topoisomerase I binding, arginine/serine-rich, E3 ubiquitin protein ligase
hsa-miR-1323	1	0	1	1	1	1	PPP6R3	protein phosphatase 6, regulatory subunit 3
hsa-miR-1323	0	0	1	0	1	1	ZSWIM6	zinc finger, SWIM-type containing 6
hsa-miR-1323	1	0	1	0	1	1	IGDCC4	immunoglobulin superfamily, DCC subclass, member 4
hsa-miR-1323	1	0	1	0	0	0	TANC2	tetratricopeptide repeat, ankyrin repeat and coiled-coil containing 2
hsa-miR-1323	1	0	1	1	1	1	SNX3	sorting nexin 3
hsa-miR-1323	0	0	1	1	1	1	PBLD	phenazine biosynthesis-like protein domain containing
hsa-miR-1323	1	0	1	1	0	0	ARHGAP39	Rho GTPase activating protein 39
hsa-miR-1323	1	0	1	1	1	1	IKZF4	IKAROS family zinc finger 4 (Eos)
hsa-miR-1323	0	0	1	1	0	0	FOCAD	focadhesin
hsa-miR-1323	1	0	1	1	0	0	ZNF527	zinc finger protein 527
hsa-miR-1323	0	0	1	1	1	1	SLC11A2	solute carrier family 11 (proton-coupled divalent metal ion transporters), member 2
hsa-miR-1323	1	0	1	1	1	1	NAV2	neuron navigator 2
hsa-miR-1323	0	0	1	1	1	1	C3orf15	chromosome 3 open reading frame 15
hsa-miR-1323	1	0	1	1	1	1	HNRPDL	heterogeneous nuclear ribonucleoprotein D-like
hsa-miR-1323	0	0	1	1	0	0	SEC16B	SEC16 homolog B (S. cerevisiae)
hsa-miR-1323	1	0	1	1	1	1	MAT2B	methionine adenosyltransferase II, beta
hsa-miR-1323	1	0	1	1	1	1	POGZ	pogo transposable element with ZNF domain
hsa-miR-1323	1	0	1	1	1	1	TET2	tet methylcytosine dioxygenase 2
hsa-miR-1323	1	0	1	1	1	1	OXR1	oxidation resistance 1
hsa-miR-1323	1	0	1	1	0	0	ZNF292	zinc finger protein 292
hsa-miR-1323	1	0	1	1	1	1	SH3TC2	SH3 domain and tetratricopeptide repeats 2
hsa-miR-1323	0	0	1	1	0	0	CIRH1A	cirrhosis, autosomal recessive 1A (cirhin)
hsa-miR-1323	1	0	1	0	1	1	RNF43	ring finger protein 43
hsa-miR-1323	1	0	1	0	0	0	RNF169	ring finger protein 169
hsa-miR-1323	1	0	1	1	1	1	ACBD5	acyl-CoA binding domain containing 5
hsa-miR-1323	1	0	1	1	1	1	RFX4	regulatory factor X, 4 (influences HLA class II expression)
hsa-miR-1323	1	0	1	1	1	1	SMEK1	SMEK homolog 1, suppressor of mek1 (Dictyostelium)
hsa-miR-1323	1	0	1	0	0	0	ZC3H12C	zinc finger CCCH-type containing 12C
hsa-miR-1323	0	0	1	1	1	1	ACPP	acid phosphatase, prostate
hsa-miR-1323	0	0	1	1	0	0	DDB2	damage-specific DNA binding protein 2, 48kDa
hsa-miR-1323	1	0	1	1	1	1	PAN3	PAN3 poly(A) specific ribonuclease subunit homolog (S. cerevisiae)
hsa-miR-1323	1	0	1	0	1	1	LIN54	lin-54 homolog (C. elegans)
hsa-miR-1323	1	0	1	1	1	1	KCNMA1	potassium large conductance calcium-activated channel, subfamily M, alpha member 1
hsa-miR-1323	1	0	1	1	1	1	SLC43A2	solute carrier family 43, member 2
hsa-miR-1323	1	0	1	0	1	1	BEND4	BEN domain containing 4
hsa-miR-1323	1	0	1	1	1	1	NRXN2	neurexin 2
hsa-miR-1323	1	0	1	1	1	1	TRIM36	tripartite motif containing 36
hsa-miR-1323	1	0	1	0	1	1	CCDC88A	coiled-coil domain containing 88A
hsa-miR-1323	1	0	1	1	1	1	COL11A1	collagen, type XI, alpha 1
hsa-miR-1323	0	0	1	0	1	1	ITPR1	inositol 1,4,5-trisphosphate receptor, type 1
hsa-miR-1323	1	0	1	1	1	1	DAPK1	death-associated protein kinase 1
hsa-miR-1323	1	0	1	1	1	1	BACH2	BTB and CNC homology 1, basic leucine zipper transcription factor 2
hsa-miR-1323	1	0	1	0	1	1	PCDHA13	protocadherin alpha 13
hsa-miR-1323	1	0	1	1	1	1	PCDHA4	protocadherin alpha 4
hsa-miR-1323	0	0	1	1	0	0	KCNC3	potassium voltage-gated channel, Shaw-related subfamily, member 3
hsa-miR-1323	1	0	1	1	1	1	SLC8A1	solute carrier family 8 (sodium/calcium exchanger), member 1
hsa-miR-1323	1	0	1	0	1	1	PLAG1	pleiomorphic adenoma gene 1
hsa-miR-1323	1	0	1	1	0	0	TSPYL2	TSPY-like 2
hsa-miR-1323	1	0	1	1	1	1	FMR1	fragile X mental retardation 1
hsa-miR-1323	1	0	1	1	1	1	PRKACB	protein kinase, cAMP-dependent, catalytic, beta
hsa-miR-1323	0	0	1	1	0	0	PPM1G	protein phosphatase, Mg2+/Mn2+ dependent, 1G
hsa-miR-1323	1	0	1	0	1	1	ETV1	ets variant 1
hsa-miR-1323	0	0	1	0	1	1	NPY1R	neuropeptide Y receptor Y1
hsa-miR-1323	0	0	1	1	1	1	TFRC	transferrin receptor (p90, CD71)
hsa-miR-1323	1	0	1	1	1	1	REV3L	REV3-like, polymerase (DNA directed), zeta, catalytic subunit
hsa-miR-1323	1	0	1	1	1	1	ABI1	abl-interactor 1
hsa-miR-1323	1	0	1	0	1	1	CHL1	cell adhesion molecule with homology to L1CAM (close homolog of L1)
hsa-miR-1323	0	0	1	1	1	1	DGKE	diacylglycerol kinase, epsilon 64kDa
hsa-miR-1323	0	0	1	1	1	1	GTF2IRD1	GTF2I repeat domain containing 1
hsa-miR-1323	1	0	1	1	1	1	ANK1	ankyrin 1, erythrocytic
hsa-miR-1323	0	0	1	1	1	1	RYR1	ryanodine receptor 1 (skeletal)
hsa-miR-1323	0	0	1	1	1	1	GPM6B	glycoprotein M6B
hsa-miR-1323	1	0	1	1	1	1	PDLIM5	PDZ and LIM domain 5
hsa-miR-1323	1	0	1	1	1	1	IPO8	importin 8
hsa-miR-1323	1	0	1	0	1	1	TBL1X	transducin (beta)-like 1X-linked
hsa-miR-1323	0	0	1	1	0	0	SREBF1	sterol regulatory element binding transcription factor 1
hsa-miR-1323	1	0	1	1	1	1	EPHB4	EPH receptor B4
hsa-miR-1323	1	0	1	1	1	1	EPB41	erythrocyte membrane protein band 4.1 (elliptocytosis 1, RH-linked)
hsa-miR-1323	0	0	1	1	0	0	SLC22A8	solute carrier family 22 (organic anion transporter), member 8
hsa-miR-1323	1	0	1	1	1	1	GOLGA4	golgin A4
hsa-miR-1323	0	0	1	1	1	1	KIF3A	kinesin family member 3A
hsa-miR-1323	0	0	1	1	1	1	CHN1	chimerin (chimaerin) 1
hsa-miR-1323	0	0	1	1	1	1	ELOVL5	ELOVL fatty acid elongase 5
hsa-miR-1323	1	0	1	1	1	1	TEAD1	TEA domain family member 1 (SV40 transcriptional enhancer factor)
hsa-miR-1323	0	0	1	1	0	0	TRIM27	tripartite motif containing 27
hsa-miR-1323	1	0	1	1	1	1	PHLDB2	pleckstrin homology-like domain, family B, member 2
hsa-miR-1323	1	0	1	0	1	1	CAV1	caveolin 1, caveolae protein, 22kDa
hsa-miR-1323	1	0	1	0	1	1	PDE7B	phosphodiesterase 7B
hsa-miR-1323	1	0	1	1	1	1	MYO9B	myosin IXB
hsa-miR-1323	1	0	1	1	1	1	MEF2D	myocyte enhancer factor 2D
hsa-miR-1323	1	0	1	1	1	1	PICALM	phosphatidylinositol binding clathrin assembly protein
hsa-miR-1323	1	0	1	1	1	1	MYH10	myosin, heavy chain 10, non-muscle
hsa-miR-1323	1	0	1	0	1	1	FYB	FYN binding protein
hsa-miR-1323	1	0	1	1	1	1	PDLIM3	PDZ and LIM domain 3
hsa-miR-1323	0	0	1	0	1	1	PARG	poly (ADP-ribose) glycohydrolase
hsa-miR-1323	1	0	1	0	1	1	MLL2	myeloid/lymphoid or mixed-lineage leukemia 2
hsa-miR-1323	1	0	1	0	1	1	PDE4D	phosphodiesterase 4D, cAMP-specific
hsa-miR-1323	0	0	1	0	1	1	ZMYM2	zinc finger, MYM-type 2
hsa-miR-1323	1	0	1	1	1	1	CBFA2T2	core-binding factor, runt domain, alpha subunit 2; translocated to, 2
hsa-miR-1323	1	0	1	1	1	1	ENTPD4	ectonucleoside triphosphate diphosphohydrolase 4
hsa-miR-1323	1	0	1	1	1	1	PCDH17	protocadherin 17
hsa-miR-1323	1	0	1	1	1	1	MYT1L	myelin transcription factor 1-like
hsa-miR-1323	1	0	1	0	1	1	CELF2	CUGBP, Elav-like family member 2
hsa-miR-1323	1	0	1	1	1	1	SOCS2	suppressor of cytokine signaling 2
hsa-miR-1323	0	0	1	1	1	1	UBE4B	ubiquitination factor E4B
hsa-miR-1323	1	0	1	1	1	1	SHOC2	soc-2 suppressor of clear homolog (C. elegans)
hsa-miR-1323	1	0	1	1	1	1	MBNL2	muscleblind-like splicing regulator 2
hsa-miR-1323	0	0	1	1	1	1	TEX30	testis expressed 30
hsa-miR-1323	1	0	1	1	0	0	SLC44A2	solute carrier family 44, member 2
hsa-miR-1323	1	0	1	1	1	1	TP63	tumor protein p63
hsa-miR-1323	1	0	1	1	1	1	USP3	ubiquitin specific peptidase 3
hsa-miR-1323	1	0	1	1	1	1	AKAP9	A kinase (PRKA) anchor protein (yotiao) 9
hsa-miR-1323	0	0	1	0	0	0	LOC400590	uncharacterized LOC400590
hsa-miR-1323	0	0	1	1	1	1	SH2D1A	SH2 domain containing 1A
hsa-miR-1323	0	0	1	1	1	1	THOC7	THO complex 7 homolog (Drosophila)
hsa-miR-1323	1	0	1	0	1	1	CD164	CD164 molecule, sialomucin
hsa-miR-1323	0	0	1	1	0	0	RBM5	RNA binding motif protein 5
hsa-miR-1323	1	0	1	1	1	1	EDNRB	endothelin receptor type B
hsa-miR-1323	0	0	1	1	1	1	CSAD	cysteine sulfinic acid decarboxylase
hsa-miR-1323	0	0	1	1	1	1	ACIN1	apoptotic chromatin condensation inducer 1
hsa-miR-1323	1	0	1	0	1	1	BECN1	beclin 1, autophagy related
hsa-miR-1323	1	0	1	1	1	1	SCHIP1	schwannomin interacting protein 1
hsa-miR-1323	1	0	1	1	1	1	HMG20A	high mobility group 20A
hsa-miR-1323	1	0	1	1	1	1	MYNN	myoneurin
hsa-miR-1323	1	0	1	0	0	0	PRPF40A	PRP40 pre-mRNA processing factor 40 homolog A (S. cerevisiae)
hsa-miR-1323	0	0	1	0	1	1	PDP1	pyruvate dehyrogenase phosphatase catalytic subunit 1
hsa-miR-1323	1	0	1	1	1	1	AGPAT3	1-acylglycerol-3-phosphate O-acyltransferase 3
hsa-miR-1323	0	0	1	1	1	1	FGFR1OP2	FGFR1 oncogene partner 2
hsa-miR-1323	1	0	1	1	0	0	ZCCHC4	zinc finger, CCHC domain containing 4
hsa-miR-1323	1	0	1	1	1	1	MARK3	MAP/microtubule affinity-regulating kinase 3
hsa-miR-1323	1	0	1	0	1	1	AMOTL2	angiomotin like 2
hsa-miR-1323	0	0	1	0	0	0	BPESC1	blepharophimosis, epicanthus inversus and ptosis, candidate 1 (non-protein coding)
hsa-miR-1323	1	0	1	1	1	1	TSC22D2	TSC22 domain family, member 2
hsa-miR-1323	0	0	1	1	0	0	NCOA6	nuclear receptor coactivator 6
hsa-miR-1323	1	0	1	1	1	1	EIF4A2	eukaryotic translation initiation factor 4A2
hsa-miR-1323	0	0	1	1	1	1	CHRD	chordin
hsa-miR-1323	0	0	1	1	1	1	MFF	mitochondrial fission factor
hsa-miR-1323	1	0	1	1	1	1	C21orf91	chromosome 21 open reading frame 91
hsa-miR-1323	1	0	1	1	1	1	SNTB2	syntrophin, beta 2 (dystrophin-associated protein A1, 59kDa, basic component 2)
hsa-miR-1323	1	0	1	1	1	1	STRN3	striatin, calmodulin binding protein 3
hsa-miR-1323	0	0	1	1	1	1	CASC5	cancer susceptibility candidate 5
hsa-miR-1323	0	0	1	1	1	1	NKX3-1	NK3 homeobox 1
hsa-miR-1323	0	0	1	0	0	0	TIGD7	tigger transposable element derived 7
hsa-miR-1323	1	0	1	1	1	1	ELF2	E74-like factor 2 (ets domain transcription factor)
hsa-miR-1323	1	0	1	1	1	1	ABI2	abl-interactor 2
hsa-miR-1323	1	0	1	1	1	1	SH3GLB1	SH3-domain GRB2-like endophilin B1
hsa-miR-1323	0	0	1	0	1	1	ERBB2IP	erbb2 interacting protein
hsa-miR-1323	1	0	1	1	1	1	CALN1	calneuron 1
hsa-miR-1323	1	0	1	1	1	1	DCLRE1B	DNA cross-link repair 1B
hsa-miR-1323	1	0	1	1	1	1	CPEB1	cytoplasmic polyadenylation element binding protein 1
hsa-miR-1323	1	0	1	1	1	1	BIVM	basic, immunoglobulin-like variable motif containing
hsa-miR-1323	0	0	1	1	0	0	CTNNBL1	catenin, beta like 1
hsa-miR-1323	1	0	1	1	1	1	LARP4	La ribonucleoprotein domain family, member 4
hsa-miR-1323	0	0	1	1	0	0	CREB3L4	cAMP responsive element binding protein 3-like 4
hsa-miR-1323	0	0	1	1	1	1	OLFM3	olfactomedin 3
hsa-miR-1323	1	0	1	1	1	1	PANX2	pannexin 2
hsa-miR-1323	0	0	1	1	0	0	SNRPN	small nuclear ribonucleoprotein polypeptide N
hsa-miR-1323	0	0	1	1	1	1	SPSB1	splA/ryanodine receptor domain and SOCS box containing 1
hsa-miR-1323	1	0	1	1	1	1	RBFOX1	RNA binding protein, fox-1 homolog (C. elegans) 1
hsa-miR-1323	1	0	1	1	1	1	SGMS2	sphingomyelin synthase 2
hsa-miR-1323	1	0	1	1	1	1	ASB8	ankyrin repeat and SOCS box containing 8
hsa-miR-1323	0	0	1	1	1	1	SAMD9L	sterile alpha motif domain containing 9-like
hsa-miR-1323	0	0	1	1	1	1	AMPH	amphiphysin
hsa-miR-1323	1	0	1	0	1	1	IL1RAP	interleukin 1 receptor accessory protein
hsa-miR-1323	0	0	1	1	1	1	ANKRD36B	ankyrin repeat domain 36B
hsa-miR-1323	0	0	1	0	0	0	SNHG4	small nucleolar RNA host gene 4 (non-protein coding)
hsa-miR-1323	1	0	1	1	1	1	SUCO	SUN domain containing ossification factor
hsa-miR-1323	1	0	1	0	1	1	GRB10	growth factor receptor-bound protein 10
hsa-miR-1323	1	0	1	1	1	1	VAMP7	vesicle-associated membrane protein 7
hsa-miR-1323	1	0	1	1	1	1	PALM2	paralemmin 2
hsa-miR-1323	1	0	1	1	1	1	NRXN3	neurexin 3
hsa-miR-1323	0	0	1	1	0	0	RNASET2	ribonuclease T2
hsa-miR-1323	1	0	1	1	1	1	PNISR	PNN-interacting serine/arginine-rich protein
hsa-miR-1323	1	0	1	1	1	1	NAV3	neuron navigator 3
hsa-miR-1323	1	0	1	1	1	1	ARL4C	ADP-ribosylation factor-like 4C
hsa-miR-1323	0	0	1	1	1	1	ESRP1	epithelial splicing regulatory protein 1
hsa-miR-1323	1	0	1	1	1	1	AKAP2	A kinase (PRKA) anchor protein 2
hsa-miR-1323	0	0	1	0	1	1	TRMT10A	tRNA methyltransferase 10 homolog A (S. cerevisiae)
hsa-miR-1323	1	0	1	1	1	1	ENOX2	ecto-NOX disulfide-thiol exchanger 2
hsa-miR-1323	0	0	1	0	0	0	TUG1	taurine upregulated 1 (non-protein coding)
hsa-miR-1323	0	0	1	1	1	1	PARPBP	PARP1 binding protein
hsa-miR-1323	1	0	1	1	0	0	SALL2	sal-like 2 (Drosophila)
hsa-miR-1323	0	0	1	1	0	0	RFWD2	ring finger and WD repeat domain 2, E3 ubiquitin protein ligase
hsa-miR-1323	1	0	1	1	1	1	HNRNPF	heterogeneous nuclear ribonucleoprotein F
hsa-miR-1323	0	0	1	1	1	1	STOX2	storkhead box 2
hsa-miR-1323	1	0	1	1	1	1	RIC8B	resistance to inhibitors of cholinesterase 8 homolog B (C. elegans)
hsa-miR-1323	1	0	1	1	1	1	SCAMP1	secretory carrier membrane protein 1
hsa-miR-1323	1	0	1	1	1	1	EIF2C1	eukaryotic translation initiation factor 2C, 1
hsa-miR-1323	1	0	1	1	1	1	PTBP3	polypyrimidine tract binding protein 3
hsa-miR-1323	0	0	1	1	1	1	PRPF39	PRP39 pre-mRNA processing factor 39 homolog (S. cerevisiae)
hsa-miR-1323	1	0	1	0	1	1	SPATS2L	spermatogenesis associated, serine-rich 2-like
hsa-miR-1323	1	0	1	1	1	1	C12orf23	chromosome 12 open reading frame 23
hsa-miR-1323	0	0	1	1	0	0	ANAPC7	anaphase promoting complex subunit 7
hsa-miR-1323	1	0	1	1	1	1	RABGAP1	RAB GTPase activating protein 1
hsa-miR-1323	0	0	1	1	1	1	CCPG1	cell cycle progression 1
hsa-miR-1323	0	0	1	1	0	0	CCDC51	coiled-coil domain containing 51
hsa-miR-1323	1	0	1	0	1	1	LIN28A	lin-28 homolog A (C. elegans)
hsa-miR-1323	1	0	1	1	1	1	SLCO5A1	solute carrier organic anion transporter family, member 5A1
hsa-miR-1323	1	0	1	1	1	1	WDTC1	WD and tetratricopeptide repeats 1
hsa-miR-1323	1	0	1	0	1	1	DCAF17	DDB1 and CUL4 associated factor 17
hsa-miR-1323	0	0	1	1	1	1	LRRN1	leucine rich repeat neuronal 1
hsa-miR-1323	1	0	1	0	1	1	UBP1	upstream binding protein 1 (LBP-1a)
hsa-miR-1323	1	0	1	1	1	1	PHF20L1	PHD finger protein 20-like 1
hsa-miR-1323	1	0	1	1	1	1	BAZ2A	bromodomain adjacent to zinc finger domain, 2A
hsa-miR-1323	1	0	1	1	0	0	ST6GALNAC6	ST6 (alpha-N-acetyl-neuraminyl-2,3-beta-galactosyl-1,3)-N-acetylgalactosaminide alpha-2,6-sialyltransferase 6
hsa-miR-1323	0	0	1	1	1	1	CXorf57	chromosome X open reading frame 57
hsa-miR-1323	1	0	1	1	1	1	COPS7B	COP9 constitutive photomorphogenic homolog subunit 7B (Arabidopsis)
hsa-miR-1323	1	0	1	0	1	1	ATP2B1	ATPase, Ca++ transporting, plasma membrane 1
hsa-miR-1323	1	0	1	0	1	1	MYO5B	myosin VB
hsa-miR-1323	0	0	1	0	1	1	ATXN1L	ataxin 1-like
hsa-miR-1323	1	0	1	1	1	1	DLC1	deleted in liver cancer 1
hsa-miR-1323	1	0	1	1	1	1	ARFGEF1	ADP-ribosylation factor guanine nucleotide-exchange factor 1 (brefeldin A-inhibited)
hsa-miR-1323	1	0	1	1	1	1	TNRC6A	trinucleotide repeat containing 6A
hsa-miR-1323	1	0	1	1	1	1	DENND4C	DENN/MADD domain containing 4C
hsa-miR-1323	1	0	1	1	1	1	YPEL5	yippee-like 5 (Drosophila)
hsa-miR-1323	1	0	1	1	1	1	NAA30	N(alpha)-acetyltransferase 30, NatC catalytic subunit
hsa-miR-1323	1	0	1	0	1	1	ZCCHC3	zinc finger, CCHC domain containing 3
hsa-miR-1323	0	0	1	0	1	1	FLJ22763	uncharacterized LOC401081
hsa-miR-1323	1	0	1	1	0	0	SLAIN2	SLAIN motif family, member 2
hsa-miR-1323	0	0	1	1	1	1	GTF2H1	general transcription factor IIH, polypeptide 1, 62kDa
hsa-miR-1323	0	0	1	0	0	0	LOC729852	uncharacterized LOC729852
hsa-miR-1323	1	0	1	1	1	1	GORASP2	golgi reassembly stacking protein 2, 55kDa
hsa-miR-1323	1	0	1	1	1	1	SEC63	SEC63 homolog (S. cerevisiae)
hsa-miR-1323	1	0	1	1	1	1	ARHGAP36	Rho GTPase activating protein 36
hsa-miR-1323	0	0	1	0	0	0	KIAA0664L3	KIAA0664-like 3
hsa-miR-1323	0	0	1	0	0	0	LOC283508	uncharacterized LOC283508
hsa-miR-1323	0	0	1	0	0	0	NYAP2	neuronal tyrosine-phosphorylated phosphoinositide-3-kinase adaptor 2
hsa-miR-1323	0	0	1	0	0	0	THOC1	THO complex 1
hsa-miR-1323	0	0	1	0	0	0	FLJ30838	uncharacterized LOC400955
hsa-miR-1323	1	0	1	1	1	1	FRMD6	FERM domain containing 6
hsa-miR-1323	1	0	1	1	1	1	HERPUD2	HERPUD family member 2
hsa-miR-1323	1	0	1	1	1	1	DIXDC1	DIX domain containing 1
hsa-miR-1323	1	0	1	0	0	0	PWWP2A	PWWP domain containing 2A
hsa-miR-1323	1	0	1	1	1	1	TMTC1	transmembrane and tetratricopeptide repeat containing 1
hsa-miR-1323	1	0	1	0	1	1	PTPRE	protein tyrosine phosphatase, receptor type, E
hsa-miR-1323	1	0	1	1	1	1	AGPAT1	1-acylglycerol-3-phosphate O-acyltransferase 1 (lysophosphatidic acid acyltransferase, alpha)
hsa-miR-1323	1	0	1	1	1	1	SCAMP5	secretory carrier membrane protein 5
hsa-miR-1323	1	0	1	1	1	1	PHF15	PHD finger protein 15
hsa-miR-1323	0	0	1	0	0	0	FLJ30901	uncharacterized protein FLJ30901
hsa-miR-1323	1	0	1	1	1	1	SORBS2	sorbin and SH3 domain containing 2
hsa-miR-1323	0	0	1	0	0	0	LOC158376	uncharacterized LOC158376
hsa-miR-1323	1	0	1	1	1	1	ZBTB10	zinc finger and BTB domain containing 10
hsa-miR-1323	0	0	1	1	0	0	MLF1	myeloid leukemia factor 1
hsa-miR-1323	1	0	1	1	1	1	TLE4	transducin-like enhancer of split 4 (E(sp1) homolog, Drosophila)
hsa-miR-1323	1	0	1	1	1	1	MPP7	membrane protein, palmitoylated 7 (MAGUK p55 subfamily member 7)
hsa-miR-1323	0	0	1	1	0	0	NXF2	nuclear RNA export factor 2
hsa-miR-1323	1	0	1	0	1	1	PLEKHA1	pleckstrin homology domain containing, family A (phosphoinositide binding specific) member 1
hsa-miR-1323	1	0	1	1	1	1	ANKRD49	ankyrin repeat domain 49
hsa-miR-1323	1	0	1	1	1	1	HLF	hepatic leukemia factor
hsa-miR-1323	1	0	1	1	1	1	BLCAP	bladder cancer associated protein
hsa-miR-1323	1	0	1	1	1	1	SIRT1	sirtuin 1
hsa-miR-1323	1	0	1	1	1	1	MYO1B	myosin IB
hsa-miR-1323	1	0	1	1	1	1	NOTCH2NL	notch 2 N-terminal like
hsa-miR-1323	1	0	1	1	1	1	KCTD6	potassium channel tetramerisation domain containing 6
hsa-miR-1323	1	0	1	0	1	1	SLC25A37	solute carrier family 25 (mitochondrial iron transporter), member 37
hsa-miR-1323	1	0	1	1	1	1	PIP4K2C	phosphatidylinositol-5-phosphate 4-kinase, type II, gamma
hsa-miR-1323	0	0	1	1	0	0	PIGO	phosphatidylinositol glycan anchor biosynthesis, class O
hsa-miR-1323	0	0	1	0	1	1	TMSB15B	thymosin beta 15B
hsa-miR-1323	0	0	1	1	1	1	BBS9	Bardet-Biedl syndrome 9
hsa-miR-1323	1	0	1	1	1	1	AMMECR1	Alport syndrome, mental retardation, midface hypoplasia and elliptocytosis chromosomal region gene 1
hsa-miR-1323	1	0	1	1	1	1	SUPT16H	suppressor of Ty 16 homolog (S. cerevisiae)
hsa-miR-1323	1	0	1	1	1	1	FBXW2	F-box and WD repeat domain containing 2
hsa-miR-1323	0	0	1	0	0	0	KIAA1430	KIAA1430
hsa-miR-1323	1	0	1	1	1	1	EPN2	epsin 2
hsa-miR-1323	1	0	1	1	1	1	GNG2	guanine nucleotide binding protein (G protein), gamma 2
hsa-miR-1323	0	0	1	1	0	0	APOBEC3G	apolipoprotein B mRNA editing enzyme, catalytic polypeptide-like 3G
hsa-miR-1323	1	0	1	1	1	1	CLGN	calmegin
hsa-miR-1323	1	0	1	1	0	0	PRMT8	protein arginine methyltransferase 8
hsa-miR-1323	0	0	1	1	1	1	XPNPEP1	X-prolyl aminopeptidase (aminopeptidase P) 1, soluble
hsa-miR-1323	1	0	1	1	1	1	SPTBN1	spectrin, beta, non-erythrocytic 1
hsa-miR-1323	0	0	1	1	1	1	TMPRSS11D	transmembrane protease, serine 11D
hsa-miR-1323	0	0	1	1	1	1	TGFBI	transforming growth factor, beta-induced, 68kDa
hsa-miR-1323	0	0	1	1	1	1	SLC16A1	solute carrier family 16, member 1 (monocarboxylic acid transporter 1)
hsa-miR-1323	0	0	1	1	0	0	WBP1	WW domain binding protein 1
hsa-miR-1323	0	0	1	0	0	0	ZNF790-AS1	ZNF790 antisense RNA 1
hsa-miR-1323	1	0	1	1	1	1	KCND1	potassium voltage-gated channel, Shal-related subfamily, member 1
hsa-miR-1323	0	0	1	1	1	1	SPOCK1	sparc/osteonectin, cwcv and kazal-like domains proteoglycan (testican) 1
hsa-miR-1323	0	0	1	1	1	1	ACTR8	ARP8 actin-related protein 8 homolog (yeast)
hsa-miR-1323	0	0	1	0	0	0	PART1	prostate androgen-regulated transcript 1 (non-protein coding)
hsa-miR-1323	0	0	1	0	1	1	RALYL	RALY RNA binding protein-like
hsa-miR-1323	1	0	1	1	1	1	SIAH1	siah E3 ubiquitin protein ligase 1
hsa-miR-1323	1	0	1	0	1	1	GATAD2B	GATA zinc finger domain containing 2B
hsa-miR-1323	1	0	1	0	1	1	NCOA7	nuclear receptor coactivator 7
hsa-miR-1323	1	0	1	1	1	1	NMT2	N-myristoyltransferase 2
hsa-miR-1323	0	0	1	1	1	1	TMEM170A	transmembrane protein 170A
hsa-miR-1323	1	0	1	1	1	1	GCLC	glutamate-cysteine ligase, catalytic subunit
hsa-miR-1323	1	0	1	1	1	1	KANSL1	KAT8 regulatory NSL complex subunit 1
hsa-miR-1323	1	0	1	1	1	1	CPNE8	copine VIII
hsa-miR-1323	1	0	1	1	1	1	RASGEF1A	RasGEF domain family, member 1A
hsa-miR-1323	0	0	1	1	1	1	MOBP	myelin-associated oligodendrocyte basic protein
hsa-miR-1323	0	0	1	1	0	0	ZNF185	zinc finger protein 185 (LIM domain)
hsa-miR-1323	0	0	1	1	1	1	MYO6	myosin VI
hsa-miR-1323	1	0	1	0	1	1	UVRAG	UV radiation resistance associated gene
hsa-miR-1323	1	0	1	0	1	1	UBXN4	UBX domain protein 4
hsa-miR-1323	0	0	1	1	1	1	LTBR	lymphotoxin beta receptor (TNFR superfamily, member 3)
hsa-miR-1323	1	0	1	1	1	1	CNEP1R1	CTD nuclear envelope phosphatase 1 regulatory subunit 1
hsa-miR-1323	0	0	1	1	1	1	SETD2	SET domain containing 2
hsa-miR-1323	0	0	1	1	1	1	EXOC4	exocyst complex component 4
hsa-miR-1323	1	0	1	1	1	1	SPATS2	spermatogenesis associated, serine-rich 2
hsa-miR-1323	0	0	1	0	0	0	LOC284577	uncharacterized LOC284577
hsa-miR-1323	1	0	1	1	1	1	ZC3H11A	zinc finger CCCH-type containing 11A
hsa-miR-1323	1	0	1	1	1	1	PEA15	phosphoprotein enriched in astrocytes 15
hsa-miR-1323	0	0	1	1	1	1	CDKN2AIP	CDKN2A interacting protein
hsa-miR-1323	1	0	1	1	1	1	FAM98A	family with sequence similarity 98, member A
hsa-miR-1323	1	0	1	0	1	1	COL21A1	collagen, type XXI, alpha 1
hsa-miR-1323	0	0	1	1	1	1	MPHOSPH9	M-phase phosphoprotein 9
hsa-miR-1323	1	0	1	0	1	1	KIAA1737	KIAA1737
hsa-miR-1323	1	0	1	0	1	1	THRB	thyroid hormone receptor, beta
hsa-miR-1323	1	0	1	0	1	1	KBTBD8	kelch repeat and BTB (POZ) domain containing 8
hsa-miR-1323	1	0	1	1	1	1	SYT6	synaptotagmin VI
hsa-miR-1323	1	0	1	1	1	1	CDV3	CDV3 homolog (mouse)
hsa-miR-1323	0	0	1	1	1	1	EXTL2	exostoses (multiple)-like 2
hsa-miR-1323	1	0	1	1	1	1	RPL22	ribosomal protein L22
hsa-miR-1323	1	0	1	1	1	1	KL	klotho
hsa-miR-1323	1	0	1	1	1	1	POU2F3	POU class 2 homeobox 3
hsa-miR-1323	1	0	1	0	1	1	AGFG1	ArfGAP with FG repeats 1
hsa-miR-1323	0	0	1	0	0	0	LINC00293	long intergenic non-protein coding RNA 293
hsa-miR-1323	0	0	1	1	1	1	CBWD5	COBW domain containing 5
hsa-miR-1323	1	0	1	1	1	1	IGSF11	immunoglobulin superfamily, member 11
hsa-miR-1323	0	0	1	1	0	0	PSAPL1	prosaposin-like 1 (gene/pseudogene)
hsa-miR-1323	0	0	1	1	1	1	CKAP2L	cytoskeleton associated protein 2-like
hsa-miR-1323	1	0	1	1	1	1	GATM	glycine amidinotransferase (L-arginine:glycine amidinotransferase)
hsa-miR-1323	1	0	1	1	1	1	ZCCHC2	zinc finger, CCHC domain containing 2
hsa-miR-1323	1	0	1	1	1	1	CHD6	chromodomain helicase DNA binding protein 6
hsa-miR-1323	0	0	1	1	0	0	DCBLD1	discoidin, CUB and LCCL domain containing 1
hsa-miR-1323	1	0	1	1	1	1	LARP1B	La ribonucleoprotein domain family, member 1B
hsa-miR-1323	0	0	1	0	0	0	LOC338579	ankyrin repeat domain-containing protein 30B pseudogene
hsa-miR-1323	1	0	1	1	1	1	CRMP1	collapsin response mediator protein 1
hsa-miR-1323	1	0	1	1	1	1	HBP1	HMG-box transcription factor 1
hsa-miR-1323	1	0	1	1	1	1	LMX1A	LIM homeobox transcription factor 1, alpha
hsa-miR-1323	0	0	1	1	0	0	KIAA0146	KIAA0146
hsa-miR-1323	1	0	1	1	1	1	WEE1	WEE1 homolog (S. pombe)
hsa-miR-1323	1	0	1	1	1	1	SIK3	SIK family kinase 3
hsa-miR-1323	0	0	1	1	0	0	PMFBP1	polyamine modulated factor 1 binding protein 1
hsa-miR-1323	1	0	1	1	1	1	ZNF25	zinc finger protein 25
hsa-miR-1323	0	0	1	1	1	1	ZNF546	zinc finger protein 546
hsa-miR-1323	1	0	1	1	1	1	ZBTB4	zinc finger and BTB domain containing 4
hsa-miR-1323	1	0	1	1	1	1	ZNF275	zinc finger protein 275
hsa-miR-1323	0	0	1	1	1	1	FRMD5	FERM domain containing 5
hsa-miR-1323	0	0	1	1	1	1	FRMPD2	FERM and PDZ domain containing 2
hsa-miR-1323	0	0	1	1	1	1	ARHGEF26	Rho guanine nucleotide exchange factor (GEF) 26
hsa-miR-1323	1	0	1	1	1	1	FGD5	FYVE, RhoGEF and PH domain containing 5
hsa-miR-1323	1	0	1	1	1	1	KALRN	kalirin, RhoGEF kinase
hsa-miR-1323	1	0	1	1	1	1	CBLB	Cbl proto-oncogene, E3 ubiquitin protein ligase B
hsa-miR-1323	0	0	1	0	1	1	FLJ41200	uncharacterized LOC401492
hsa-miR-1323	1	0	1	1	1	1	EGLN3	egl nine homolog 3 (C. elegans)
hsa-miR-1323	0	0	1	1	1	1	RGS3	regulator of G-protein signaling 3
hsa-miR-1323	0	0	1	1	1	1	PCBP2	poly(rC) binding protein 2
hsa-miR-1323	0	0	1	0	0	0	LGALS17A	Charcot-Leyden crystal protein pseudogene
hsa-miR-1323	1	0	1	1	1	1	PHKB	phosphorylase kinase, beta
hsa-miR-1323	1	0	1	1	1	1	EPAS1	endothelial PAS domain protein 1
hsa-miR-1323	1	0	1	1	1	1	SH2D4B	SH2 domain containing 4B
hsa-miR-1323	0	0	1	1	0	0	C6orf201	chromosome 6 open reading frame 201
hsa-miR-1323	1	0	1	1	1	1	GJC1	gap junction protein, gamma 1, 45kDa
hsa-miR-1323	1	0	1	0	1	1	DCUN1D4	DCN1, defective in cullin neddylation 1, domain containing 4 (S. cerevisiae)
hsa-miR-1323	1	0	1	1	1	1	FAM122B	family with sequence similarity 122B
hsa-miR-1323	1	0	1	1	1	1	KIF21A	kinesin family member 21A
hsa-miR-1323	0	0	1	1	1	1	C2orf91	chromosome 2 open reading frame 91
hsa-miR-1323	1	0	1	1	1	1	C17orf85	chromosome 17 open reading frame 85
hsa-miR-1323	0	0	1	1	0	0	VARS2	valyl-tRNA synthetase 2, mitochondrial (putative)
hsa-miR-1323	0	0	1	0	0	0	TMEM232	transmembrane protein 232
hsa-miR-1323	1	0	1	1	1	1	C11orf30	chromosome 11 open reading frame 30
hsa-miR-1323	1	0	1	1	1	1	KTN1	kinectin 1 (kinesin receptor)
hsa-miR-1323	1	0	1	0	0	0	MSL1	male-specific lethal 1 homolog (Drosophila)
hsa-miR-1323	0	0	1	1	1	1	FAM54A	family with sequence similarity 54, member A
hsa-miR-1323	1	0	1	1	1	1	DPY19L3	dpy-19-like 3 (C. elegans)
hsa-miR-1323	0	0	1	1	1	1	SERAC1	serine active site containing 1
hsa-miR-1323	1	0	1	1	1	1	TP53INP1	tumor protein p53 inducible nuclear protein 1
hsa-miR-1323	1	0	1	1	1	1	MACROD2	MACRO domain containing 2
hsa-miR-1323	0	0	1	1	1	1	MYOM3	myomesin family, member 3
hsa-miR-1323	0	0	1	1	1	1	EPPIN	epididymal peptidase inhibitor
hsa-miR-1323	0	0	1	1	0	0	FSIP2	fibrous sheath interacting protein 2
hsa-miR-1323	1	0	1	1	1	1	PIK3R1	phosphoinositide-3-kinase, regulatory subunit 1 (alpha)
hsa-miR-1323	0	0	1	1	1	1	C18orf54	chromosome 18 open reading frame 54
hsa-miR-1323	0	0	1	1	0	0	LLGL2	lethal giant larvae homolog 2 (Drosophila)
hsa-miR-1323	0	0	1	1	1	1	BDH1	3-hydroxybutyrate dehydrogenase, type 1
hsa-miR-1323	1	0	1	1	1	1	DLG2	discs, large homolog 2 (Drosophila)
hsa-miR-1323	0	0	1	1	1	1	SPICE1	spindle and centriole associated protein 1
hsa-miR-1323	1	0	1	1	1	1	CLIP1	CAP-GLY domain containing linker protein 1
hsa-miR-1323	1	0	1	1	1	1	EIF4E3	eukaryotic translation initiation factor 4E family member 3
hsa-miR-1323	0	0	1	0	0	0	RPL23AP53	ribosomal protein L23a pseudogene 53
hsa-miR-1323	1	0	1	1	1	1	MKRN1	makorin ring finger protein 1
hsa-miR-1323	1	0	1	1	1	1	CLTC	clathrin, heavy chain (Hc)
hsa-miR-1323	1	0	1	1	1	1	MFSD6	major facilitator superfamily domain containing 6
hsa-miR-1323	1	0	1	1	0	0	SLC30A3	solute carrier family 30 (zinc transporter), member 3
hsa-miR-1323	1	0	1	1	1	1	PHF17	PHD finger protein 17
hsa-miR-1323	1	0	1	0	1	1	KIAA0182	KIAA0182
hsa-miR-1323	1	0	1	1	1	1	KANK4	KN motif and ankyrin repeat domains 4
hsa-miR-1323	1	0	1	1	1	1	ENAH	enabled homolog (Drosophila)
hsa-miR-1323	1	0	1	1	1	1	CXorf23	chromosome X open reading frame 23
hsa-miR-1323	1	0	1	0	1	1	FNDC3B	fibronectin type III domain containing 3B
hsa-miR-1323	1	0	1	0	1	1	CAPRIN1	cell cycle associated protein 1
hsa-miR-1323	0	0	1	0	1	1	LOC401321	uncharacterized LOC401321
hsa-miR-1323	1	0	1	0	1	1	YOD1	YOD1 OTU deubiquinating enzyme 1 homolog (S. cerevisiae)
hsa-miR-1323	1	0	1	0	1	1	KDM2A	lysine (K)-specific demethylase 2A
hsa-miR-1323	1	0	1	0	1	1	ZZEF1	zinc finger, ZZ-type with EF-hand domain 1
hsa-miR-1323	0	0	1	1	1	1	ATXN2	ataxin 2
hsa-miR-1323	1	0	1	1	1	1	ADAMTS19	ADAM metallopeptidase with thrombospondin type 1 motif, 19
hsa-miR-1323	0	0	1	0	0	0	LOC654433	uncharacterized LOC654433
hsa-miR-1323	1	0	1	0	1	1	ESRRG	estrogen-related receptor gamma
hsa-miR-1323	0	0	1	0	1	1	GALNT13	UDP-N-acetyl-alpha-D-galactosamine:polypeptide N-acetylgalactosaminyltransferase 13 (GalNAc-T13)
hsa-miR-1323	0	0	1	1	1	1	RAD51	RAD51 homolog (S. cerevisiae)
hsa-miR-1323	1	0	1	1	1	1	WTAP	Wilms tumor 1 associated protein
hsa-miR-1323	0	0	1	0	0	0	AGAP9	ArfGAP with GTPase domain, ankyrin repeat and PH domain 9
hsa-miR-1323	1	0	1	0	1	1	TMEM106B	transmembrane protein 106B
hsa-miR-1323	0	0	1	1	1	1	PRIM2	primase, DNA, polypeptide 2 (58kDa)
hsa-miR-1323	1	0	1	1	1	1	CYYR1	cysteine/tyrosine-rich 1
hsa-miR-1323	0	0	1	0	1	1	PEX5	peroxisomal biogenesis factor 5
hsa-miR-1323	1	0	1	1	1	1	ATL2	atlastin GTPase 2
hsa-miR-1323	1	0	1	0	1	1	CHD7	chromodomain helicase DNA binding protein 7
hsa-miR-1323	1	0	1	1	1	1	MEAF6	MYST/Esa1-associated factor 6
hsa-miR-1323	1	0	1	1	1	1	PHTF2	putative homeodomain transcription factor 2
hsa-miR-1323	1	0	1	1	1	1	LUC7L3	LUC7-like 3 (S. cerevisiae)
hsa-miR-1323	1	0	1	1	1	1	SETX	senataxin
hsa-miR-1323	1	0	1	1	1	1	NCOA1	nuclear receptor coactivator 1
hsa-miR-1323	0	0	1	1	1	1	ENPP3	ectonucleotide pyrophosphatase/phosphodiesterase 3
hsa-miR-1323	0	0	1	1	0	0	MTMR1	myotubularin related protein 1
hsa-miR-1323	1	0	1	1	1	1	NOVA1	neuro-oncological ventral antigen 1
hsa-miR-1323	1	0	1	1	1	1	NECAP1	NECAP endocytosis associated 1
hsa-miR-1323	0	0	1	0	1	1	NEK1	NIMA (never in mitosis gene a)-related kinase 1
hsa-miR-1323	0	0	1	1	0	0	NEK7	NIMA (never in mitosis gene a)-related kinase 7
hsa-miR-1323	1	0	1	1	1	1	ARF6	ADP-ribosylation factor 6
hsa-miR-1323	0	0	1	1	1	1	ARIH1	ariadne homolog, ubiquitin-conjugating enzyme E2 binding protein, 1 (Drosophila)
hsa-miR-1323	0	0	1	1	1	1	MTPAP	mitochondrial poly(A) polymerase
hsa-miR-1323	1	0	1	1	1	1	ARPP21	cAMP-regulated phosphoprotein, 21kDa
hsa-miR-1323	0	0	1	1	1	1	TTLL5	tubulin tyrosine ligase-like family, member 5
hsa-miR-1323	0	0	1	1	1	1	WDR52	WD repeat domain 52
hsa-miR-1323	0	0	1	1	1	1	GMEB2	glucocorticoid modulatory element binding protein 2
hsa-miR-1323	1	0	1	1	1	1	SMC6	structural maintenance of chromosomes 6
hsa-miR-1323	1	0	1	1	1	1	SLC25A36	solute carrier family 25 (pyrimidine nucleotide carrier ), member 36
hsa-miR-1323	1	0	1	1	1	1	FAM107B	family with sequence similarity 107, member B
hsa-miR-1323	0	0	1	1	1	1	MIOS	missing oocyte, meiosis regulator, homolog (Drosophila)
hsa-miR-1323	1	0	1	1	1	1	ERI1	exoribonuclease 1
hsa-miR-1323	1	0	1	0	1	1	GPR85	G protein-coupled receptor 85
hsa-miR-1323	0	0	1	1	0	0	DOPEY1	dopey family member 1
hsa-miR-1323	1	0	1	1	1	1	EZR	ezrin
hsa-miR-1323	1	0	1	0	1	1	FAM19A1	family with sequence similarity 19 (chemokine (C-C motif)-like), member A1
hsa-miR-1323	0	0	1	1	1	1	COBL	cordon-bleu homolog (mouse)
hsa-miR-1323	1	0	1	1	1	1	YTHDF3	YTH domain family, member 3
hsa-miR-1323	1	0	1	1	1	1	DENND1B	DENN/MADD domain containing 1B
hsa-miR-1323	1	0	1	1	1	1	TMEFF1	transmembrane protein with EGF-like and two follistatin-like domains 1
hsa-miR-1323	1	0	1	1	1	1	MIER1	mesoderm induction early response 1 homolog (Xenopus laevis)
hsa-miR-1323	0	0	1	1	1	1	BEND7	BEN domain containing 7
hsa-miR-1323	1	0	1	1	1	1	FAM126B	family with sequence similarity 126, member B
hsa-miR-1323	0	0	1	1	1	1	RAD51AP1	RAD51 associated protein 1
hsa-miR-1323	0	0	1	0	1	1	METTL20	methyltransferase like 20
hsa-miR-1323	1	0	1	0	0	0	YLPM1	YLP motif containing 1
hsa-miR-1323	0	0	1	1	1	1	MYPN	myopalladin
hsa-miR-1323	1	0	1	1	1	1	MLL3	myeloid/lymphoid or mixed-lineage leukemia 3
hsa-miR-1323	1	0	1	1	1	1	RNF180	ring finger protein 180
hsa-miR-1323	0	0	1	1	1	1	YAP1	Yes-associated protein 1
hsa-miR-1323	1	0	1	1	1	1	NABP1	nucleic acid binding protein 1
hsa-miR-1323	1	0	1	1	1	1	EHMT1	euchromatic histone-lysine N-methyltransferase 1
hsa-miR-1323	0	0	1	1	1	1	CYR61	cysteine-rich, angiogenic inducer, 61
hsa-miR-1323	0	0	1	1	1	1	WHSC1L1	Wolf-Hirschhorn syndrome candidate 1-like 1
hsa-miR-1323	0	0	1	1	1	1	ZMYM6	zinc finger, MYM-type 6
hsa-miR-1323	1	0	1	0	1	1	MEF2C	myocyte enhancer factor 2C
hsa-miR-1323	0	0	1	1	1	1	CEP192	centrosomal protein 192kDa
hsa-miR-1323	0	0	1	1	1	1	KIAA1841	KIAA1841
hsa-miR-1323	1	0	1	0	1	1	CNOT7	CCR4-NOT transcription complex, subunit 7
hsa-miR-1323	1	0	1	0	1	1	LMBR1	limb region 1 homolog (mouse)
hsa-miR-1323	0	0	1	1	0	0	TTLL6	tubulin tyrosine ligase-like family, member 6
hsa-miR-1323	0	0	1	1	1	1	C8orf34	chromosome 8 open reading frame 34
hsa-miR-1323	1	0	1	1	1	1	RICTOR	RPTOR independent companion of MTOR, complex 2
hsa-miR-1323	1	0	1	1	1	1	BOLL	bol, boule-like (Drosophila)
hsa-miR-1323	0	0	1	1	1	1	LMAN2L	lectin, mannose-binding 2-like
hsa-miR-1323	1	0	1	1	1	1	FAM76B	family with sequence similarity 76, member B
hsa-miR-1323	1	0	1	0	1	1	PATL1	protein associated with topoisomerase II homolog 1 (yeast)
hsa-miR-1323	1	0	1	1	1	1	SET	SET nuclear oncogene
hsa-miR-1323	1	0	1	1	0	0	LRRC58	leucine rich repeat containing 58
hsa-miR-1323	0	0	1	0	1	1	USO1	USO1 vesicle docking protein homolog (yeast)
hsa-miR-1323	0	0	1	1	0	0	TMEM134	transmembrane protein 134
hsa-miR-1323	0	0	1	1	0	0	PPP3CC	protein phosphatase 3, catalytic subunit, gamma isozyme
hsa-miR-1323	1	0	1	1	1	1	IKZF2	IKAROS family zinc finger 2 (Helios)
hsa-miR-1323	0	0	1	0	0	0	PMCHL2	pro-melanin-concentrating hormone-like 2, pseudogene
hsa-miR-1323	0	0	1	1	1	1	KLHL7	kelch-like 7 (Drosophila)
hsa-miR-1323	0	0	1	1	0	0	ERAP2	endoplasmic reticulum aminopeptidase 2
hsa-miR-1323	0	0	1	1	0	0	FAM176C	family with sequence similarity 176, member C
hsa-miR-1323	1	0	1	1	1	1	MIPOL1	mirror-image polydactyly 1
hsa-miR-1323	1	0	1	1	1	1	KIAA0907	KIAA0907
hsa-miR-1323	0	0	1	1	1	1	NFXL1	nuclear transcription factor, X-box binding-like 1
hsa-miR-1323	0	0	1	1	1	1	SHPRH	SNF2 histone linker PHD RING helicase, E3 ubiquitin protein ligase
hsa-miR-1323	0	0	1	1	1	1	DNAJB14	DnaJ (Hsp40) homolog, subfamily B, member 14
hsa-miR-1323	1	0	1	1	1	1	WDR26	WD repeat domain 26
hsa-miR-1323	1	0	1	1	1	1	BCL11A	B-cell CLL/lymphoma 11A (zinc finger protein)
hsa-miR-1323	1	0	1	1	1	1	PNRC1	proline-rich nuclear receptor coactivator 1
hsa-miR-1323	1	0	1	1	1	1	TAB3	TGF-beta activated kinase 1/MAP3K7 binding protein 3
hsa-miR-1323	0	0	1	1	1	1	ATF7IP	activating transcription factor 7 interacting protein
hsa-miR-1323	0	0	1	1	1	1	MFAP5	microfibrillar associated protein 5
hsa-miR-1323	1	0	1	1	1	1	NPM1	nucleophosmin (nucleolar phosphoprotein B23, numatrin)
hsa-miR-1323	1	0	1	1	1	1	CAMTA1	calmodulin binding transcription activator 1
hsa-miR-1323	1	0	1	1	1	1	IQGAP2	IQ motif containing GTPase activating protein 2
hsa-miR-1323	0	0	1	0	1	1	ANKS1B	ankyrin repeat and sterile alpha motif domain containing 1B
hsa-miR-1323	0	0	1	1	1	1	IL20	interleukin 20
hsa-miR-1323	0	0	1	1	1	1	GPR114	G protein-coupled receptor 114
hsa-miR-1323	1	0	1	1	1	1	NLGN4X	neuroligin 4, X-linked
hsa-miR-1323	0	0	1	1	1	1	TNFRSF19	tumor necrosis factor receptor superfamily, member 19
hsa-miR-1323	1	0	1	1	0	0	CLASRP	CLK4-associating serine/arginine rich protein
hsa-miR-1323	1	0	1	1	1	1	ECT2	epithelial cell transforming sequence 2 oncogene
hsa-miR-1323	1	0	1	1	1	1	SP3	Sp3 transcription factor
hsa-miR-1323	1	0	1	1	1	1	ANKRD11	ankyrin repeat domain 11
hsa-miR-1323	1	0	1	1	1	1	MECP2	methyl CpG binding protein 2 (Rett syndrome)
hsa-miR-1323	1	0	1	1	1	1	LAMP2	lysosomal-associated membrane protein 2
hsa-miR-1323	0	0	1	1	1	1	ILDR1	immunoglobulin-like domain containing receptor 1
hsa-miR-1323	1	0	1	1	1	1	PLCH1	phospholipase C, eta 1
hsa-miR-1323	1	0	1	1	1	1	RTN3	reticulon 3
hsa-miR-1323	1	0	1	1	1	1	PFKFB4	6-phosphofructo-2-kinase/fructose-2,6-biphosphatase 4
hsa-miR-1323	0	0	1	1	1	1	NOLC1	nucleolar and coiled-body phosphoprotein 1
hsa-miR-1323	1	0	1	1	1	1	TBC1D22B	TBC1 domain family, member 22B
hsa-miR-1323	1	0	1	1	1	1	AMOT	angiomotin
hsa-miR-1323	1	0	1	0	1	1	FAM46A	family with sequence similarity 46, member A
hsa-miR-1323	0	0	1	1	0	0	GFOD2	glucose-fructose oxidoreductase domain containing 2
hsa-miR-1323	0	0	1	1	1	1	SNX11	sorting nexin 11
hsa-miR-1323	0	0	1	1	1	1	ENOPH1	enolase-phosphatase 1
hsa-miR-1323	0	0	1	1	1	1	PAFAH1B2	platelet-activating factor acetylhydrolase 1b, catalytic subunit 2 (30kDa)
hsa-miR-1323	0	0	1	1	1	1	RLIM	ring finger protein, LIM domain interacting
hsa-miR-1323	1	0	1	1	1	1	MYCN	v-myc myelocytomatosis viral related oncogene, neuroblastoma derived (avian)
hsa-miR-1323	1	0	1	1	1	1	RIMS3	regulating synaptic membrane exocytosis 3
hsa-miR-1323	0	0	1	1	1	1	REXO2	REX2, RNA exonuclease 2 homolog (S. cerevisiae)
hsa-miR-1323	1	0	1	0	1	1	DCAF10	DDB1 and CUL4 associated factor 10
hsa-miR-1323	1	0	1	0	1	1	CGGBP1	CGG triplet repeat binding protein 1
hsa-miR-1323	1	0	1	1	1	1	POU2F2	POU class 2 homeobox 2
hsa-miR-1323	1	0	1	1	1	1	U2SURP	U2 snRNP-associated SURP domain containing
hsa-miR-1323	1	0	1	1	1	1	CALM1	calmodulin 1 (phosphorylase kinase, delta)
hsa-miR-1323	0	0	1	0	1	1	TMEM169	transmembrane protein 169
hsa-miR-1323	0	0	1	1	0	0	PRR11	proline rich 11
hsa-miR-1323	1	0	1	1	1	1	ATP6AP2	ATPase, H+ transporting, lysosomal accessory protein 2
hsa-miR-1323	1	0	1	1	1	1	ZFAND5	zinc finger, AN1-type domain 5
hsa-miR-1323	0	0	1	1	1	1	HDHD2	haloacid dehalogenase-like hydrolase domain containing 2
hsa-miR-1323	1	0	1	1	1	1	BTG3	BTG family, member 3
hsa-miR-1323	0	0	1	1	1	1	H2AFY	H2A histone family, member Y
hsa-miR-1323	0	0	1	1	1	1	RNF170	ring finger protein 170
hsa-miR-1323	1	0	1	1	1	1	ETF1	eukaryotic translation termination factor 1
hsa-miR-1323	1	0	1	1	1	1	PRDM2	PR domain containing 2, with ZNF domain
hsa-miR-1323	1	0	1	1	1	1	PAPOLA	poly(A) polymerase alpha
hsa-miR-1323	0	0	1	0	0	0	KLHL15	kelch-like 15 (Drosophila)
hsa-miR-1323	1	0	1	1	1	1	ZNF512	zinc finger protein 512
hsa-miR-1323	0	0	1	0	1	1	ZNF37A	zinc finger protein 37A
hsa-miR-1323	0	0	1	1	1	1	KRCC1	lysine-rich coiled-coil 1
hsa-miR-1323	1	0	1	1	1	1	TIA1	TIA1 cytotoxic granule-associated RNA binding protein
hsa-miR-1323	1	0	1	1	1	1	FAM199X	family with sequence similarity 199, X-linked
hsa-miR-1323	0	0	1	1	1	1	MBIP	MAP3K12 binding inhibitory protein 1
hsa-miR-1323	1	0	1	1	1	1	NRF1	nuclear respiratory factor 1
hsa-miR-1323	1	0	1	1	1	1	HMGA2	high mobility group AT-hook 2
hsa-miR-1323	1	0	1	0	1	1	SLC19A2	solute carrier family 19 (thiamine transporter), member 2
hsa-miR-1323	1	0	1	1	1	1	NKTR	natural killer-tumor recognition sequence
hsa-miR-1323	0	0	1	0	1	1	ZNF718	zinc finger protein 718
hsa-miR-1323	0	0	1	1	1	1	C10orf88	chromosome 10 open reading frame 88
hsa-miR-1323	1	0	1	1	1	1	TMEM71	transmembrane protein 71
hsa-miR-1323	0	0	1	1	1	1	RNF103	ring finger protein 103
hsa-miR-1323	1	0	1	0	1	1	CDK19	cyclin-dependent kinase 19
hsa-miR-1323	1	0	1	1	1	1	ASPH	aspartate beta-hydroxylase
hsa-miR-1323	0	0	1	1	1	1	TLR4	toll-like receptor 4
hsa-miR-1323	1	0	1	1	1	1	NIPA1	non imprinted in Prader-Willi/Angelman syndrome 1
hsa-miR-1323	0	0	1	1	1	1	FAM221A	family with sequence similarity 221, member A
hsa-miR-1323	0	0	1	1	1	1	DSN1	DSN1, MIND kinetochore complex component, homolog (S. cerevisiae)
hsa-miR-1323	1	0	1	1	1	1	VASP	vasodilator-stimulated phosphoprotein
hsa-miR-1323	1	0	1	1	1	1	CNTN4	contactin 4
hsa-miR-1323	1	0	1	1	1	1	EPHA4	EPH receptor A4
hsa-miR-1323	1	0	1	1	1	1	PHF2	PHD finger protein 2
hsa-miR-1323	1	0	1	0	1	1	NCAM1	neural cell adhesion molecule 1
hsa-miR-1323	0	0	1	1	1	1	ASTN2	astrotactin 2
hsa-miR-1323	0	0	1	1	1	1	F11	coagulation factor XI
hsa-miR-1323	0	0	1	1	1	1	LRMP	lymphoid-restricted membrane protein
hsa-miR-1323	0	0	1	1	1	1	SEMA3D	sema domain, immunoglobulin domain (Ig), short basic domain, secreted, (semaphorin) 3D
hsa-miR-1323	0	0	1	1	1	1	SLC51A	solute carrier family 51, alpha subunit
hsa-miR-1323	0	0	1	1	1	1	TFAM	transcription factor A, mitochondrial
hsa-miR-1323	1	0	1	0	1	1	PSMF1	proteasome (prosome, macropain) inhibitor subunit 1 (PI31)
hsa-miR-1323	0	0	1	1	0	0	TSPAN16	tetraspanin 16
hsa-miR-1323	1	0	1	1	1	1	TIAL1	TIA1 cytotoxic granule-associated RNA binding protein-like 1
hsa-miR-1323	0	0	1	1	1	1	CCP110	centriolar coiled coil protein 110kDa
hsa-miR-1323	1	0	1	1	1	1	EYA4	eyes absent homolog 4 (Drosophila)
hsa-miR-1323	1	0	1	1	1	1	TAF15	TAF15 RNA polymerase II, TATA box binding protein (TBP)-associated factor, 68kDa
hsa-miR-1323	1	0	1	1	1	1	ELAVL2	ELAV (embryonic lethal, abnormal vision, Drosophila)-like 2 (Hu antigen B)
hsa-miR-1323	0	0	1	0	1	1	ERAP1	endoplasmic reticulum aminopeptidase 1
hsa-miR-1323	1	0	1	1	1	1	ZNF518A	zinc finger protein 518A
hsa-miR-1323	1	0	1	1	1	1	ZPLD1	zona pellucida-like domain containing 1
hsa-miR-1323	0	0	1	0	1	1	B3GALTL	beta 1,3-galactosyltransferase-like
hsa-miR-1323	1	0	1	0	1	1	RNF4	ring finger protein 4
hsa-miR-1323	0	0	1	1	1	1	CEPT1	choline/ethanolamine phosphotransferase 1
hsa-miR-1323	1	0	1	1	1	1	TTC39C	tetratricopeptide repeat domain 39C
hsa-miR-1323	1	0	1	1	1	1	RAB5B	RAB5B, member RAS oncogene family
hsa-miR-1323	1	0	1	1	1	1	SECISBP2L	SECIS binding protein 2-like
hsa-miR-1323	1	0	1	1	1	1	HMGCR	3-hydroxy-3-methylglutaryl-CoA reductase
hsa-miR-1323	1	0	1	1	1	1	PCDHA5	protocadherin alpha 5
hsa-miR-1323	0	0	1	1	1	1	ZCCHC7	zinc finger, CCHC domain containing 7
hsa-miR-1323	0	0	1	1	1	1	NUB1	negative regulator of ubiquitin-like proteins 1
hsa-miR-1323	1	0	1	1	1	1	FAM120A	family with sequence similarity 120A
hsa-miR-1323	1	0	1	0	1	1	DDX3Y	DEAD (Asp-Glu-Ala-Asp) box polypeptide 3, Y-linked
hsa-miR-1323	1	0	1	1	1	1	ZZZ3	zinc finger, ZZ-type containing 3
hsa-miR-1323	1	0	1	0	1	1	ATP11A	ATPase, class VI, type 11A
hsa-miR-1323	1	0	1	1	1	1	ZEB2	zinc finger E-box binding homeobox 2
hsa-miR-1323	1	0	1	1	1	1	CTDSPL2	CTD (carboxy-terminal domain, RNA polymerase II, polypeptide A) small phosphatase like 2
hsa-miR-1323	0	0	1	1	1	1	SEC24D	SEC24 family, member D (S. cerevisiae)
hsa-miR-1323	0	0	1	1	1	1	ARHGAP6	Rho GTPase activating protein 6
hsa-miR-1323	0	0	1	1	1	1	TMEM144	transmembrane protein 144
hsa-miR-1323	0	0	1	0	0	0	LOC339862	uncharacterized LOC339862
hsa-miR-1323	0	0	1	0	0	0	HOXA-AS2	HOXA cluster antisense RNA 2
hsa-miR-1323	0	0	1	1	0	0	VPS8	vacuolar protein sorting 8 homolog (S. cerevisiae)
hsa-miR-1323	0	0	1	1	1	1	SNAPC3	small nuclear RNA activating complex, polypeptide 3, 50kDa
hsa-miR-1323	1	0	1	1	1	1	PEX5L	peroxisomal biogenesis factor 5-like
hsa-miR-1323	1	0	1	1	1	1	SLC38A9	solute carrier family 38, member 9
hsa-miR-1323	1	0	1	1	1	1	HECTD2	HECT domain containing E3 ubiquitin protein ligase 2
hsa-miR-1323	0	0	1	0	0	0	LOC652276	potassium channel tetramerisation domain containing 5 pseudogene
hsa-miR-1323	1	0	1	0	1	1	CLDN12	claudin 12
hsa-miR-1323	0	0	1	1	1	1	PLGRKT	plasminogen receptor, C-terminal lysine transmembrane protein
hsa-miR-1323	0	0	1	0	0	0	LOC286184	uncharacterized LOC286184
hsa-miR-1323	1	0	1	1	1	1	SLC35F3	solute carrier family 35, member F3
hsa-miR-1323	1	0	1	1	1	1	WSCD2	WSC domain containing 2
hsa-miR-1323	1	0	1	1	1	1	DAAM1	dishevelled associated activator of morphogenesis 1
hsa-miR-1323	1	0	1	1	1	1	FOXK1	forkhead box K1
hsa-miR-1323	1	0	1	1	1	1	DPP10	dipeptidyl-peptidase 10 (non-functional)
hsa-miR-1323	1	0	1	0	1	1	ARID2	AT rich interactive domain 2 (ARID, RFX-like)
hsa-miR-1323	0	0	1	0	0	0	LOC100134868	uncharacterized LOC100134868
hsa-miR-1323	1	0	1	1	0	0	PROSAPIP1	ProSAPiP1 protein
hsa-miR-1323	0	0	1	1	0	0	CCDC152	coiled-coil domain containing 152
hsa-miR-1323	1	0	1	1	1	1	FGFR2	fibroblast growth factor receptor 2
hsa-miR-1323	1	0	1	1	1	1	NFYA	nuclear transcription factor Y, alpha
hsa-miR-1323	1	0	1	1	1	1	PAIP2	poly(A) binding protein interacting protein 2
hsa-miR-1323	0	0	1	0	0	0	USP32P1	ubiquitin specific peptidase 32 pseudogene 1
hsa-miR-1323	1	0	1	1	1	1	MARCKS	myristoylated alanine-rich protein kinase C substrate
hsa-miR-1323	0	0	1	1	1	1	FBXL4	F-box and leucine-rich repeat protein 4
hsa-miR-1323	0	0	1	1	1	1	VBP1	von Hippel-Lindau binding protein 1
hsa-miR-1323	0	0	1	1	1	1	SLTM	SAFB-like, transcription modulator
hsa-miR-1323	1	0	1	1	1	1	DACH2	dachshund homolog 2 (Drosophila)
hsa-miR-1323	0	0	1	1	1	1	SCLT1	sodium channel and clathrin linker 1
hsa-miR-1323	0	0	1	1	1	1	TMEM45A	transmembrane protein 45A
hsa-miR-1323	1	0	1	1	1	1	SLITRK3	SLIT and NTRK-like family, member 3
hsa-miR-1323	1	0	1	0	1	1	PCSK2	proprotein convertase subtilisin/kexin type 2
hsa-miR-1323	0	0	1	1	1	1	SIAE	sialic acid acetylesterase
hsa-miR-1323	0	0	1	1	0	0	SCAND1	SCAN domain containing 1
hsa-miR-1323	0	0	1	1	0	0	KIAA1432	KIAA1432
hsa-miR-1323	0	0	1	1	1	1	C17orf104	chromosome 17 open reading frame 104
hsa-miR-1323	1	0	1	1	1	1	TNFSF4	tumor necrosis factor (ligand) superfamily, member 4
hsa-miR-1323	0	0	1	1	1	1	CARD8	caspase recruitment domain family, member 8
hsa-miR-1323	1	0	1	0	1	1	TNFAIP3	tumor necrosis factor, alpha-induced protein 3
hsa-miR-1323	1	0	1	1	1	1	ROCK1	Rho-associated, coiled-coil containing protein kinase 1
hsa-miR-1323	1	0	1	1	1	1	CLOCK	clock homolog (mouse)
hsa-miR-1323	0	0	1	1	1	1	C4orf32	chromosome 4 open reading frame 32
hsa-miR-1323	1	0	1	1	1	1	NPL	N-acetylneuraminate pyruvate lyase (dihydrodipicolinate synthase)
hsa-miR-1323	0	0	1	1	1	1	C3orf33	chromosome 3 open reading frame 33
hsa-miR-1323	0	0	1	0	0	0	LOC401176	uncharacterized LOC401176
hsa-miR-1323	1	0	1	1	0	0	WNK1	WNK lysine deficient protein kinase 1
hsa-miR-1323	1	0	1	1	1	1	HLTF	helicase-like transcription factor
hsa-miR-1323	1	0	1	0	1	1	PSD3	pleckstrin and Sec7 domain containing 3
hsa-miR-1323	0	0	1	0	0	0	LOC728342	uncharacterized LOC728342
hsa-miR-1323	0	0	1	1	1	1	DOCK8	dedicator of cytokinesis 8
hsa-miR-1323	1	0	1	1	1	1	SENP1	SUMO1/sentrin specific peptidase 1
hsa-miR-1323	1	0	1	1	1	1	SF3B1	splicing factor 3b, subunit 1, 155kDa
hsa-miR-1323	0	0	1	1	1	1	LOC100499484-C9ORF174	LOC100499484-C9orf174 readthrough
hsa-miR-1323	1	0	1	1	1	1	SLC35G1	solute carrier family 35, member G1
hsa-miR-1323	0	0	1	1	1	1	DDX4	DEAD (Asp-Glu-Ala-Asp) box polypeptide 4
hsa-miR-1323	1	0	1	1	1	1	KIF2A	kinesin heavy chain member 2A
hsa-miR-1323	0	0	1	0	0	0	LOC729678	uncharacterized LOC729678
hsa-miR-1323	1	0	1	0	1	1	ZNF800	zinc finger protein 800
hsa-miR-1323	1	0	1	1	1	1	RTKN2	rhotekin 2
hsa-miR-1323	1	0	1	1	1	1	WSB1	WD repeat and SOCS box containing 1
hsa-miR-1323	0	0	1	1	1	1	ZNF589	zinc finger protein 589
hsa-miR-1323	1	0	1	1	1	1	PELI1	pellino E3 ubiquitin protein ligase 1
hsa-miR-1323	1	0	1	0	1	1	ARHGAP5	Rho GTPase activating protein 5
hsa-miR-1323	0	0	1	0	1	1	ITGA1	integrin, alpha 1
hsa-miR-1323	1	0	1	1	1	1	ANGPTL1	angiopoietin-like 1
hsa-miR-1323	0	0	1	1	0	0	TRABD2A	TraB domain containing 2A
hsa-miR-1323	1	0	1	1	1	1	YWHAZ	tyrosine 3-monooxygenase/tryptophan 5-monooxygenase activation protein, zeta polypeptide
hsa-miR-1323	1	0	1	1	1	1	PCGF5	polycomb group ring finger 5
hsa-miR-1323	1	0	1	0	1	1	C14orf43	chromosome 14 open reading frame 43
hsa-miR-1323	1	0	1	1	1	1	HP1BP3	heterochromatin protein 1, binding protein 3
hsa-miR-1323	0	0	1	1	1	1	LRRFIP2	leucine rich repeat (in FLII) interacting protein 2
hsa-miR-1323	0	0	1	1	0	0	CRYM-AS1	CRYM antisense RNA 1
hsa-miR-1323	1	0	1	1	1	1	ZFP161	zinc finger protein 161 homolog (mouse)
hsa-miR-1323	1	0	1	1	1	1	KLHL28	kelch-like 28 (Drosophila)
hsa-miR-1323	1	0	1	1	1	1	SOX5	SRY (sex determining region Y)-box 5
hsa-miR-1323	1	0	1	1	1	1	PRRG1	proline rich Gla (G-carboxyglutamic acid) 1
hsa-miR-1323	1	0	1	0	1	1	PLEKHH2	pleckstrin homology domain containing, family H (with MyTH4 domain) member 2
hsa-miR-1323	1	0	1	1	1	1	RANBP9	RAN binding protein 9
hsa-miR-1323	1	0	1	1	1	1	MYLK	myosin light chain kinase
hsa-miR-1323	0	0	1	1	0	0	PLB1	phospholipase B1
hsa-miR-1323	1	0	1	1	1	1	EIF4G2	eukaryotic translation initiation factor 4 gamma, 2
hsa-miR-1323	1	0	1	1	1	1	VTCN1	V-set domain containing T cell activation inhibitor 1
hsa-miR-1323	1	0	1	1	1	1	SIN3A	SIN3 transcription regulator homolog A (yeast)
hsa-miR-1323	0	0	1	0	0	0	UBE2Q2P2	ubiquitin-conjugating enzyme E2Q family member 2 pseudogene 2
hsa-miR-1323	1	0	1	1	1	1	VIM	vimentin
hsa-miR-1323	1	0	1	1	1	1	AP3M1	adaptor-related protein complex 3, mu 1 subunit
hsa-miR-1323	0	0	1	1	1	1	KCTD18	potassium channel tetramerisation domain containing 18
hsa-miR-1323	1	0	1	1	1	1	CDKN1C	cyclin-dependent kinase inhibitor 1C (p57, Kip2)
hsa-miR-1323	0	0	1	0	0	0	ZNF66P	zinc finger protein 66, pseudogene
hsa-miR-1323	1	0	1	1	1	1	BAZ2B	bromodomain adjacent to zinc finger domain, 2B
hsa-miR-1323	1	0	1	1	1	1	SRPK2	SRSF protein kinase 2
hsa-miR-1323	0	0	1	0	0	0	PTGER4P2	prostaglandin E receptor 4 (subtype EP4) pseudogene 2
hsa-miR-1323	0	0	1	0	0	0	AQP7P2	aquaporin 7 pseudogene 2
hsa-miR-1323	1	0	1	1	1	1	USP47	ubiquitin specific peptidase 47
hsa-miR-1323	1	0	1	0	1	1	MAP4K3	mitogen-activated protein kinase kinase kinase kinase 3
hsa-miR-1323	0	0	1	1	1	1	PCDH18	protocadherin 18
hsa-miR-1323	0	0	1	0	0	0	JPX	JPX transcript, XIST activator (non-protein coding)
hsa-miR-1323	0	0	1	1	1	1	FRMPDP2	FERM and PDZ domain containing 2 pseudogene 2
hsa-miR-1323	0	0	1	1	1	1	FRMPD2P1	FERM and PDZ domain containing 2 pseudogene 1
hsa-miR-1323	1	0	1	1	1	1	OPCML	opioid binding protein/cell adhesion molecule-like
hsa-miR-1323	1	0	1	1	1	1	WNT5A	wingless-type MMTV integration site family, member 5A
hsa-miR-1323	0	0	1	1	0	0	UGT8	UDP glycosyltransferase 8
hsa-miR-1323	0	0	1	1	1	1	C3orf67	chromosome 3 open reading frame 67
hsa-miR-1323	0	0	1	0	0	0	TBC1D25	TBC1 domain family, member 25
hsa-miR-1323	1	0	1	1	1	1	HNRNPC	heterogeneous nuclear ribonucleoprotein C (C1/C2)
hsa-miR-1323	1	0	1	1	1	1	SYNE1	spectrin repeat containing, nuclear envelope 1
hsa-miR-1323	1	0	1	1	1	1	ZMYND11	zinc finger, MYND-type containing 11
hsa-miR-1323	0	0	1	1	1	1	SPDYA	speedy homolog A (Xenopus laevis)
hsa-miR-1323	0	0	1	1	1	1	NDUFB5	NADH dehydrogenase (ubiquinone) 1 beta subcomplex, 5, 16kDa
hsa-miR-1323	1	0	1	1	1	1	GIGYF2	GRB10 interacting GYF protein 2
hsa-miR-1323	1	0	1	1	1	1	ARHGAP44	Rho GTPase activating protein 44
hsa-miR-1323	1	0	1	0	1	1	PIK3R3	phosphoinositide-3-kinase, regulatory subunit 3 (gamma)
hsa-miR-1323	1	0	1	1	1	1	ELOVL7	ELOVL fatty acid elongase 7
hsa-miR-1323	1	0	1	1	1	1	STK38	serine/threonine kinase 38
hsa-miR-1323	1	0	1	1	1	1	ACVR2B	activin A receptor, type IIB
hsa-miR-1323	1	0	1	1	1	1	FGD4	FYVE, RhoGEF and PH domain containing 4
hsa-miR-1323	1	0	1	0	1	1	LRRTM4	leucine rich repeat transmembrane neuronal 4
hsa-miR-1323	1	0	1	1	1	1	SYNJ1	synaptojanin 1
hsa-miR-1323	1	0	1	1	1	1	KRIT1	KRIT1, ankyrin repeat containing
hsa-miR-1323	1	0	1	0	1	1	ARPP19	cAMP-regulated phosphoprotein, 19kDa
hsa-miR-1323	1	0	1	0	1	1	MYBL1	v-myb myeloblastosis viral oncogene homolog (avian)-like 1
hsa-miR-1323	1	0	1	1	0	0	HAND2	heart and neural crest derivatives expressed 2
hsa-miR-1323	1	0	1	1	1	1	ARFIP1	ADP-ribosylation factor interacting protein 1
hsa-miR-1323	1	0	1	0	1	1	CPEB2	cytoplasmic polyadenylation element binding protein 2
hsa-miR-1323	1	0	1	0	1	1	KCNT2	potassium channel, subfamily T, member 2
hsa-miR-1323	0	0	1	0	0	0	LSAMP-AS3	LSAMP antisense RNA 3
hsa-miR-1323	0	0	1	0	0	0	C5orf49	chromosome 5 open reading frame 49
hsa-miR-1323	0	0	1	1	1	1	CCDC126	coiled-coil domain containing 126
hsa-miR-1323	0	0	1	1	1	1	SPHKAP	SPHK1 interactor, AKAP domain containing
hsa-miR-1323	1	0	1	1	1	1	GABRB2	gamma-aminobutyric acid (GABA) A receptor, beta 2
hsa-miR-1323	1	0	1	1	1	1	NR2F2	nuclear receptor subfamily 2, group F, member 2
hsa-miR-1323	1	0	1	1	1	1	PTPRD	protein tyrosine phosphatase, receptor type, D
hsa-miR-1323	0	0	1	1	0	0	FMN1	formin 1
hsa-miR-1323	1	0	1	1	1	1	USP34	ubiquitin specific peptidase 34
hsa-miR-1323	0	0	1	1	1	1	TTN	titin
hsa-miR-1323	1	0	1	1	1	1	SUV420H1	suppressor of variegation 4-20 homolog 1 (Drosophila)
hsa-miR-1323	1	0	1	1	1	1	TBP	TATA box binding protein
hsa-miR-1323	1	0	1	1	1	1	SP4	Sp4 transcription factor
hsa-miR-1323	1	0	1	0	1	1	BTBD3	BTB (POZ) domain containing 3
hsa-miR-1323	1	0	1	0	1	1	KIF5C	kinesin family member 5C
hsa-miR-1323	1	0	1	1	1	1	HNRNPR	heterogeneous nuclear ribonucleoprotein R
hsa-miR-1323	0	0	1	1	1	1	SMTNL2	smoothelin-like 2
hsa-miR-1323	1	0	1	1	1	1	PPP4R2	protein phosphatase 4, regulatory subunit 2
hsa-miR-1323	1	0	1	1	1	1	NR3C2	nuclear receptor subfamily 3, group C, member 2
hsa-miR-1323	0	0	1	1	0	0	C9orf84	chromosome 9 open reading frame 84
hsa-miR-1323	0	0	1	1	1	1	ZNF621	zinc finger protein 621
hsa-miR-1323	1	0	1	1	1	1	PPP6R1	protein phosphatase 6, regulatory subunit 1
hsa-miR-1323	1	0	1	0	1	1	PRDM10	PR domain containing 10
hsa-miR-1323	0	0	1	1	1	1	C5orf47	chromosome 5 open reading frame 47
hsa-miR-1323	0	0	1	1	1	1	SULT1C4	sulfotransferase family, cytosolic, 1C, member 4
hsa-miR-1323	1	0	1	0	1	1	CAMSAP2	calmodulin regulated spectrin-associated protein family, member 2
hsa-miR-1323	0	0	1	0	0	0	C3orf55	chromosome 3 open reading frame 55
hsa-miR-1323	1	0	1	1	1	1	TRAPPC8	trafficking protein particle complex 8
hsa-miR-1323	1	0	1	1	1	1	INSC	inscuteable homolog (Drosophila)
hsa-miR-1323	1	0	1	1	1	1	CHIC1	cysteine-rich hydrophobic domain 1
hsa-miR-1323	0	0	1	0	1	1	C20orf202	chromosome 20 open reading frame 202
hsa-miR-1323	1	0	1	1	1	1	MLLT10	myeloid/lymphoid or mixed-lineage leukemia (trithorax homolog, Drosophila); translocated to, 10
hsa-miR-1323	0	0	1	0	0	0	FAM225B	family with sequence similarity 225, member B (non-protein coding)
hsa-miR-1323	1	0	1	0	1	1	NFAT5	nuclear factor of activated T-cells 5, tonicity-responsive
hsa-miR-1323	0	0	1	1	0	0	TCHH	trichohyalin
hsa-miR-1323	0	0	1	1	0	0	CCDC144A	coiled-coil domain containing 144A
hsa-miR-1323	1	0	1	0	0	0	SDR39U1	short chain dehydrogenase/reductase family 39U, member 1
hsa-miR-1323	1	0	1	1	1	1	NUMB	numb homolog (Drosophila)
hsa-miR-1323	0	0	1	0	1	1	C14orf23	chromosome 14 open reading frame 23
hsa-miR-1323	1	0	1	1	1	1	ERMAP	erythroblast membrane-associated protein (Scianna blood group)
hsa-miR-1323	0	0	1	1	1	1	RAD17	RAD17 homolog (S. pombe)
hsa-miR-1323	1	0	1	1	0	0	KRT80	keratin 80
hsa-miR-1323	0	0	1	0	0	0	ADCY10P1	adenylate cyclase 10 (soluble) pseudogene 1
hsa-miR-1323	1	0	1	1	1	1	ATP2B4	ATPase, Ca++ transporting, plasma membrane 4
hsa-miR-1323	1	0	1	1	1	1	RBL2	retinoblastoma-like 2 (p130)
hsa-miR-1323	1	0	1	1	1	1	RAB7A	RAB7A, member RAS oncogene family
hsa-miR-1323	0	0	1	0	1	1	FEZ2	fasciculation and elongation protein zeta 2 (zygin II)
hsa-miR-1323	1	0	1	1	1	1	MIER3	mesoderm induction early response 1, family member 3
hsa-miR-1323	0	0	1	1	0	0	CCDC171	coiled-coil domain containing 171
hsa-miR-1323	1	0	1	1	1	1	SGCD	sarcoglycan, delta (35kDa dystrophin-associated glycoprotein)
hsa-miR-1323	0	0	1	1	1	1	NUP54	nucleoporin 54kDa
hsa-miR-1323	1	0	1	1	1	1	ETS1	v-ets erythroblastosis virus E26 oncogene homolog 1 (avian)
hsa-miR-1323	1	0	1	1	0	0	CCDC30	coiled-coil domain containing 30
hsa-miR-1323	0	0	1	1	1	1	AIG1	androgen-induced 1
hsa-miR-1323	1	0	1	0	1	1	CLASP2	cytoplasmic linker associated protein 2
hsa-miR-1323	0	0	1	1	1	1	CRB1	crumbs homolog 1 (Drosophila)
hsa-miR-1323	1	0	1	1	1	1	SPPL3	signal peptide peptidase like 3
hsa-miR-1323	1	0	1	1	1	1	TGOLN2	trans-golgi network protein 2
hsa-miR-1323	0	0	1	1	1	1	VCAN	versican
hsa-miR-1323	1	0	1	0	1	1	GALNT4	UDP-N-acetyl-alpha-D-galactosamine:polypeptide N-acetylgalactosaminyltransferase 4 (GalNAc-T4)
hsa-miR-1323	0	0	1	1	1	1	ADH1B	alcohol dehydrogenase 1B (class I), beta polypeptide
hsa-miR-1323	0	0	1	1	1	1	MLIP	muscular LMNA-interacting protein
hsa-miR-1323	0	0	1	0	0	0	LINC00240	long intergenic non-protein coding RNA 240
hsa-miR-1323	1	0	1	1	1	1	FOXP1	forkhead box P1
hsa-miR-1323	0	0	1	1	1	1	ARMCX3	armadillo repeat containing, X-linked 3
hsa-miR-1323	0	0	1	0	0	0	OVOS	ovostatin
hsa-miR-1323	1	0	1	1	1	1	ATP6V1C1	ATPase, H+ transporting, lysosomal 42kDa, V1 subunit C1
hsa-miR-1323	1	0	1	1	1	1	PHF21A	PHD finger protein 21A
hsa-miR-1323	0	0	1	0	1	1	TYW5	tRNA-yW synthesizing protein 5
hsa-miR-1323	1	0	1	1	1	1	GPR125	G protein-coupled receptor 125
hsa-miR-1323	1	0	1	0	1	1	TMEM184B	transmembrane protein 184B
hsa-miR-1323	1	0	1	1	1	1	PAQR3	progestin and adipoQ receptor family member III
hsa-miR-1323	0	0	1	1	1	1	DOCK5	dedicator of cytokinesis 5
hsa-miR-1323	0	0	1	0	0	0	LINC00338	long intergenic non-protein coding RNA 338
hsa-miR-1323	1	0	1	1	1	1	NFIB	nuclear factor I/B
hsa-miR-1323	1	0	1	1	1	1	NAV1	neuron navigator 1
hsa-miR-1323	1	0	1	0	1	1	KLHL24	kelch-like 24 (Drosophila)
hsa-miR-1323	1	0	1	0	1	1	IGF2BP3	insulin-like growth factor 2 mRNA binding protein 3
hsa-miR-1323	1	0	1	1	1	1	C5orf24	chromosome 5 open reading frame 24
hsa-miR-1323	0	0	1	1	1	1	DAZL	deleted in azoospermia-like
hsa-miR-1323	1	0	1	1	1	1	PGAP1	post-GPI attachment to proteins 1
hsa-miR-1323	1	0	1	1	1	1	TMEM135	transmembrane protein 135
hsa-miR-1323	1	0	1	1	1	1	CACNB4	calcium channel, voltage-dependent, beta 4 subunit
hsa-miR-1323	0	0	1	1	1	1	ABCD3	ATP-binding cassette, sub-family D (ALD), member 3
hsa-miR-1323	1	0	1	1	1	1	FAM179B	family with sequence similarity 179, member B
hsa-miR-1323	1	0	1	1	1	1	BZRAP1	benzodiazapine receptor (peripheral) associated protein 1
hsa-miR-1323	1	0	1	1	1	1	CALD1	caldesmon 1
hsa-miR-1323	1	0	1	0	1	1	TBL1XR1	transducin (beta)-like 1 X-linked receptor 1
hsa-miR-1323	1	0	1	1	1	1	FAM208A	family with sequence similarity 208, member A
hsa-miR-1323	0	0	1	0	0	0	ANKRD62	ankyrin repeat domain 62
hsa-miR-1323	1	0	1	1	1	1	SGK3	serum/glucocorticoid regulated kinase family, member 3
hsa-miR-1323	0	0	1	0	1	1	STT3A	STT3, subunit of the oligosaccharyltransferase complex, homolog A (S. cerevisiae)
hsa-miR-1323	1	0	1	1	1	1	CREB3L2	cAMP responsive element binding protein 3-like 2
hsa-miR-1323	0	0	1	0	1	1	CD59	CD59 molecule, complement regulatory protein
hsa-miR-1323	1	0	1	1	1	1	MDK	midkine (neurite growth-promoting factor 2)
hsa-miR-1323	1	0	1	1	0	0	SMARCA2	SWI/SNF related, matrix associated, actin dependent regulator of chromatin, subfamily a, member 2
hsa-miR-1323	0	0	1	1	0	0	TMEM222	transmembrane protein 222
hsa-miR-1323	1	0	1	0	1	1	STX6	syntaxin 6
hsa-miR-1323	1	0	1	1	1	1	TOM1L1	target of myb1 (chicken)-like 1
hsa-miR-1323	0	0	1	1	1	1	UPRT	uracil phosphoribosyltransferase (FUR1) homolog (S. cerevisiae)
hsa-miR-1323	0	0	1	1	0	0	RNPS1	RNA binding protein S1, serine-rich domain
hsa-miR-1323	1	0	1	1	1	1	MMAB	methylmalonic aciduria (cobalamin deficiency) cblB type
hsa-miR-1323	0	0	1	0	0	0	LOC400768	uncharacterized LOC400768
hsa-miR-1323	1	0	1	1	1	1	EIF4B	eukaryotic translation initiation factor 4B
hsa-miR-1323	1	0	1	0	1	1	OLA1	Obg-like ATPase 1
hsa-miR-1323	0	0	1	1	1	1	SLCO1C1	solute carrier organic anion transporter family, member 1C1
hsa-miR-1323	0	0	1	1	0	0	PPOX	protoporphyrinogen oxidase
hsa-miR-1323	1	0	1	0	1	1	NRAS	neuroblastoma RAS viral (v-ras) oncogene homolog
hsa-miR-1323	0	0	1	1	1	1	MMADHC	methylmalonic aciduria (cobalamin deficiency) cblD type, with homocystinuria
hsa-miR-1323	1	0	1	1	1	1	DOLPP1	dolichyl pyrophosphate phosphatase 1
hsa-miR-1323	1	0	1	1	1	1	SLC35D2	solute carrier family 35, member D2
hsa-miR-1323	0	0	1	1	1	1	HSPB8	heat shock 22kDa protein 8
hsa-miR-1323	1	0	1	0	1	1	BNIP3L	BCL2/adenovirus E1B 19kDa interacting protein 3-like
hsa-miR-1323	1	0	1	1	1	1	CAAP1	caspase activity and apoptosis inhibitor 1
hsa-miR-1323	1	0	1	1	1	1	SSR1	signal sequence receptor, alpha
hsa-miR-1323	0	0	1	1	1	1	XRCC4	X-ray repair complementing defective repair in Chinese hamster cells 4
hsa-miR-1323	0	0	1	1	0	0	DNAJB2	DnaJ (Hsp40) homolog, subfamily B, member 2
hsa-miR-1323	1	0	1	1	1	1	SMARCE1	SWI/SNF related, matrix associated, actin dependent regulator of chromatin, subfamily e, member 1
hsa-miR-1323	0	0	1	1	1	1	MTCP1	mature T-cell proliferation 1
hsa-miR-1323	0	0	1	1	1	1	PLAUR	plasminogen activator, urokinase receptor
hsa-miR-1323	0	0	1	1	1	1	ZNF263	zinc finger protein 263
hsa-miR-1323	0	0	1	1	0	0	RAD54B	RAD54 homolog B (S. cerevisiae)
hsa-miR-1323	1	0	1	1	1	1	PLEKHB2	pleckstrin homology domain containing, family B (evectins) member 2
hsa-miR-1323	1	0	1	1	1	1	BAI3	brain-specific angiogenesis inhibitor 3
hsa-miR-1323	0	0	1	1	1	1	GRAP2	GRB2-related adaptor protein 2
hsa-miR-1323	0	0	1	1	0	0	TMEM183A	transmembrane protein 183A
hsa-miR-1323	0	0	1	1	1	1	STON1	stonin 1
hsa-miR-1323	1	0	1	1	1	1	PCTP	phosphatidylcholine transfer protein
hsa-miR-1323	1	0	1	1	1	1	TMEM248	transmembrane protein 248
hsa-miR-1323	0	0	1	1	1	1	XBP1	X-box binding protein 1
hsa-miR-1323	1	0	1	0	1	1	NOL8	nucleolar protein 8
hsa-miR-1323	1	0	1	1	1	1	NAP1L1	nucleosome assembly protein 1-like 1
hsa-miR-1323	1	0	1	1	1	1	ARFIP2	ADP-ribosylation factor interacting protein 2
hsa-miR-1323	1	0	1	1	1	1	TMEM245	transmembrane protein 245
hsa-miR-1323	1	0	1	1	1	1	WIPF1	WAS/WASL interacting protein family, member 1
hsa-miR-1323	0	0	1	1	1	1	UIMC1	ubiquitin interaction motif containing 1
hsa-miR-1323	0	0	1	0	0	0	LOC645513	uncharacterized LOC645513
hsa-miR-1323	0	0	1	0	1	1	SRSF5	serine/arginine-rich splicing factor 5
hsa-miR-1323	0	0	1	1	1	1	SEC11A	SEC11 homolog A (S. cerevisiae)
hsa-miR-1323	0	0	1	1	1	1	PEX19	peroxisomal biogenesis factor 19
hsa-miR-1323	0	0	1	1	1	1	SMNDC1	survival motor neuron domain containing 1
hsa-miR-1323	1	0	1	1	1	1	NT5DC1	5'-nucleotidase domain containing 1
hsa-miR-1323	0	0	1	1	1	1	ODC1	ornithine decarboxylase 1
hsa-miR-1323	1	0	1	0	1	1	NLN	neurolysin (metallopeptidase M3 family)
hsa-miR-1323	1	0	1	0	1	1	ANKH	ankylosis, progressive homolog (mouse)
hsa-miR-1323	1	0	1	1	1	1	TIMP3	TIMP metallopeptidase inhibitor 3
hsa-miR-1323	1	0	1	1	1	1	FUBP3	far upstream element (FUSE) binding protein 3
hsa-miR-1323	0	0	1	1	1	1	TMCO1	transmembrane and coiled-coil domains 1
hsa-miR-1323	0	0	1	1	0	0	YIF1A	Yip1 interacting factor homolog A (S. cerevisiae)
hsa-miR-1323	1	0	1	1	1	1	ARMC8	armadillo repeat containing 8
hsa-miR-1323	0	0	1	1	1	1	RFK	riboflavin kinase
hsa-miR-1323	0	0	1	1	1	1	FAM18B1	family with sequence similarity 18, member B1
hsa-miR-1323	1	0	1	1	1	1	RNF2	ring finger protein 2
hsa-miR-1323	1	0	1	1	1	1	HMGN2	high mobility group nucleosomal binding domain 2
hsa-miR-1323	0	0	1	1	0	0	TUBA8	tubulin, alpha 8
hsa-miR-1323	1	0	1	1	0	0	STAG3L4	stromal antigen 3-like 4
hsa-miR-1323	1	0	1	1	1	1	DNAJA2	DnaJ (Hsp40) homolog, subfamily A, member 2
hsa-miR-1323	0	0	1	1	1	1	UBE2A	ubiquitin-conjugating enzyme E2A
hsa-miR-1323	1	0	1	0	1	1	EIF2S2	eukaryotic translation initiation factor 2, subunit 2 beta, 38kDa
hsa-miR-1323	0	0	1	1	1	1	ZNF259	zinc finger protein 259
hsa-miR-1323	1	0	1	1	0	0	CCM2	cerebral cavernous malformation 2
hsa-miR-1323	1	0	1	0	1	1	CD47	CD47 molecule
hsa-miR-1323	1	0	1	1	1	1	RUNX1	runt-related transcription factor 1
hsa-miR-1323	0	0	1	1	1	1	ZNF346	zinc finger protein 346
hsa-miR-1323	0	0	1	0	0	0	LOC100132984	uncharacterized LOC100132984
hsa-miR-1323	1	0	1	1	1	1	MYT1	myelin transcription factor 1
hsa-miR-1323	1	0	1	1	1	1	MAN1C1	mannosidase, alpha, class 1C, member 1
hsa-miR-1323	0	0	1	1	1	1	NUDT21	nudix (nucleoside diphosphate linked moiety X)-type motif 21
hsa-miR-1323	0	0	1	1	1	1	LIMK2	LIM domain kinase 2
hsa-miR-1323	0	0	1	1	1	1	CIRBP	cold inducible RNA binding protein
hsa-miR-1323	0	0	1	1	1	1	ZFAND1	zinc finger, AN1-type domain 1
hsa-miR-1323	0	0	1	1	1	1	FAM118B	family with sequence similarity 118, member B
hsa-miR-1323	1	0	1	1	1	1	LGALSL	lectin, galactoside-binding-like
hsa-miR-1323	1	0	1	0	1	1	DNMT3A	DNA (cytosine-5-)-methyltransferase 3 alpha
hsa-miR-1323	1	0	1	1	1	1	TFPI	tissue factor pathway inhibitor (lipoprotein-associated coagulation inhibitor)
hsa-miR-1323	1	0	1	1	1	1	GABPB2	GA binding protein transcription factor, beta subunit 2
hsa-miR-1323	0	0	1	1	1	1	C9orf3	chromosome 9 open reading frame 3
hsa-miR-1323	1	0	1	0	1	1	KIAA0240	KIAA0240
hsa-miR-1323	0	0	1	0	0	0	FAM47E	family with sequence similarity 47, member E
hsa-miR-1323	1	0	1	1	1	1	STAG2	stromal antigen 2
hsa-miR-1323	0	0	1	1	1	1	BDP1	B double prime 1, subunit of RNA polymerase III transcription initiation factor IIIB
hsa-miR-1323	0	0	1	0	0	0	LOC731789	uncharacterized LOC731789
hsa-miR-1323	1	0	1	1	1	1	PTPRG	protein tyrosine phosphatase, receptor type, G
hsa-miR-1323	0	0	1	1	1	1	ATG5	autophagy related 5
hsa-miR-1323	0	0	1	0	0	0	LINC00661	long intergenic non-protein coding RNA 661
hsa-miR-1323	1	0	1	0	1	1	MEGF10	multiple EGF-like-domains 10
hsa-miR-1323	1	0	1	1	1	1	KIAA2018	KIAA2018
hsa-miR-1323	1	0	1	0	1	1	SLC7A6	solute carrier family 7 (amino acid transporter light chain, y+L system), member 6
hsa-miR-1323	0	0	1	0	1	1	USP10	ubiquitin specific peptidase 10
hsa-miR-1323	1	0	1	0	1	1	XRN1	5'-3' exoribonuclease 1
hsa-miR-1323	1	0	1	0	1	1	OSBPL8	oxysterol binding protein-like 8
hsa-miR-1323	0	0	1	0	1	1	HDAC9	histone deacetylase 9
hsa-miR-1323	1	0	1	1	1	1	SLC39A10	solute carrier family 39 (zinc transporter), member 10
hsa-miR-1323	1	0	1	1	1	1	ZFHX3	zinc finger homeobox 3
hsa-miR-1323	1	0	1	1	1	1	PI15	peptidase inhibitor 15
hsa-miR-1323	1	0	1	1	1	1	SEC14L1	SEC14-like 1 (S. cerevisiae)
hsa-miR-1323	1	0	1	1	1	1	RBPMS	RNA binding protein with multiple splicing
hsa-miR-1323	0	0	1	1	1	1	PTGS1	prostaglandin-endoperoxide synthase 1 (prostaglandin G/H synthase and cyclooxygenase)
hsa-miR-1323	1	0	1	1	0	0	DPY19L1	dpy-19-like 1 (C. elegans)
hsa-miR-1323	1	0	1	1	1	1	QKI	QKI, KH domain containing, RNA binding
hsa-miR-1323	0	0	1	1	1	1	EIF1AY	eukaryotic translation initiation factor 1A, Y-linked
hsa-miR-1323	1	0	1	1	1	1	SLC4A8	solute carrier family 4, sodium bicarbonate cotransporter, member 8
hsa-miR-1323	0	0	1	1	1	1	MORC4	MORC family CW-type zinc finger 4
hsa-miR-1323	0	0	1	1	1	1	ALDH3B1	aldehyde dehydrogenase 3 family, member B1
hsa-miR-1323	0	0	1	1	1	1	ADPRH	ADP-ribosylarginine hydrolase
hsa-miR-1323	1	0	1	1	1	1	AFF1	AF4/FMR2 family, member 1
hsa-miR-1323	1	0	1	1	1	1	RALBP1	ralA binding protein 1
hsa-miR-1323	1	0	1	1	1	1	CCNG2	cyclin G2
hsa-miR-1323	1	0	1	0	1	1	YES1	v-yes-1 Yamaguchi sarcoma viral oncogene homolog 1
hsa-miR-1323	1	0	1	1	1	1	IGF1	insulin-like growth factor 1 (somatomedin C)
hsa-miR-1323	0	0	1	1	1	1	COL14A1	collagen, type XIV, alpha 1
hsa-miR-1323	0	0	1	1	0	0	CD40LG	CD40 ligand
hsa-miR-1323	1	0	1	1	1	1	COL4A4	collagen, type IV, alpha 4
hsa-miR-1323	1	0	1	0	1	1	SLC26A2	solute carrier family 26 (sulfate transporter), member 2
hsa-miR-1323	1	0	1	1	1	1	ESR1	estrogen receptor 1
hsa-miR-1323	1	0	1	1	1	1	F13A1	coagulation factor XIII, A1 polypeptide
hsa-miR-1323	0	0	1	1	0	0	FSHR	follicle stimulating hormone receptor
hsa-miR-1323	1	0	1	1	1	1	GALC	galactosylceramidase
hsa-miR-1323	1	0	1	1	1	1	GJA1	gap junction protein, alpha 1, 43kDa
hsa-miR-1323	1	0	1	0	1	1	GLI3	GLI family zinc finger 3
hsa-miR-1323	1	0	1	1	1	1	TBX5	T-box 5
hsa-miR-1323	0	0	1	1	1	1	HPRT1	hypoxanthine phosphoribosyltransferase 1
hsa-miR-1323	1	0	1	1	1	1	JAG1	jagged 1
hsa-miR-1323	1	0	1	0	1	1	KIT	v-kit Hardy-Zuckerman 4 feline sarcoma viral oncogene homolog
hsa-miR-1323	1	0	1	0	1	1	SGCB	sarcoglycan, beta (43kDa dystrophin-associated glycoprotein)
hsa-miR-1323	0	0	1	1	1	1	LPL	lipoprotein lipase
hsa-miR-1323	0	0	1	1	1	1	MAOA	monoamine oxidase A
hsa-miR-1323	1	0	1	1	1	1	MITF	microphthalmia-associated transcription factor
hsa-miR-1323	0	0	1	1	1	1	PEX7	peroxisomal biogenesis factor 7
hsa-miR-1323	1	0	1	0	1	1	PTEN	phosphatase and tensin homolog
hsa-miR-1323	0	0	1	1	1	1	RPGR	retinitis pigmentosa GTPase regulator
hsa-miR-1323	1	0	1	1	1	1	ATXN1	ataxin 1
hsa-miR-1323	0	0	1	1	1	1	STS	steroid sulfatase (microsomal), isozyme S
hsa-miR-1323	1	0	1	0	1	1	CYBB	cytochrome b-245, beta polypeptide
hsa-miR-1323	1	0	1	0	1	1	PAFAH1B1	platelet-activating factor acetylhydrolase 1b, regulatory subunit 1 (45kDa)
hsa-miR-1323	1	0	1	0	1	1	PCSK1	proprotein convertase subtilisin/kexin type 1
hsa-miR-1323	1	0	1	1	1	1	SLC26A4	solute carrier family 26, member 4
hsa-miR-1323	0	0	1	1	1	1	PECAM1	platelet/endothelial cell adhesion molecule 1
hsa-miR-1323	1	0	1	0	1	1	RAG1	recombination activating gene 1
hsa-miR-1323	1	0	1	1	1	1	HNF1B	HNF1 homeobox B
hsa-miR-1323	1	0	1	1	1	1	ATRX	alpha thalassemia/mental retardation syndrome X-linked
hsa-miR-1323	0	0	1	1	0	0	SAG	S-antigen; retina and pineal gland (arrestin)
hsa-miR-1323	0	0	1	1	1	1	CRX	cone-rod homeobox
hsa-miR-1323	1	0	1	1	1	1	CR1	complement component (3b/4b) receptor 1 (Knops blood group)
hsa-miR-1323	1	0	1	1	1	1	IL1A	interleukin 1, alpha
hsa-miR-1323	0	0	1	1	1	1	IL6	interleukin 6 (interferon, beta 2)
hsa-miR-1323	0	0	1	1	1	1	IGF2	insulin-like growth factor 2 (somatomedin A)
hsa-miR-1323	0	0	1	1	1	1	SELL	selectin L
hsa-miR-1323	1	0	1	1	1	1	DIO2	deiodinase, iodothyronine, type II
hsa-miR-1323	0	0	1	1	1	1	EPO	erythropoietin
hsa-miR-1323	1	0	1	1	1	1	GABRB3	gamma-aminobutyric acid (GABA) A receptor, beta 3
hsa-miR-1323	1	0	1	1	1	1	GRM7	glutamate receptor, metabotropic 7
hsa-miR-1323	1	0	1	1	1	1	HTR4	5-hydroxytryptamine (serotonin) receptor 4, G protein-coupled
hsa-miR-1323	0	0	1	1	1	1	IL12A	interleukin 12A (natural killer cell stimulatory factor 1, cytotoxic lymphocyte maturation factor 1, p35)
hsa-miR-1323	0	0	1	1	1	1	NQO1	NAD(P)H dehydrogenase, quinone 1
hsa-miR-1323	1	0	1	1	1	1	PPP3R1	protein phosphatase 3, regulatory subunit B, alpha
hsa-miR-1323	1	0	1	1	1	1	PTGER2	prostaglandin E receptor 2 (subtype EP2), 53kDa
hsa-miR-1323	1	0	1	1	1	1	RARA	retinoic acid receptor, alpha
hsa-miR-1323	1	0	1	1	1	1	RARB	retinoic acid receptor, beta
hsa-miR-1323	1	0	1	1	1	1	REEP3	receptor accessory protein 3
hsa-miR-1323	1	0	1	0	1	1	SMAD5	SMAD family member 5
hsa-miR-1323	1	0	1	0	1	1	UBE2W	ubiquitin-conjugating enzyme E2W (putative)
hsa-miR-1323	1	0	1	1	1	1	TPD52L3	tumor protein D52-like 3
hsa-miR-1323	1	0	1	0	1	1	PPARA	peroxisome proliferator-activated receptor alpha
hsa-miR-1323	0	0	1	0	0	0	KLK2	kallikrein-related peptidase 2
hsa-miR-1323	1	0	1	1	1	1	LCLAT1	lysocardiolipin acyltransferase 1
hsa-miR-1323	1	0	1	1	1	1	GATA3	GATA binding protein 3
hsa-miR-1323	1	0	1	1	1	1	LEPR	leptin receptor
hsa-miR-1323	1	0	1	1	1	1	KLHL31	kelch-like 31 (Drosophila)
hsa-miR-1323	1	0	1	1	1	1	HNRNPD	heterogeneous nuclear ribonucleoprotein D (AU-rich element RNA binding protein 1, 37kDa)
hsa-miR-1323	0	0	1	1	1	1	CCDC144NL	coiled-coil domain containing 144 family, N-terminal like
hsa-miR-1323	0	0	1	1	1	1	AGMO	alkylglycerol monooxygenase
hsa-miR-1323	0	0	1	0	1	1	SPDYE3	speedy homolog E3 (Xenopus laevis)
hsa-miR-1323	0	0	1	1	1	1	CLEC2D	C-type lectin domain family 2, member D
hsa-miR-1323	1	0	1	0	1	1	LRRC55	leucine rich repeat containing 55
hsa-miR-1323	0	0	1	1	1	1	FRG2	FSHD region gene 2
hsa-miR-1323	1	0	1	1	0	0	MAGED1	melanoma antigen family D, 1
hsa-miR-1323	1	0	1	0	1	1	YPEL2	yippee-like 2 (Drosophila)
hsa-miR-1323	1	0	1	1	1	1	PLCXD3	phosphatidylinositol-specific phospholipase C, X domain containing 3
hsa-miR-1323	1	0	1	0	1	1	IP6K1	inositol hexakisphosphate kinase 1
hsa-miR-1323	0	0	1	1	1	1	MAPKAP1	mitogen-activated protein kinase associated protein 1
hsa-miR-1323	1	0	1	0	1	1	GOSR1	golgi SNAP receptor complex member 1
hsa-miR-1323	1	0	1	1	1	1	SPOP	speckle-type POZ protein
hsa-miR-1323	1	0	1	1	1	1	BRWD1	bromodomain and WD repeat domain containing 1
hsa-miR-1323	1	0	1	1	1	1	EI24	etoposide induced 2.4 mRNA
hsa-miR-1323	1	0	1	1	1	1	LMBRD2	LMBR1 domain containing 2
hsa-miR-1323	1	0	1	0	1	1	SS18	synovial sarcoma translocation, chromosome 18
hsa-miR-1323	0	0	1	1	1	1	FAM154B	family with sequence similarity 154, member B
hsa-miR-1323	1	0	1	0	1	1	C18orf25	chromosome 18 open reading frame 25
hsa-miR-1323	1	0	1	1	1	1	BCAP29	B-cell receptor-associated protein 29
hsa-miR-1323	1	0	1	0	1	1	KIAA2022	KIAA2022
hsa-miR-1323	0	0	1	1	1	1	CXCR4	chemokine (C-X-C motif) receptor 4
hsa-miR-1323	1	0	1	1	1	1	NUPL1	nucleoporin like 1
hsa-miR-1323	1	0	1	1	1	1	LPHN1	latrophilin 1
hsa-miR-1323	1	0	1	1	1	1	FNIP1	folliculin interacting protein 1
hsa-miR-1323	0	0	1	1	1	1	GEMIN2	gem (nuclear organelle) associated protein 2
hsa-miR-1323	0	0	1	1	1	1	ZCCHC11	zinc finger, CCHC domain containing 11
hsa-miR-1323	0	0	1	0	1	1	ZNF648	zinc finger protein 648
hsa-miR-1323	1	0	1	0	1	1	FAM102B	family with sequence similarity 102, member B
hsa-miR-1323	1	0	1	0	1	1	ZC3H12B	zinc finger CCCH-type containing 12B
hsa-miR-1323	1	0	1	0	1	1	MTX3	metaxin 3
hsa-miR-1323	0	0	1	1	1	1	ERCC6L2	excision repair cross-complementing rodent repair deficiency, complementation group 6-like 2
hsa-miR-1323	1	0	1	0	1	1	C6orf222	chromosome 6 open reading frame 222
hsa-miR-1323	1	0	1	1	1	1	BCL2L15	BCL2-like 15
hsa-miR-1323	0	0	1	1	1	1	ZMAT1	zinc finger, matrin-type 1
hsa-miR-1323	1	0	1	0	1	1	CREB5	cAMP responsive element binding protein 5
hsa-miR-1323	1	0	1	0	1	1	FAM125B	family with sequence similarity 125, member B
hsa-miR-1323	0	0	1	0	1	1	C9orf106	chromosome 9 open reading frame 106
hsa-miR-1323	1	0	1	1	1	1	SLC25A53	solute carrier family 25, member 53
hsa-miR-1323	0	0	1	1	1	1	SPIN4	spindlin family, member 4
hsa-miR-1323	1	0	1	1	1	1	PABPC1L2A	poly(A) binding protein, cytoplasmic 1-like 2A
hsa-miR-1323	1	0	1	0	1	1	ZKSCAN2	zinc finger with KRAB and SCAN domains 2
hsa-miR-1323	1	0	1	1	1	1	SORCS1	sortilin-related VPS10 domain containing receptor 1
hsa-miR-1323	0	0	1	1	1	1	PAGE5	P antigen family, member 5 (prostate associated)
hsa-miR-1323	1	0	1	0	1	1	FIGNL2	fidgetin-like 2
hsa-miR-1323	1	0	1	1	1	1	NLE1	notchless homolog 1 (Drosophila)
hsa-miR-1323	1	0	1	1	1	1	RUNX2	runt-related transcription factor 2
hsa-miR-1323	1	0	1	1	1	1	PHF6	PHD finger protein 6
hsa-miR-1323	1	0	1	1	1	1	TMCC1	transmembrane and coiled-coil domain family 1
hsa-miR-1323	0	0	1	1	1	1	USP1	ubiquitin specific peptidase 1
hsa-miR-1323	0	0	1	1	1	1	BTBD11	BTB (POZ) domain containing 11
hsa-miR-1323	1	0	1	1	1	1	ZHX1	zinc fingers and homeoboxes 1
hsa-miR-1323	1	0	1	1	1	1	VMA21	VMA21 vacuolar H+-ATPase homolog (S. cerevisiae)
hsa-miR-1323	1	0	1	1	1	1	NTRK2	neurotrophic tyrosine kinase, receptor, type 2
hsa-miR-1323	1	0	1	1	1	1	SERBP1	SERPINE1 mRNA binding protein 1
hsa-miR-1323	0	0	1	1	1	1	MURC	muscle-related coiled-coil protein
hsa-miR-1323	0	0	1	1	1	1	NPIPL1	nuclear pore complex interacting protein-like 1
hsa-miR-1323	0	0	1	1	1	1	ZNF187	zinc finger protein 187
hsa-miR-1323	1	0	1	1	1	1	ABCC5	ATP-binding cassette, sub-family C (CFTR/MRP), member 5
hsa-miR-1323	1	0	1	0	1	1	RGAG4	retrotransposon gag domain containing 4
hsa-miR-1323	1	0	1	1	1	1	CANX	calnexin
hsa-miR-1323	1	0	1	0	1	1	BCL7A	B-cell CLL/lymphoma 7A
hsa-miR-1323	1	0	1	0	1	1	TNRC6B	trinucleotide repeat containing 6B
hsa-miR-1323	1	0	1	1	1	1	FNBP1L	formin binding protein 1-like
hsa-miR-1323	0	0	1	0	0	0	CSN1S1	casein alpha s1
hsa-miR-1323	1	0	1	1	1	1	AFF3	AF4/FMR2 family, member 3
hsa-miR-1323	0	0	1	1	0	0	CES1	carboxylesterase 1
hsa-miR-1323	1	0	1	1	1	1	TPD52	tumor protein D52
hsa-miR-1323	1	0	1	0	1	1	RAB12	RAB12, member RAS oncogene family
hsa-miR-1323	1	0	1	1	1	1	VEGFA	vascular endothelial growth factor A
hsa-miR-1323	1	0	1	1	1	1	FAM108B1	family with sequence similarity 108, member B1
hsa-miR-1323	0	0	1	0	1	1	C6orf120	chromosome 6 open reading frame 120
hsa-miR-1323	1	0	1	1	1	1	RGS7BP	regulator of G-protein signaling 7 binding protein
hsa-miR-1323	0	0	1	1	1	1	ATF3	activating transcription factor 3
hsa-miR-1323	1	0	1	0	1	1	MSRB3	methionine sulfoxide reductase B3
hsa-miR-1323	0	0	1	1	1	1	LRRC17	leucine rich repeat containing 17
hsa-miR-1323	1	0	1	1	1	1	MAF	v-maf musculoaponeurotic fibrosarcoma oncogene homolog (avian)
hsa-miR-1323	1	0	1	1	1	1	CSNK1G3	casein kinase 1, gamma 3
hsa-miR-1323	1	0	1	1	1	1	UBE2V1	ubiquitin-conjugating enzyme E2 variant 1
hsa-miR-1323	0	0	1	1	1	1	PLGLB1	plasminogen-like B1
hsa-miR-1323	0	0	1	1	1	1	HNRNPH2	heterogeneous nuclear ribonucleoprotein H2 (H')
hsa-miR-1323	1	0	1	0	1	1	NPNT	nephronectin
hsa-miR-1323	1	0	1	1	1	1	AMD1	adenosylmethionine decarboxylase 1
hsa-miR-1323	1	0	1	1	1	1	SAR1B	SAR1 homolog B (S. cerevisiae)
hsa-miR-1323	1	0	1	1	0	0	MTUS2	microtubule associated tumor suppressor candidate 2
hsa-miR-1323	0	0	1	1	1	1	FAM134B	family with sequence similarity 134, member B
hsa-miR-1323	1	0	1	0	1	1	RYR2	ryanodine receptor 2 (cardiac)
hsa-miR-1323	1	0	1	1	1	1	SCN1B	sodium channel, voltage-gated, type I, beta subunit
hsa-miR-1323	1	0	1	0	1	1	SCML1	sex comb on midleg-like 1 (Drosophila)
hsa-miR-1323	0	0	1	1	1	1	CTLA4	cytotoxic T-lymphocyte-associated protein 4
hsa-miR-1323	1	0	1	0	1	1	CDC42SE1	CDC42 small effector 1
hsa-miR-1323	0	0	1	1	1	1	HEPACAM2	HEPACAM family member 2
hsa-miR-1323	1	0	1	1	1	1	ELMO1	engulfment and cell motility 1
hsa-miR-1323	0	0	1	1	1	1	SKA1	spindle and kinetochore associated complex subunit 1
hsa-miR-1323	1	0	1	1	1	1	AP1S3	adaptor-related protein complex 1, sigma 3 subunit
hsa-miR-1323	1	0	1	0	1	1	USP9X	ubiquitin specific peptidase 9, X-linked
hsa-miR-1323	1	0	1	0	1	1	CREBZF	CREB/ATF bZIP transcription factor
hsa-miR-1323	1	0	1	1	1	1	SPTSSB	serine palmitoyltransferase, small subunit B
hsa-miR-1323	0	0	1	0	1	1	OPALIN	oligodendrocytic myelin paranodal and inner loop protein
hsa-miR-1323	0	0	1	1	1	1	MYH11	myosin, heavy chain 11, smooth muscle
hsa-miR-1323	0	0	1	0	1	1	SCN3B	sodium channel, voltage-gated, type III, beta subunit
hsa-miR-1323	0	0	1	1	1	1	SPOCK3	sparc/osteonectin, cwcv and kazal-like domains proteoglycan (testican) 3
hsa-miR-1323	0	0	1	0	1	1	ABCE1	ATP-binding cassette, sub-family E (OABP), member 1
hsa-miR-1323	1	0	1	1	1	1	CYLD	cylindromatosis (turban tumor syndrome)
hsa-miR-1323	1	0	1	1	1	1	GLIS3	GLIS family zinc finger 3
hsa-miR-1323	1	0	1	1	1	1	RUFY2	RUN and FYVE domain containing 2
hsa-miR-1323	0	0	1	1	1	1	MST4	serine/threonine protein kinase MST4
hsa-miR-1323	1	0	1	1	1	1	ZNF706	zinc finger protein 706
hsa-miR-1323	1	0	1	1	1	1	SLC9A6	solute carrier family 9, subfamily A (NHE6, cation proton antiporter 6), member 6
hsa-miR-1323	1	0	1	1	1	1	GLRA3	glycine receptor, alpha 3
hsa-miR-1323	1	0	1	1	1	1	NSL1	NSL1, MIND kinetochore complex component, homolog (S. cerevisiae)
hsa-miR-1323	1	0	1	1	1	1	FRS2	fibroblast growth factor receptor substrate 2
hsa-miR-1323	1	0	1	1	1	1	CRTC3	CREB regulated transcription coactivator 3
hsa-miR-1323	1	0	1	1	1	1	ERBB4	v-erb-a erythroblastic leukemia viral oncogene homolog 4 (avian)
hsa-miR-1323	1	0	1	1	1	1	KDM5A	lysine (K)-specific demethylase 5A
hsa-miR-1323	1	0	1	0	1	1	SRGAP2	SLIT-ROBO Rho GTPase activating protein 2
hsa-miR-1323	1	0	1	0	1	1	TMEM237	transmembrane protein 237
hsa-miR-1323	1	0	1	1	1	1	NET1	neuroepithelial cell transforming 1
hsa-miR-1323	0	0	1	1	1	1	RCC1	regulator of chromosome condensation 1
hsa-miR-1323	1	0	1	1	1	1	HIPK3	homeodomain interacting protein kinase 3
hsa-miR-1323	0	0	1	0	1	1	SSTR1	somatostatin receptor 1
hsa-miR-1323	0	0	1	1	1	1	SSTR2	somatostatin receptor 2
hsa-miR-1323	1	0	1	1	1	1	UBTF	upstream binding transcription factor, RNA polymerase I
hsa-miR-1323	1	0	1	1	1	1	METTL9	methyltransferase like 9
hsa-miR-1323	1	0	1	1	1	1	HS6ST2	heparan sulfate 6-O-sulfotransferase 2
hsa-miR-1323	1	0	1	1	1	1	PDE11A	phosphodiesterase 11A
hsa-miR-1323	1	0	1	1	1	1	SREK1	splicing regulatory glutamine/lysine-rich protein 1
hsa-miR-1323	1	0	1	1	1	1	PHF16	PHD finger protein 16
hsa-miR-1323	1	0	1	1	1	1	PRR3	proline rich 3
hsa-miR-1323	1	0	1	0	1	1	UBXN2B	UBX domain protein 2B
hsa-miR-1323	0	0	1	1	0	0	FAM127A	family with sequence similarity 127, member A
hsa-miR-1323	1	0	1	0	0	0	FAM127B	family with sequence similarity 127, member B
hsa-miR-1323	1	0	1	0	1	1	FAM127C	family with sequence similarity 127, member C
hsa-miR-1323	1	0	1	1	1	1	UBN1	ubinuclein 1
hsa-miR-1323	1	0	1	1	1	1	DACT1	dapper, antagonist of beta-catenin, homolog 1 (Xenopus laevis)
hsa-miR-1323	0	0	1	0	0	0	TMEM183B	transmembrane protein 183B
hsa-miR-1323	1	0	1	1	1	1	LDB3	LIM domain binding 3
hsa-miR-1323	1	0	1	1	1	1	SHANK3	SH3 and multiple ankyrin repeat domains 3
hsa-miR-1323	1	0	1	0	1	1	THSD7B	thrombospondin, type I, domain containing 7B
hsa-miR-1323	1	0	1	0	1	1	CCDC85A	coiled-coil domain containing 85A
hsa-miR-1323	0	0	1	1	1	1	IGSF5	immunoglobulin superfamily, member 5
hsa-miR-1323	1	0	1	0	1	1	MEGF9	multiple EGF-like-domains 9
hsa-miR-1323	1	0	1	1	1	1	UNC119B	unc-119 homolog B (C. elegans)
hsa-miR-1323	1	0	1	1	1	1	MGA	MAX gene associated
hsa-miR-1323	1	0	1	1	1	1	REPS2	RALBP1 associated Eps domain containing 2
hsa-miR-1323	0	0	1	1	0	0	PRKDC	protein kinase, DNA-activated, catalytic polypeptide
hsa-miR-1323	1	0	1	0	1	1	PDE5A	phosphodiesterase 5A, cGMP-specific
hsa-miR-1323	1	0	1	1	0	0	ASIC2	acid-sensing (proton-gated) ion channel 2
hsa-miR-1323	1	0	1	1	1	1	ADAM10	ADAM metallopeptidase domain 10
hsa-miR-1323	0	0	1	1	1	1	ADSS	adenylosuccinate synthase
hsa-miR-1323	1	0	1	0	1	1	XIAP	X-linked inhibitor of apoptosis
hsa-miR-1323	1	0	1	0	1	1	BMPR2	bone morphogenetic protein receptor, type II (serine/threonine kinase)
hsa-miR-1323	1	0	1	1	1	1	CAMK2D	calcium/calmodulin-dependent protein kinase II delta
hsa-miR-1323	0	0	1	1	1	1	CDC5L	CDC5 cell division cycle 5-like (S. pombe)
hsa-miR-1323	1	0	1	0	1	1	CDK6	cyclin-dependent kinase 6
hsa-miR-1323	1	0	1	1	1	1	CDS1	CDP-diacylglycerol synthase (phosphatidate cytidylyltransferase) 1
hsa-miR-1323	1	0	1	1	1	1	CHD2	chromodomain helicase DNA binding protein 2
hsa-miR-1323	0	0	1	1	1	1	CHUK	conserved helix-loop-helix ubiquitous kinase
hsa-miR-1323	1	0	1	0	1	1	CPD	carboxypeptidase D
hsa-miR-1323	0	0	1	1	1	1	CXADR	coxsackie virus and adenovirus receptor
hsa-miR-1323	1	0	1	1	1	1	DYRK1A	dual-specificity tyrosine-(Y)-phosphorylation regulated kinase 1A
hsa-miR-1323	1	0	1	1	1	1	ELAVL1	ELAV (embryonic lethal, abnormal vision, Drosophila)-like 1 (Hu antigen R)
hsa-miR-1323	1	0	1	0	1	1	ELAVL3	ELAV (embryonic lethal, abnormal vision, Drosophila)-like 3 (Hu antigen C)
hsa-miR-1323	0	0	1	0	1	1	EMP1	epithelial membrane protein 1
hsa-miR-1323	1	0	1	1	1	1	GPC4	glypican 4
hsa-miR-1323	1	0	1	1	1	1	FOXF2	forkhead box F2
hsa-miR-1323	0	0	1	1	1	1	FRZB	frizzled-related protein
hsa-miR-1323	1	0	1	1	1	1	GCNT1	glucosaminyl (N-acetyl) transferase 1, core 2
hsa-miR-1323	0	0	1	1	0	0	HSPB2	heat shock 27kDa protein 2
hsa-miR-1323	0	0	1	1	1	1	PARP1	poly (ADP-ribose) polymerase 1
hsa-miR-1323	1	0	1	1	1	1	AHNAK	AHNAK nucleoprotein
hsa-miR-1323	1	0	1	1	1	1	AHR	aryl hydrocarbon receptor
hsa-miR-1323	0	0	1	1	1	1	AKR1B1	aldo-keto reductase family 1, member B1 (aldose reductase)
hsa-miR-1323	1	0	1	0	1	1	ARCN1	archain 1
hsa-miR-1323	1	0	1	0	1	1	ARNT	aryl hydrocarbon receptor nuclear translocator
hsa-miR-1323	1	0	1	1	1	1	ATP6V1A	ATPase, H+ transporting, lysosomal 70kDa, V1 subunit A
hsa-miR-1323	0	0	1	1	0	0	BICD1	bicaudal D homolog 1 (Drosophila)
hsa-miR-1323	1	0	1	1	1	1	KLF5	Kruppel-like factor 5 (intestinal)
hsa-miR-1323	1	0	1	1	1	1	CBFB	core-binding factor, beta subunit
hsa-miR-1323	1	0	1	1	1	1	CDK2	cyclin-dependent kinase 2
hsa-miR-1323	0	0	1	1	1	1	CKS2	CDC28 protein kinase regulatory subunit 2
hsa-miR-1323	1	0	1	1	1	1	CLCN4	chloride channel, voltage-sensitive 4
hsa-miR-1323	1	0	1	1	1	1	COL4A6	collagen, type IV, alpha 6
hsa-miR-1323	1	0	1	0	1	1	COL19A1	collagen, type XIX, alpha 1
hsa-miR-1323	0	0	1	1	1	1	CPS1	carbamoyl-phosphate synthase 1, mitochondrial
hsa-miR-1323	1	0	1	1	1	1	CREM	cAMP responsive element modulator
hsa-miR-1323	1	0	1	1	1	1	CSNK1D	casein kinase 1, delta
hsa-miR-1323	1	0	1	1	1	1	CSNK2A1	casein kinase 2, alpha 1 polypeptide
hsa-miR-1323	0	0	1	1	1	1	GADD45A	growth arrest and DNA-damage-inducible, alpha
hsa-miR-1323	1	0	1	1	1	1	DR1	down-regulator of transcription 1, TBP-binding (negative cofactor 2)
hsa-miR-1323	1	0	1	1	1	1	FBN2	fibrillin 2
hsa-miR-1323	1	0	1	1	1	1	FKBP4	FK506 binding protein 4, 59kDa
hsa-miR-1323	1	0	1	1	1	1	GAB1	GRB2-associated binding protein 1
hsa-miR-1323	1	0	1	1	1	1	GAS1	growth arrest-specific 1
hsa-miR-1323	1	0	1	1	0	0	GRK6	G protein-coupled receptor kinase 6
hsa-miR-1323	1	0	1	1	1	1	GRB2	growth factor receptor-bound protein 2
hsa-miR-1323	0	0	1	1	1	1	HMGCS1	3-hydroxy-3-methylglutaryl-CoA synthase 1 (soluble)
hsa-miR-1323	1	0	1	1	1	1	HNRNPA2B1	heterogeneous nuclear ribonucleoprotein A2/B1
hsa-miR-1323	1	0	1	1	1	1	HSPA4	heat shock 70kDa protein 4
hsa-miR-1323	0	0	1	0	1	1	ITGAV	integrin, alpha V
hsa-miR-1323	0	0	1	1	1	1	ITGB1	integrin, beta 1 (fibronectin receptor, beta polypeptide, antigen CD29 includes MDF2, MSK12)
hsa-miR-1323	1	0	1	1	1	1	ITGB8	integrin, beta 8
hsa-miR-1323	1	0	1	1	1	1	KCNA3	potassium voltage-gated channel, shaker-related subfamily, member 3
hsa-miR-1323	1	0	1	0	1	1	KIF3C	kinesin family member 3C
hsa-miR-1323	1	0	1	1	1	1	KPNB1	karyopherin (importin) beta 1
hsa-miR-1323	1	0	1	1	1	1	KPNA3	karyopherin alpha 3 (importin alpha 4)
hsa-miR-1323	1	0	1	1	1	1	KPNA4	karyopherin alpha 4 (importin alpha 3)
hsa-miR-1323	0	0	1	1	0	0	LALBA	lactalbumin, alpha-
hsa-miR-1323	1	0	1	1	1	1	LY75	lymphocyte antigen 75
hsa-miR-1323	1	0	1	1	1	1	MAN2A1	mannosidase, alpha, class 2A, member 1
hsa-miR-1323	0	0	1	1	1	1	MRC1	mannose receptor, C type 1
hsa-miR-1323	0	0	1	1	1	1	MTAP	methylthioadenosine phosphorylase
hsa-miR-1323	1	0	1	1	1	1	PPP1R12B	protein phosphatase 1, regulatory subunit 12B
hsa-miR-1323	1	0	1	1	1	1	OLR1	oxidized low density lipoprotein (lectin-like) receptor 1
hsa-miR-1323	0	0	1	0	1	1	OPHN1	oligophrenin 1
hsa-miR-1323	1	0	1	0	1	1	PAPPA	pregnancy-associated plasma protein A, pappalysin 1
hsa-miR-1323	1	0	1	1	1	1	PAWR	PRKC, apoptosis, WT1, regulator
hsa-miR-1323	1	0	1	0	1	1	PCDHGC3	protocadherin gamma subfamily C, 3
hsa-miR-1323	1	0	1	1	1	1	PCDH8	protocadherin 8
hsa-miR-1323	0	0	1	1	1	1	PCK1	phosphoenolpyruvate carboxykinase 1 (soluble)
hsa-miR-1323	0	0	1	1	1	1	PDE6D	phosphodiesterase 6D, cGMP-specific, rod, delta
hsa-miR-1323	0	0	1	1	0	0	PDGFRB	platelet-derived growth factor receptor, beta polypeptide
hsa-miR-1323	0	0	1	1	1	1	SERPINB8	serpin peptidase inhibitor, clade B (ovalbumin), member 8
hsa-miR-1323	0	0	1	1	1	1	PIM1	pim-1 oncogene
hsa-miR-1323	1	0	1	1	1	1	PLCG1	phospholipase C, gamma 1
hsa-miR-1323	0	0	1	1	1	1	PLGLB2	plasminogen-like B2
hsa-miR-1323	0	0	1	1	1	1	PPP1R3A	protein phosphatase 1, regulatory subunit 3A
hsa-miR-1323	1	0	1	1	1	1	PPP2CA	protein phosphatase 2, catalytic subunit, alpha isozyme
hsa-miR-1323	0	0	1	1	1	1	PRKACA	protein kinase, cAMP-dependent, catalytic, alpha
hsa-miR-1323	1	0	1	1	1	1	PRKD1	protein kinase D1
hsa-miR-1323	1	0	1	0	1	1	MAPK4	mitogen-activated protein kinase 4
hsa-miR-1323	1	0	1	1	1	1	MAPK6	mitogen-activated protein kinase 6
hsa-miR-1323	0	0	1	1	1	1	MAP2K1	mitogen-activated protein kinase kinase 1
hsa-miR-1323	1	0	1	1	1	1	PTPN2	protein tyrosine phosphatase, non-receptor type 2
hsa-miR-1323	1	0	1	1	1	1	PTPN9	protein tyrosine phosphatase, non-receptor type 9
hsa-miR-1323	0	0	1	1	1	1	PTPN12	protein tyrosine phosphatase, non-receptor type 12
hsa-miR-1323	1	0	1	1	1	1	PTPRJ	protein tyrosine phosphatase, receptor type, J
hsa-miR-1323	1	0	1	1	1	1	RAD23B	RAD23 homolog B (S. cerevisiae)
hsa-miR-1323	1	0	1	1	1	1	RASA1	RAS p21 protein activator (GTPase activating protein) 1
hsa-miR-1323	1	0	1	1	1	1	ARID4A	AT rich interactive domain 4A (RBP1-like)
hsa-miR-1323	0	0	1	1	0	0	RDBP	RD RNA binding protein
hsa-miR-1323	1	0	1	1	1	1	RIT2	Ras-like without CAAX 2
hsa-miR-1323	1	0	1	0	1	1	SORT1	sortilin 1
hsa-miR-1323	0	0	1	1	1	1	CXCL6	chemokine (C-X-C motif) ligand 6 (granulocyte chemotactic protein 2)
hsa-miR-1323	0	0	1	0	1	1	CXCL5	chemokine (C-X-C motif) ligand 5
hsa-miR-1323	0	0	1	1	1	1	SDC2	syndecan 2
hsa-miR-1323	1	0	1	1	1	1	SFRP4	secreted frizzled-related protein 4
hsa-miR-1323	1	0	1	1	1	1	SRSF3	serine/arginine-rich splicing factor 3
hsa-miR-1323	1	0	1	1	1	1	SKI	v-ski sarcoma viral oncogene homolog (avian)
hsa-miR-1323	1	0	1	1	1	1	SNAI2	snail homolog 2 (Drosophila)
hsa-miR-1323	0	0	1	1	1	1	SMARCA1	SWI/SNF related, matrix associated, actin dependent regulator of chromatin, subfamily a, member 1
hsa-miR-1323	1	0	1	1	1	1	SMARCD1	SWI/SNF related, matrix associated, actin dependent regulator of chromatin, subfamily d, member 1
hsa-miR-1323	0	0	1	1	0	0	SNRPA1	small nuclear ribonucleoprotein polypeptide A'
hsa-miR-1323	0	0	1	1	0	0	SNRPC	small nuclear ribonucleoprotein polypeptide C
hsa-miR-1323	0	0	1	1	1	1	UAP1	UDP-N-acteylglucosamine pyrophosphorylase 1
hsa-miR-1323	1	0	1	1	1	1	SPAM1	sperm adhesion molecule 1 (PH-20 hyaluronidase, zona pellucida binding)
hsa-miR-1323	1	0	1	1	1	1	SRI	sorcin
hsa-miR-1323	1	0	1	0	1	1	STC1	stanniocalcin 1
hsa-miR-1323	0	0	1	1	1	1	STIM1	stromal interaction molecule 1
hsa-miR-1323	0	0	1	1	1	1	STRN	striatin, calmodulin binding protein
hsa-miR-1323	1	0	1	0	1	1	TAL1	T-cell acute lymphocytic leukemia 1
hsa-miR-1323	0	0	1	0	1	1	TCF21	transcription factor 21
hsa-miR-1323	1	0	1	1	1	1	TDG	thymine-DNA glycosylase
hsa-miR-1323	0	0	1	0	1	1	TDGF1	teratocarcinoma-derived growth factor 1
hsa-miR-1323	1	0	1	1	1	1	TEC	tec protein tyrosine kinase
hsa-miR-1323	1	0	1	1	1	1	TFAP2B	transcription factor AP-2 beta (activating enhancer binding protein 2 beta)
hsa-miR-1323	1	0	1	1	1	1	TIAM1	T-cell lymphoma invasion and metastasis 1
hsa-miR-1323	1	0	1	0	1	1	SEC62	SEC62 homolog (S. cerevisiae)
hsa-miR-1323	0	0	1	1	1	1	TTK	TTK protein kinase
hsa-miR-1323	1	0	1	1	1	1	UBE2B	ubiquitin-conjugating enzyme E2B
hsa-miR-1323	1	0	1	1	1	1	UBE2D3	ubiquitin-conjugating enzyme E2D 3
hsa-miR-1323	0	0	1	1	0	0	VGF	VGF nerve growth factor inducible
hsa-miR-1323	1	0	1	0	1	1	YWHAB	tyrosine 3-monooxygenase/tryptophan 5-monooxygenase activation protein, beta polypeptide
hsa-miR-1323	1	0	1	1	1	1	YWHAH	tyrosine 3-monooxygenase/tryptophan 5-monooxygenase activation protein, eta polypeptide
hsa-miR-1323	1	0	1	1	1	1	ZNF131	zinc finger protein 131
hsa-miR-1323	1	0	1	1	1	1	CUL5	cullin 5
hsa-miR-1323	1	0	1	1	1	1	NRIP1	nuclear receptor interacting protein 1
hsa-miR-1323	1	0	1	1	1	1	FZD1	frizzled family receptor 1
hsa-miR-1323	0	0	1	1	1	1	PIP5K1B	phosphatidylinositol-4-phosphate 5-kinase, type I, beta
hsa-miR-1323	0	0	1	1	1	1	STX7	syntaxin 7
hsa-miR-1323	1	0	1	1	1	1	DYRK2	dual-specificity tyrosine-(Y)-phosphorylation regulated kinase 2
hsa-miR-1323	1	0	1	1	1	1	SUPT3H	suppressor of Ty 3 homolog (S. cerevisiae)
hsa-miR-1323	1	0	1	1	1	1	CDC14A	CDC14 cell division cycle 14 homolog A (S. cerevisiae)
hsa-miR-1323	0	0	1	1	1	1	KMO	kynurenine 3-monooxygenase (kynurenine 3-hydroxylase)
hsa-miR-1323	1	0	1	1	0	0	KHSRP	KH-type splicing regulatory protein
hsa-miR-1323	1	0	1	0	1	1	PCDHGA12	protocadherin gamma subfamily A, 12
hsa-miR-1323	1	0	1	0	1	1	PCDHGB4	protocadherin gamma subfamily B, 4
hsa-miR-1323	1	0	1	0	1	1	TNKS	tankyrase, TRF1-interacting ankyrin-related ADP-ribose polymerase
hsa-miR-1323	1	0	1	0	1	1	IRS2	insulin receptor substrate 2
hsa-miR-1323	0	0	1	1	1	1	EIF3A	eukaryotic translation initiation factor 3, subunit A
hsa-miR-1323	1	0	1	1	1	1	B3GALT2	UDP-Gal:betaGlcNAc beta 1,3-galactosyltransferase, polypeptide 2
hsa-miR-1323	1	0	1	1	1	1	URI1	URI1, prefoldin-like chaperone
hsa-miR-1323	1	0	1	1	1	1	ADAM9	ADAM metallopeptidase domain 9
hsa-miR-1323	1	0	1	1	1	1	SNAP23	synaptosomal-associated protein, 23kDa
hsa-miR-1323	1	0	1	1	1	1	IQGAP1	IQ motif containing GTPase activating protein 1
hsa-miR-1323	1	0	1	0	1	1	CDK5R1	cyclin-dependent kinase 5, regulatory subunit 1 (p35)
hsa-miR-1323	1	0	1	1	1	1	ALDH1A2	aldehyde dehydrogenase 1 family, member A2
hsa-miR-1323	0	0	1	1	1	1	PRPF4B	PRP4 pre-mRNA processing factor 4 homolog B (yeast)
hsa-miR-1323	0	0	1	1	1	1	TIMELESS	timeless homolog (Drosophila)
hsa-miR-1323	0	0	1	1	1	1	MPZL1	myelin protein zero-like 1
hsa-miR-1323	0	0	1	1	1	1	UBA3	ubiquitin-like modifier activating enzyme 3
hsa-miR-1323	1	0	1	1	1	1	MAP7	microtubule-associated protein 7
hsa-miR-1323	0	0	1	0	1	1	RHOB	ras homolog family member B
hsa-miR-1323	1	0	1	1	1	1	CDH12	cadherin 12, type 2 (N-cadherin 2)
hsa-miR-1323	0	0	1	1	1	1	CDKN1B	cyclin-dependent kinase inhibitor 1B (p27, Kip1)
hsa-miR-1323	0	0	1	1	1	1	CETN1	centrin, EF-hand protein, 1
hsa-miR-1323	0	0	1	1	1	1	CRY1	cryptochrome 1 (photolyase-like)
hsa-miR-1323	1	0	1	1	1	1	EFNB2	ephrin-B2
hsa-miR-1323	0	0	1	0	1	1	EIF4EBP2	eukaryotic translation initiation factor 4E binding protein 2
hsa-miR-1323	1	0	1	1	1	1	GMFB	glia maturation factor, beta
hsa-miR-1323	1	0	1	0	1	1	IREB2	iron-responsive element binding protein 2
hsa-miR-1323	1	0	1	0	1	1	SLC1A2	solute carrier family 1 (glial high affinity glutamate transporter), member 2
hsa-miR-1323	0	0	1	1	0	0	SLC28A2	solute carrier family 28 (sodium-coupled nucleoside transporter), member 2
hsa-miR-1323	1	0	1	0	1	1	CYTH3	cytohesin 3
hsa-miR-1323	1	0	1	1	1	1	MED21	mediator complex subunit 21
hsa-miR-1323	1	0	1	0	1	1	AKAP6	A kinase (PRKA) anchor protein 6
hsa-miR-1323	1	0	1	1	1	1	GDA	guanine deaminase
hsa-miR-1323	0	0	1	1	1	1	ASCL1	achaete-scute complex homolog 1 (Drosophila)
hsa-miR-1323	1	0	1	0	1	1	RUNX1T1	runt-related transcription factor 1; translocated to, 1 (cyclin D-related)
hsa-miR-1323	0	0	1	1	1	1	CDH1	cadherin 1, type 1, E-cadherin (epithelial)
hsa-miR-1323	0	0	1	1	1	1	COL12A1	collagen, type XII, alpha 1
hsa-miR-1323	1	0	1	1	0	0	ERH	enhancer of rudimentary homolog (Drosophila)
hsa-miR-1323	1	0	1	0	1	1	ETV5	ets variant 5
hsa-miR-1323	1	0	1	0	1	1	ACSL4	acyl-CoA synthetase long-chain family member 4
hsa-miR-1323	1	0	1	1	1	1	FGD1	FYVE, RhoGEF and PH domain containing 1
hsa-miR-1323	1	0	1	1	1	1	FUT8	fucosyltransferase 8 (alpha (1,6) fucosyltransferase)
hsa-miR-1323	0	0	1	0	1	1	GALNT3	UDP-N-acetyl-alpha-D-galactosamine:polypeptide N-acetylgalactosaminyltransferase 3 (GalNAc-T3)
hsa-miR-1323	0	0	1	1	1	1	HOXB7	homeobox B7
hsa-miR-1323	1	0	1	0	1	1	PKNOX1	PBX/knotted 1 homeobox 1
hsa-miR-1323	0	0	1	1	1	1	TRAF6	TNF receptor-associated factor 6, E3 ubiquitin protein ligase
hsa-miR-1323	0	0	1	1	1	1	CDK2AP1	cyclin-dependent kinase 2 associated protein 1
hsa-miR-1323	1	0	1	1	1	1	COIL	coilin
hsa-miR-1323	1	0	1	0	1	1	USP9Y	ubiquitin specific peptidase 9, Y-linked
hsa-miR-1323	1	0	1	1	1	1	RAB11A	RAB11A, member RAS oncogene family
hsa-miR-1323	1	0	1	1	1	1	MTMR4	myotubularin related protein 4
hsa-miR-1323	0	0	1	1	0	0	NMI	N-myc (and STAT) interactor
hsa-miR-1323	1	0	1	1	1	1	SCAF11	SR-related CTD-associated factor 11
hsa-miR-1323	0	0	1	1	0	0	ZW10	ZW10, kinetochore associated, homolog (Drosophila)
hsa-miR-1323	0	0	1	1	1	1	BUB3	budding uninhibited by benzimidazoles 3 homolog (yeast)
hsa-miR-1323	0	0	1	1	1	1	MTA2	metastasis associated 1 family, member 2
hsa-miR-1323	1	0	1	1	1	1	MED1	mediator complex subunit 1
hsa-miR-1323	1	0	1	1	1	1	B4GALT6	UDP-Gal:betaGlcNAc beta 1,4- galactosyltransferase, polypeptide 6
hsa-miR-1323	0	0	1	1	1	1	LHX2	LIM homeobox 2
hsa-miR-1323	1	0	1	0	1	1	CDYL	chromodomain protein, Y-like
hsa-miR-1323	0	0	1	1	1	1	EIF2AK3	eukaryotic translation initiation factor 2-alpha kinase 3
hsa-miR-1323	1	0	1	1	1	1	ONECUT2	one cut homeobox 2
hsa-miR-1323	0	0	1	1	1	1	PIGB	phosphatidylinositol glycan anchor biosynthesis, class B
hsa-miR-1323	0	0	1	1	1	1	CDH6	cadherin 6, type 2, K-cadherin (fetal kidney)
hsa-miR-1323	0	0	1	1	1	1	DSC1	desmocollin 1
hsa-miR-1323	0	0	1	0	1	1	DSC2	desmocollin 2
hsa-miR-1323	1	0	1	0	1	1	KRAS	v-Ki-ras2 Kirsten rat sarcoma viral oncogene homolog
hsa-miR-1323	0	0	1	1	0	0	NDUFA9	NADH dehydrogenase (ubiquinone) 1 alpha subcomplex, 9, 39kDa
hsa-miR-1323	0	0	1	1	1	1	NDUFS1	NADH dehydrogenase (ubiquinone) Fe-S protein 1, 75kDa (NADH-coenzyme Q reductase)
hsa-miR-1323	0	0	1	1	1	1	PPID	peptidylprolyl isomerase D
hsa-miR-1323	0	0	1	1	1	1	PRCP	prolylcarboxypeptidase (angiotensinase C)
hsa-miR-1323	1	0	1	0	1	1	SCD	stearoyl-CoA desaturase (delta-9-desaturase)
hsa-miR-1323	1	0	1	0	1	1	SEL1L	sel-1 suppressor of lin-12-like (C. elegans)
hsa-miR-1323	1	0	1	1	1	1	SFPQ	splicing factor proline/glutamine-rich
hsa-miR-1323	1	0	1	1	1	1	SIAH2	siah E3 ubiquitin protein ligase 2
hsa-miR-1323	1	0	1	1	1	1	TLE1	transducin-like enhancer of split 1 (E(sp1) homolog, Drosophila)
hsa-miR-1323	1	0	1	1	1	1	OXSR1	oxidative-stress responsive 1
hsa-miR-1323	1	0	1	1	1	1	MED13	mediator complex subunit 13
hsa-miR-1323	1	0	1	0	1	1	NUP153	nucleoporin 153kDa
hsa-miR-1323	0	0	1	1	1	1	CLEC2B	C-type lectin domain family 2, member B
hsa-miR-1323	0	0	1	1	1	1	FGFBP1	fibroblast growth factor binding protein 1
hsa-miR-1323	0	0	1	1	1	1	ABCD2	ATP-binding cassette, sub-family D (ALD), member 2
hsa-miR-1323	1	0	1	1	1	1	BMI1	BMI1 polycomb ring finger oncogene
hsa-miR-1323	1	0	1	0	1	1	CALM3	calmodulin 3 (phosphorylase kinase, delta)
hsa-miR-1323	1	0	1	1	1	1	FOXN3	forkhead box N3
hsa-miR-1323	1	0	1	1	1	1	CRK	v-crk sarcoma virus CT10 oncogene homolog (avian)
hsa-miR-1323	1	0	1	1	1	1	DLX3	distal-less homeobox 3
hsa-miR-1323	0	0	1	0	1	1	EPHA3	EPH receptor A3
hsa-miR-1323	0	0	1	1	1	1	MSTN	myostatin
hsa-miR-1323	1	0	1	1	1	1	GPM6A	glycoprotein M6A
hsa-miR-1323	0	0	1	1	1	1	GRK5	G protein-coupled receptor kinase 5
hsa-miR-1323	1	0	1	1	1	1	H3F3B	H3 histone, family 3B (H3.3B)
hsa-miR-1323	1	0	1	0	1	1	PRKAB2	protein kinase, AMP-activated, beta 2 non-catalytic subunit
hsa-miR-1323	0	0	1	1	1	1	SLC20A1	solute carrier family 20 (phosphate transporter), member 1
hsa-miR-1323	0	0	1	1	1	1	ST5	suppression of tumorigenicity 5
hsa-miR-1323	1	0	1	0	1	1	CCDC6	coiled-coil domain containing 6
hsa-miR-1323	1	0	1	1	1	1	RND2	Rho family GTPase 2
hsa-miR-1323	1	0	1	1	1	1	MAFB	v-maf musculoaponeurotic fibrosarcoma oncogene homolog B (avian)
hsa-miR-1323	1	0	1	1	1	1	AKT3	v-akt murine thymoma viral oncogene homolog 3 (protein kinase B, gamma)
hsa-miR-1323	1	0	1	1	1	1	PIGK	phosphatidylinositol glycan anchor biosynthesis, class K
hsa-miR-1323	0	0	1	1	1	1	DNAJB6	DnaJ (Hsp40) homolog, subfamily B, member 6
hsa-miR-1323	1	0	1	1	1	1	GTF2E1	general transcription factor IIE, polypeptide 1, alpha 56kDa
hsa-miR-1323	0	0	1	1	1	1	IMPA1	inositol(myo)-1(or 4)-monophosphatase 1
hsa-miR-1323	1	0	1	1	1	1	INSIG1	insulin induced gene 1
hsa-miR-1323	1	0	1	1	1	1	LAMC2	laminin, gamma 2
hsa-miR-1323	0	0	1	1	0	0	LMNB1	lamin B1
hsa-miR-1323	1	0	1	1	1	1	LPP	LIM domain containing preferred translocation partner in lipoma
hsa-miR-1323	0	0	1	0	1	1	POU3F2	POU class 3 homeobox 2
hsa-miR-1323	1	0	1	1	1	1	DLL1	delta-like 1 (Drosophila)
hsa-miR-1323	0	0	1	1	1	1	SOX3	SRY (sex determining region Y)-box 3
hsa-miR-1323	1	0	1	1	1	1	EVI5	ecotropic viral integration site 5
hsa-miR-1323	0	0	1	1	1	1	PDCD7	programmed cell death 7
hsa-miR-1323	1	0	1	1	1	1	UST	uronyl-2-sulfotransferase
hsa-miR-1323	1	0	1	1	1	1	ARPC5	actin related protein 2/3 complex, subunit 5, 16kDa
hsa-miR-1323	1	0	1	1	1	1	EIF1	eukaryotic translation initiation factor 1
hsa-miR-1323	0	0	1	0	1	1	CALCOCO2	calcium binding and coiled-coil domain 2
hsa-miR-1323	1	0	1	1	1	1	PURA	purine-rich element binding protein A
hsa-miR-1323	0	0	1	1	1	1	EIF1B	eukaryotic translation initiation factor 1B
hsa-miR-1323	1	0	1	0	1	1	MAP1B	microtubule-associated protein 1B
hsa-miR-1323	1	0	1	1	1	1	MTF1	metal-regulatory transcription factor 1
hsa-miR-1323	1	0	1	0	1	1	NAB1	NGFI-A binding protein 1 (EGR1 binding protein 1)
hsa-miR-1323	1	0	1	1	1	1	PRCC	papillary renal cell carcinoma (translocation-associated)
hsa-miR-1323	0	0	1	1	1	1	S100A2	S100 calcium binding protein A2
hsa-miR-1323	1	0	1	1	1	1	TSNAX	translin-associated factor X
hsa-miR-1323	0	0	1	1	0	0	UQCRH	ubiquinol-cytochrome c reductase hinge protein
hsa-miR-1323	1	0	1	0	1	1	SCML2	sex comb on midleg-like 2 (Drosophila)
hsa-miR-1323	0	0	1	1	1	1	KRT1	keratin 1
hsa-miR-1323	1	0	1	1	1	1	TMEM50B	transmembrane protein 50B
hsa-miR-1323	1	0	1	1	1	1	DYNC1LI2	dynein, cytoplasmic 1, light intermediate chain 2
hsa-miR-1323	0	0	1	1	1	1	IRF6	interferon regulatory factor 6
hsa-miR-1323	1	0	1	1	1	1	NCK1	NCK adaptor protein 1
hsa-miR-1323	1	0	1	1	1	1	PCBP1	poly(rC) binding protein 1
hsa-miR-1323	1	0	1	1	1	1	PDGFRA	platelet-derived growth factor receptor, alpha polypeptide
hsa-miR-1323	0	0	1	1	0	0	PNOC	prepronociceptin
hsa-miR-1323	0	0	1	1	1	1	PPP2R5A	protein phosphatase 2, regulatory subunit B', alpha
hsa-miR-1323	1	0	1	1	1	1	PPP2R5E	protein phosphatase 2, regulatory subunit B', epsilon isoform
hsa-miR-1323	1	0	1	1	1	1	PKN2	protein kinase N2
hsa-miR-1323	1	0	1	1	1	1	SMC1A	structural maintenance of chromosomes 1A
hsa-miR-1323	1	0	1	1	1	1	TIMM17A	translocase of inner mitochondrial membrane 17 homolog A (yeast)
hsa-miR-1323	1	0	1	1	1	1	ZER1	zer-1 homolog (C. elegans)
hsa-miR-1323	0	0	1	1	1	1	FST	follistatin
hsa-miR-1323	1	0	1	1	1	1	ZNF238	zinc finger protein 238
hsa-miR-1323	0	0	1	1	1	1	SLC25A17	solute carrier family 25 (mitochondrial carrier; peroxisomal membrane protein, 34kDa), member 17
hsa-miR-1323	0	0	1	1	1	1	CAP2	CAP, adenylate cyclase-associated protein, 2 (yeast)
hsa-miR-1323	1	0	1	1	1	1	NEBL	nebulette
hsa-miR-1323	0	0	1	1	1	1	TM9SF1	transmembrane 9 superfamily member 1
hsa-miR-1323	0	0	1	1	1	1	CXCL13	chemokine (C-X-C motif) ligand 13
hsa-miR-1323	1	0	1	0	1	1	GNAI3	guanine nucleotide binding protein (G protein), alpha inhibiting activity polypeptide 3
hsa-miR-1323	1	0	1	1	1	1	SLC2A1	solute carrier family 2 (facilitated glucose transporter), member 1
hsa-miR-1323	0	0	1	0	1	1	SLC16A2	solute carrier family 16, member 2 (thyroid hormone transporter)
hsa-miR-1323	1	0	1	1	1	1	DYNLT3	dynein, light chain, Tctex-type 3
hsa-miR-1323	1	0	1	0	1	1	NCOA2	nuclear receptor coactivator 2
hsa-miR-1323	1	0	1	1	1	1	KHDRBS1	KH domain containing, RNA binding, signal transduction associated 1
hsa-miR-1323	1	0	1	1	1	1	CORIN	corin, serine peptidase
hsa-miR-1323	1	0	1	0	1	1	API5	apoptosis inhibitor 5
hsa-miR-1323	1	0	1	1	1	1	MAP3K2	mitogen-activated protein kinase kinase kinase 2
hsa-miR-1323	1	0	1	1	1	1	PGRMC1	progesterone receptor membrane component 1
hsa-miR-1323	0	0	1	1	1	1	LYVE1	lymphatic vessel endothelial hyaluronan receptor 1
hsa-miR-1323	1	0	1	1	1	1	MAN1A2	mannosidase, alpha, class 1A, member 2
hsa-miR-1323	1	0	1	1	1	1	DIAPH2	diaphanous homolog 2 (Drosophila)
hsa-miR-1323	1	0	1	0	1	1	TCEA1	transcription elongation factor A (SII), 1
hsa-miR-1323	1	0	1	1	1	1	KAT6A	K(lysine) acetyltransferase 6A
hsa-miR-1323	0	0	1	1	0	0	HNRNPA0	heterogeneous nuclear ribonucleoprotein A0
hsa-miR-1323	0	0	1	1	1	1	TMED2	transmembrane emp24 domain trafficking protein 2
hsa-miR-1323	0	0	1	1	1	1	HOXD3	homeobox D3
hsa-miR-1323	1	0	1	1	1	1	PRRX1	paired related homeobox 1
hsa-miR-1323	1	0	1	1	1	1	RAC1	ras-related C3 botulinum toxin substrate 1 (rho family, small GTP binding protein Rac1)
hsa-miR-1323	1	0	1	1	1	1	RP2	retinitis pigmentosa 2 (X-linked recessive)
hsa-miR-1323	1	0	1	1	1	1	SKP1	S-phase kinase-associated protein 1
hsa-miR-1323	1	0	1	0	1	1	SLC5A3	solute carrier family 5 (sodium/myo-inositol cotransporter), member 3
hsa-miR-1323	1	0	1	1	1	1	HSPA13	heat shock protein 70kDa family, member 13
hsa-miR-1323	0	0	1	1	1	1	TAF5	TAF5 RNA polymerase II, TATA box binding protein (TBP)-associated factor, 100kDa
hsa-miR-1323	1	0	1	0	1	1	PAPD7	PAP associated domain containing 7
hsa-miR-1323	1	0	1	1	1	1	DDX52	DEAD (Asp-Glu-Ala-Asp) box polypeptide 52
hsa-miR-1323	1	0	1	1	1	1	WWP1	WW domain containing E3 ubiquitin protein ligase 1
hsa-miR-1323	0	0	1	1	1	1	RER1	RER1 retention in endoplasmic reticulum 1 homolog (S. cerevisiae)
hsa-miR-1323	1	0	1	1	1	1	ADAMTS5	ADAM metallopeptidase with thrombospondin type 1 motif, 5
hsa-miR-1323	0	0	1	1	1	1	RPP14	ribonuclease P/MRP 14kDa subunit
hsa-miR-1323	1	0	1	1	1	1	SOX21	SRY (sex determining region Y)-box 21
hsa-miR-1323	1	0	1	1	1	1	FSTL1	follistatin-like 1
hsa-miR-1323	1	0	1	1	1	1	UTY	ubiquitously transcribed tetratricopeptide repeat gene, Y-linked
hsa-miR-1323	1	0	1	1	1	1	ZNF81	zinc finger protein 81
hsa-miR-1323	0	0	1	0	1	1	ZXDB	zinc finger, X-linked, duplicated B
hsa-miR-1323	0	0	1	1	1	1	WIF1	WNT inhibitory factor 1
hsa-miR-1323	1	0	1	1	1	1	PALM2-AKAP2	PALM2-AKAP2 readthrough
hsa-miR-1323	0	0	1	1	1	1	MRPL3	mitochondrial ribosomal protein L3
hsa-miR-1323	1	0	1	1	1	1	RNF139	ring finger protein 139
hsa-miR-1323	0	0	1	1	1	1	SLC6A14	solute carrier family 6 (amino acid transporter), member 14
hsa-miR-1323	1	0	1	0	1	1	CHP1	calcineurin-like EF hand protein 1
hsa-miR-1323	1	0	1	1	1	1	KLF12	Kruppel-like factor 12
hsa-miR-1323	0	0	1	0	1	1	PNMA2	paraneoplastic Ma antigen 2
hsa-miR-1323	0	0	1	0	0	0	PHB2	prohibitin 2
hsa-miR-1323	0	0	1	0	1	1	AP4E1	adaptor-related protein complex 4, epsilon 1 subunit
hsa-miR-1323	0	0	1	1	1	1	PLA2R1	phospholipase A2 receptor 1, 180kDa
hsa-miR-1323	1	0	1	1	1	1	TARDBP	TAR DNA binding protein
hsa-miR-1323	0	0	1	1	1	1	MIP	major intrinsic protein of lens fiber
hsa-miR-1323	1	0	1	1	1	1	ELL2	elongation factor, RNA polymerase II, 2
hsa-miR-1323	0	0	1	1	0	0	STAP1	signal transducing adaptor family member 1
hsa-miR-1323	1	0	1	0	1	1	CASP8AP2	caspase 8 associated protein 2
hsa-miR-1323	1	0	1	0	1	1	CD2AP	CD2-associated protein
hsa-miR-1323	1	0	1	1	1	1	FBXL2	F-box and leucine-rich repeat protein 2
hsa-miR-1323	1	0	1	1	1	1	FBXL3	F-box and leucine-rich repeat protein 3
hsa-miR-1323	1	0	1	0	1	1	FZD4	frizzled family receptor 4
hsa-miR-1323	1	0	1	1	1	1	MGEA5	meningioma expressed antigen 5 (hyaluronidase)
hsa-miR-1323	1	0	1	1	1	1	RYBP	RING1 and YY1 binding protein
hsa-miR-1323	0	0	1	1	1	1	SEPHS2	selenophosphate synthetase 2
hsa-miR-1323	0	0	1	1	1	1	RRAS2	related RAS viral (r-ras) oncogene homolog 2
hsa-miR-1323	1	0	1	1	1	1	KCNE1L	KCNE1-like
hsa-miR-1323	1	0	1	0	1	1	ACAP2	ArfGAP with coiled-coil, ankyrin repeat and PH domains 2
hsa-miR-1323	1	0	1	0	1	1	RAPGEF5	Rap guanine nucleotide exchange factor (GEF) 5
hsa-miR-1323	1	0	1	0	1	1	G3BP2	GTPase activating protein (SH3 domain) binding protein 2
hsa-miR-1323	1	0	1	1	1	1	MAPRE1	microtubule-associated protein, RP/EB family, member 1
hsa-miR-1323	1	0	1	0	1	1	BLOC1S6	biogenesis of lysosomal organelles complex-1, subunit 6, pallidin
hsa-miR-1323	1	0	1	1	1	1	RANBP6	RAN binding protein 6
hsa-miR-1323	0	0	1	1	1	1	IFIT5	interferon-induced protein with tetratricopeptide repeats 5
hsa-miR-1323	1	0	1	1	1	1	SF3B3	splicing factor 3b, subunit 3, 130kDa
hsa-miR-1323	1	0	1	1	1	1	TLL2	tolloid-like 2
hsa-miR-1323	0	0	1	1	0	0	LRRC6	leucine rich repeat containing 6
hsa-miR-1323	1	0	1	0	1	1	FLRT2	fibronectin leucine rich transmembrane protein 2
hsa-miR-1323	1	0	1	1	1	1	STK39	serine threonine kinase 39
hsa-miR-1323	0	0	1	1	1	1	N6AMT1	N-6 adenine-specific DNA methyltransferase 1 (putative)
hsa-miR-1323	1	0	1	1	1	1	PPARGC1A	peroxisome proliferator-activated receptor gamma, coactivator 1 alpha
hsa-miR-1323	0	0	1	1	1	1	CTNNA3	catenin (cadherin-associated protein), alpha 3
hsa-miR-1323	1	0	1	1	1	1	FLRT3	fibronectin leucine rich transmembrane protein 3
hsa-miR-1323	1	0	1	1	1	1	SLC30A4	solute carrier family 30 (zinc transporter), member 4
hsa-miR-1323	1	0	1	1	1	1	SLC25A24	solute carrier family 25 (mitochondrial carrier; phosphate carrier), member 24
hsa-miR-1323	1	0	1	1	1	1	NCKAP1	NCK-associated protein 1
hsa-miR-1323	0	0	1	1	1	1	UBQLN1	ubiquilin 1
hsa-miR-1323	0	0	1	1	1	1	UBQLN2	ubiquilin 2
hsa-miR-1323	1	0	1	1	1	1	BAZ1A	bromodomain adjacent to zinc finger domain, 1A
hsa-miR-1323	0	0	1	1	0	0	REM1	RAS (RAD and GEM)-like GTP-binding 1
hsa-miR-1323	1	0	1	1	1	1	ASF1A	ASF1 anti-silencing function 1 homolog A (S. cerevisiae)
hsa-miR-1323	1	0	1	1	1	1	KLF15	Kruppel-like factor 15
hsa-miR-1323	1	0	1	1	1	1	ZBTB44	zinc finger and BTB domain containing 44
hsa-miR-1323	1	0	1	1	1	1	CRIPT	cysteine-rich PDZ-binding protein
hsa-miR-1323	0	0	1	0	1	1	AP2A1	adaptor-related protein complex 2, alpha 1 subunit
hsa-miR-1323	1	0	1	0	1	1	VAMP2	vesicle-associated membrane protein 2 (synaptobrevin 2)
hsa-miR-1323	1	0	1	1	1	1	MAPRE2	microtubule-associated protein, RP/EB family, member 2
hsa-miR-1323	0	0	1	1	1	1	HSPA4L	heat shock 70kDa protein 4-like
hsa-miR-1323	1	0	1	1	1	1	TDRD7	tudor domain containing 7
hsa-miR-1323	1	0	1	1	1	1	CBX6	chromobox homolog 6
hsa-miR-1323	1	0	1	1	1	1	LEMD3	LEM domain containing 3
hsa-miR-1323	1	0	1	1	1	1	SLC7A11	solute carrier family 7 (anionic amino acid transporter light chain, xc- system), member 11
hsa-miR-1323	0	0	1	0	1	1	EID1	EP300 interacting inhibitor of differentiation 1
hsa-miR-1323	1	0	1	1	1	1	MTCH2	mitochondrial carrier 2
hsa-miR-1323	1	0	1	0	1	1	DIEXF	digestive organ expansion factor homolog (zebrafish)
hsa-miR-1323	0	0	1	1	1	1	TSPAN13	tetraspanin 13
hsa-miR-1323	1	0	1	1	1	1	AFF4	AF4/FMR2 family, member 4
hsa-miR-1323	1	0	1	1	1	1	SERP1	stress-associated endoplasmic reticulum protein 1
hsa-miR-1323	0	0	1	1	0	0	SIT1	signaling threshold regulating transmembrane adaptor 1
hsa-miR-1323	1	0	1	1	1	1	PDCD4	programmed cell death 4 (neoplastic transformation inhibitor)
hsa-miR-1323	1	0	1	1	0	0	RBMXL2	RNA binding motif protein, X-linked-like 2
hsa-miR-1323	0	0	1	1	1	1	ARFGAP3	ADP-ribosylation factor GTPase activating protein 3
hsa-miR-1323	0	0	1	1	0	0	LMCD1	LIM and cysteine-rich domains 1
hsa-miR-1323	1	0	1	1	1	1	ERO1L	ERO1-like (S. cerevisiae)
hsa-miR-1323	1	0	1	1	1	1	FAF2	Fas associated factor family member 2
hsa-miR-1323	1	0	1	0	1	1	SH3PXD2A	SH3 and PX domains 2A
hsa-miR-1323	0	0	1	0	1	1	LPIN2	lipin 2
hsa-miR-1323	0	0	1	1	1	1	FAM53B	family with sequence similarity 53, member B
hsa-miR-1323	1	0	1	0	1	1	EDEM1	ER degradation enhancer, mannosidase alpha-like 1
hsa-miR-1323	0	0	1	1	1	1	SART3	squamous cell carcinoma antigen recognized by T cells 3
hsa-miR-1323	1	0	1	0	1	1	MLEC	malectin
hsa-miR-1323	1	0	1	1	1	1	RASSF2	Ras association (RalGDS/AF-6) domain family member 2
hsa-miR-1323	1	0	1	0	1	1	KIAA0232	KIAA0232
hsa-miR-1323	1	0	1	1	1	1	SPCS2	signal peptidase complex subunit 2 homolog (S. cerevisiae)
hsa-miR-1323	1	0	1	0	1	1	SERTAD2	SERTA domain containing 2
hsa-miR-1323	0	0	1	0	1	1	EPM2AIP1	EPM2A (laforin) interacting protein 1
hsa-miR-1323	1	0	1	1	1	1	ZBTB39	zinc finger and BTB domain containing 39
hsa-miR-1323	1	0	1	1	1	1	TBC1D4	TBC1 domain family, member 4
hsa-miR-1323	1	0	1	1	1	1	NUAK1	NUAK family, SNF1-like kinase, 1
hsa-miR-1323	0	0	1	1	1	1	KIAA0196	KIAA0196
hsa-miR-1323	1	0	1	1	1	1	SV2A	synaptic vesicle glycoprotein 2A
hsa-miR-1323	1	0	1	1	1	1	SPAST	spastin
hsa-miR-1323	1	0	1	1	1	1	SPEN	spen homolog, transcriptional regulator (Drosophila)
hsa-miR-1323	1	0	1	1	1	1	USP33	ubiquitin specific peptidase 33
hsa-miR-1323	1	0	1	1	1	1	PHLPP2	PH domain and leucine rich repeat protein phosphatase 2
hsa-miR-1323	1	0	1	0	1	1	PDS5B	PDS5, regulator of cohesion maintenance, homolog B (S. cerevisiae)
hsa-miR-1323	1	0	1	1	1	1	PIKFYVE	phosphoinositide kinase, FYVE finger containing
hsa-miR-1323	1	0	1	1	1	1	ERP44	endoplasmic reticulum protein 44
hsa-miR-1323	0	0	1	1	1	1	KDM4C	lysine (K)-specific demethylase 4C
hsa-miR-1323	1	0	1	0	1	1	PEG10	paternally expressed 10
hsa-miR-1323	1	0	1	1	1	1	SIPA1L3	signal-induced proliferation-associated 1 like 3
hsa-miR-1323	1	0	1	0	1	1	SNX13	sorting nexin 13
hsa-miR-1323	1	0	1	1	1	1	RTF1	Rtf1, Paf1/RNA polymerase II complex component, homolog (S. cerevisiae)
hsa-miR-1323	1	0	1	1	1	1	GPD1L	glycerol-3-phosphate dehydrogenase 1-like
hsa-miR-1323	1	0	1	1	1	1	ZCCHC14	zinc finger, CCHC domain containing 14
hsa-miR-1323	0	0	1	1	1	1	ARL6IP1	ADP-ribosylation factor-like 6 interacting protein 1
hsa-miR-1323	0	0	1	1	1	1	FBXO28	F-box protein 28
hsa-miR-1323	1	0	1	1	1	1	SIK2	salt-inducible kinase 2
hsa-miR-1323	1	0	1	1	1	1	PLCB1	phospholipase C, beta 1 (phosphoinositide-specific)
hsa-miR-1323	1	0	1	1	1	1	PDS5A	PDS5, regulator of cohesion maintenance, homolog A (S. cerevisiae)
hsa-miR-1323	1	0	1	0	1	1	KIAA1024	KIAA1024
hsa-miR-1323	1	0	1	1	1	1	NUP160	nucleoporin 160kDa
hsa-miR-1323	1	0	1	1	1	1	CSTF2T	cleavage stimulation factor, 3' pre-RNA, subunit 2, 64kDa, tau variant
hsa-miR-1323	1	0	1	1	1	1	AHCYL2	adenosylhomocysteinase-like 2
hsa-miR-1323	0	0	1	0	1	1	ZDHHC17	zinc finger, DHHC-type containing 17
hsa-miR-1323	0	0	1	1	1	1	NUP188	nucleoporin 188kDa
hsa-miR-1323	1	0	1	1	1	1	MORC3	MORC family CW-type zinc finger 3
hsa-miR-1323	1	0	1	1	1	1	MOB4	MOB family member 4, phocein
hsa-miR-1323	1	0	1	1	1	1	PARM1	prostate androgen-regulated mucin-like protein 1
hsa-miR-1323	1	0	1	1	1	1	RNF19A	ring finger protein 19A, E3 ubiquitin protein ligase
hsa-miR-1323	1	0	1	0	1	1	OSBPL3	oxysterol binding protein-like 3
hsa-miR-1323	1	0	1	1	1	1	LTN1	listerin E3 ubiquitin protein ligase 1
hsa-miR-1323	1	0	1	0	1	1	ERC2	ELKS/RAB6-interacting/CAST family member 2
hsa-miR-1323	0	0	1	1	1	1	HERC4	HECT and RLD domain containing E3 ubiquitin protein ligase 4
hsa-miR-1323	0	0	1	1	1	1	BRPF3	bromodomain and PHD finger containing, 3
hsa-miR-1323	0	0	1	1	1	1	KRT76	keratin 76
hsa-miR-1323	1	0	1	1	1	1	AZIN1	antizyme inhibitor 1
hsa-miR-1323	1	0	1	0	1	1	TRIM33	tripartite motif containing 33
hsa-miR-1323	0	0	1	0	0	0	RPS27L	ribosomal protein S27-like
hsa-miR-1323	0	0	1	1	1	1	PELO	pelota homolog (Drosophila)
hsa-miR-1323	1	0	1	1	1	1	MEMO1	mediator of cell motility 1
hsa-miR-1323	1	0	1	1	1	1	TAF9B	TAF9B RNA polymerase II, TATA box binding protein (TBP)-associated factor, 31kDa
hsa-miR-1323	0	0	1	0	1	1	OTUD6B	OTU domain containing 6B
hsa-miR-1323	1	0	1	1	1	1	SLMO2	slowmo homolog 2 (Drosophila)
hsa-miR-1323	0	0	1	1	1	1	HDGFRP3	hepatoma-derived growth factor, related protein 3
hsa-miR-1323	0	0	1	1	1	1	RAB10	RAB10, member RAS oncogene family
hsa-miR-1323	0	0	1	1	1	1	DYNC1LI1	dynein, cytoplasmic 1, light intermediate chain 1
hsa-miR-1323	1	0	1	1	1	1	VGLL3	vestigial like 3 (Drosophila)
hsa-miR-1323	0	0	1	1	1	1	TRIP4	thyroid hormone receptor interactor 4
hsa-miR-1323	1	0	1	1	1	1	AKAP11	A kinase (PRKA) anchor protein 11
hsa-miR-1323	0	0	1	1	1	1	KLF2	Kruppel-like factor 2 (lung)
hsa-miR-1323	1	0	1	1	1	1	RNF138	ring finger protein 138, E3 ubiquitin protein ligase
hsa-miR-1323	1	0	1	1	1	1	CMPK1	cytidine monophosphate (UMP-CMP) kinase 1, cytosolic
hsa-miR-1323	0	0	1	1	1	1	CENPF	centromere protein F, 350/400kDa (mitosin)
hsa-miR-1323	1	0	1	0	1	1	RNF141	ring finger protein 141
hsa-miR-1323	1	0	1	1	1	1	PHF20	PHD finger protein 20
hsa-miR-1323	1	0	1	1	1	1	VTA1	Vps20-associated 1 homolog (S. cerevisiae)
hsa-miR-1323	0	0	1	0	1	1	GPR83	G protein-coupled receptor 83
hsa-miR-1323	1	0	1	1	1	1	DNAJC27	DnaJ (Hsp40) homolog, subfamily C, member 27
hsa-miR-1323	1	0	1	1	1	1	IER5	immediate early response 5
hsa-miR-1323	0	0	1	1	1	1	SDF4	stromal cell derived factor 4
hsa-miR-1323	1	0	1	1	1	1	RAB6B	RAB6B, member RAS oncogene family
hsa-miR-1323	1	0	1	1	1	1	UFM1	ubiquitin-fold modifier 1
hsa-miR-1323	1	0	1	1	1	1	ZNF644	zinc finger protein 644
hsa-miR-1323	1	0	1	1	1	1	MEX3C	mex-3 homolog C (C. elegans)
hsa-miR-1323	1	0	1	1	1	1	WAC	WW domain containing adaptor with coiled-coil
hsa-miR-1323	1	0	1	1	1	1	SIX4	SIX homeobox 4
hsa-miR-1323	1	0	1	0	1	1	CYTH1	cytohesin 1
hsa-miR-1323	1	0	1	1	0	0	C17orf59	chromosome 17 open reading frame 59
hsa-miR-1323	1	0	1	1	1	1	ZNF280C	zinc finger protein 280C
hsa-miR-1323	0	0	1	1	1	1	ERCC6L	excision repair cross-complementing rodent repair deficiency, complementation group 6-like
hsa-miR-1323	0	0	1	1	0	0	NUP62CL	nucleoporin 62kDa C-terminal like
hsa-miR-1323	1	0	1	0	1	1	FAM46C	family with sequence similarity 46, member C
hsa-miR-1323	1	0	1	0	1	1	DCAF16	DDB1 and CUL4 associated factor 16
hsa-miR-1323	1	0	1	1	1	1	TBC1D8B	TBC1 domain family, member 8B (with GRAM domain)
hsa-miR-1323	1	0	1	1	1	1	LPPR1	lipid phosphate phosphatase-related protein type 1
hsa-miR-1323	1	0	1	1	1	1	YTHDF1	YTH domain family, member 1
hsa-miR-1323	1	0	1	1	1	1	IMPAD1	inositol monophosphatase domain containing 1
hsa-miR-1323	1	0	1	0	1	1	MARCH5	membrane-associated ring finger (C3HC4) 5
hsa-miR-1323	0	0	1	1	1	1	SOHLH2	spermatogenesis and oogenesis specific basic helix-loop-helix 2
hsa-miR-1323	0	0	1	1	1	1	C2orf42	chromosome 2 open reading frame 42
hsa-miR-1323	1	0	1	1	1	1	GID8	GID complex subunit 8 homolog (S. cerevisiae)
hsa-miR-1323	1	0	1	1	1	1	C9orf40	chromosome 9 open reading frame 40
hsa-miR-1323	1	0	1	1	1	1	ARGLU1	arginine and glutamate rich 1
hsa-miR-1323	1	0	1	1	1	1	AGGF1	angiogenic factor with G patch and FHA domains 1
hsa-miR-1323	1	0	1	1	1	1	FIGN	fidgetin
hsa-miR-1323	1	0	1	1	1	1	TMEM33	transmembrane protein 33
hsa-miR-1323	1	0	1	0	1	1	MSL2	male-specific lethal 2 homolog (Drosophila)
hsa-miR-1323	0	0	1	1	1	1	MRPS10	mitochondrial ribosomal protein S10
hsa-miR-1323	0	0	1	0	1	1	GOLPH3L	golgi phosphoprotein 3-like
hsa-miR-1323	1	0	1	0	1	1	ARL8B	ADP-ribosylation factor-like 8B
hsa-miR-1323	1	0	1	1	1	1	TBC1D13	TBC1 domain family, member 13
hsa-miR-1323	0	0	1	0	1	1	TMEM57	transmembrane protein 57
hsa-miR-1323	1	0	1	1	1	1	LRRC1	leucine rich repeat containing 1
hsa-miR-1323	1	0	1	1	1	1	UBA6	ubiquitin-like modifier activating enzyme 6
hsa-miR-1323	1	0	1	0	1	1	SEPT11	septin 11
hsa-miR-1323	1	0	1	1	1	1	KIAA1598	KIAA1598
hsa-miR-1323	0	0	1	0	1	1	TXLNG	taxilin gamma
hsa-miR-1323	1	0	1	0	1	1	LIN7C	lin-7 homolog C (C. elegans)
hsa-miR-1323	1	0	1	1	1	1	RSBN1	round spermatid basic protein 1
hsa-miR-1323	1	0	1	1	1	1	SLC39A9	solute carrier family 39 (zinc transporter), member 9
hsa-miR-1323	1	0	1	0	1	1	FOXJ2	forkhead box J2
hsa-miR-1323	1	0	1	1	1	1	RRN3	RRN3 RNA polymerase I transcription factor homolog (S. cerevisiae)
hsa-miR-1323	1	0	1	1	1	1	PAG1	phosphoprotein associated with glycosphingolipid microdomains 1
hsa-miR-1323	0	0	1	0	0	0	FAM45B	family with sequence similarity 45, member A pseudogene
hsa-miR-1323	1	0	1	1	1	1	NRP2	neuropilin 2
hsa-miR-1323	1	0	1	0	1	1	LRP1B	low density lipoprotein receptor-related protein 1B
hsa-miR-1323	1	0	1	1	1	1	CAMK2N1	calcium/calmodulin-dependent protein kinase II inhibitor 1
hsa-miR-1323	1	0	1	1	1	1	ETNK1	ethanolamine kinase 1
hsa-miR-1323	1	0	1	0	1	1	SMPD3	sphingomyelin phosphodiesterase 3, neutral membrane (neutral sphingomyelinase II)
hsa-miR-1323	0	0	1	1	1	1	ELAC1	elaC homolog 1 (E. coli)
hsa-miR-1323	1	0	1	1	1	1	CTTNBP2NL	CTTNBP2 N-terminal like
hsa-miR-1323	1	0	1	0	1	1	TMEM55A	transmembrane protein 55A
hsa-miR-1323	1	0	1	0	1	1	PCDHAC1	protocadherin alpha subfamily C, 1
hsa-miR-1323	1	0	1	0	1	1	PCDHAC2	protocadherin alpha subfamily C, 2
hsa-miR-1323	1	0	1	1	1	1	PCDHA1	protocadherin alpha 1
hsa-miR-1323	1	0	1	0	1	1	PCDHA10	protocadherin alpha 10
hsa-miR-1323	1	0	1	0	1	1	PCDHA11	protocadherin alpha 11
hsa-miR-1323	1	0	1	0	1	1	PCDHA12	protocadherin alpha 12
hsa-miR-1323	1	0	1	1	1	1	PCDHA2	protocadherin alpha 2
hsa-miR-1323	1	0	1	1	1	1	PCDHA3	protocadherin alpha 3
hsa-miR-1323	1	0	1	1	1	1	PCDHA6	protocadherin alpha 6
hsa-miR-1323	1	0	1	0	1	1	PCDHA7	protocadherin alpha 7
hsa-miR-1323	1	0	1	1	1	1	PCDHA8	protocadherin alpha 8
hsa-miR-1323	1	0	1	1	1	1	PCDHGA1	protocadherin gamma subfamily A, 1
hsa-miR-1323	1	0	1	0	1	1	PCDHGA10	protocadherin gamma subfamily A, 10
hsa-miR-1323	1	0	1	0	1	1	PCDHGA11	protocadherin gamma subfamily A, 11
hsa-miR-1323	1	0	1	1	1	1	PCDHGA2	protocadherin gamma subfamily A, 2
hsa-miR-1323	1	0	1	0	1	1	PCDHGA3	protocadherin gamma subfamily A, 3
hsa-miR-1323	1	0	1	0	1	1	PCDHGA4	protocadherin gamma subfamily A, 4
hsa-miR-1323	1	0	1	0	1	1	PCDHGA5	protocadherin gamma subfamily A, 5
hsa-miR-1323	1	0	1	0	1	1	PCDHGA6	protocadherin gamma subfamily A, 6
hsa-miR-1323	1	0	1	0	1	1	PCDHGA7	protocadherin gamma subfamily A, 7
hsa-miR-1323	1	0	1	0	1	1	PCDHGA9	protocadherin gamma subfamily A, 9
hsa-miR-1323	1	0	1	0	1	1	PCDHGB1	protocadherin gamma subfamily B, 1
hsa-miR-1323	1	0	1	0	1	1	PCDHGB2	protocadherin gamma subfamily B, 2
hsa-miR-1323	1	0	1	0	1	1	PCDHGB3	protocadherin gamma subfamily B, 3
hsa-miR-1323	1	0	1	0	1	1	PCDHGB5	protocadherin gamma subfamily B, 5
hsa-miR-1323	1	0	1	0	1	1	PCDHGB6	protocadherin gamma subfamily B, 6
hsa-miR-1323	1	0	1	0	1	1	PCDHGB7	protocadherin gamma subfamily B, 7
hsa-miR-1323	1	0	1	0	1	1	PCDHGC4	protocadherin gamma subfamily C, 4
hsa-miR-1323	1	0	1	0	1	1	PCDHGC5	protocadherin gamma subfamily C, 5
hsa-miR-1323	1	0	1	1	1	1	HOXA10	homeobox A10
hsa-miR-1323	1	0	1	1	0	0	GPR173	G protein-coupled receptor 173
hsa-miR-1323	0	0	1	1	1	1	TERF2IP	telomeric repeat binding factor 2, interacting protein
hsa-miR-1323	1	0	1	0	1	1	FAM190B	family with sequence similarity 190, member B
hsa-miR-1323	0	0	1	1	1	1	GNL3L	guanine nucleotide binding protein-like 3 (nucleolar)-like
hsa-miR-1323	1	0	1	1	1	1	NDFIP2	Nedd4 family interacting protein 2
hsa-miR-1323	1	0	1	1	1	1	PLEKHA3	pleckstrin homology domain containing, family A (phosphoinositide binding specific) member 3
hsa-miR-1323	0	0	1	1	1	1	RNF20	ring finger protein 20, E3 ubiquitin protein ligase
hsa-miR-1323	1	0	1	1	1	1	SERTAD4	SERTA domain containing 4
hsa-miR-1323	1	0	1	1	1	1	WDR45L	WDR45-like
hsa-miR-1323	0	0	1	1	1	1	RPRM	reprimo, TP53 dependent G2 arrest mediator candidate
hsa-miR-1323	1	0	1	1	1	1	POLE4	polymerase (DNA-directed), epsilon 4, accessory subunit
hsa-miR-1323	1	0	1	0	1	1	TM9SF3	transmembrane 9 superfamily member 3
hsa-miR-1323	1	0	1	1	1	1	WRNIP1	Werner helicase interacting protein 1
hsa-miR-1323	0	0	1	1	1	1	TMEM167B	transmembrane protein 167B
hsa-miR-1323	1	0	1	0	1	1	PAPOLB	poly(A) polymerase beta (testis specific)
hsa-miR-1323	1	0	1	1	1	1	CNNM4	cyclin M4
hsa-miR-1323	0	0	1	1	1	1	ACN9	ACN9 homolog (S. cerevisiae)
hsa-miR-1323	1	0	1	0	1	1	OTUD7B	OTU domain containing 7B
hsa-miR-1323	1	0	1	1	1	1	PRDM8	PR domain containing 8
hsa-miR-1323	0	0	1	1	1	1	CXCR7	chemokine (C-X-C motif) receptor 7
hsa-miR-1323	1	0	1	1	1	1	PAK7	p21 protein (Cdc42/Rac)-activated kinase 7
hsa-miR-1323	0	0	1	1	1	1	PDSS2	prenyl (decaprenyl) diphosphate synthase, subunit 2
hsa-miR-1323	1	0	1	0	1	1	EIF5A2	eukaryotic translation initiation factor 5A2
hsa-miR-1323	0	0	1	1	0	0	XAGE1D	X antigen family, member 1D
hsa-miR-1323	1	0	1	1	1	1	ATP8B2	ATPase, aminophospholipid transporter, class I, type 8B, member 2
hsa-miR-1323	1	0	1	1	1	1	OSM	oncostatin M
hsa-miR-1323	1	0	1	0	1	1	ADCY2	adenylate cyclase 2 (brain)
hsa-miR-1323	1	0	1	1	1	1	JPH1	junctophilin 1
hsa-miR-1323	0	0	1	0	1	1	TWSG1	twisted gastrulation homolog 1 (Drosophila)
hsa-miR-1323	1	0	1	1	1	1	CBX8	chromobox homolog 8
hsa-miR-1323	1	0	1	1	1	1	RAB22A	RAB22A, member RAS oncogene family
hsa-miR-1323	0	0	1	0	1	1	ZNF490	zinc finger protein 490
hsa-miR-1323	1	0	1	1	1	1	USP31	ubiquitin specific peptidase 31
hsa-miR-1323	1	0	1	0	1	1	NUFIP2	nuclear fragile X mental retardation protein interacting protein 2
hsa-miR-1323	1	0	1	0	1	1	ALPK3	alpha-kinase 3
hsa-miR-1323	1	0	1	0	1	1	KLHDC5	kelch domain containing 5
hsa-miR-1323	1	0	1	0	1	1	SYT4	synaptotagmin IV
hsa-miR-1323	1	0	1	1	1	1	SEMA6A	sema domain, transmembrane domain (TM), and cytoplasmic domain, (semaphorin) 6A
hsa-miR-1323	0	0	1	0	1	1	TRMT5	tRNA methyltransferase 5 homolog (S. cerevisiae)
hsa-miR-1323	1	0	1	1	1	1	ARHGAP21	Rho GTPase activating protein 21
hsa-miR-1323	1	0	1	1	1	1	TSHZ3	teashirt zinc finger homeobox 3
hsa-miR-1323	1	0	1	0	1	1	RNF213	ring finger protein 213
hsa-miR-1323	1	0	1	0	1	1	GPAM	glycerol-3-phosphate acyltransferase, mitochondrial
hsa-miR-1323	0	0	1	1	1	1	PRX	periaxin
hsa-miR-1323	0	0	1	1	1	1	B3GALT1	UDP-Gal:betaGlcNAc beta 1,3-galactosyltransferase, polypeptide 1
hsa-miR-1323	0	0	1	1	1	1	TLX3	T-cell leukemia homeobox 3
hsa-miR-1323	1	0	1	0	1	1	RAP2A	RAP2A, member of RAS oncogene family
hsa-miR-1323	1	0	1	0	1	1	NMT1	N-myristoyltransferase 1
hsa-miR-1323	0	0	1	1	1	1	RNASEL	ribonuclease L (2',5'-oligoisoadenylate synthetase-dependent)
hsa-miR-1323	1	0	1	1	1	1	RTN1	reticulon 1
hsa-miR-1323	0	0	1	1	0	0	HMHB1	histocompatibility (minor) HB-1
hsa-miR-1323	1	0	1	1	1	1	C6orf47	chromosome 6 open reading frame 47
hsa-miR-1323	0	0	1	0	1	1	MS4A7	membrane-spanning 4-domains, subfamily A, member 7
hsa-miR-1323	1	0	1	1	1	1	FAM60A	family with sequence similarity 60, member A
hsa-miR-1323	1	0	1	1	1	1	PELI2	pellino E3 ubiquitin protein ligase family member 2
hsa-miR-1323	0	0	1	1	1	1	PRDM13	PR domain containing 13
hsa-miR-1323	0	0	1	1	1	1	ADAM30	ADAM metallopeptidase domain 30
hsa-miR-1323	0	0	1	0	1	1	CFL2	cofilin 2 (muscle)
hsa-miR-1323	1	0	1	0	1	1	ZNF70	zinc finger protein 70
hsa-miR-1323	0	0	1	1	0	0	C12orf44	chromosome 12 open reading frame 44
hsa-miR-1323	1	0	1	1	1	1	FOXM1	forkhead box M1
hsa-miR-1323	0	0	1	1	1	1	PGM5	phosphoglucomutase 5
hsa-miR-1323	1	0	1	1	1	1	SEC24A	SEC24 family, member A (S. cerevisiae)
hsa-miR-1323	1	0	1	0	1	1	CSNK1G1	casein kinase 1, gamma 1
hsa-miR-1323	0	0	1	1	1	1	HEATR6	HEAT repeat containing 6
hsa-miR-1323	1	0	1	1	1	1	GOLPH3	golgi phosphoprotein 3 (coat-protein)
hsa-miR-1323	0	0	1	1	0	0	MCCC2	methylcrotonoyl-CoA carboxylase 2 (beta)
hsa-miR-1323	1	0	1	1	1	1	SNX16	sorting nexin 16
hsa-miR-1323	1	0	1	1	1	1	XPO4	exportin 4
hsa-miR-1323	0	0	1	1	1	1	IKZF5	IKAROS family zinc finger 5 (Pegasus)
hsa-miR-1323	1	0	1	0	1	1	GREM2	gremlin 2
hsa-miR-1323	0	0	1	1	1	1	HHIP	hedgehog interacting protein
hsa-miR-1323	1	0	1	1	1	1	MESDC1	mesoderm development candidate 1
hsa-miR-1323	0	0	1	1	1	1	CLEC7A	C-type lectin domain family 7, member A
hsa-miR-1323	1	0	1	0	1	1	HOXC8	homeobox C8
hsa-miR-1323	1	0	1	1	1	1	S100PBP	S100P binding protein
hsa-miR-1323	0	0	1	1	1	1	SFXN1	sideroflexin 1
hsa-miR-1323	1	0	1	1	1	1	C6orf106	chromosome 6 open reading frame 106
hsa-miR-1323	1	0	1	1	1	1	YTHDC2	YTH domain containing 2
hsa-miR-1323	1	0	1	0	1	1	USP46	ubiquitin specific peptidase 46
hsa-miR-1323	1	0	1	1	1	1	SOWAHC	sosondowah ankyrin repeat domain family member C
hsa-miR-1323	0	0	1	0	1	1	ANKRA2	ankyrin repeat, family A (RFXANK-like), 2
hsa-miR-1323	1	0	1	1	1	1	GID4	GID complex subunit 4, VID24 homolog (S. cerevisiae)
hsa-miR-1323	1	0	1	0	1	1	NOTCH2	notch 2
hsa-miR-1323	1	0	1	1	1	1	PSTPIP2	proline-serine-threonine phosphatase interacting protein 2
hsa-miR-1323	1	0	1	1	1	1	HOXD1	homeobox D1
hsa-miR-1323	0	0	1	1	0	0	ZBED2	zinc finger, BED-type containing 2
hsa-miR-1323	1	0	1	1	1	1	C10orf76	chromosome 10 open reading frame 76
hsa-miR-1323	0	0	1	1	1	1	RNF219	ring finger protein 219
hsa-miR-1323	1	0	1	0	1	1	PLEKHF2	pleckstrin homology domain containing, family F (with FYVE domain) member 2
hsa-miR-1323	1	0	1	1	1	1	C3orf52	chromosome 3 open reading frame 52
hsa-miR-1323	0	0	1	1	1	1	SNIP1	Smad nuclear interacting protein 1
hsa-miR-1323	1	0	1	0	1	1	ZFHX4	zinc finger homeobox 4
hsa-miR-1323	1	0	1	1	1	1	TMC7	transmembrane channel-like 7
hsa-miR-1323	1	0	1	1	1	1	CEP76	centrosomal protein 76kDa
hsa-miR-1323	1	0	1	0	1	1	NAA25	N(alpha)-acetyltransferase 25, NatB auxiliary subunit
hsa-miR-1323	1	0	1	0	1	1	VCPIP1	valosin containing protein (p97)/p47 complex interacting protein 1
hsa-miR-1323	1	0	1	1	1	1	FBXO11	F-box protein 11
hsa-miR-1323	1	0	1	1	1	1	NAA50	N(alpha)-acetyltransferase 50, NatE catalytic subunit
hsa-miR-1323	1	0	1	1	1	1	EFHC2	EF-hand domain (C-terminal) containing 2
hsa-miR-1323	1	0	1	0	1	1	EDEM3	ER degradation enhancer, mannosidase alpha-like 3
hsa-miR-1323	1	0	1	1	1	1	ZBTB46	zinc finger and BTB domain containing 46
hsa-miR-1323	0	0	1	1	1	1	SLC19A3	solute carrier family 19, member 3
hsa-miR-1323	1	0	1	0	1	1	SRCIN1	SRC kinase signaling inhibitor 1
hsa-miR-1323	1	0	1	1	1	1	JHDM1D	jumonji C domain containing histone demethylase 1 homolog D (S. cerevisiae)
hsa-miR-1323	1	0	1	0	1	1	SETD7	SET domain containing (lysine methyltransferase) 7
hsa-miR-1323	1	0	1	1	1	1	TMX1	thioredoxin-related transmembrane protein 1
hsa-miR-1323	0	0	1	1	1	1	HMGN5	high mobility group nucleosome binding domain 5
hsa-miR-1323	1	0	1	1	1	1	SGPP1	sphingosine-1-phosphate phosphatase 1
hsa-miR-1323	1	0	1	0	1	1	C1orf21	chromosome 1 open reading frame 21
hsa-miR-1323	1	0	1	1	1	1	SNX27	sorting nexin family member 27
hsa-miR-1323	1	0	1	1	1	1	C6orf62	chromosome 6 open reading frame 62
hsa-miR-1323	1	0	1	1	1	1	TIGD6	tigger transposable element derived 6
hsa-miR-1323	0	0	1	1	1	1	SEH1L	SEH1-like (S. cerevisiae)
hsa-miR-1323	1	0	1	1	1	1	TEX14	testis expressed 14
hsa-miR-1323	1	0	1	1	1	1	ANO3	anoctamin 3
hsa-miR-1323	0	0	1	1	1	1	COG3	component of oligomeric golgi complex 3
hsa-miR-1323	1	0	1	0	1	1	THAP2	THAP domain containing, apoptosis associated protein 2
hsa-miR-1323	1	0	1	1	1	1	CRISPLD1	cysteine-rich secretory protein LCCL domain containing 1
hsa-miR-1323	1	0	1	1	1	1	HSDL1	hydroxysteroid dehydrogenase like 1
hsa-miR-1323	0	0	1	1	1	1	CRISPLD2	cysteine-rich secretory protein LCCL domain containing 2
hsa-miR-1323	1	0	1	0	1	1	ITCH	itchy E3 ubiquitin protein ligase
hsa-miR-1323	1	0	1	1	1	1	PCDHA9	protocadherin alpha 9
hsa-miR-1323	1	0	1	0	1	1	PCDHGA8	protocadherin gamma subfamily A, 8
hsa-miR-1323	0	0	1	1	1	1	MAGT1	magnesium transporter 1
hsa-miR-1323	0	0	1	1	1	1	TKTL2	transketolase-like 2
hsa-miR-1323	1	0	1	1	1	1	FBXO30	F-box protein 30
hsa-miR-1323	1	0	1	1	1	1	DSEL	dermatan sulfate epimerase-like
hsa-miR-1323	1	0	1	1	1	1	FAM175B	family with sequence similarity 175, member B
hsa-miR-1323	1	0	1	1	1	1	ARID5B	AT rich interactive domain 5B (MRF1-like)
hsa-miR-1323	1	0	1	0	1	1	FAR1	fatty acyl CoA reductase 1
hsa-miR-1323	1	0	1	1	1	1	SLITRK6	SLIT and NTRK-like family, member 6
hsa-miR-1323	1	0	1	1	1	1	MEX3B	mex-3 homolog B (C. elegans)
hsa-miR-1323	0	0	1	1	1	1	YIPF4	Yip1 domain family, member 4
hsa-miR-1323	1	0	1	1	1	1	SYVN1	synovial apoptosis inhibitor 1, synoviolin
hsa-miR-1323	1	0	1	1	1	1	USP38	ubiquitin specific peptidase 38
hsa-miR-1323	0	0	1	1	1	1	PLA2G12B	phospholipase A2, group XIIB
hsa-miR-1323	0	0	1	1	1	1	RETNLB	resistin like beta
hsa-miR-1323	1	0	1	1	1	1	PPP1R9B	protein phosphatase 1, regulatory subunit 9B
hsa-miR-1323	0	0	1	1	1	1	HAVCR2	hepatitis A virus cellular receptor 2
hsa-miR-1323	1	0	1	1	1	1	ARHGEF39	Rho guanine nucleotide exchange factor (GEF) 39
hsa-miR-1323	0	0	1	1	1	1	POLR2J2	polymerase (RNA) II (DNA directed) polypeptide J2
hsa-miR-1323	1	0	1	1	1	1	PCDH10	protocadherin 10
hsa-miR-1323	1	0	1	1	1	1	PCDH11Y	protocadherin 11 Y-linked
hsa-miR-1323	0	0	1	1	0	0	MUC13	mucin 13, cell surface associated
hsa-miR-1323	1	0	1	1	1	1	TRIM55	tripartite motif containing 55
hsa-miR-1323	1	0	1	1	1	1	NKD1	naked cuticle homolog 1 (Drosophila)
hsa-miR-1323	1	0	1	1	1	1	FOXQ1	forkhead box Q1
hsa-miR-1323	1	0	1	1	1	1	RASL10B	RAS-like, family 10, member B
hsa-miR-1323	1	0	1	1	1	1	SSH2	slingshot homolog 2 (Drosophila)
hsa-miR-1323	1	0	1	1	1	1	TANC1	tetratricopeptide repeat, ankyrin repeat and coiled-coil containing 1
hsa-miR-1323	0	0	1	1	1	1	CTTNBP2	cortactin binding protein 2
hsa-miR-1323	1	0	1	1	1	1	EPT1	ethanolaminephosphotransferase 1 (CDP-ethanolamine-specific)
hsa-miR-1323	1	0	1	1	1	1	LUZP1	leucine zipper protein 1
hsa-miR-1323	1	0	1	1	1	1	SLC2A13	solute carrier family 2 (facilitated glucose transporter), member 13
hsa-miR-1323	0	0	1	0	1	1	CLNK	cytokine-dependent hematopoietic cell linker
hsa-miR-1323	1	0	1	1	1	1	TRIM9	tripartite motif containing 9
hsa-miR-1323	1	0	1	1	1	1	MED12L	mediator complex subunit 12-like
hsa-miR-1323	0	0	1	0	1	1	ZNF518B	zinc finger protein 518B
hsa-miR-1323	1	0	1	1	1	1	SRSF10	serine/arginine-rich splicing factor 10
hsa-miR-1323	1	0	1	1	1	1	NAA15	N(alpha)-acetyltransferase 15, NatA auxiliary subunit
hsa-miR-1323	0	0	1	1	1	1	CCNE2	cyclin E2
hsa-miR-1323	1	0	1	0	1	1	ANTXR2	anthrax toxin receptor 2
hsa-miR-1323	1	0	1	1	1	1	PTP4A2	protein tyrosine phosphatase type IVA, member 2
hsa-miR-1323	1	0	1	1	1	1	SLC44A1	solute carrier family 44, member 1
hsa-miR-1323	0	0	1	1	1	1	CBLN4	cerebellin 4 precursor
hsa-miR-1323	1	0	1	1	1	1	NRSN1	neurensin 1
hsa-miR-1323	1	0	1	1	1	1	ZNF280B	zinc finger protein 280B
hsa-miR-1323	1	0	1	0	1	1	SOCS4	suppressor of cytokine signaling 4
hsa-miR-1323	1	0	1	1	1	1	KLHL6	kelch-like 6 (Drosophila)
hsa-miR-1323	0	0	1	0	1	1	CNTNAP5	contactin associated protein-like 5
hsa-miR-1323	0	0	1	1	0	0	XAGE5	X antigen family, member 5
hsa-miR-1323	1	0	1	1	1	1	PRRC1	proline-rich coiled-coil 1
hsa-miR-1323	0	0	1	1	1	1	WFDC8	WAP four-disulfide core domain 8
hsa-miR-1323	1	0	1	1	1	1	WHSC1	Wolf-Hirschhorn syndrome candidate 1
hsa-miR-1323	1	0	1	1	1	1	BMPER	BMP binding endothelial regulator
hsa-miR-1323	1	0	1	1	1	1	SLC26A7	solute carrier family 26, member 7
hsa-miR-1323	1	0	1	1	1	1	SPTSSA	serine palmitoyltransferase, small subunit A
hsa-miR-1323	0	0	1	1	1	1	PKD1L1	polycystic kidney disease 1 like 1
hsa-miR-1323	1	0	1	1	1	1	PANK1	pantothenate kinase 1
hsa-miR-1323	1	0	1	1	1	1	GLCCI1	glucocorticoid induced transcript 1
hsa-miR-1323	1	0	1	1	1	1	KCTD12	potassium channel tetramerisation domain containing 12
hsa-miR-1323	1	0	1	0	1	1	NUS1	nuclear undecaprenyl pyrophosphate synthase 1 homolog (S. cerevisiae)
hsa-miR-1323	1	0	1	0	1	1	SP1	Sp1 transcription factor
hsa-miR-1323	0	0	1	1	0	0	PPP1R14B	protein phosphatase 1, regulatory (inhibitor) subunit 14B
hsa-miR-1323	1	0	1	0	1	1	FCHO2	FCH domain only 2
hsa-miR-1323	1	0	1	1	1	1	CD200R1	CD200 receptor 1
hsa-miR-1323	0	0	1	1	1	1	PPIL4	peptidylprolyl isomerase (cyclophilin)-like 4
hsa-miR-1323	0	0	1	1	1	1	KCNC2	potassium voltage-gated channel, Shaw-related subfamily, member 2
hsa-miR-1323	0	0	1	1	1	1	STARD4	StAR-related lipid transfer (START) domain containing 4
hsa-miR-1323	1	0	1	1	1	1	TSTD2	thiosulfate sulfurtransferase (rhodanese)-like domain containing 2
hsa-miR-1323	1	0	1	1	1	1	PPTC7	PTC7 protein phosphatase homolog (S. cerevisiae)
hsa-miR-1323	0	0	1	1	0	0	COMTD1	catechol-O-methyltransferase domain containing 1
hsa-miR-1323	1	0	1	1	1	1	TMEM182	transmembrane protein 182
hsa-miR-1323	1	0	1	1	1	1	FAM91A1	family with sequence similarity 91, member A1
hsa-miR-1323	0	0	1	1	1	1	ZFC3H1	zinc finger, C3H1-type containing
hsa-miR-1323	1	0	1	0	1	1	ZBTB47	zinc finger and BTB domain containing 47
hsa-miR-1323	0	0	1	0	1	1	PIGM	phosphatidylinositol glycan anchor biosynthesis, class M
hsa-miR-1323	0	0	1	1	0	0	CSNK1A1L	casein kinase 1, alpha 1-like
hsa-miR-1323	1	0	1	1	1	1	CCSAP	centriole, cilia and spindle-associated protein
hsa-miR-1323	0	0	1	0	1	1	SPATA18	spermatogenesis associated 18
hsa-miR-1323	0	0	1	1	1	1	APOBEC3F	apolipoprotein B mRNA editing enzyme, catalytic polypeptide-like 3F
hsa-miR-1323	0	0	1	0	1	1	OSTCP1	oligosaccharyltransferase complex subunit pseudogene 1
hsa-miR-1323	0	0	1	1	0	0	GSTA1	glutathione S-transferase alpha 1
hsa-miR-1323	1	0	1	0	1	1	MTPN	myotrophin
hsa-miR-1323	1	0	1	1	1	1	SGMS1	sphingomyelin synthase 1
hsa-miR-1323	1	0	1	1	1	1	FAM110B	family with sequence similarity 110, member B
hsa-miR-1323	0	0	1	1	1	1	GLIS1	GLIS family zinc finger 1
hsa-miR-1323	1	0	1	1	1	1	BOD1L1	biorientation of chromosomes in cell division 1-like 1
hsa-miR-1323	1	0	1	1	1	1	UBTD2	ubiquitin domain containing 2
hsa-miR-1323	0	0	1	1	1	1	CHMP4C	charged multivesicular body protein 4C
hsa-miR-1323	0	0	1	1	1	1	ELOVL3	ELOVL fatty acid elongase 3
hsa-miR-1323	0	0	1	1	1	1	DEPDC4	DEP domain containing 4
hsa-miR-1323	0	0	1	1	1	1	EFCAB13	EF-hand calcium binding domain 13
hsa-miR-1323	1	0	1	1	1	1	TBX15	T-box 15
hsa-miR-1323	1	0	1	1	1	1	BHLHE22	basic helix-loop-helix family, member e22
hsa-miR-1323	1	0	1	1	1	1	FAM123B	family with sequence similarity 123B
hsa-miR-1323	1	0	1	1	1	1	FAM81A	family with sequence similarity 81, member A
hsa-miR-1323	0	0	1	1	0	0	TMCO5A	transmembrane and coiled-coil domains 5A
hsa-miR-1323	1	0	1	1	1	1	SPRED1	sprouty-related, EVH1 domain containing 1
hsa-miR-1323	0	0	1	1	1	1	CCER1	coiled-coil glutamate-rich protein 1
hsa-miR-1323	1	0	1	1	1	1	TCTEX1D1	Tctex1 domain containing 1
hsa-miR-1323	1	0	1	0	1	1	TMEM154	transmembrane protein 154
hsa-miR-1323	1	0	1	0	1	1	RWDD4	RWD domain containing 4
hsa-miR-1323	1	0	1	1	1	1	BEND6	BEN domain containing 6
hsa-miR-1323	0	0	1	0	1	1	KBTBD6	kelch repeat and BTB (POZ) domain containing 6
hsa-miR-1323	1	0	1	0	1	1	ST6GALNAC3	ST6 (alpha-N-acetyl-neuraminyl-2,3-beta-galactosyl-1,3)-N-acetylgalactosaminide alpha-2,6-sialyltransferase 3
hsa-miR-1323	1	0	1	0	1	1	KDM1B	lysine (K)-specific demethylase 1B
hsa-miR-1323	1	0	1	0	1	1	TAPT1	transmembrane anterior posterior transformation 1
hsa-miR-1323	1	0	1	1	1	1	CREBRF	CREB3 regulatory factor
hsa-miR-1323	1	0	1	0	1	1	SEMA6D	sema domain, transmembrane domain (TM), and cytoplasmic domain, (semaphorin) 6D
hsa-miR-1323	1	0	1	1	1	1	LCORL	ligand dependent nuclear receptor corepressor-like
hsa-miR-1323	1	0	1	1	1	1	C2orf69	chromosome 2 open reading frame 69
hsa-miR-1323	0	0	1	1	1	1	ANKRD44	ankyrin repeat domain 44
hsa-miR-1323	1	0	1	1	1	1	AQP11	aquaporin 11
hsa-miR-1323	0	0	1	1	1	1	NFATC3	nuclear factor of activated T-cells, cytoplasmic, calcineurin-dependent 3
hsa-miR-1323	1	0	1	1	1	1	MMGT1	membrane magnesium transporter 1
hsa-miR-1323	1	0	1	1	1	1	DCUN1D3	DCN1, defective in cullin neddylation 1, domain containing 3 (S. cerevisiae)
hsa-miR-1323	1	0	1	1	1	1	CCDC117	coiled-coil domain containing 117
hsa-miR-1323	1	0	1	1	1	1	FAM117B	family with sequence similarity 117, member B
hsa-miR-1323	1	0	1	0	1	1	PGM2L1	phosphoglucomutase 2-like 1
hsa-miR-1323	1	0	1	0	1	1	KSR2	kinase suppressor of ras 2
hsa-miR-1323	1	0	1	1	1	1	RIMKLA	ribosomal modification protein rimK-like family member A
hsa-miR-1323	0	0	1	0	1	1	C5orf64	chromosome 5 open reading frame 64
hsa-miR-1323	0	0	1	1	1	1	AQPEP	laeverin
hsa-miR-1323	1	0	1	0	1	1	DPY19L2	dpy-19-like 2 (C. elegans)
hsa-miR-1323	1	0	1	0	1	1	SREK1IP1	SREK1-interacting protein 1
hsa-miR-1323	0	0	1	1	1	1	YIPF6	Yip1 domain family, member 6
hsa-miR-1323	1	0	1	1	1	1	SLC41A1	solute carrier family 41, member 1
hsa-miR-1323	1	0	1	1	1	1	C4orf34	chromosome 4 open reading frame 34
hsa-miR-1323	1	0	1	1	1	1	SCN4B	sodium channel, voltage-gated, type IV, beta subunit
hsa-miR-1323	1	0	1	1	1	1	RAB3IP	RAB3A interacting protein (rabin3)
hsa-miR-1323	1	0	1	1	1	1	OLIG3	oligodendrocyte transcription factor 3
hsa-miR-1323	0	0	1	1	1	1	CHSY3	chondroitin sulfate synthase 3
hsa-miR-1323	0	0	1	1	0	0	C12orf60	chromosome 12 open reading frame 60
hsa-miR-1323	1	0	1	0	1	1	CCDC71L	coiled-coil domain containing 71-like
hsa-miR-1323	1	0	1	1	1	1	INADL	InaD-like (Drosophila)
hsa-miR-1323	1	0	1	1	1	1	PPAP2B	phosphatidic acid phosphatase type 2B
hsa-miR-1323	1	0	1	1	1	1	STX12	syntaxin 12
hsa-miR-1323	1	0	1	1	1	1	PPM1B	protein phosphatase, Mg2+/Mn2+ dependent, 1B
hsa-miR-1323	1	0	1	1	1	1	LRRTM3	leucine rich repeat transmembrane neuronal 3
hsa-miR-1323	1	0	1	1	1	1	PRIMA1	proline rich membrane anchor 1
hsa-miR-1323	0	0	1	1	1	1	ZNF831	zinc finger protein 831
hsa-miR-1323	1	0	1	1	1	1	MB21D2	Mab-21 domain containing 2
hsa-miR-1323	0	0	1	1	1	1	STXBP4	syntaxin binding protein 4
hsa-miR-1323	0	0	1	0	1	1	NAT8L	N-acetyltransferase 8-like (GCN5-related, putative)
hsa-miR-1323	1	0	1	0	1	1	ZDHHC21	zinc finger, DHHC-type containing 21
hsa-miR-1323	1	0	1	1	1	1	MTDH	metadherin
hsa-miR-1323	1	0	1	0	1	1	ARL5B	ADP-ribosylation factor-like 5B
[truncated: 66 more rows]
