# Supplementary material for: Profiling of Selected MicroRNAs in Proliferative Eutopic Endometrium of Women with Ovarian Endometriosis
Source: Biomed Res Int. 2015 Aug 20;2015:760698. doi: 10.1155/2015/760698 (PMC4558423; doi:10.1155/2015/760698)
Supplement: Supplementary file 1 — Table I: The names of miRNAs significantly differentially expressed between eutopic endometrium of patients with endometriosis vs eutopic endometrium of patients without endometriosis. Table II: The associations between miRNA and mRNA, which presents detailed results of the search of six major databases i.e targetscan, tarbase, miranda, mirbase, mirtarget2 and pictar. [file 760698.f1.zip › 760698.f1/Table II/hsa-miR-1324.tsv]

miR	targetscan	tarbase	miranda	mirbase	mirtarget2	pictar	GeneSymbol	GeneName
hsa-miR-1324	1	0	1	1	1	1	ARNTL	aryl hydrocarbon receptor nuclear translocator-like
hsa-miR-1324	1	0	1	1	1	1	CHD9	chromodomain helicase DNA binding protein 9
hsa-miR-1324	1	0	1	1	0	0	HUWE1	HECT, UBA and WWE domain containing 1, E3 ubiquitin protein ligase
hsa-miR-1324	1	0	1	1	0	0	RAPGEF2	Rap guanine nucleotide exchange factor (GEF) 2
hsa-miR-1324	1	0	1	0	1	1	KIAA0355	KIAA0355
hsa-miR-1324	1	0	1	0	1	1	PTPRT	protein tyrosine phosphatase, receptor type, T
hsa-miR-1324	1	0	1	1	1	1	SGSM2	small G protein signaling modulator 2
hsa-miR-1324	0	0	1	1	0	0	PLXNB1	plexin B1
hsa-miR-1324	1	0	1	0	1	1	KIAA0408	KIAA0408
hsa-miR-1324	1	0	1	1	1	1	NUPL1	nucleoporin like 1
hsa-miR-1324	1	0	1	1	1	1	PPIP5K2	diphosphoinositol pentakisphosphate kinase 2
hsa-miR-1324	0	0	1	1	1	1	PREPL	prolyl endopeptidase-like
hsa-miR-1324	1	0	1	0	1	1	NEDD4L	neural precursor cell expressed, developmentally down-regulated 4-like, E3 ubiquitin protein ligase
hsa-miR-1324	1	0	1	1	1	1	RNGTT	RNA guanylyltransferase and 5'-phosphatase
hsa-miR-1324	1	0	1	1	1	1	BAI3	brain-specific angiogenesis inhibitor 3
hsa-miR-1324	1	0	1	1	0	0	PCLO	piccolo (presynaptic cytomatrix protein)
hsa-miR-1324	1	0	1	0	1	1	MFAP3L	microfibrillar-associated protein 3-like
hsa-miR-1324	0	0	1	1	1	1	PHLDB1	pleckstrin homology-like domain, family B, member 1
hsa-miR-1324	1	0	1	1	1	1	GIGYF2	GRB10 interacting GYF protein 2
hsa-miR-1324	0	0	1	1	0	0	FKBP15	FK506 binding protein 15, 133kDa
hsa-miR-1324	0	0	1	1	1	1	XRCC4	X-ray repair complementing defective repair in Chinese hamster cells 4
hsa-miR-1324	0	0	1	1	1	1	GPR116	G protein-coupled receptor 116
hsa-miR-1324	1	0	1	0	1	1	RBM12	RNA binding motif protein 12
hsa-miR-1324	1	0	1	1	1	1	DNM3	dynamin 3
hsa-miR-1324	0	0	1	1	1	1	ZC3H13	zinc finger CCCH-type containing 13
hsa-miR-1324	0	0	1	1	1	1	MAU2	MAU2 chromatid cohesion factor homolog (C. elegans)
hsa-miR-1324	0	0	1	1	1	1	WDR47	WD repeat domain 47
hsa-miR-1324	1	0	1	1	1	1	RNMT	RNA (guanine-7-) methyltransferase
hsa-miR-1324	1	0	1	1	1	1	SEMA4F	sema domain, immunoglobulin domain (Ig), transmembrane domain (TM) and short cytoplasmic domain, (semaphorin) 4F
hsa-miR-1324	0	0	1	1	1	1	ST3GAL6	ST3 beta-galactoside alpha-2,3-sialyltransferase 6
hsa-miR-1324	1	0	1	0	0	0	DTX4	deltex homolog 4 (Drosophila)
hsa-miR-1324	1	0	1	1	1	1	CPEB3	cytoplasmic polyadenylation element binding protein 3
hsa-miR-1324	1	0	1	1	1	1	NLGN4Y	neuroligin 4, Y-linked
hsa-miR-1324	1	0	1	1	1	1	NTNG1	netrin G1
hsa-miR-1324	1	0	1	1	1	1	RPGRIP1L	RPGRIP1-like
hsa-miR-1324	0	0	1	0	1	1	TP53TG3	TP53 target 3
hsa-miR-1324	0	0	1	0	0	0	TP53TG3B	TP53 target 3B
hsa-miR-1324	1	0	1	1	1	1	FOXJ3	forkhead box J3
hsa-miR-1324	0	0	1	0	0	0	ELTD1	EGF, latrophilin and seven transmembrane domain containing 1
hsa-miR-1324	1	0	1	0	1	1	GPR158	G protein-coupled receptor 158
hsa-miR-1324	1	0	1	1	0	0	PPM1H	protein phosphatase, Mg2+/Mn2+ dependent, 1H
hsa-miR-1324	1	0	1	1	1	1	NDRG4	NDRG family member 4
hsa-miR-1324	1	0	1	1	1	1	RALGAPB	Ral GTPase activating protein, beta subunit (non-catalytic)
hsa-miR-1324	1	0	1	1	1	1	MKL2	MKL/myocardin-like 2
hsa-miR-1324	1	0	1	1	1	1	ASAP1	ArfGAP with SH3 domain, ankyrin repeat and PH domain 1
hsa-miR-1324	1	0	1	0	1	1	ANKFY1	ankyrin repeat and FYVE domain containing 1
hsa-miR-1324	0	0	1	1	1	1	FSTL5	follistatin-like 5
hsa-miR-1324	0	0	1	0	0	0	MTA3	metastasis associated 1 family, member 3
hsa-miR-1324	0	0	1	1	1	1	COPS7A	COP9 constitutive photomorphogenic homolog subunit 7A (Arabidopsis)
hsa-miR-1324	1	0	1	0	1	1	KCTD16	potassium channel tetramerisation domain containing 16
hsa-miR-1324	1	0	1	1	1	1	TAOK1	TAO kinase 1
hsa-miR-1324	0	0	1	0	0	0	NYAP2	neuronal tyrosine-phosphorylated phosphoinositide-3-kinase adaptor 2
hsa-miR-1324	1	0	1	1	1	1	INADL	InaD-like (Drosophila)
hsa-miR-1324	1	0	1	0	1	1	IGDCC4	immunoglobulin superfamily, DCC subclass, member 4
hsa-miR-1324	1	0	1	0	0	0	TANC2	tetratricopeptide repeat, ankyrin repeat and coiled-coil containing 2
hsa-miR-1324	0	0	1	1	1	1	BHLHB9	basic helix-loop-helix domain containing, class B, 9
hsa-miR-1324	0	0	1	0	1	1	SETD5	SET domain containing 5
hsa-miR-1324	1	0	1	0	1	1	RIMS1	regulating synaptic membrane exocytosis 1
hsa-miR-1324	1	0	1	0	1	1	JPH4	junctophilin 4
hsa-miR-1324	0	0	1	1	1	1	UNC80	unc-80 homolog (C. elegans)
hsa-miR-1324	0	0	1	0	0	0	KIAA1908	uncharacterized LOC114796
hsa-miR-1324	1	0	1	1	1	1	POGZ	pogo transposable element with ZNF domain
hsa-miR-1324	1	0	1	1	0	0	ZNF292	zinc finger protein 292
hsa-miR-1324	1	0	1	1	1	1	SH3TC2	SH3 domain and tetratricopeptide repeats 2
hsa-miR-1324	0	0	1	1	0	0	CIRH1A	cirrhosis, autosomal recessive 1A (cirhin)
hsa-miR-1324	1	0	1	0	0	0	FAT3	FAT tumor suppressor homolog 3 (Drosophila)
hsa-miR-1324	1	0	1	0	0	0	RNF169	ring finger protein 169
hsa-miR-1324	1	0	1	0	0	0	ZBTB34	zinc finger and BTB domain containing 34
hsa-miR-1324	0	0	1	1	1	1	MCF2	MCF.2 cell line derived transforming sequence
hsa-miR-1324	0	0	1	1	0	0	KREMEN2	kringle containing transmembrane protein 2
hsa-miR-1324	0	0	1	1	0	0	FAM22D	family with sequence similarity 22, member D
hsa-miR-1324	1	0	1	1	1	1	UBR3	ubiquitin protein ligase E3 component n-recognin 3 (putative)
hsa-miR-1324	1	0	1	0	0	0	ZC3H12C	zinc finger CCCH-type containing 12C
hsa-miR-1324	0	0	1	1	0	0	KRTAP24-1	keratin associated protein 24-1
hsa-miR-1324	0	0	1	1	0	0	SSPO	SCO-spondin homolog (Bos taurus)
hsa-miR-1324	1	0	1	0	1	1	BEND4	BEN domain containing 4
hsa-miR-1324	1	0	1	1	1	1	SCN5A	sodium channel, voltage-gated, type V, alpha subunit
hsa-miR-1324	1	0	1	1	1	1	FAT2	FAT tumor suppressor homolog 2 (Drosophila)
hsa-miR-1324	1	1	1	1	1	1	BACE1	beta-site APP-cleaving enzyme 1
hsa-miR-1324	0	0	1	1	1	1	DOCK8	dedicator of cytokinesis 8
hsa-miR-1324	0	0	1	0	1	1	ACE2	angiotensin I converting enzyme (peptidyl-dipeptidase A) 2
hsa-miR-1324	1	0	1	1	1	1	ADARB1	adenosine deaminase, RNA-specific, B1
hsa-miR-1324	1	0	1	1	1	1	VLDLR	very low density lipoprotein receptor
hsa-miR-1324	0	0	1	0	1	1	ATR	ataxia telangiectasia and Rad3 related
hsa-miR-1324	1	0	1	1	1	1	BACH2	BTB and CNC homology 1, basic leucine zipper transcription factor 2
hsa-miR-1324	0	0	1	1	0	0	KCNC3	potassium voltage-gated channel, Shaw-related subfamily, member 3
hsa-miR-1324	1	0	1	1	1	1	PML	promyelocytic leukemia
hsa-miR-1324	1	0	1	1	1	1	PCCB	propionyl CoA carboxylase, beta polypeptide
hsa-miR-1324	0	0	1	1	1	1	DYNC1I2	dynein, cytoplasmic 1, intermediate chain 2
hsa-miR-1324	0	0	1	1	1	1	MAZ	MYC-associated zinc finger protein (purine-binding transcription factor)
hsa-miR-1324	0	0	1	1	1	1	DNM1L	dynamin 1-like
hsa-miR-1324	1	0	1	1	1	1	SLC8A1	solute carrier family 8 (sodium/calcium exchanger), member 1
hsa-miR-1324	1	0	1	1	0	0	GRIA1	glutamate receptor, ionotropic, AMPA 1
hsa-miR-1324	1	0	1	1	1	1	SYNCRIP	synaptotagmin binding, cytoplasmic RNA interacting protein
hsa-miR-1324	0	0	1	1	1	1	DGKI	diacylglycerol kinase, iota
hsa-miR-1324	1	0	1	1	0	0	CACNB1	calcium channel, voltage-dependent, beta 1 subunit
hsa-miR-1324	1	0	1	1	1	1	FMR1	fragile X mental retardation 1
hsa-miR-1324	1	0	1	1	1	1	PRKACB	protein kinase, cAMP-dependent, catalytic, beta
hsa-miR-1324	1	0	1	0	1	1	ETV1	ets variant 1
hsa-miR-1324	1	0	1	1	1	1	REV3L	REV3-like, polymerase (DNA directed), zeta, catalytic subunit
hsa-miR-1324	1	0	1	1	1	1	ABI1	abl-interactor 1
hsa-miR-1324	1	0	1	1	1	1	NEO1	neogenin 1
hsa-miR-1324	1	0	1	1	1	1	MINK1	misshapen-like kinase 1
hsa-miR-1324	0	0	1	1	1	1	PPP1R12C	protein phosphatase 1, regulatory subunit 12C
hsa-miR-1324	0	0	1	1	0	0	PSMB2	proteasome (prosome, macropain) subunit, beta type, 2
hsa-miR-1324	0	0	1	1	0	0	IGFBP2	insulin-like growth factor binding protein 2, 36kDa
hsa-miR-1324	0	0	1	1	0	0	EIF4E2	eukaryotic translation initiation factor 4E family member 2
hsa-miR-1324	0	0	1	1	1	1	GPM6B	glycoprotein M6B
hsa-miR-1324	0	0	1	1	1	1	ZNF747	zinc finger protein 747
hsa-miR-1324	0	0	1	1	1	1	STAU1	staufen, RNA binding protein, homolog 1 (Drosophila)
hsa-miR-1324	0	0	1	1	0	0	HLA-DMB	major histocompatibility complex, class II, DM beta
hsa-miR-1324	1	0	1	1	1	1	ARHGEF3	Rho guanine nucleotide exchange factor (GEF) 3
hsa-miR-1324	1	0	1	1	1	1	COL24A1	collagen, type XXIV, alpha 1
hsa-miR-1324	0	0	1	1	0	0	SLC22A8	solute carrier family 22 (organic anion transporter), member 8
hsa-miR-1324	1	0	1	0	1	1	ADD3	adducin 3 (gamma)
hsa-miR-1324	0	0	1	0	1	1	TGFB2	transforming growth factor, beta 2
hsa-miR-1324	1	0	1	1	1	1	TEAD1	TEA domain family member 1 (SV40 transcriptional enhancer factor)
hsa-miR-1324	1	0	1	1	1	1	OSBPL10	oxysterol binding protein-like 10
hsa-miR-1324	1	0	1	1	1	1	GULP1	GULP, engulfment adaptor PTB domain containing 1
hsa-miR-1324	1	0	1	1	1	1	ZFX	zinc finger protein, X-linked
hsa-miR-1324	0	0	1	1	1	1	PLD1	phospholipase D1, phosphatidylcholine-specific
hsa-miR-1324	1	0	1	1	1	1	MEF2D	myocyte enhancer factor 2D
hsa-miR-1324	1	0	1	1	0	0	TNPO2	transportin 2
hsa-miR-1324	0	0	1	0	0	0	LOC646813	DEAH (Asp-Glu-Ala-His) box polypeptide 9 pseudogene
hsa-miR-1324	0	0	1	0	1	1	PARG	poly (ADP-ribose) glycohydrolase
hsa-miR-1324	1	0	1	1	1	1	YME1L1	YME1-like 1 (S. cerevisiae)
hsa-miR-1324	1	0	1	1	1	1	MYT1L	myelin transcription factor 1-like
hsa-miR-1324	1	0	1	1	0	0	SH2D2A	SH2 domain containing 2A
hsa-miR-1324	1	0	1	1	1	1	POLQ	polymerase (DNA directed), theta
hsa-miR-1324	1	0	1	1	1	1	ZFAND6	zinc finger, AN1-type domain 6
hsa-miR-1324	1	0	1	1	1	1	ERLIN1	ER lipid raft associated 1
hsa-miR-1324	1	0	1	1	1	1	NUDT4	nudix (nucleoside diphosphate linked moiety X)-type motif 4
hsa-miR-1324	1	0	1	1	1	1	CBFA2T2	core-binding factor, runt domain, alpha subunit 2; translocated to, 2
hsa-miR-1324	1	0	1	1	1	1	PDE4A	phosphodiesterase 4A, cAMP-specific
hsa-miR-1324	1	0	1	1	1	1	VAPB	VAMP (vesicle-associated membrane protein)-associated protein B and C
hsa-miR-1324	1	0	1	0	1	1	CELF2	CUGBP, Elav-like family member 2
hsa-miR-1324	1	0	1	1	1	1	GLS	glutaminase
hsa-miR-1324	1	0	1	1	1	1	SLMAP	sarcolemma associated protein
hsa-miR-1324	0	0	1	1	0	0	RBM5	RNA binding motif protein 5
hsa-miR-1324	1	0	1	1	1	1	KAT6B	K(lysine) acetyltransferase 6B
hsa-miR-1324	1	0	1	1	1	1	EDNRB	endothelin receptor type B
hsa-miR-1324	1	0	1	1	1	1	LRRFIP1	leucine rich repeat (in FLII) interacting protein 1
hsa-miR-1324	1	0	1	1	1	1	PRUNE	prune homolog (Drosophila)
hsa-miR-1324	0	0	1	1	0	0	SERPINI2	serpin peptidase inhibitor, clade I (pancpin), member 2
hsa-miR-1324	1	0	1	0	1	1	WDR82	WD repeat domain 82
hsa-miR-1324	1	0	1	1	1	1	AASDHPPT	aminoadipate-semialdehyde dehydrogenase-phosphopantetheinyl transferase
hsa-miR-1324	1	0	1	0	1	1	BECN1	beclin 1, autophagy related
hsa-miR-1324	1	0	1	1	1	1	HMG20A	high mobility group 20A
hsa-miR-1324	1	0	1	1	1	1	C14orf129	chromosome 14 open reading frame 129
hsa-miR-1324	0	0	1	1	1	1	CNPPD1	cyclin Pas1/PHO80 domain containing 1
hsa-miR-1324	1	0	1	1	1	1	USP15	ubiquitin specific peptidase 15
hsa-miR-1324	1	0	1	1	1	1	ZNF202	zinc finger protein 202
hsa-miR-1324	0	0	1	0	1	1	PDP1	pyruvate dehyrogenase phosphatase catalytic subunit 1
hsa-miR-1324	1	0	1	1	0	0	ZCCHC4	zinc finger, CCHC domain containing 4
hsa-miR-1324	0	0	1	1	0	0	BBX	bobby sox homolog (Drosophila)
hsa-miR-1324	1	0	1	1	1	1	USP25	ubiquitin specific peptidase 25
hsa-miR-1324	1	0	1	1	1	1	C16orf70	chromosome 16 open reading frame 70
hsa-miR-1324	1	0	1	1	1	1	BCL2L13	BCL2-like 13 (apoptosis facilitator)
hsa-miR-1324	1	0	1	1	1	1	SNPH	syntaphilin
hsa-miR-1324	1	0	1	1	1	1	MYLIP	myosin regulatory light chain interacting protein
hsa-miR-1324	0	0	1	1	1	1	SLC30A5	solute carrier family 30 (zinc transporter), member 5
hsa-miR-1324	0	0	1	1	1	1	CSNK1A1	casein kinase 1, alpha 1
hsa-miR-1324	1	0	1	1	1	1	OGT	O-linked N-acetylglucosamine (GlcNAc) transferase
hsa-miR-1324	1	0	1	1	0	0	TDRKH	tudor and KH domain containing
hsa-miR-1324	1	0	1	1	1	1	DESI2	desumoylating isopeptidase 2
hsa-miR-1324	0	0	1	0	0	0	TIGD7	tigger transposable element derived 7
hsa-miR-1324	0	0	1	1	1	1	RANGRF	RAN guanine nucleotide release factor
hsa-miR-1324	0	0	1	1	1	1	ZNF331	zinc finger protein 331
hsa-miR-1324	1	0	1	1	1	1	PCDH11Y	protocadherin 11 Y-linked
hsa-miR-1324	1	0	1	1	1	1	TAGLN3	transgelin 3
hsa-miR-1324	1	0	1	1	1	1	DCLRE1B	DNA cross-link repair 1B
hsa-miR-1324	1	0	1	1	1	1	SPTBN4	spectrin, beta, non-erythrocytic 4
hsa-miR-1324	0	0	1	1	0	0	IL17F	interleukin 17F
hsa-miR-1324	1	0	1	1	1	1	BIVM	basic, immunoglobulin-like variable motif containing
hsa-miR-1324	1	0	1	0	1	1	USP32	ubiquitin specific peptidase 32
hsa-miR-1324	1	0	1	1	1	1	PBX3	pre-B-cell leukemia homeobox 3
hsa-miR-1324	1	0	1	1	1	1	CASD1	CAS1 domain containing 1
hsa-miR-1324	1	0	1	0	1	1	WIPF2	WAS/WASL interacting protein family, member 2
hsa-miR-1324	0	0	1	0	0	0	NBPF10	neuroblastoma breakpoint family, member 10
hsa-miR-1324	0	0	1	1	1	1	CASP8	caspase 8, apoptosis-related cysteine peptidase
hsa-miR-1324	0	0	1	0	1	1	MYO3B	myosin IIIB
hsa-miR-1324	1	0	1	1	1	1	RCAN1	regulator of calcineurin 1
hsa-miR-1324	1	0	1	1	1	1	MAGI1	membrane associated guanylate kinase, WW and PDZ domain containing 1
hsa-miR-1324	0	0	1	1	1	1	SPSB1	splA/ryanodine receptor domain and SOCS box containing 1
hsa-miR-1324	1	0	1	1	1	1	NTRK2	neurotrophic tyrosine kinase, receptor, type 2
hsa-miR-1324	0	0	1	1	0	0	CNKSR2	connector enhancer of kinase suppressor of Ras 2
hsa-miR-1324	0	0	1	1	0	0	CLEC18A	C-type lectin domain family 18, member A
hsa-miR-1324	0	0	1	1	0	0	CLEC18C	C-type lectin domain family 18, member C
hsa-miR-1324	1	0	1	1	1	1	RBFOX1	RNA binding protein, fox-1 homolog (C. elegans) 1
hsa-miR-1324	0	0	1	1	1	1	CSPG5	chondroitin sulfate proteoglycan 5 (neuroglycan C)
hsa-miR-1324	1	0	1	1	1	1	AKIP1	A kinase (PRKA) interacting protein 1
hsa-miR-1324	0	0	1	1	1	1	AMPH	amphiphysin
hsa-miR-1324	0	0	1	1	0	0	MPI	mannose phosphate isomerase
hsa-miR-1324	1	0	1	1	0	0	ST3GAL4	ST3 beta-galactoside alpha-2,3-sialyltransferase 4
hsa-miR-1324	1	0	1	1	1	1	AFF2	AF4/FMR2 family, member 2
hsa-miR-1324	0	0	1	1	1	1	GLRX3	glutaredoxin 3
hsa-miR-1324	1	0	1	1	1	1	ZNF281	zinc finger protein 281
hsa-miR-1324	1	0	1	1	1	1	SUCO	SUN domain containing ossification factor
hsa-miR-1324	0	0	1	1	1	1	CD1E	CD1e molecule
hsa-miR-1324	0	0	1	1	1	1	CHST11	carbohydrate (chondroitin 4) sulfotransferase 11
hsa-miR-1324	0	0	1	1	1	1	WWTR1	WW domain containing transcription regulator 1
hsa-miR-1324	0	0	1	0	0	0	CD177	CD177 molecule
hsa-miR-1324	1	0	1	1	1	1	PALM2	paralemmin 2
hsa-miR-1324	1	0	1	1	1	1	NRXN3	neurexin 3
hsa-miR-1324	1	0	1	1	1	1	NAV3	neuron navigator 3
hsa-miR-1324	1	0	1	1	1	1	PPP3CB	protein phosphatase 3, catalytic subunit, beta isozyme
hsa-miR-1324	0	0	1	1	1	1	ZNF248	zinc finger protein 248
hsa-miR-1324	0	0	1	1	1	1	SLC25A13	solute carrier family 25 (aspartate/glutamate carrier), member 13
hsa-miR-1324	0	0	1	1	0	0	KIAA1324	KIAA1324
hsa-miR-1324	1	0	1	1	1	1	PCDH11X	protocadherin 11 X-linked
hsa-miR-1324	1	0	1	1	1	1	ARL4C	ADP-ribosylation factor-like 4C
hsa-miR-1324	0	0	1	1	0	0	ACSS2	acyl-CoA synthetase short-chain family member 2
hsa-miR-1324	1	0	1	0	1	1	NFAT5	nuclear factor of activated T-cells 5, tonicity-responsive
hsa-miR-1324	0	0	1	0	0	0	TUG1	taurine upregulated 1 (non-protein coding)
hsa-miR-1324	0	0	1	1	1	1	PARPBP	PARP1 binding protein
hsa-miR-1324	0	0	1	1	1	1	OLFM4	olfactomedin 4
hsa-miR-1324	1	0	1	1	1	1	ZC3H7A	zinc finger CCCH-type containing 7A
hsa-miR-1324	0	0	1	1	0	0	AP4B1	adaptor-related protein complex 4, beta 1 subunit
hsa-miR-1324	0	0	1	0	1	1	EBF2	early B-cell factor 2
hsa-miR-1324	0	0	1	1	1	1	STOX2	storkhead box 2
hsa-miR-1324	1	0	1	0	1	1	VPS13D	vacuolar protein sorting 13 homolog D (S. cerevisiae)
hsa-miR-1324	1	0	1	1	1	1	EIF2C1	eukaryotic translation initiation factor 2C, 1
hsa-miR-1324	1	0	1	1	1	1	PTBP3	polypyrimidine tract binding protein 3
hsa-miR-1324	1	0	1	1	1	1	WDTC1	WD and tetratricopeptide repeats 1
hsa-miR-1324	1	0	1	1	1	1	MBD5	methyl-CpG binding domain protein 5
hsa-miR-1324	0	0	1	1	0	0	TFR2	transferrin receptor 2
hsa-miR-1324	1	0	1	1	1	1	MON2	MON2 homolog (S. cerevisiae)
hsa-miR-1324	1	0	1	0	0	0	ZNRF3	zinc and ring finger 3
hsa-miR-1324	0	0	1	1	1	1	INPP5B	inositol polyphosphate-5-phosphatase, 75kDa
hsa-miR-1324	0	0	1	1	0	0	JMJD4	jumonji domain containing 4
hsa-miR-1324	1	0	1	1	1	1	SMEK2	SMEK homolog 2, suppressor of mek1 (Dictyostelium)
hsa-miR-1324	1	0	1	1	1	1	STARD7	StAR-related lipid transfer (START) domain containing 7
hsa-miR-1324	0	0	1	1	1	1	VPRBP	Vpr (HIV-1) binding protein
hsa-miR-1324	1	0	1	1	1	1	MACF1	microtubule-actin crosslinking factor 1
hsa-miR-1324	1	0	1	1	1	1	SRP72	signal recognition particle 72kDa
hsa-miR-1324	0	0	1	1	1	1	C14orf118	chromosome 14 open reading frame 118
hsa-miR-1324	0	0	1	0	0	0	LINC00475	long intergenic non-protein coding RNA 475
hsa-miR-1324	1	0	1	1	1	1	POMT2	protein-O-mannosyltransferase 2
hsa-miR-1324	1	0	1	0	1	1	C14orf101	chromosome 14 open reading frame 101
hsa-miR-1324	1	0	1	1	0	0	MEX3A	mex-3 homolog A (C. elegans)
hsa-miR-1324	0	0	1	1	1	1	CDKAL1	CDK5 regulatory subunit associated protein 1-like 1
hsa-miR-1324	0	0	1	0	1	1	FLJ14186	uncharacterized LOC401149
hsa-miR-1324	1	0	1	1	1	1	COPS7B	COP9 constitutive photomorphogenic homolog subunit 7B (Arabidopsis)
hsa-miR-1324	1	0	1	1	1	1	DYRK2	dual-specificity tyrosine-(Y)-phosphorylation regulated kinase 2
hsa-miR-1324	0	0	1	1	0	0	EIF4ENIF1	eukaryotic translation initiation factor 4E nuclear import factor 1
hsa-miR-1324	0	0	1	0	1	1	ATXN1L	ataxin 1-like
hsa-miR-1324	1	0	1	1	1	1	DENND4C	DENN/MADD domain containing 4C
hsa-miR-1324	1	0	1	1	1	1	YPEL5	yippee-like 5 (Drosophila)
hsa-miR-1324	1	0	1	1	1	1	SUN1	Sad1 and UNC84 domain containing 1
hsa-miR-1324	1	0	1	1	1	1	NAA30	N(alpha)-acetyltransferase 30, NatC catalytic subunit
hsa-miR-1324	1	0	1	0	1	1	ZCCHC3	zinc finger, CCHC domain containing 3
hsa-miR-1324	0	0	1	0	0	0	NEURL1B	neuralized homolog 1B (Drosophila)
hsa-miR-1324	1	0	1	1	1	1	TAF7L	TAF7-like RNA polymerase II, TATA box binding protein (TBP)-associated factor, 50kDa
hsa-miR-1324	1	0	1	1	1	1	FBXL12	F-box and leucine-rich repeat protein 12
hsa-miR-1324	0	0	1	1	1	1	RNF146	ring finger protein 146
hsa-miR-1324	1	0	1	1	1	1	FAM40A	family with sequence similarity 40, member A
hsa-miR-1324	1	0	1	1	1	1	SLC38A1	solute carrier family 38, member 1
hsa-miR-1324	0	0	1	0	0	0	FAM185A	family with sequence similarity 185, member A
hsa-miR-1324	1	0	1	1	1	1	RAP1GDS1	RAP1, GTP-GDP dissociation stimulator 1
hsa-miR-1324	1	0	1	1	1	1	SGK1	serum/glucocorticoid regulated kinase 1
hsa-miR-1324	1	0	1	0	1	1	AP1G1	adaptor-related protein complex 1, gamma 1 subunit
hsa-miR-1324	1	0	1	1	1	1	DLGAP4	discs, large (Drosophila) homolog-associated protein 4
hsa-miR-1324	1	0	1	1	0	0	SPEG	SPEG complex locus
hsa-miR-1324	0	0	1	0	0	0	SNHG11	small nucleolar RNA host gene 11 (non-protein coding)
hsa-miR-1324	1	0	1	1	1	1	FRMD6	FERM domain containing 6
hsa-miR-1324	1	0	1	1	1	1	SFXN2	sideroflexin 2
hsa-miR-1324	0	0	1	1	1	1	GLYATL1	glycine-N-acyltransferase-like 1
hsa-miR-1324	0	0	1	1	0	0	LRCH3	leucine-rich repeats and calponin homology (CH) domain containing 3
hsa-miR-1324	0	0	1	0	0	0	LOC201617	uncharacterized LOC201617
hsa-miR-1324	0	0	1	0	0	0	LOC149684	uncharacterized LOC149684
hsa-miR-1324	1	0	1	1	1	1	DIXDC1	DIX domain containing 1
hsa-miR-1324	1	0	1	1	1	1	TMTC1	transmembrane and tetratricopeptide repeat containing 1
hsa-miR-1324	1	0	1	1	0	0	MEPCE	methylphosphate capping enzyme
hsa-miR-1324	0	0	1	1	1	1	ANKRD36B	ankyrin repeat domain 36B
hsa-miR-1324	1	0	1	1	0	0	SH2D3C	SH2 domain containing 3C
hsa-miR-1324	0	0	1	1	0	0	ANXA11	annexin A11
hsa-miR-1324	1	0	1	0	1	1	PTPRE	protein tyrosine phosphatase, receptor type, E
hsa-miR-1324	1	0	1	1	0	0	SLC26A6	solute carrier family 26, member 6
hsa-miR-1324	1	0	1	1	1	1	SCAMP5	secretory carrier membrane protein 5
hsa-miR-1324	1	0	1	1	1	1	CLCN5	chloride channel, voltage-sensitive 5
hsa-miR-1324	1	0	1	1	0	0	SRL	sarcalumenin
hsa-miR-1324	0	0	1	1	0	0	BTN2A3P	butyrophilin, subfamily 2, member A3, pseudogene
hsa-miR-1324	0	0	1	1	0	0	AARSD1	alanyl-tRNA synthetase domain containing 1
hsa-miR-1324	1	0	1	1	1	1	MGAT1	mannosyl (alpha-1,3-)-glycoprotein beta-1,2-N-acetylglucosaminyltransferase
hsa-miR-1324	0	0	1	1	1	1	PSME3	proteasome (prosome, macropain) activator subunit 3 (PA28 gamma; Ki)
hsa-miR-1324	1	0	1	1	1	1	TLE4	transducin-like enhancer of split 4 (E(sp1) homolog, Drosophila)
hsa-miR-1324	0	0	1	1	0	0	TEX11	testis expressed 11
hsa-miR-1324	0	0	1	1	0	0	DMRTC2	DMRT-like family C2
hsa-miR-1324	1	0	1	0	1	1	NCAM1	neural cell adhesion molecule 1
hsa-miR-1324	0	0	1	1	1	1	SEC61A2	Sec61 alpha 2 subunit (S. cerevisiae)
hsa-miR-1324	0	0	1	1	1	1	FXC1	fracture callus 1 homolog (rat)
hsa-miR-1324	0	0	1	0	1	1	CCDC68	coiled-coil domain containing 68
hsa-miR-1324	0	0	1	1	0	0	ANKAR	ankyrin and armadillo repeat containing
hsa-miR-1324	0	0	1	0	1	1	UHMK1	U2AF homology motif (UHM) kinase 1
hsa-miR-1324	1	0	1	1	1	1	FAM102A	family with sequence similarity 102, member A
hsa-miR-1324	0	0	1	1	0	0	SYTL1	synaptotagmin-like 1
hsa-miR-1324	1	0	1	1	1	1	HLF	hepatic leukemia factor
hsa-miR-1324	0	0	1	1	1	1	HDAC8	histone deacetylase 8
hsa-miR-1324	0	0	1	1	1	1	PKIB	protein kinase (cAMP-dependent, catalytic) inhibitor beta
hsa-miR-1324	1	0	1	1	1	1	PNISR	PNN-interacting serine/arginine-rich protein
hsa-miR-1324	1	0	1	0	1	1	TPBG	trophoblast glycoprotein
hsa-miR-1324	0	0	1	0	0	0	VPS33B	vacuolar protein sorting 33 homolog B (yeast)
hsa-miR-1324	1	0	1	1	1	1	MYO1B	myosin IB
hsa-miR-1324	1	0	1	1	1	1	UXS1	UDP-glucuronate decarboxylase 1
hsa-miR-1324	0	0	1	0	1	1	CADM1	cell adhesion molecule 1
hsa-miR-1324	0	0	1	0	0	0	LOC643837	uncharacterized LOC643837
hsa-miR-1324	0	0	1	0	0	0	SEC14L2	SEC14-like 2 (S. cerevisiae)
hsa-miR-1324	1	0	1	1	1	1	FRY	furry homolog (Drosophila)
hsa-miR-1324	1	0	1	1	1	1	AMMECR1	Alport syndrome, mental retardation, midface hypoplasia and elliptocytosis chromosomal region gene 1
hsa-miR-1324	0	0	1	0	1	1	PIANP	PILR alpha associated neural protein
hsa-miR-1324	0	0	1	0	0	0	LOC440910	uncharacterized LOC440910
hsa-miR-1324	1	0	1	1	1	1	FBXW2	F-box and WD repeat domain containing 2
hsa-miR-1324	1	0	1	0	1	1	RNF114	ring finger protein 114
hsa-miR-1324	1	0	1	1	1	1	LUC7L2	LUC7-like 2 (S. cerevisiae)
hsa-miR-1324	0	0	1	1	0	0	RUVBL1	RuvB-like 1 (E. coli)
hsa-miR-1324	1	0	1	0	1	1	CRTAP	cartilage associated protein
hsa-miR-1324	1	0	1	1	1	1	CLGN	calmegin
hsa-miR-1324	0	0	1	1	1	1	NCBP2	nuclear cap binding protein subunit 2, 20kDa
hsa-miR-1324	0	0	1	0	0	0	LOC283887	uncharacterized LOC283887
hsa-miR-1324	1	0	1	1	1	1	RRBP1	ribosome binding protein 1 homolog 180kDa (dog)
hsa-miR-1324	1	0	1	1	1	1	SARM1	sterile alpha and TIR motif containing 1
hsa-miR-1324	0	0	1	1	1	1	LZTFL1	leucine zipper transcription factor-like 1
hsa-miR-1324	0	0	1	0	0	0	LOC257358	uncharacterized LOC257358
hsa-miR-1324	1	0	1	1	1	1	SPTBN1	spectrin, beta, non-erythrocytic 1
hsa-miR-1324	0	0	1	1	0	0	MAD2L2	MAD2 mitotic arrest deficient-like 2 (yeast)
hsa-miR-1324	0	0	1	1	1	1	SPOCK1	sparc/osteonectin, cwcv and kazal-like domains proteoglycan (testican) 1
hsa-miR-1324	0	0	1	0	0	0	PART1	prostate androgen-regulated transcript 1 (non-protein coding)
hsa-miR-1324	1	0	1	1	1	1	SLC7A8	solute carrier family 7 (amino acid transporter light chain, L system), member 8
hsa-miR-1324	1	0	1	1	1	1	NSG1	neuron specific gene family member 1
hsa-miR-1324	1	0	1	1	1	1	SYT1	synaptotagmin I
hsa-miR-1324	1	0	1	1	1	1	SIAH1	siah E3 ubiquitin protein ligase 1
hsa-miR-1324	0	0	1	1	0	0	IL11RA	interleukin 11 receptor, alpha
hsa-miR-1324	1	0	1	0	1	1	NCOA7	nuclear receptor coactivator 7
hsa-miR-1324	0	0	1	0	0	0	LINC00340	long intergenic non-protein coding RNA 340
hsa-miR-1324	1	0	1	1	1	1	GALNTL2	UDP-N-acetyl-alpha-D-galactosamine:polypeptide N-acetylgalactosaminyltransferase-like 2
hsa-miR-1324	0	0	1	1	0	0	CES4A	carboxylesterase 4A
hsa-miR-1324	0	0	1	1	1	1	METTL13	methyltransferase like 13
hsa-miR-1324	0	0	1	0	1	1	AGBL4	ATP/GTP binding protein-like 4
hsa-miR-1324	1	0	1	1	1	1	CPNE8	copine VIII
hsa-miR-1324	1	0	1	1	1	1	RASGEF1A	RasGEF domain family, member 1A
hsa-miR-1324	0	0	1	1	0	0	HPN	hepsin
hsa-miR-1324	0	0	1	1	1	1	CHRM5	cholinergic receptor, muscarinic 5
hsa-miR-1324	1	0	1	1	1	1	KCNIP3	Kv channel interacting protein 3, calsenilin
hsa-miR-1324	1	0	1	0	1	1	FAM129A	family with sequence similarity 129, member A
hsa-miR-1324	1	0	1	1	1	1	SPATS2	spermatogenesis associated, serine-rich 2
hsa-miR-1324	0	0	1	0	1	1	NBPF3	neuroblastoma breakpoint family, member 3
hsa-miR-1324	1	0	1	0	1	1	NAA60	N(alpha)-acetyltransferase 60, NatF catalytic subunit
hsa-miR-1324	0	0	1	0	1	1	HDAC9	histone deacetylase 9
hsa-miR-1324	1	0	1	0	1	1	STC2	stanniocalcin 2
hsa-miR-1324	1	0	1	1	1	1	PEA15	phosphoprotein enriched in astrocytes 15
hsa-miR-1324	0	0	1	1	0	0	MXRA8	matrix-remodelling associated 8
hsa-miR-1324	0	0	1	1	0	0	C11orf74	chromosome 11 open reading frame 74
hsa-miR-1324	1	0	1	1	1	1	EPB41L4A	erythrocyte membrane protein band 4.1 like 4A
hsa-miR-1324	1	0	1	1	1	1	ACSL1	acyl-CoA synthetase long-chain family member 1
hsa-miR-1324	0	0	1	1	1	1	CDKN2AIP	CDKN2A interacting protein
hsa-miR-1324	0	0	1	1	1	1	RPE	ribulose-5-phosphate-3-epimerase
hsa-miR-1324	1	0	1	1	1	1	GAPVD1	GTPase activating protein and VPS9 domains 1
hsa-miR-1324	0	0	1	0	0	0	ZNF815P	zinc finger protein 815, pseudogene
hsa-miR-1324	1	0	1	1	1	1	CRTC2	CREB regulated transcription coactivator 2
hsa-miR-1324	0	0	1	0	0	0	OTUD1	OTU domain containing 1
hsa-miR-1324	0	0	1	0	1	1	FLJ39080	uncharacterized LOC441355
hsa-miR-1324	1	0	1	1	1	1	HDGF	hepatoma-derived growth factor
hsa-miR-1324	1	0	1	0	1	1	KIAA1737	KIAA1737
hsa-miR-1324	1	0	1	0	1	1	THRB	thyroid hormone receptor, beta
hsa-miR-1324	1	0	1	0	0	0	PID1	phosphotyrosine interaction domain containing 1
hsa-miR-1324	1	0	1	1	1	1	CCDC141	coiled-coil domain containing 141
hsa-miR-1324	1	0	1	1	1	1	ETS2	v-ets erythroblastosis virus E26 oncogene homolog 2 (avian)
hsa-miR-1324	1	0	1	1	1	1	STIM2	stromal interaction molecule 2
hsa-miR-1324	0	0	1	0	0	0	FLJ39534	uncharacterized FLJ39534
hsa-miR-1324	0	0	1	0	1	1	FLJ39639	uncharacterized protein FLJ39639
hsa-miR-1324	0	0	1	0	0	0	CCDC150	coiled-coil domain containing 150
hsa-miR-1324	0	0	1	0	0	0	LOC400680	uncharacterized LOC400680
hsa-miR-1324	1	0	1	0	1	1	AGFG1	ArfGAP with FG repeats 1
hsa-miR-1324	0	0	1	1	1	1	TEX35	testis expressed 35
hsa-miR-1324	1	0	1	1	1	1	GOLGA8B	golgin A8 family, member B
hsa-miR-1324	1	0	1	1	1	1	IGSF11	immunoglobulin superfamily, member 11
hsa-miR-1324	0	0	1	1	0	0	PSAPL1	prosaposin-like 1 (gene/pseudogene)
hsa-miR-1324	1	0	1	1	1	1	VAV3	vav 3 guanine nucleotide exchange factor
hsa-miR-1324	0	0	1	0	0	0	HLA-DQB2	major histocompatibility complex, class II, DQ beta 2
hsa-miR-1324	1	0	1	1	1	1	CHD6	chromodomain helicase DNA binding protein 6
hsa-miR-1324	0	0	1	1	1	1	RGS14	regulator of G-protein signaling 14
hsa-miR-1324	0	0	1	1	1	1	ANKZF1	ankyrin repeat and zinc finger domain containing 1
hsa-miR-1324	0	0	1	1	1	1	ARFGAP2	ADP-ribosylation factor GTPase activating protein 2
hsa-miR-1324	1	0	1	1	1	1	SLC39A13	solute carrier family 39 (zinc transporter), member 13
hsa-miR-1324	0	0	1	0	0	0	LOC728095	uncharacterized LOC728095
hsa-miR-1324	1	0	1	0	1	1	UNC5D	unc-5 homolog D (C. elegans)
hsa-miR-1324	1	0	1	1	1	1	ACSL6	acyl-CoA synthetase long-chain family member 6
hsa-miR-1324	1	0	1	1	1	1	AGAP2	ArfGAP with GTPase domain, ankyrin repeat and PH domain 2
hsa-miR-1324	1	0	1	1	1	1	WEE1	WEE1 homolog (S. pombe)
hsa-miR-1324	1	0	1	1	0	0	CACNB3	calcium channel, voltage-dependent, beta 3 subunit
hsa-miR-1324	1	0	1	1	1	1	ZNF25	zinc finger protein 25
hsa-miR-1324	0	0	1	1	0	0	SLC26A10	solute carrier family 26, member 10
hsa-miR-1324	0	0	1	1	0	0	DCLK3	doublecortin-like kinase 3
hsa-miR-1324	1	0	1	1	1	1	KALRN	kalirin, RhoGEF kinase
hsa-miR-1324	0	0	1	1	1	1	DNAJC24	DnaJ (Hsp40) homolog, subfamily C, member 24
hsa-miR-1324	0	0	1	0	0	0	C1orf132	chromosome 1 open reading frame 132
hsa-miR-1324	1	0	1	0	1	1	KCNK2	potassium channel, subfamily K, member 2
hsa-miR-1324	0	0	1	1	1	1	CC2D2B	coiled-coil and C2 domain containing 2B
hsa-miR-1324	0	0	1	0	0	0	LGALS17A	Charcot-Leyden crystal protein pseudogene
hsa-miR-1324	0	0	1	0	0	0	TMPRSS11BNL	TMPRSS11B N terminal-like
hsa-miR-1324	0	0	1	1	1	1	FAM19A2	family with sequence similarity 19 (chemokine (C-C motif)-like), member A2
hsa-miR-1324	0	0	1	0	0	0	LOC650368	asparagine-linked glycosylation 1-like pseudogene
hsa-miR-1324	1	0	1	1	1	1	FAM219A	family with sequence similarity 219, member A
hsa-miR-1324	0	0	1	0	0	0	LOC285043	uncharacterized LOC285043
hsa-miR-1324	1	0	1	1	1	1	SH2D4B	SH2 domain containing 4B
hsa-miR-1324	0	0	1	1	1	1	SLC9A1	solute carrier family 9, subfamily A (NHE1, cation proton antiporter 1), member 1
hsa-miR-1324	0	0	1	1	0	0	C20orf27	chromosome 20 open reading frame 27
hsa-miR-1324	1	0	1	0	1	1	DCUN1D4	DCN1, defective in cullin neddylation 1, domain containing 4 (S. cerevisiae)
hsa-miR-1324	0	0	1	1	1	1	QDPR	quinoid dihydropteridine reductase
hsa-miR-1324	1	0	1	1	1	1	ADIPOR1	adiponectin receptor 1
hsa-miR-1324	0	0	1	1	0	0	NPIP	nuclear pore complex interacting protein
hsa-miR-1324	0	0	1	0	0	0	EML6	echinoderm microtubule associated protein like 6
hsa-miR-1324	1	0	1	1	1	1	FAM122B	family with sequence similarity 122B
hsa-miR-1324	1	0	1	1	1	1	KIF21A	kinesin family member 21A
hsa-miR-1324	1	0	1	1	1	1	PLEKHH1	pleckstrin homology domain containing, family H (with MyTH4 domain) member 1
hsa-miR-1324	1	0	1	1	1	1	CELF6	CUGBP, Elav-like family member 6
hsa-miR-1324	0	0	1	1	1	1	C2orf91	chromosome 2 open reading frame 91
hsa-miR-1324	1	0	1	1	1	1	C17orf85	chromosome 17 open reading frame 85
hsa-miR-1324	1	0	1	1	1	1	C11orf30	chromosome 11 open reading frame 30
hsa-miR-1324	1	0	1	1	1	1	ATXN7	ataxin 7
hsa-miR-1324	0	0	1	1	0	0	LOC100128239	uncharacterized LOC100128239
hsa-miR-1324	0	0	1	1	1	1	MKX	mohawk homeobox
hsa-miR-1324	1	0	1	1	1	1	SACS	spastic ataxia of Charlevoix-Saguenay (sacsin)
hsa-miR-1324	1	0	1	1	1	1	KTN1	kinectin 1 (kinesin receptor)
hsa-miR-1324	1	0	1	1	1	1	KPNA1	karyopherin alpha 1 (importin alpha 5)
hsa-miR-1324	0	0	1	1	1	1	C11orf45	chromosome 11 open reading frame 45
hsa-miR-1324	1	0	1	0	0	0	MSL1	male-specific lethal 1 homolog (Drosophila)
hsa-miR-1324	0	0	1	0	1	1	CTBP1-AS1	CTBP1 antisense RNA 1
hsa-miR-1324	0	0	1	0	0	0	FAM95B1	family with sequence similarity 95, member B1
hsa-miR-1324	1	0	1	1	1	1	MACROD2	MACRO domain containing 2
hsa-miR-1324	1	0	1	1	1	1	DCTN4	dynactin 4 (p62)
hsa-miR-1324	1	0	1	0	1	1	PLXNA1	plexin A1
hsa-miR-1324	1	0	1	1	0	0	ATXN7L3	ataxin 7-like 3
hsa-miR-1324	1	0	1	1	1	1	PTPRB	protein tyrosine phosphatase, receptor type, B
hsa-miR-1324	0	0	1	1	1	1	RBM39	RNA binding motif protein 39
hsa-miR-1324	1	0	1	1	1	1	DPY19L3	dpy-19-like 3 (C. elegans)
hsa-miR-1324	1	0	1	1	1	1	PLEKHB2	pleckstrin homology domain containing, family B (evectins) member 2
hsa-miR-1324	1	0	1	1	1	1	PIK3R1	phosphoinositide-3-kinase, regulatory subunit 1 (alpha)
hsa-miR-1324	1	0	1	0	1	1	ANO6	anoctamin 6
hsa-miR-1324	0	0	1	1	0	0	CLDN4	claudin 4
hsa-miR-1324	0	0	1	1	1	1	RHPN2	rhophilin, Rho GTPase binding protein 2
hsa-miR-1324	0	0	1	1	0	0	LLGL2	lethal giant larvae homolog 2 (Drosophila)
hsa-miR-1324	1	0	1	1	1	1	DMXL1	Dmx-like 1
hsa-miR-1324	1	0	1	1	1	1	DLG2	discs, large homolog 2 (Drosophila)
hsa-miR-1324	0	0	1	0	0	0	HNRNPKP3	heterogeneous nuclear ribonucleoprotein K pseudogene 3
hsa-miR-1324	0	0	1	1	0	0	HS3ST5	heparan sulfate (glucosamine) 3-O-sulfotransferase 5
hsa-miR-1324	1	0	1	1	1	1	C14orf28	chromosome 14 open reading frame 28
hsa-miR-1324	1	0	1	1	1	1	EIF4E3	eukaryotic translation initiation factor 4E family member 3
hsa-miR-1324	0	0	1	0	0	0	RPL23AP53	ribosomal protein L23a pseudogene 53
hsa-miR-1324	1	0	1	1	0	0	MAN1B1	mannosidase, alpha, class 1B, member 1
hsa-miR-1324	1	0	1	1	1	1	MKRN1	makorin ring finger protein 1
hsa-miR-1324	0	0	1	0	0	0	LOC100127955	uncharacterized LOC100127955
hsa-miR-1324	0	0	1	1	1	1	USP4	ubiquitin specific peptidase 4 (proto-oncogene)
hsa-miR-1324	1	0	1	1	1	1	CLTC	clathrin, heavy chain (Hc)
hsa-miR-1324	1	0	1	1	1	1	FMNL3	formin-like 3
hsa-miR-1324	1	0	1	0	1	1	N4BP3	NEDD4 binding protein 3
hsa-miR-1324	1	0	1	1	1	1	CTNNA2	catenin (cadherin-associated protein), alpha 2
hsa-miR-1324	1	0	1	1	0	0	SLC30A3	solute carrier family 30 (zinc transporter), member 3
hsa-miR-1324	1	0	1	1	0	0	PTPN5	protein tyrosine phosphatase, non-receptor type 5 (striatum-enriched)
hsa-miR-1324	0	0	1	0	0	0	LOC285812	uncharacterized LOC285812
hsa-miR-1324	0	0	1	1	0	0	GRINA	glutamate receptor, ionotropic, N-methyl D-aspartate-associated protein 1 (glutamate binding)
hsa-miR-1324	0	0	1	0	0	0	ERVFRD-2	endogenous retrovirus group FRD, member 2
hsa-miR-1324	1	0	1	1	1	1	PLA2G15	phospholipase A2, group XV
hsa-miR-1324	0	0	1	0	1	1	LOC401321	uncharacterized LOC401321
hsa-miR-1324	1	0	1	1	1	1	SLC12A6	solute carrier family 12 (potassium/chloride transporters), member 6
hsa-miR-1324	1	0	1	0	0	0	HK1	hexokinase 1
hsa-miR-1324	1	0	1	0	1	1	KDM2A	lysine (K)-specific demethylase 2A
hsa-miR-1324	1	0	1	1	0	0	SMCR7	Smith-Magenis syndrome chromosome region, candidate 7
hsa-miR-1324	0	0	1	0	0	0	LOC440993	uncharacterized LOC440993
hsa-miR-1324	1	0	1	1	1	1	KCTD12	potassium channel tetramerisation domain containing 12
hsa-miR-1324	1	0	1	1	1	1	BCAT1	branched chain amino-acid transaminase 1, cytosolic
hsa-miR-1324	1	0	1	0	1	1	KPNA6	karyopherin alpha 6 (importin alpha 7)
hsa-miR-1324	1	0	1	1	1	1	PHC2	polyhomeotic homolog 2 (Drosophila)
hsa-miR-1324	1	0	1	1	1	1	MRFAP1	Morf4 family associated protein 1
hsa-miR-1324	0	0	1	1	1	1	ADAM32	ADAM metallopeptidase domain 32
hsa-miR-1324	1	0	1	1	1	1	RBM24	RNA binding motif protein 24
hsa-miR-1324	0	0	1	1	1	1	ANXA6	annexin A6
hsa-miR-1324	0	0	1	0	0	0	LOC100133315	transient receptor potential cation channel, subfamily C, member 2-like
hsa-miR-1324	1	0	1	1	1	1	RNF111	ring finger protein 111
hsa-miR-1324	1	0	1	1	1	1	WTAP	Wilms tumor 1 associated protein
hsa-miR-1324	0	0	1	1	0	0	ZNF730	zinc finger protein 730
hsa-miR-1324	0	0	1	1	1	1	PDE2A	phosphodiesterase 2A, cGMP-stimulated
hsa-miR-1324	1	0	1	1	1	1	MAP2K4	mitogen-activated protein kinase kinase 4
hsa-miR-1324	0	0	1	1	1	1	PHF12	PHD finger protein 12
hsa-miR-1324	0	0	1	0	0	0	AGAP9	ArfGAP with GTPase domain, ankyrin repeat and PH domain 9
hsa-miR-1324	0	0	1	1	0	0	ZSCAN18	zinc finger and SCAN domain containing 18
hsa-miR-1324	1	0	1	1	1	1	SYS1	SYS1 Golgi-localized integral membrane protein homolog (S. cerevisiae)
hsa-miR-1324	0	0	1	1	1	1	AKTIP	AKT interacting protein
hsa-miR-1324	1	0	1	1	1	1	TAP2	transporter 2, ATP-binding cassette, sub-family B (MDR/TAP)
hsa-miR-1324	0	0	1	1	1	1	FANCC	Fanconi anemia, complementation group C
hsa-miR-1324	1	0	1	1	1	1	RPS6KA4	ribosomal protein S6 kinase, 90kDa, polypeptide 4
hsa-miR-1324	1	0	1	1	1	1	CYYR1	cysteine/tyrosine-rich 1
hsa-miR-1324	0	0	1	0	1	1	PEX5	peroxisomal biogenesis factor 5
hsa-miR-1324	1	0	1	1	1	1	PHTF2	putative homeodomain transcription factor 2
hsa-miR-1324	1	0	1	1	1	1	BIN2	bridging integrator 2
hsa-miR-1324	1	0	1	1	1	1	NCOA1	nuclear receptor coactivator 1
hsa-miR-1324	1	0	1	1	1	1	EDN1	endothelin 1
hsa-miR-1324	0	0	1	1	1	1	RABGAP1L	RAB GTPase activating protein 1-like
hsa-miR-1324	1	0	1	1	1	1	AHCYL1	adenosylhomocysteinase-like 1
hsa-miR-1324	0	0	1	0	1	1	NEK1	NIMA (never in mitosis gene a)-related kinase 1
hsa-miR-1324	1	0	1	1	1	1	ARF6	ADP-ribosylation factor 6
hsa-miR-1324	0	0	1	1	1	1	GFAP	glial fibrillary acidic protein
hsa-miR-1324	0	0	1	1	1	1	WDR52	WD repeat domain 52
hsa-miR-1324	0	0	1	0	0	0	KIAA0913	KIAA0913
hsa-miR-1324	1	0	1	1	1	1	PREX1	phosphatidylinositol-3,4,5-trisphosphate-dependent Rac exchange factor 1
hsa-miR-1324	1	0	1	1	1	1	SLC25A36	solute carrier family 25 (pyrimidine nucleotide carrier ), member 36
hsa-miR-1324	1	0	1	1	1	1	SECISBP2	SECIS binding protein 2
hsa-miR-1324	0	0	1	1	1	1	RHOT1	ras homolog family member T1
hsa-miR-1324	0	0	1	1	1	1	UBE3D	ubiquitin protein ligase E3D
hsa-miR-1324	1	0	1	1	1	1	KIAA1033	KIAA1033
hsa-miR-1324	1	0	1	0	1	1	CEP170	centrosomal protein 170kDa
hsa-miR-1324	0	0	1	1	0	0	DOPEY1	dopey family member 1
hsa-miR-1324	1	0	1	0	1	1	GRIN3A	glutamate receptor, ionotropic, N-methyl-D-aspartate 3A
hsa-miR-1324	0	0	1	0	0	0	RPL23AP82	ribosomal protein L23a pseudogene 82
hsa-miR-1324	1	0	1	1	1	1	PKNOX2	PBX/knotted 1 homeobox 2
hsa-miR-1324	1	0	1	0	1	1	FAM19A1	family with sequence similarity 19 (chemokine (C-C motif)-like), member A1
hsa-miR-1324	1	0	1	1	1	1	SLC30A8	solute carrier family 30 (zinc transporter), member 8
hsa-miR-1324	1	0	1	0	0	0	SYNPO	synaptopodin
hsa-miR-1324	1	0	1	1	1	1	DENND1B	DENN/MADD domain containing 1B
hsa-miR-1324	1	0	1	1	1	1	MIER1	mesoderm induction early response 1 homolog (Xenopus laevis)
hsa-miR-1324	0	0	1	1	0	0	THADA	thyroid adenoma associated
hsa-miR-1324	0	0	1	0	0	0	ZNF720	zinc finger protein 720
hsa-miR-1324	0	0	1	1	0	0	LETM2	leucine zipper-EF-hand containing transmembrane protein 2
hsa-miR-1324	0	0	1	1	1	1	EGFLAM	EGF-like, fibronectin type III and laminin G domains
hsa-miR-1324	1	0	1	1	1	1	NFX1	nuclear transcription factor, X-box binding 1
hsa-miR-1324	0	0	1	1	1	1	VIT	vitrin
hsa-miR-1324	1	0	1	1	0	0	PTAR1	protein prenyltransferase alpha subunit repeat containing 1
hsa-miR-1324	1	0	1	1	1	1	FBXO3	F-box protein 3
hsa-miR-1324	0	0	1	0	1	1	MYD88	myeloid differentiation primary response gene (88)
hsa-miR-1324	1	0	1	1	1	1	SBF2	SET binding factor 2
hsa-miR-1324	0	0	1	1	1	1	AMIGO2	adhesion molecule with Ig-like domain 2
hsa-miR-1324	1	0	1	1	1	1	FAM126A	family with sequence similarity 126, member A
hsa-miR-1324	1	0	1	1	1	1	SOX6	SRY (sex determining region Y)-box 6
hsa-miR-1324	0	0	1	1	1	1	CCDC14	coiled-coil domain containing 14
hsa-miR-1324	1	0	1	0	1	1	CLINT1	clathrin interactor 1
hsa-miR-1324	0	0	1	0	0	0	EPHA1-AS1	EPHA1 antisense RNA 1
hsa-miR-1324	1	0	1	0	1	1	EXOC5	exocyst complex component 5
hsa-miR-1324	0	0	1	1	1	1	PCDH20	protocadherin 20
hsa-miR-1324	0	0	1	1	1	1	CAND1	cullin-associated and neddylation-dissociated 1
hsa-miR-1324	0	0	1	1	1	1	TDRD9	tudor domain containing 9
hsa-miR-1324	1	0	1	1	1	1	PRPF38B	PRP38 pre-mRNA processing factor 38 (yeast) domain containing B
hsa-miR-1324	1	0	1	1	1	1	ANKRD49	ankyrin repeat domain 49
hsa-miR-1324	1	0	1	1	1	1	CADM2	cell adhesion molecule 2
hsa-miR-1324	0	0	1	0	1	1	SRR	serine racemase
hsa-miR-1324	0	0	1	1	1	1	C8orf34	chromosome 8 open reading frame 34
hsa-miR-1324	1	0	1	1	1	1	RICTOR	RPTOR independent companion of MTOR, complex 2
hsa-miR-1324	1	0	1	0	1	1	NR3C1	nuclear receptor subfamily 3, group C, member 1 (glucocorticoid receptor)
hsa-miR-1324	1	0	1	1	1	1	SET	SET nuclear oncogene
hsa-miR-1324	1	0	1	1	1	1	RNF38	ring finger protein 38
hsa-miR-1324	0	0	1	1	0	0	PPP3CC	protein phosphatase 3, catalytic subunit, gamma isozyme
hsa-miR-1324	1	0	1	1	1	1	IKZF2	IKAROS family zinc finger 2 (Helios)
hsa-miR-1324	0	0	1	0	1	1	STEAP2	STEAP family member 2, metalloreductase
hsa-miR-1324	1	0	1	1	1	1	GAL3ST3	galactose-3-O-sulfotransferase 3
hsa-miR-1324	0	0	1	1	1	1	KIF2C	kinesin family member 2C
hsa-miR-1324	0	0	1	1	1	1	KLHL7	kelch-like 7 (Drosophila)
hsa-miR-1324	1	0	1	1	1	1	DUSP16	dual specificity phosphatase 16
hsa-miR-1324	0	0	1	1	1	1	CD209	CD209 molecule
hsa-miR-1324	0	0	1	1	1	1	CRB1	crumbs homolog 1 (Drosophila)
hsa-miR-1324	0	0	1	1	1	1	GPRASP1	G protein-coupled receptor associated sorting protein 1
hsa-miR-1324	1	0	1	1	1	1	SORCS1	sortilin-related VPS10 domain containing receptor 1
hsa-miR-1324	1	0	1	1	1	1	USF2	upstream transcription factor 2, c-fos interacting
hsa-miR-1324	0	0	1	1	1	1	DNAJB14	DnaJ (Hsp40) homolog, subfamily B, member 14
hsa-miR-1324	0	0	1	1	0	0	ESPN	espin
hsa-miR-1324	0	0	1	1	0	0	DNAH1	dynein, axonemal, heavy chain 1
hsa-miR-1324	1	0	1	1	1	1	BCL11A	B-cell CLL/lymphoma 11A (zinc finger protein)
hsa-miR-1324	1	0	1	1	1	1	ILF3	interleukin enhancer binding factor 3, 90kDa
hsa-miR-1324	0	0	1	1	0	0	FANK1	fibronectin type III and ankyrin repeat domains 1
hsa-miR-1324	1	0	1	1	1	1	PBRM1	polybromo 1
hsa-miR-1324	1	0	1	1	1	1	RAI14	retinoic acid induced 14
hsa-miR-1324	1	0	1	1	1	1	TAB3	TGF-beta activated kinase 1/MAP3K7 binding protein 3
hsa-miR-1324	0	0	1	1	1	1	MFAP5	microfibrillar associated protein 5
hsa-miR-1324	1	0	1	1	1	1	CAMTA1	calmodulin binding transcription activator 1
hsa-miR-1324	0	0	1	1	1	1	GPR114	G protein-coupled receptor 114
hsa-miR-1324	1	0	1	1	1	1	NLGN4X	neuroligin 4, X-linked
hsa-miR-1324	1	0	1	1	1	1	P4HA2	prolyl 4-hydroxylase, alpha polypeptide II
hsa-miR-1324	1	0	1	1	1	1	OPRM1	opioid receptor, mu 1
hsa-miR-1324	1	0	1	0	1	1	ANKRD28	ankyrin repeat domain 28
hsa-miR-1324	1	0	1	1	1	1	GLRA2	glycine receptor, alpha 2
hsa-miR-1324	1	0	1	1	1	1	SP3	Sp3 transcription factor
hsa-miR-1324	1	0	1	1	1	1	ARHGAP20	Rho GTPase activating protein 20
hsa-miR-1324	1	0	1	1	1	1	MECP2	methyl CpG binding protein 2 (Rett syndrome)
hsa-miR-1324	0	0	1	1	0	0	PAOX	polyamine oxidase (exo-N4-amino)
hsa-miR-1324	1	0	1	0	1	1	LRAT	lecithin retinol acyltransferase (phosphatidylcholine--retinol O-acyltransferase)
hsa-miR-1324	1	0	1	1	1	1	LAMP2	lysosomal-associated membrane protein 2
hsa-miR-1324	0	0	1	1	1	1	NR1I3	nuclear receptor subfamily 1, group I, member 3
hsa-miR-1324	1	0	1	1	1	1	ITSN1	intersectin 1 (SH3 domain protein)
hsa-miR-1324	0	0	1	1	0	0	DHRS4	dehydrogenase/reductase (SDR family) member 4
hsa-miR-1324	1	0	1	1	1	1	BHLHE41	basic helix-loop-helix family, member e41
hsa-miR-1324	1	0	1	1	1	1	PLCH1	phospholipase C, eta 1
hsa-miR-1324	1	0	1	1	1	1	MAPT	microtubule-associated protein tau
hsa-miR-1324	1	0	1	1	1	1	QKI	QKI, KH domain containing, RNA binding
hsa-miR-1324	1	0	1	1	1	1	SAT1	spermidine/spermine N1-acetyltransferase 1
hsa-miR-1324	1	0	1	1	0	0	TRPC3	transient receptor potential cation channel, subfamily C, member 3
hsa-miR-1324	0	0	1	1	0	0	NBPF8	neuroblastoma breakpoint family, member 8
hsa-miR-1324	1	0	1	1	1	1	TBC1D22B	TBC1 domain family, member 22B
hsa-miR-1324	1	0	1	1	0	0	PLXNB3	plexin B3
hsa-miR-1324	0	0	1	1	1	1	IL23R	interleukin 23 receptor
hsa-miR-1324	0	0	1	1	1	1	IYD	iodotyrosine deiodinase
hsa-miR-1324	1	0	1	1	1	1	AMOT	angiomotin
hsa-miR-1324	1	0	1	1	1	1	RPRD1A	regulation of nuclear pre-mRNA domain containing 1A
hsa-miR-1324	0	0	1	0	0	0	GBAP1	glucosidase, beta, acid pseudogene 1
hsa-miR-1324	1	0	1	0	1	1	FAM46A	family with sequence similarity 46, member A
hsa-miR-1324	0	0	1	1	1	1	PAFAH1B2	platelet-activating factor acetylhydrolase 1b, catalytic subunit 2 (30kDa)
hsa-miR-1324	0	0	1	1	1	1	PTDSS1	phosphatidylserine synthase 1
hsa-miR-1324	0	0	1	1	1	1	B4GALT2	UDP-Gal:betaGlcNAc beta 1,4- galactosyltransferase, polypeptide 2
hsa-miR-1324	0	0	1	1	1	1	RLIM	ring finger protein, LIM domain interacting
hsa-miR-1324	1	0	1	0	0	0	VGLL4	vestigial like 4 (Drosophila)
hsa-miR-1324	1	0	1	1	1	1	RIMS3	regulating synaptic membrane exocytosis 3
hsa-miR-1324	0	0	1	1	1	1	BOD1	biorientation of chromosomes in cell division 1
hsa-miR-1324	1	0	1	0	1	1	DCAF10	DDB1 and CUL4 associated factor 10
hsa-miR-1324	0	0	1	1	0	0	SNRPB	small nuclear ribonucleoprotein polypeptides B and B1
hsa-miR-1324	1	0	1	1	0	0	DHDDS	dehydrodolichyl diphosphate synthase
hsa-miR-1324	1	0	1	1	1	1	SPRY2	sprouty homolog 2 (Drosophila)
hsa-miR-1324	1	0	1	1	1	1	POU2F2	POU class 2 homeobox 2
hsa-miR-1324	0	0	1	0	0	0	LOC93622	Morf4 family associated protein 1-like 1 pseudogene
hsa-miR-1324	1	0	1	1	1	1	KIAA1191	KIAA1191
hsa-miR-1324	1	0	1	1	1	1	U2SURP	U2 snRNP-associated SURP domain containing
hsa-miR-1324	1	0	1	1	0	0	SAP30BP	SAP30 binding protein
hsa-miR-1324	1	0	1	1	1	1	CALM1	calmodulin 1 (phosphorylase kinase, delta)
hsa-miR-1324	0	0	1	1	1	1	ZNF85	zinc finger protein 85
hsa-miR-1324	1	0	1	1	1	1	SHOX2	short stature homeobox 2
hsa-miR-1324	0	0	1	0	0	0	ATXN7L3B	ataxin 7-like 3B
hsa-miR-1324	1	0	1	1	0	0	SIGMAR1	sigma non-opioid intracellular receptor 1
hsa-miR-1324	0	0	1	1	1	1	ATXN2L	ataxin 2-like
hsa-miR-1324	1	0	1	1	1	1	GRIA2	glutamate receptor, ionotropic, AMPA 2
hsa-miR-1324	0	0	1	1	1	1	TAGLN	transgelin
hsa-miR-1324	1	0	1	1	1	1	TRIM2	tripartite motif containing 2
hsa-miR-1324	0	0	1	1	0	0	SETMAR	SET domain and mariner transposase fusion gene
hsa-miR-1324	0	0	1	1	1	1	GNL3L	guanine nucleotide binding protein-like 3 (nucleolar)-like
hsa-miR-1324	1	0	1	1	1	1	OTUD5	OTU domain containing 5
hsa-miR-1324	0	0	1	1	0	0	CAPNS1	calpain, small subunit 1
hsa-miR-1324	0	0	1	0	0	0	GRAMD1B	GRAM domain containing 1B
hsa-miR-1324	0	0	1	1	1	1	DEDD2	death effector domain containing 2
hsa-miR-1324	1	0	1	1	1	1	TMEM185A	transmembrane protein 185A
hsa-miR-1324	1	0	1	1	1	1	CAP1	CAP, adenylate cyclase-associated protein 1 (yeast)
hsa-miR-1324	1	0	1	1	1	1	ETF1	eukaryotic translation termination factor 1
hsa-miR-1324	1	0	1	1	1	1	ZDHHC3	zinc finger, DHHC-type containing 3
hsa-miR-1324	0	0	1	0	0	0	NUDT16P1	nudix (nucleoside diphosphate linked moiety X)-type motif 16 pseudogene 1
hsa-miR-1324	1	0	1	1	1	1	ZNF512	zinc finger protein 512
hsa-miR-1324	1	0	1	1	1	1	FAM199X	family with sequence similarity 199, X-linked
hsa-miR-1324	1	0	1	1	1	1	NRF1	nuclear respiratory factor 1
hsa-miR-1324	0	0	1	1	1	1	TRIM47	tripartite motif containing 47
hsa-miR-1324	0	0	1	1	0	0	ZBTB32	zinc finger and BTB domain containing 32
hsa-miR-1324	0	0	1	1	1	1	NDUFB5	NADH dehydrogenase (ubiquinone) 1 beta subcomplex, 5, 16kDa
hsa-miR-1324	1	0	1	1	1	1	WWC2	WW and C2 domain containing 2
hsa-miR-1324	1	0	1	1	1	1	ARHGEF9	Cdc42 guanine nucleotide exchange factor (GEF) 9
hsa-miR-1324	1	0	1	1	1	1	MID1IP1	MID1 interacting protein 1
hsa-miR-1324	0	0	1	1	1	1	HIBADH	3-hydroxyisobutyrate dehydrogenase
hsa-miR-1324	0	0	1	1	0	0	PTPMT1	protein tyrosine phosphatase, mitochondrial 1
hsa-miR-1324	0	0	1	1	1	1	TMEM40	transmembrane protein 40
hsa-miR-1324	0	0	1	0	1	1	ZNF718	zinc finger protein 718
hsa-miR-1324	1	0	1	0	1	1	BTF3L4	basic transcription factor 3-like 4
hsa-miR-1324	1	0	1	0	1	1	ARHGAP26	Rho GTPase activating protein 26
hsa-miR-1324	1	0	1	1	1	1	SCML4	sex comb on midleg-like 4 (Drosophila)
hsa-miR-1324	0	0	1	1	0	0	LYSMD2	LysM, putative peptidoglycan-binding, domain containing 2
hsa-miR-1324	1	0	1	1	1	1	SPRYD7	SPRY domain containing 7
hsa-miR-1324	0	0	1	1	1	1	PDE1C	phosphodiesterase 1C, calmodulin-dependent 70kDa
hsa-miR-1324	1	0	1	1	1	1	SPOCK2	sparc/osteonectin, cwcv and kazal-like domains proteoglycan (testican) 2
hsa-miR-1324	0	0	1	1	1	1	FAM221A	family with sequence similarity 221, member A
hsa-miR-1324	0	0	1	0	0	0	LOC494141	mitochondrial carrier triple repeat 1 pseudogene
hsa-miR-1324	1	0	1	1	1	1	CNTN4	contactin 4
hsa-miR-1324	1	0	1	1	1	1	FAM131A	family with sequence similarity 131, member A
hsa-miR-1324	1	0	1	1	1	1	SPG20	spastic paraplegia 20 (Troyer syndrome)
hsa-miR-1324	0	0	1	1	1	1	RHBDD1	rhomboid domain containing 1
hsa-miR-1324	0	0	1	1	1	1	ZNF589	zinc finger protein 589
hsa-miR-1324	0	0	1	0	0	0	LOC400891	chromosome 14 open reading frame 166B pseudogene
hsa-miR-1324	0	0	1	1	0	0	SYT3	synaptotagmin III
hsa-miR-1324	0	0	1	0	1	1	PAPOLG	poly(A) polymerase gamma
hsa-miR-1324	0	0	1	0	1	1	KIAA0895	KIAA0895
hsa-miR-1324	1	0	1	1	1	1	HTR2C	5-hydroxytryptamine (serotonin) receptor 2C, G protein-coupled
hsa-miR-1324	1	0	1	0	0	0	KCNU1	potassium channel, subfamily U, member 1
hsa-miR-1324	0	0	1	0	0	0	LOC100130950	uncharacterized LOC100130950
hsa-miR-1324	0	0	1	1	1	1	SEMA3D	sema domain, immunoglobulin domain (Ig), short basic domain, secreted, (semaphorin) 3D
hsa-miR-1324	0	0	1	1	1	1	TFAM	transcription factor A, mitochondrial
hsa-miR-1324	1	0	1	0	1	1	PSMF1	proteasome (prosome, macropain) inhibitor subunit 1 (PI31)
hsa-miR-1324	1	0	1	0	1	1	SV2B	synaptic vesicle glycoprotein 2B
hsa-miR-1324	1	0	1	0	1	1	GPR107	G protein-coupled receptor 107
hsa-miR-1324	0	0	1	1	1	1	TMEM117	transmembrane protein 117
hsa-miR-1324	0	0	1	1	1	1	PIP5K1B	phosphatidylinositol-4-phosphate 5-kinase, type I, beta
hsa-miR-1324	0	0	1	1	1	1	LPAR1	lysophosphatidic acid receptor 1
hsa-miR-1324	1	0	1	1	1	1	ELAVL2	ELAV (embryonic lethal, abnormal vision, Drosophila)-like 2 (Hu antigen B)
hsa-miR-1324	1	0	1	1	1	1	GABRA1	gamma-aminobutyric acid (GABA) A receptor, alpha 1
hsa-miR-1324	1	0	1	1	1	1	MUM1L1	melanoma associated antigen (mutated) 1-like 1
hsa-miR-1324	0	0	1	0	0	0	LOC729307	uncharacterized LOC729307
hsa-miR-1324	0	0	1	0	0	0	ATP8B5P	ATPase, class I, type 8B, member 5, pseudogene
hsa-miR-1324	1	0	1	1	1	1	PITPNB	phosphatidylinositol transfer protein, beta
hsa-miR-1324	0	0	1	0	0	0	CFL1P1	cofilin 1 (non-muscle) pseudogene 1
hsa-miR-1324	0	0	1	1	1	1	C5orf54	chromosome 5 open reading frame 54
hsa-miR-1324	0	0	1	0	1	1	TTC23L	tetratricopeptide repeat domain 23-like
hsa-miR-1324	1	0	1	1	1	1	SECISBP2L	SECIS binding protein 2-like
hsa-miR-1324	1	0	1	1	1	1	SIRPA	signal-regulatory protein alpha
hsa-miR-1324	0	0	1	1	0	0	IGFN1	immunoglobulin-like and fibronectin type III domain containing 1
hsa-miR-1324	0	0	1	1	1	1	ZNF337	zinc finger protein 337
hsa-miR-1324	0	0	1	0	0	0	FAM66C	family with sequence similarity 66, member C
hsa-miR-1324	0	0	1	0	1	1	DKFZP434I0714	uncharacterized protein DKFZP434I0714
hsa-miR-1324	0	0	1	1	1	1	EDA2R	ectodysplasin A2 receptor
hsa-miR-1324	1	0	1	0	1	1	DDX3Y	DEAD (Asp-Glu-Ala-Asp) box polypeptide 3, Y-linked
hsa-miR-1324	1	0	1	1	1	1	NKAIN2	Na+/K+ transporting ATPase interacting 2
hsa-miR-1324	1	0	1	1	1	1	ZZZ3	zinc finger, ZZ-type containing 3
hsa-miR-1324	1	0	1	1	0	0	CHST4	carbohydrate (N-acetylglucosamine 6-O) sulfotransferase 4
hsa-miR-1324	0	0	1	1	1	1	CLCNKA	chloride channel, voltage-sensitive Ka
hsa-miR-1324	1	0	1	1	1	1	RAP2C	RAP2C, member of RAS oncogene family
hsa-miR-1324	0	0	1	1	1	1	PAK6	p21 protein (Cdc42/Rac)-activated kinase 6
hsa-miR-1324	0	0	1	0	1	1	TMSB15B	thymosin beta 15B
hsa-miR-1324	1	0	1	1	1	1	ZEB2	zinc finger E-box binding homeobox 2
hsa-miR-1324	1	0	1	1	1	1	CTDSPL2	CTD (carboxy-terminal domain, RNA polymerase II, polypeptide A) small phosphatase like 2
hsa-miR-1324	0	0	1	0	0	0	HOXA-AS2	HOXA cluster antisense RNA 2
hsa-miR-1324	1	0	1	1	1	1	ZNF618	zinc finger protein 618
hsa-miR-1324	1	0	1	1	1	1	IMPACT	Impact homolog (mouse)
hsa-miR-1324	0	0	1	0	0	0	FAM201A	family with sequence similarity 201, member A
hsa-miR-1324	1	0	1	1	1	1	HECTD2	HECT domain containing E3 ubiquitin protein ligase 2
hsa-miR-1324	1	0	1	1	1	1	MEIS1	Meis homeobox 1
hsa-miR-1324	1	0	1	1	1	1	ACVR1	activin A receptor, type I
hsa-miR-1324	1	0	1	1	1	1	FAM135B	family with sequence similarity 135, member B
hsa-miR-1324	1	0	1	0	1	1	RAG1	recombination activating gene 1
hsa-miR-1324	1	0	1	0	0	0	RAVER1	ribonucleoprotein, PTB-binding 1
hsa-miR-1324	1	0	1	1	0	0	EBF4	early B-cell factor 4
hsa-miR-1324	1	0	1	1	1	1	CTBP2	C-terminal binding protein 2
hsa-miR-1324	1	0	1	1	1	1	UBXN2A	UBX domain protein 2A
hsa-miR-1324	1	0	1	1	1	1	DAAM1	dishevelled associated activator of morphogenesis 1
hsa-miR-1324	1	0	1	1	1	1	DPP10	dipeptidyl-peptidase 10 (non-functional)
hsa-miR-1324	1	0	1	0	1	1	CEP44	centrosomal protein 44kDa
hsa-miR-1324	0	0	1	1	0	0	H2AFZ	H2A histone family, member Z
hsa-miR-1324	0	0	1	1	0	0	CCDC152	coiled-coil domain containing 152
hsa-miR-1324	0	0	1	0	0	0	FLJ36000	uncharacterized FLJ36000
hsa-miR-1324	0	0	1	0	0	0	USP32P1	ubiquitin specific peptidase 32 pseudogene 1
hsa-miR-1324	1	0	1	0	1	1	LPHN3	latrophilin 3
hsa-miR-1324	0	0	1	1	1	1	SLTM	SAFB-like, transcription modulator
hsa-miR-1324	1	0	1	1	1	1	DACH2	dachshund homolog 2 (Drosophila)
hsa-miR-1324	1	0	1	0	1	1	PCSK2	proprotein convertase subtilisin/kexin type 2
hsa-miR-1324	0	0	1	0	0	0	A1BG-AS1	A1BG antisense RNA 1
hsa-miR-1324	0	0	1	1	1	1	SIAE	sialic acid acetylesterase
hsa-miR-1324	0	0	1	0	0	0	SLC7A11-AS1	SLC7A11 antisense RNA 1
hsa-miR-1324	1	0	1	1	1	1	TNFSF4	tumor necrosis factor (ligand) superfamily, member 4
hsa-miR-1324	1	0	1	1	1	1	DOC2A	double C2-like domains, alpha
hsa-miR-1324	1	0	1	1	1	1	ARID3B	AT rich interactive domain 3B (BRIGHT-like)
hsa-miR-1324	0	0	1	1	1	1	ZNF568	zinc finger protein 568
hsa-miR-1324	0	0	1	1	0	0	C1orf87	chromosome 1 open reading frame 87
hsa-miR-1324	1	0	1	0	1	1	USP6NL	USP6 N-terminal like
hsa-miR-1324	0	0	1	0	0	0	LOC157381	uncharacterized LOC157381
hsa-miR-1324	0	0	1	1	1	1	LDLRAD2	low density lipoprotein receptor class A domain containing 2
hsa-miR-1324	0	0	1	0	1	1	C12orf74	chromosome 12 open reading frame 74
hsa-miR-1324	0	0	1	0	0	0	SLC8A1-AS1	SLC8A1 antisense RNA 1
hsa-miR-1324	1	0	1	0	1	1	PSD3	pleckstrin and Sec7 domain containing 3
hsa-miR-1324	0	0	1	0	0	0	LOC283914	uncharacterized LOC283914
hsa-miR-1324	1	0	1	1	1	1	PCYT1B	phosphate cytidylyltransferase 1, choline, beta
hsa-miR-1324	1	0	1	1	1	1	SENP1	SUMO1/sentrin specific peptidase 1
hsa-miR-1324	1	0	1	1	1	1	SF3B1	splicing factor 3b, subunit 1, 155kDa
hsa-miR-1324	0	0	1	0	0	0	LOC339529	uncharacterized LOC339529
hsa-miR-1324	0	0	1	1	0	0	LILRA1	leukocyte immunoglobulin-like receptor, subfamily A (with TM domain), member 1
hsa-miR-1324	0	0	1	0	0	0	INHBA-AS1	INHBA antisense RNA 1
hsa-miR-1324	0	0	1	0	0	0	LOC348120	uncharacterized LOC348120
hsa-miR-1324	0	0	1	1	1	1	ANKDD1A	ankyrin repeat and death domain containing 1A
hsa-miR-1324	1	0	1	1	1	1	RTKN2	rhotekin 2
hsa-miR-1324	1	0	1	1	1	1	WSB1	WD repeat and SOCS box containing 1
hsa-miR-1324	1	0	1	1	1	1	RECK	reversion-inducing-cysteine-rich protein with kazal motifs
hsa-miR-1324	0	0	1	1	0	0	RPS9	ribosomal protein S9
hsa-miR-1324	1	0	1	0	1	1	SEMA4G	sema domain, immunoglobulin domain (Ig), transmembrane domain (TM) and short cytoplasmic domain, (semaphorin) 4G
hsa-miR-1324	0	0	1	1	1	1	LINC00086	long intergenic non-protein coding RNA 86
hsa-miR-1324	1	0	1	1	1	1	ZFP91	zinc finger protein 91 homolog (mouse)
hsa-miR-1324	1	0	1	1	1	1	CRCP	CGRP receptor component
hsa-miR-1324	0	0	1	1	0	0	LYZL6	lysozyme-like 6
hsa-miR-1324	0	0	1	1	1	1	ZNF254	zinc finger protein 254
hsa-miR-1324	0	0	1	1	1	1	MPP3	membrane protein, palmitoylated 3 (MAGUK p55 subfamily member 3)
hsa-miR-1324	1	0	1	1	1	1	ATP8B4	ATPase, class I, type 8B, member 4
hsa-miR-1324	0	0	1	1	0	0	WISP2	WNT1 inducible signaling pathway protein 2
hsa-miR-1324	0	0	1	1	0	0	IFT88	intraflagellar transport 88 homolog (Chlamydomonas)
hsa-miR-1324	1	0	1	1	1	1	PRRG1	proline rich Gla (G-carboxyglutamic acid) 1
hsa-miR-1324	1	0	1	1	0	0	ANKRD13B	ankyrin repeat domain 13B
hsa-miR-1324	1	0	1	1	1	1	SCOC	short coiled-coil protein
hsa-miR-1324	0	0	1	0	0	0	LOC387647	patched domain containing 3 pseudogene
hsa-miR-1324	1	0	1	1	1	1	ANXA4	annexin A4
hsa-miR-1324	0	0	1	1	0	0	PRSS55	protease, serine, 55
hsa-miR-1324	1	0	1	1	1	1	ADCY6	adenylate cyclase 6
hsa-miR-1324	1	0	1	1	1	1	ASPH	aspartate beta-hydroxylase
hsa-miR-1324	0	0	1	1	0	0	TMEM183A	transmembrane protein 183A
hsa-miR-1324	1	0	1	0	1	1	MAGIX	MAGI family member, X-linked
hsa-miR-1324	0	0	1	0	0	0	ZNF66P	zinc finger protein 66, pseudogene
hsa-miR-1324	1	0	1	0	0	0	TNRC18	trinucleotide repeat containing 18
hsa-miR-1324	1	0	1	1	1	1	PDCD6IP	programmed cell death 6 interacting protein
hsa-miR-1324	1	0	1	1	1	1	SLC26A7	solute carrier family 26, member 7
hsa-miR-1324	1	0	1	1	0	0	TMEM198	transmembrane protein 198
hsa-miR-1324	0	0	1	0	0	0	CHADL	chondroadherin-like
hsa-miR-1324	0	0	1	1	0	0	CYP4F30P	cytochrome P450, family 4, subfamily F, polypeptide 30, pseudogene
hsa-miR-1324	1	0	1	1	1	1	SCAF8	SR-related CTD-associated factor 8
hsa-miR-1324	0	0	1	1	0	0	TMEM107	transmembrane protein 107
hsa-miR-1324	1	0	1	0	1	1	HMGB3	high mobility group box 3
hsa-miR-1324	1	0	1	1	1	1	FARP1	FERM, RhoGEF (ARHGEF) and pleckstrin domain protein 1 (chondrocyte-derived)
hsa-miR-1324	0	0	1	0	0	0	SDHAP2	succinate dehydrogenase complex, subunit A, flavoprotein pseudogene 2
hsa-miR-1324	1	0	1	1	1	1	WBP1L	WW domain binding protein 1-like
hsa-miR-1324	0	0	1	1	1	1	VPS16	vacuolar protein sorting 16 homolog (S. cerevisiae)
hsa-miR-1324	1	0	1	1	1	1	OPCML	opioid binding protein/cell adhesion molecule-like
hsa-miR-1324	1	0	1	1	1	1	WNT5A	wingless-type MMTV integration site family, member 5A
hsa-miR-1324	0	0	1	0	0	0	C17orf89	chromosome 17 open reading frame 89
hsa-miR-1324	0	0	1	1	1	1	FCF1	FCF1 small subunit (SSU) processome component homolog (S. cerevisiae)
hsa-miR-1324	0	0	1	0	0	0	LINC00537	long intergenic non-protein coding RNA 537
hsa-miR-1324	1	0	1	1	1	1	APBA2	amyloid beta (A4) precursor protein-binding, family A, member 2
hsa-miR-1324	0	0	1	0	1	1	CCL4L2	chemokine (C-C motif) ligand 4-like 2
hsa-miR-1324	0	0	1	1	1	1	CCL4L1	chemokine (C-C motif) ligand 4-like 1
hsa-miR-1324	0	0	1	1	1	1	COBL	cordon-bleu homolog (mouse)
hsa-miR-1324	1	0	1	1	1	1	ACVR2B	activin A receptor, type IIB
hsa-miR-1324	1	0	1	1	0	0	PLD3	phospholipase D family, member 3
hsa-miR-1324	1	0	1	0	1	1	LRRTM4	leucine rich repeat transmembrane neuronal 4
hsa-miR-1324	0	0	1	1	0	0	PPP1R14D	protein phosphatase 1, regulatory (inhibitor) subunit 14D
hsa-miR-1324	1	0	1	1	1	1	SYNJ1	synaptojanin 1
hsa-miR-1324	1	0	1	0	1	1	ARPP19	cAMP-regulated phosphoprotein, 19kDa
hsa-miR-1324	0	0	1	1	0	0	MTMR11	myotubularin related protein 11
hsa-miR-1324	0	0	1	1	1	1	ZNF365	zinc finger protein 365
hsa-miR-1324	1	0	1	0	1	1	MYBL1	v-myb myeloblastosis viral oncogene homolog (avian)-like 1
hsa-miR-1324	1	0	1	0	1	1	CPEB2	cytoplasmic polyadenylation element binding protein 2
hsa-miR-1324	0	0	1	0	0	0	LOC441493	uncharacterized LOC441493
hsa-miR-1324	1	0	1	1	1	1	SLC35G1	solute carrier family 35, member G1
hsa-miR-1324	0	0	1	1	0	0	ZNF276	zinc finger protein 276
hsa-miR-1324	1	0	1	1	1	1	PTPRD	protein tyrosine phosphatase, receptor type, D
hsa-miR-1324	1	0	1	1	1	1	USP34	ubiquitin specific peptidase 34
hsa-miR-1324	0	0	1	1	0	0	C9orf153	chromosome 9 open reading frame 153
hsa-miR-1324	1	0	1	1	1	1	CERS6	ceramide synthase 6
hsa-miR-1324	1	0	1	1	1	1	SP4	Sp4 transcription factor
hsa-miR-1324	1	0	1	0	1	1	KIF5C	kinesin family member 5C
hsa-miR-1324	1	0	1	0	1	1	MAP3K9	mitogen-activated protein kinase kinase kinase 9
hsa-miR-1324	1	0	1	1	1	1	SLK	STE20-like kinase
hsa-miR-1324	1	0	1	1	1	1	NR3C2	nuclear receptor subfamily 3, group C, member 2
hsa-miR-1324	0	0	1	1	0	0	PRAMEF10	PRAME family member 10
hsa-miR-1324	0	0	1	1	0	0	RNF123	ring finger protein 123
hsa-miR-1324	1	0	1	1	1	1	SHANK2	SH3 and multiple ankyrin repeat domains 2
hsa-miR-1324	1	0	1	1	1	1	ST18	suppression of tumorigenicity 18 (breast carcinoma) (zinc finger protein)
hsa-miR-1324	1	0	1	1	1	1	OTUD4	OTU domain containing 4
hsa-miR-1324	1	0	1	1	1	1	OSBP2	oxysterol binding protein 2
hsa-miR-1324	0	0	1	1	0	0	WDR90	WD repeat domain 90
hsa-miR-1324	1	0	1	1	1	1	ANK2	ankyrin 2, neuronal
hsa-miR-1324	1	0	1	1	1	1	MEGF11	multiple EGF-like-domains 11
hsa-miR-1324	1	0	1	1	1	1	ZMYM4	zinc finger, MYM-type 4
hsa-miR-1324	0	0	1	0	1	1	C20orf202	chromosome 20 open reading frame 202
hsa-miR-1324	1	0	1	0	0	0	FAM189A1	family with sequence similarity 189, member A1
hsa-miR-1324	0	0	1	1	0	0	USP19	ubiquitin specific peptidase 19
hsa-miR-1324	0	0	1	1	1	1	HSF2	heat shock transcription factor 2
hsa-miR-1324	0	0	1	1	0	0	TTC21A	tetratricopeptide repeat domain 21A
hsa-miR-1324	0	0	1	0	0	0	FAM225B	family with sequence similarity 225, member B (non-protein coding)
hsa-miR-1324	1	0	1	1	1	1	C18orf34	chromosome 18 open reading frame 34
hsa-miR-1324	0	0	1	1	0	0	TCHH	trichohyalin
hsa-miR-1324	1	0	1	1	1	1	TMEM218	transmembrane protein 218
hsa-miR-1324	1	0	1	1	1	1	FNDC3A	fibronectin type III domain containing 3A
hsa-miR-1324	0	0	1	1	1	1	TCL6	T-cell leukemia/lymphoma 6 (non-protein coding)
hsa-miR-1324	0	0	1	0	0	0	TMED8	transmembrane emp24 protein transport domain containing 8
hsa-miR-1324	1	0	1	1	0	0	RGS6	regulator of G-protein signaling 6
hsa-miR-1324	1	0	1	1	1	1	SASH1	SAM and SH3 domain containing 1
hsa-miR-1324	1	0	1	0	1	1	SEMA4B	sema domain, immunoglobulin domain (Ig), transmembrane domain (TM) and short cytoplasmic domain, (semaphorin) 4B
hsa-miR-1324	1	0	1	1	1	1	ATP2B4	ATPase, Ca++ transporting, plasma membrane 4
hsa-miR-1324	1	0	1	1	1	1	RAB7A	RAB7A, member RAS oncogene family
hsa-miR-1324	1	0	1	0	1	1	NFIX	nuclear factor I/X (CCAAT-binding transcription factor)
hsa-miR-1324	1	0	1	1	1	1	MIER3	mesoderm induction early response 1, family member 3
hsa-miR-1324	0	0	1	1	1	1	KBTBD12	kelch repeat and BTB (POZ) domain containing 12
hsa-miR-1324	0	0	1	1	0	0	CCDC171	coiled-coil domain containing 171
hsa-miR-1324	1	0	1	1	1	1	ETS1	v-ets erythroblastosis virus E26 oncogene homolog 1 (avian)
hsa-miR-1324	1	0	1	1	1	1	SLC35F1	solute carrier family 35, member F1
hsa-miR-1324	1	0	1	1	1	1	SPPL3	signal peptide peptidase like 3
hsa-miR-1324	0	0	1	0	0	0	MGC23284	uncharacterized LOC197187
hsa-miR-1324	0	0	1	1	1	1	PSMA2	proteasome (prosome, macropain) subunit, alpha type, 2
hsa-miR-1324	0	0	1	1	1	1	MAP2K6	mitogen-activated protein kinase kinase 6
hsa-miR-1324	0	0	1	1	1	1	GTF3C2	general transcription factor IIIC, polypeptide 2, beta 110kDa
hsa-miR-1324	0	0	1	0	0	0	TRAF3IP2-AS1	TRAF3IP2 antisense RNA 1
hsa-miR-1324	1	0	1	1	1	1	MASP1	mannan-binding lectin serine peptidase 1 (C4/C2 activating component of Ra-reactive factor)
hsa-miR-1324	0	0	1	1	0	0	RPS24	ribosomal protein S24
hsa-miR-1324	0	0	1	1	1	1	CC2D2A	coiled-coil and C2 domain containing 2A
hsa-miR-1324	0	0	1	1	1	1	ADH1B	alcohol dehydrogenase 1B (class I), beta polypeptide
hsa-miR-1324	0	0	1	1	1	1	MLIP	muscular LMNA-interacting protein
hsa-miR-1324	1	0	1	1	1	1	USP6	ubiquitin specific peptidase 6 (Tre-2 oncogene)
hsa-miR-1324	1	0	1	0	1	1	VPS36	vacuolar protein sorting 36 homolog (S. cerevisiae)
hsa-miR-1324	1	0	1	1	1	1	TSC22D3	TSC22 domain family, member 3
hsa-miR-1324	0	0	1	1	0	0	LRR1	leucine rich repeat protein 1
hsa-miR-1324	1	0	1	1	1	1	GDI2	GDP dissociation inhibitor 2
hsa-miR-1324	1	0	1	1	1	1	NEDD9	neural precursor cell expressed, developmentally down-regulated 9
hsa-miR-1324	1	0	1	1	1	1	HDAC1	histone deacetylase 1
hsa-miR-1324	0	0	1	1	1	1	EXT2	exostosin 2
hsa-miR-1324	1	0	1	1	1	1	KLHL6	kelch-like 6 (Drosophila)
hsa-miR-1324	1	0	1	1	1	1	NFIB	nuclear factor I/B
hsa-miR-1324	0	0	1	1	1	1	DAZL	deleted in azoospermia-like
hsa-miR-1324	1	0	1	1	1	1	PGAP1	post-GPI attachment to proteins 1
hsa-miR-1324	0	0	1	0	0	0	ZNRD1-AS1	ZNRD1 antisense RNA 1
hsa-miR-1324	1	0	1	1	1	1	EOGT	EGF domain-specific O-linked N-acetylglucosamine (GlcNAc) transferase
hsa-miR-1324	0	0	1	1	1	1	KIAA1328	KIAA1328
hsa-miR-1324	1	0	1	0	1	1	TBL1XR1	transducin (beta)-like 1 X-linked receptor 1
hsa-miR-1324	0	0	1	0	1	1	STT3A	STT3, subunit of the oligosaccharyltransferase complex, homolog A (S. cerevisiae)
hsa-miR-1324	1	0	1	1	1	1	AP2M1	adaptor-related protein complex 2, mu 1 subunit
hsa-miR-1324	0	0	1	1	1	1	HPGD	hydroxyprostaglandin dehydrogenase 15-(NAD)
hsa-miR-1324	0	0	1	1	0	0	PRELID1	PRELI domain containing 1
hsa-miR-1324	1	0	1	0	1	1	RNF144A	ring finger protein 144A
hsa-miR-1324	1	0	1	0	1	1	STX6	syntaxin 6
hsa-miR-1324	1	0	1	0	0	0	IGLON5	IgLON family member 5
hsa-miR-1324	0	0	1	1	0	0	SLC39A7	solute carrier family 39 (zinc transporter), member 7
hsa-miR-1324	0	0	1	1	1	1	DNM1	dynamin 1
hsa-miR-1324	0	0	1	1	0	0	CDC37	cell division cycle 37 homolog (S. cerevisiae)
hsa-miR-1324	0	0	1	1	0	0	SARS	seryl-tRNA synthetase
hsa-miR-1324	0	0	1	0	0	0	RPS16P10	ribosomal protein S16 pseudogene 10
hsa-miR-1324	0	0	1	0	0	0	LOC400768	uncharacterized LOC400768
hsa-miR-1324	0	0	1	1	0	0	URM1	ubiquitin related modifier 1
hsa-miR-1324	0	0	1	1	0	0	F2	coagulation factor II (thrombin)
hsa-miR-1324	0	0	1	0	0	0	COX4I2	cytochrome c oxidase subunit IV isoform 2 (lung)
hsa-miR-1324	1	0	1	1	1	1	CLDN11	claudin 11
hsa-miR-1324	0	0	1	1	1	1	ATP1B3	ATPase, Na+/K+ transporting, beta 3 polypeptide
hsa-miR-1324	1	0	1	1	1	1	C8orf58	chromosome 8 open reading frame 58
hsa-miR-1324	1	0	1	1	1	1	SLC35D2	solute carrier family 35, member D2
hsa-miR-1324	0	0	1	1	1	1	APBB1	amyloid beta (A4) precursor protein-binding, family B, member 1 (Fe65)
hsa-miR-1324	0	0	1	1	0	0	ITGB3BP	integrin beta 3 binding protein (beta3-endonexin)
hsa-miR-1324	0	0	1	1	0	0	SRM	spermidine synthase
hsa-miR-1324	1	0	1	1	1	1	DOLPP1	dolichyl pyrophosphate phosphatase 1
hsa-miR-1324	1	0	1	1	1	1	ANXA2	annexin A2
hsa-miR-1324	1	0	1	0	1	1	BNIP3L	BCL2/adenovirus E1B 19kDa interacting protein 3-like
hsa-miR-1324	1	0	1	1	0	0	ELOVL1	ELOVL fatty acid elongase 1
hsa-miR-1324	0	0	1	1	1	1	FAT1	FAT tumor suppressor homolog 1 (Drosophila)
hsa-miR-1324	1	0	1	1	1	1	E2F5	E2F transcription factor 5, p130-binding
hsa-miR-1324	0	0	1	1	0	0	SPAG8	sperm associated antigen 8
hsa-miR-1324	1	0	1	1	1	1	CCNE1	cyclin E1
hsa-miR-1324	1	0	1	1	1	1	TMED5	transmembrane emp24 protein transport domain containing 5
hsa-miR-1324	1	0	1	1	1	1	MDK	midkine (neurite growth-promoting factor 2)
hsa-miR-1324	0	0	1	0	0	0	TRIQK	triple QxxK/R motif containing
hsa-miR-1324	0	0	1	1	1	1	IFNGR2	interferon gamma receptor 2 (interferon gamma transducer 1)
hsa-miR-1324	0	0	1	1	0	0	MRPS2	mitochondrial ribosomal protein S2
hsa-miR-1324	0	0	1	1	0	0	FAM64A	family with sequence similarity 64, member A
hsa-miR-1324	1	0	1	1	1	1	TFDP1	transcription factor Dp-1
hsa-miR-1324	0	0	1	1	0	0	KIAA0100	KIAA0100
hsa-miR-1324	0	0	1	1	1	1	TRIM68	tripartite motif containing 68
hsa-miR-1324	0	0	1	1	0	0	CXorf40A	chromosome X open reading frame 40A
hsa-miR-1324	1	0	1	1	1	1	LYPLA2	lysophospholipase II
hsa-miR-1324	0	0	1	1	1	1	XBP1	X-box binding protein 1
hsa-miR-1324	1	0	1	0	1	1	KIAA0494	KIAA0494
hsa-miR-1324	1	0	1	0	1	1	MGRN1	mahogunin ring finger 1, E3 ubiquitin protein ligase
hsa-miR-1324	1	0	1	1	1	1	BAMBI	BMP and activin membrane-bound inhibitor homolog (Xenopus laevis)
hsa-miR-1324	0	0	1	1	1	1	EIF3J	eukaryotic translation initiation factor 3, subunit J
hsa-miR-1324	1	0	1	0	1	1	PLK3	polo-like kinase 3
hsa-miR-1324	1	0	1	1	1	1	SSBP3	single stranded DNA binding protein 3
hsa-miR-1324	1	0	1	1	1	1	DKK3	dickkopf 3 homolog (Xenopus laevis)
hsa-miR-1324	0	0	1	0	0	0	MEG3	maternally expressed 3 (non-protein coding)
hsa-miR-1324	0	0	1	1	1	1	NFATC4	nuclear factor of activated T-cells, cytoplasmic, calcineurin-dependent 4
hsa-miR-1324	1	0	1	1	1	1	PEX2	peroxisomal biogenesis factor 2
hsa-miR-1324	1	0	1	1	1	1	CUX1	cut-like homeobox 1
hsa-miR-1324	0	0	1	1	1	1	ZDHHC16	zinc finger, DHHC-type containing 16
hsa-miR-1324	0	0	1	0	1	1	SRSF5	serine/arginine-rich splicing factor 5
hsa-miR-1324	1	0	1	1	1	1	CAMK2A	calcium/calmodulin-dependent protein kinase II alpha
hsa-miR-1324	0	0	1	0	0	0	EPB41L4A-AS1	EPB41L4A antisense RNA 1
hsa-miR-1324	1	0	1	1	1	1	HN1	hematological and neurological expressed 1
hsa-miR-1324	0	0	1	0	1	1	VSTM2A	V-set and transmembrane domain containing 2A
hsa-miR-1324	1	0	1	1	1	1	FUBP3	far upstream element (FUSE) binding protein 3
hsa-miR-1324	0	0	1	0	1	1	SUMO2	SMT3 suppressor of mif two 3 homolog 2 (S. cerevisiae)
hsa-miR-1324	1	0	1	1	1	1	ARL4A	ADP-ribosylation factor-like 4A
hsa-miR-1324	0	0	1	1	1	1	TCTN3	tectonic family member 3
hsa-miR-1324	1	0	1	1	1	1	BAALC	brain and acute leukemia, cytoplasmic
hsa-miR-1324	0	0	1	1	0	0	MYCBPAP	MYCBP associated protein
hsa-miR-1324	1	0	1	1	1	1	PFN2	profilin 2
hsa-miR-1324	1	0	1	1	1	1	EIF1	eukaryotic translation initiation factor 1
hsa-miR-1324	1	0	1	1	1	1	NFYB	nuclear transcription factor Y, beta
hsa-miR-1324	1	0	1	1	1	1	PSAP	prosaposin
hsa-miR-1324	0	0	1	1	0	0	ZNF511	zinc finger protein 511
hsa-miR-1324	1	0	1	1	1	1	ARMC8	armadillo repeat containing 8
hsa-miR-1324	0	0	1	1	1	1	STRAP	serine/threonine kinase receptor associated protein
hsa-miR-1324	0	0	1	1	0	0	OXA1L	oxidase (cytochrome c) assembly 1-like
hsa-miR-1324	1	0	1	1	1	1	RBFOX2	RNA binding protein, fox-1 homolog (C. elegans) 2
hsa-miR-1324	0	0	1	0	0	0	RNF115	ring finger protein 115
hsa-miR-1324	0	0	1	1	1	1	FBLN7	fibulin 7
hsa-miR-1324	1	0	1	1	0	0	CCM2	cerebral cavernous malformation 2
hsa-miR-1324	0	0	1	1	1	1	PLAC8	placenta-specific 8
hsa-miR-1324	0	0	1	0	0	0	NUDT18	nudix (nucleoside diphosphate linked moiety X)-type motif 18
hsa-miR-1324	0	0	1	1	1	1	ZNF346	zinc finger protein 346
hsa-miR-1324	0	0	1	1	1	1	INPP5K	inositol polyphosphate-5-phosphatase K
hsa-miR-1324	0	0	1	1	0	0	TESK1	testis-specific kinase 1
hsa-miR-1324	1	0	1	1	1	1	TIPRL	TIP41, TOR signaling pathway regulator-like (S. cerevisiae)
hsa-miR-1324	1	0	1	1	1	1	MPP1	membrane protein, palmitoylated 1, 55kDa
hsa-miR-1324	0	0	1	1	0	0	KAT8	K(lysine) acetyltransferase 8
hsa-miR-1324	0	0	1	1	1	1	ZFAND1	zinc finger, AN1-type domain 1
hsa-miR-1324	1	0	1	0	1	1	DNMT3A	DNA (cytosine-5-)-methyltransferase 3 alpha
hsa-miR-1324	1	0	1	1	0	0	HDDC3	HD domain containing 3
hsa-miR-1324	1	0	1	1	1	1	SERF2	small EDRK-rich factor 2
hsa-miR-1324	1	0	1	1	1	1	RND3	Rho family GTPase 3
hsa-miR-1324	0	0	1	0	0	0	FAM47E	family with sequence similarity 47, member E
hsa-miR-1324	1	0	1	1	1	1	STAG2	stromal antigen 2
hsa-miR-1324	1	0	1	0	1	1	KIAA0664	KIAA0664
hsa-miR-1324	1	0	1	1	1	1	DNAJC16	DnaJ (Hsp40) homolog, subfamily C, member 16
hsa-miR-1324	0	0	1	1	1	1	ATG5	autophagy related 5
hsa-miR-1324	1	0	1	1	1	1	HECW2	HECT, C2 and WW domain containing E3 ubiquitin protein ligase 2
hsa-miR-1324	1	0	1	0	1	1	PTP4A1	protein tyrosine phosphatase type IVA, member 1
hsa-miR-1324	1	0	1	0	1	1	SLC7A6	solute carrier family 7 (amino acid transporter light chain, y+L system), member 6
hsa-miR-1324	0	0	1	0	1	1	USP10	ubiquitin specific peptidase 10
hsa-miR-1324	0	0	1	1	1	1	SLC25A26	solute carrier family 25 (S-adenosylmethionine carrier), member 26
hsa-miR-1324	0	0	1	1	0	0	TENC1	tensin like C1 domain containing phosphatase (tensin 2)
hsa-miR-1324	1	0	1	1	1	1	PRKG1	protein kinase, cGMP-dependent, type I
hsa-miR-1324	0	0	1	0	0	0	61E3.4	nuclear pore complex interacting protein-like
hsa-miR-1324	0	0	1	1	0	0	SPINK5	serine peptidase inhibitor, Kazal type 5
hsa-miR-1324	0	0	1	1	1	1	PTGS1	prostaglandin-endoperoxide synthase 1 (prostaglandin G/H synthase and cyclooxygenase)
hsa-miR-1324	0	0	1	1	0	0	SPATA20	spermatogenesis associated 20
hsa-miR-1324	0	0	1	1	0	0	GPR111	G protein-coupled receptor 111
hsa-miR-1324	0	0	1	0	0	0	CDKN2B-AS1	CDKN2B antisense RNA 1
hsa-miR-1324	1	0	1	0	1	1	CACNA1G	calcium channel, voltage-dependent, T type, alpha 1G subunit
hsa-miR-1324	0	0	1	1	1	1	MARVELD2	MARVEL domain containing 2
hsa-miR-1324	1	0	1	0	1	1	DCBLD2	discoidin, CUB and LCCL domain containing 2
hsa-miR-1324	1	0	1	1	1	1	LGR4	leucine-rich repeat containing G protein-coupled receptor 4
hsa-miR-1324	1	0	1	0	1	1	EPDR1	ependymin related protein 1 (zebrafish)
hsa-miR-1324	1	0	1	1	1	1	SLC4A8	solute carrier family 4, sodium bicarbonate cotransporter, member 8
hsa-miR-1324	0	0	1	1	1	1	MORC4	MORC family CW-type zinc finger 4
hsa-miR-1324	1	0	1	1	1	1	MLL	myeloid/lymphoid or mixed-lineage leukemia (trithorax homolog, Drosophila)
hsa-miR-1324	0	0	1	1	1	1	ADPRH	ADP-ribosylarginine hydrolase
hsa-miR-1324	1	0	1	1	1	1	ATP2B2	ATPase, Ca++ transporting, plasma membrane 2
hsa-miR-1324	1	0	1	0	1	1	BCL2	B-cell CLL/lymphoma 2
hsa-miR-1324	1	0	1	1	1	1	ELK1	ELK1, member of ETS oncogene family
hsa-miR-1324	0	0	1	0	0	0	PVT1	Pvt1 oncogene (non-protein coding)
hsa-miR-1324	1	0	1	0	1	1	ACVR2A	activin A receptor, type IIA
hsa-miR-1324	1	0	1	1	1	1	CYP19A1	cytochrome P450, family 19, subfamily A, polypeptide 1
hsa-miR-1324	1	0	1	0	1	1	SLC26A2	solute carrier family 26 (sulfate transporter), member 2
hsa-miR-1324	0	0	1	1	1	1	EDN3	endothelin 3
hsa-miR-1324	1	0	1	1	1	1	ESR1	estrogen receptor 1
hsa-miR-1324	0	0	1	0	1	1	MS4A2	membrane-spanning 4-domains, subfamily A, member 2
hsa-miR-1324	1	0	1	1	1	1	FUCA1	fucosidase, alpha-L- 1, tissue
hsa-miR-1324	1	0	1	1	1	1	FUT1	fucosyltransferase 1 (galactoside 2-alpha-L-fucosyltransferase, H blood group)
hsa-miR-1324	0	0	1	1	0	0	GBA	glucosidase, beta, acid
hsa-miR-1324	1	0	1	0	1	1	GCH1	GTP cyclohydrolase 1
hsa-miR-1324	1	0	1	1	1	1	GK	glycerol kinase
hsa-miR-1324	1	0	1	1	1	1	TBX5	T-box 5
hsa-miR-1324	1	0	1	0	1	1	ITGB3	integrin, beta 3 (platelet glycoprotein IIIa, antigen CD61)
hsa-miR-1324	1	0	1	0	1	1	KIT	v-kit Hardy-Zuckerman 4 feline sarcoma viral oncogene homolog
hsa-miR-1324	1	0	1	1	1	1	LEP	leptin
hsa-miR-1324	1	0	1	0	1	1	SGCB	sarcoglycan, beta (43kDa dystrophin-associated glycoprotein)
hsa-miR-1324	0	0	1	1	1	1	MAOA	monoamine oxidase A
hsa-miR-1324	0	0	1	1	1	1	MTR	5-methyltetrahydrofolate-homocysteine methyltransferase
hsa-miR-1324	1	0	1	1	1	1	PTCH1	patched 1
hsa-miR-1324	1	0	1	1	1	1	NPC1	Niemann-Pick disease, type C1
hsa-miR-1324	1	0	1	1	1	1	OCRL	oculocerebrorenal syndrome of Lowe
hsa-miR-1324	1	0	1	1	0	0	PAX2	paired box 2
hsa-miR-1324	1	0	1	1	1	1	PMP22	peripheral myelin protein 22
hsa-miR-1324	1	0	1	1	1	1	ATXN1	ataxin 1
hsa-miR-1324	1	0	1	1	1	1	TIMP3	TIMP metallopeptidase inhibitor 3
hsa-miR-1324	0	0	1	1	1	1	XDH	xanthine dehydrogenase
hsa-miR-1324	1	0	1	1	1	1	CHM	choroideremia (Rab escort protein 1)
hsa-miR-1324	1	0	1	1	1	1	HLCS	holocarboxylase synthetase (biotin-(proprionyl-CoA-carboxylase (ATP-hydrolysing)) ligase)
hsa-miR-1324	0	0	1	1	1	1	LAMA2	laminin, alpha 2
hsa-miR-1324	1	0	1	0	1	1	PAFAH1B1	platelet-activating factor acetylhydrolase 1b, regulatory subunit 1 (45kDa)
hsa-miR-1324	1	0	1	0	1	1	PCSK1	proprotein convertase subtilisin/kexin type 1
hsa-miR-1324	1	0	1	1	1	1	SLC26A4	solute carrier family 26, member 4
hsa-miR-1324	0	0	1	1	1	1	PLEC	plectin
hsa-miR-1324	1	0	1	1	1	1	HNF1B	HNF1 homeobox B
hsa-miR-1324	0	0	1	1	0	0	APOA4	apolipoprotein A-IV
hsa-miR-1324	0	0	1	1	1	1	FCGR1A	Fc fragment of IgG, high affinity Ia, receptor (CD64)
hsa-miR-1324	0	0	1	1	1	1	LTA	lymphotoxin alpha (TNF superfamily, member 1)
hsa-miR-1324	1	0	1	1	1	1	CD44	CD44 molecule (Indian blood group)
hsa-miR-1324	0	0	1	1	1	1	IGF2	insulin-like growth factor 2 (somatomedin A)
hsa-miR-1324	0	0	1	1	1	1	GSR	glutathione reductase
hsa-miR-1324	1	0	1	1	1	1	CACNB4	calcium channel, voltage-dependent, beta 4 subunit
hsa-miR-1324	1	0	1	1	1	1	GAD1	glutamate decarboxylase 1 (brain, 67kDa)
hsa-miR-1324	1	0	1	1	0	0	GRIN2A	glutamate receptor, ionotropic, N-methyl D-aspartate 2A
hsa-miR-1324	1	0	1	1	1	1	IGF1R	insulin-like growth factor 1 receptor
hsa-miR-1324	1	0	1	0	1	1	KCNJ2	potassium inwardly-rectifying channel, subfamily J, member 2
hsa-miR-1324	0	0	1	1	0	0	MGP	matrix Gla protein
hsa-miR-1324	1	0	1	1	1	1	PPP3R1	protein phosphatase 3, regulatory subunit B, alpha
hsa-miR-1324	1	0	1	0	1	1	SMAD5	SMAD family member 5
hsa-miR-1324	0	0	1	1	0	0	SNCB	synuclein, beta
hsa-miR-1324	0	0	1	1	1	1	FLJ45079	FLJ45079 protein
hsa-miR-1324	0	0	1	0	1	1	C9orf170	chromosome 9 open reading frame 170
hsa-miR-1324	1	0	1	1	1	1	ATP1B1	ATPase, Na+/K+ transporting, beta 1 polypeptide
hsa-miR-1324	1	0	1	1	1	1	TPD52L3	tumor protein D52-like 3
hsa-miR-1324	1	0	1	1	1	1	AFTPH	aftiphilin
hsa-miR-1324	1	0	1	1	1	1	GATA3	GATA binding protein 3
hsa-miR-1324	1	0	1	1	1	1	WNK3	WNK lysine deficient protein kinase 3
hsa-miR-1324	1	0	1	0	1	1	CACNA1I	calcium channel, voltage-dependent, T type, alpha 1I subunit
hsa-miR-1324	1	0	1	1	1	1	RBMS3	RNA binding motif, single stranded interacting protein 3
hsa-miR-1324	0	0	1	1	1	1	TRIM6-TRIM34	TRIM6-TRIM34 readthrough
hsa-miR-1324	0	0	1	1	1	1	TRIM34	tripartite motif containing 34
hsa-miR-1324	1	0	1	0	1	1	BMF	Bcl2 modifying factor
hsa-miR-1324	0	0	1	1	1	1	CCDC144NL	coiled-coil domain containing 144 family, N-terminal like
hsa-miR-1324	1	0	1	0	1	1	LIN28B	lin-28 homolog B (C. elegans)
hsa-miR-1324	0	0	1	1	1	1	DBX2	developing brain homeobox 2
hsa-miR-1324	0	0	1	0	1	1	FLJ16124	FLJ16124 protein
hsa-miR-1324	0	0	1	1	0	0	LINGO4	leucine rich repeat and Ig domain containing 4
hsa-miR-1324	1	0	1	1	1	1	ACTR2	ARP2 actin-related protein 2 homolog (yeast)
hsa-miR-1324	1	0	1	0	1	1	YPEL2	yippee-like 2 (Drosophila)
hsa-miR-1324	1	0	1	1	1	1	EBF3	early B-cell factor 3
hsa-miR-1324	1	0	1	1	1	1	PLCXD3	phosphatidylinositol-specific phospholipase C, X domain containing 3
hsa-miR-1324	1	0	1	1	1	1	EDA	ectodysplasin A
hsa-miR-1324	1	0	1	1	1	1	ADAM9	ADAM metallopeptidase domain 9
hsa-miR-1324	1	0	1	0	1	1	IP6K1	inositol hexakisphosphate kinase 1
hsa-miR-1324	0	0	1	1	1	1	MAPKAP1	mitogen-activated protein kinase associated protein 1
hsa-miR-1324	1	0	1	1	1	1	TCEAL1	transcription elongation factor A (SII)-like 1
hsa-miR-1324	1	0	1	1	0	0	SDC1	syndecan 1
hsa-miR-1324	1	0	1	0	1	1	GOSR1	golgi SNAP receptor complex member 1
hsa-miR-1324	0	0	1	1	1	1	SCP2	sterol carrier protein 2
hsa-miR-1324	1	0	1	1	1	1	L3MBTL3	l(3)mbt-like 3 (Drosophila)
hsa-miR-1324	0	0	1	0	1	1	C8orf22	chromosome 8 open reading frame 22
hsa-miR-1324	1	0	1	1	1	1	IGF2BP2	insulin-like growth factor 2 mRNA binding protein 2
hsa-miR-1324	1	0	1	1	1	1	SPOP	speckle-type POZ protein
hsa-miR-1324	1	0	1	1	1	1	BRWD1	bromodomain and WD repeat domain containing 1
hsa-miR-1324	1	0	1	1	1	1	LMBRD2	LMBR1 domain containing 2
hsa-miR-1324	0	0	1	1	1	1	AKR1CL1	aldo-keto reductase family 1, member C-like 1
hsa-miR-1324	1	0	1	1	1	1	ZDHHC9	zinc finger, DHHC-type containing 9
hsa-miR-1324	0	0	1	1	1	1	UACA	uveal autoantigen with coiled-coil domains and ankyrin repeats
hsa-miR-1324	1	0	1	1	1	1	STEAP3	STEAP family member 3, metalloreductase
hsa-miR-1324	1	0	1	0	1	1	KIAA2022	KIAA2022
hsa-miR-1324	1	0	1	1	1	1	EML1	echinoderm microtubule associated protein like 1
hsa-miR-1324	0	0	1	1	1	1	CCDC147	coiled-coil domain containing 147
hsa-miR-1324	1	0	1	1	1	1	FNIP1	folliculin interacting protein 1
hsa-miR-1324	0	0	1	1	1	1	GCSAM	germinal center-associated, signaling and motility
hsa-miR-1324	0	0	1	1	0	0	ARMCX6	armadillo repeat containing, X-linked 6
hsa-miR-1324	0	0	1	1	1	1	ZCCHC11	zinc finger, CCHC domain containing 11
hsa-miR-1324	1	0	1	0	1	1	ERMN	ermin, ERM-like protein
hsa-miR-1324	0	0	1	0	1	1	ZNF648	zinc finger protein 648
hsa-miR-1324	1	0	1	0	1	1	FAM102B	family with sequence similarity 102, member B
hsa-miR-1324	1	0	1	0	1	1	ZC3H12B	zinc finger CCCH-type containing 12B
hsa-miR-1324	1	0	1	1	1	1	BCL2L15	BCL2-like 15
hsa-miR-1324	0	0	1	1	1	1	SAMD13	sterile alpha motif domain containing 13
hsa-miR-1324	1	0	1	0	1	1	FYTTD1	forty-two-three domain containing 1
hsa-miR-1324	1	0	1	0	1	1	FAM125B	family with sequence similarity 125, member B
hsa-miR-1324	0	0	1	1	0	0	CLEC18B	C-type lectin domain family 18, member B
hsa-miR-1324	1	0	1	1	1	1	GOSR2	golgi SNAP receptor complex member 2
hsa-miR-1324	0	0	1	1	1	1	SPIN4	spindlin family, member 4
hsa-miR-1324	0	0	1	1	1	1	CCNC	cyclin C
hsa-miR-1324	0	0	1	1	0	0	EPGN	epithelial mitogen homolog (mouse)
hsa-miR-1324	0	0	1	1	0	0	NHSL2	NHS-like 2
hsa-miR-1324	1	0	1	1	1	1	C12orf68	chromosome 12 open reading frame 68
hsa-miR-1324	0	0	1	1	0	0	VSIG8	V-set and immunoglobulin domain containing 8
hsa-miR-1324	1	0	1	0	1	1	FIGNL2	fidgetin-like 2
hsa-miR-1324	0	0	1	0	1	1	LINC00268	long intergenic non-protein coding RNA 268
hsa-miR-1324	0	0	1	1	0	0	SPRR2G	small proline-rich protein 2G
hsa-miR-1324	1	0	1	1	1	1	KCNMA1	potassium large conductance calcium-activated channel, subfamily M, alpha member 1
hsa-miR-1324	1	0	1	1	1	1	TMCC1	transmembrane and coiled-coil domain family 1
hsa-miR-1324	1	0	1	0	1	1	GOPC	golgi-associated PDZ and coiled-coil motif containing
hsa-miR-1324	0	0	1	1	1	1	DNTT	deoxynucleotidyltransferase, terminal
hsa-miR-1324	0	0	1	1	1	1	CARD16	caspase recruitment domain family, member 16
hsa-miR-1324	0	0	1	1	1	1	KIAA2026	KIAA2026
hsa-miR-1324	0	0	1	1	1	1	VPS13A	vacuolar protein sorting 13 homolog A (S. cerevisiae)
hsa-miR-1324	1	0	1	1	1	1	PFKFB2	6-phosphofructo-2-kinase/fructose-2,6-biphosphatase 2
hsa-miR-1324	0	0	1	1	1	1	ZNF187	zinc finger protein 187
hsa-miR-1324	1	0	1	1	1	1	ABCC5	ATP-binding cassette, sub-family C (CFTR/MRP), member 5
hsa-miR-1324	1	0	1	1	1	1	GPHN	gephyrin
hsa-miR-1324	1	0	1	1	1	1	CANX	calnexin
hsa-miR-1324	1	0	1	1	1	1	SH3KBP1	SH3-domain kinase binding protein 1
hsa-miR-1324	1	0	1	0	1	1	BCL7A	B-cell CLL/lymphoma 7A
hsa-miR-1324	1	0	1	0	1	1	TNRC6B	trinucleotide repeat containing 6B
hsa-miR-1324	0	0	1	1	0	0	ABCF1	ATP-binding cassette, sub-family F (GCN20), member 1
hsa-miR-1324	1	0	1	1	1	1	TPD52	tumor protein D52
hsa-miR-1324	1	0	1	0	1	1	C3orf70	chromosome 3 open reading frame 70
hsa-miR-1324	1	0	1	1	1	1	FAM108B1	family with sequence similarity 108, member B1
hsa-miR-1324	1	0	1	1	1	1	PLEKHG1	pleckstrin homology domain containing, family G (with RhoGef domain) member 1
hsa-miR-1324	1	0	1	0	1	1	MSRB3	methionine sulfoxide reductase B3
hsa-miR-1324	1	0	1	1	1	1	YTHDC1	YTH domain containing 1
hsa-miR-1324	1	0	1	1	1	1	ALDH3A2	aldehyde dehydrogenase 3 family, member A2
hsa-miR-1324	1	0	1	1	1	1	CSNK1G3	casein kinase 1, gamma 3
hsa-miR-1324	0	0	1	0	1	1	STXBP1	syntaxin binding protein 1
hsa-miR-1324	1	0	1	1	1	1	TFAP2A	transcription factor AP-2 alpha (activating enhancer binding protein 2 alpha)
hsa-miR-1324	1	0	1	0	1	1	GPR126	G protein-coupled receptor 126
hsa-miR-1324	1	0	1	1	1	1	C19orf6	chromosome 19 open reading frame 6
hsa-miR-1324	1	0	1	1	1	1	AMD1	adenosylmethionine decarboxylase 1
hsa-miR-1324	1	0	1	1	1	1	TMEM98	transmembrane protein 98
hsa-miR-1324	0	0	1	1	1	1	ERP29	endoplasmic reticulum protein 29
hsa-miR-1324	1	0	1	1	1	1	SMOC1	SPARC related modular calcium binding 1
hsa-miR-1324	1	0	1	0	1	1	RYR2	ryanodine receptor 2 (cardiac)
hsa-miR-1324	1	0	1	1	1	1	ACPL2	acid phosphatase-like 2
hsa-miR-1324	0	0	1	1	1	1	C18orf62	chromosome 18 open reading frame 62
hsa-miR-1324	1	0	1	1	1	1	DLX1	distal-less homeobox 1
hsa-miR-1324	1	0	1	0	1	1	CDC42SE1	CDC42 small effector 1
hsa-miR-1324	0	0	1	1	1	1	PRPS2	phosphoribosyl pyrophosphate synthetase 2
hsa-miR-1324	1	0	1	1	1	1	ELMO1	engulfment and cell motility 1
hsa-miR-1324	1	0	1	1	1	1	KIAA0317	KIAA0317
hsa-miR-1324	1	0	1	0	1	1	GK5	glycerol kinase 5 (putative)
hsa-miR-1324	1	0	1	1	1	1	SEC14L1	SEC14-like 1 (S. cerevisiae)
hsa-miR-1324	1	0	1	1	1	1	KCNC4	potassium voltage-gated channel, Shaw-related subfamily, member 4
hsa-miR-1324	1	0	1	0	1	1	CCNL2	cyclin L2
hsa-miR-1324	1	0	1	1	0	0	ANKRD34A	ankyrin repeat domain 34A
hsa-miR-1324	1	0	1	1	1	1	MLLT4	myeloid/lymphoid or mixed-lineage leukemia (trithorax homolog, Drosophila); translocated to, 4
hsa-miR-1324	1	0	1	1	1	1	LFNG	LFNG O-fucosylpeptide 3-beta-N-acetylglucosaminyltransferase
hsa-miR-1324	1	0	1	0	1	1	CD83	CD83 molecule
hsa-miR-1324	0	0	1	1	1	1	MTHFD2	methylenetetrahydrofolate dehydrogenase (NADP+ dependent) 2, methenyltetrahydrofolate cyclohydrolase
hsa-miR-1324	1	0	1	1	1	1	NCALD	neurocalcin delta
hsa-miR-1324	1	0	1	1	1	1	PRKAG2	protein kinase, AMP-activated, gamma 2 non-catalytic subunit
hsa-miR-1324	0	0	1	1	1	1	METTL21D	methyltransferase like 21D
hsa-miR-1324	1	0	1	1	1	1	HEY1	hairy/enhancer-of-split related with YRPW motif 1
hsa-miR-1324	0	0	1	1	1	1	GEMIN8	gem (nuclear organelle) associated protein 8
hsa-miR-1324	1	0	1	1	1	1	NSL1	NSL1, MIND kinetochore complex component, homolog (S. cerevisiae)
hsa-miR-1324	1	0	1	1	1	1	KDM5A	lysine (K)-specific demethylase 5A
hsa-miR-1324	0	0	1	1	1	1	SEC24B	SEC24 family, member B (S. cerevisiae)
hsa-miR-1324	0	0	1	1	1	1	SLC6A4	solute carrier family 6 (neurotransmitter transporter, serotonin), member 4
hsa-miR-1324	0	0	1	1	1	1	FAM22G	family with sequence similarity 22, member G
hsa-miR-1324	1	0	1	1	1	1	SLA	Src-like-adaptor
hsa-miR-1324	1	0	1	0	1	1	SLC12A2	solute carrier family 12 (sodium/potassium/chloride transporters), member 2
hsa-miR-1324	1	0	1	1	1	1	NET1	neuroepithelial cell transforming 1
hsa-miR-1324	0	0	1	1	1	1	SLC7A3	solute carrier family 7 (cationic amino acid transporter, y+ system), member 3
hsa-miR-1324	1	0	1	1	1	1	HIPK3	homeodomain interacting protein kinase 3
hsa-miR-1324	0	0	1	0	1	1	TOP2A	topoisomerase (DNA) II alpha 170kDa
hsa-miR-1324	0	0	1	1	1	1	TOP2B	topoisomerase (DNA) II beta 180kDa
hsa-miR-1324	1	0	1	1	1	1	QSER1	glutamine and serine rich 1
hsa-miR-1324	1	0	1	1	1	1	METTL9	methyltransferase like 9
hsa-miR-1324	1	0	1	1	1	1	HS6ST2	heparan sulfate 6-O-sulfotransferase 2
hsa-miR-1324	1	0	1	1	1	1	IRF2BP2	interferon regulatory factor 2 binding protein 2
hsa-miR-1324	1	0	1	1	1	1	PHF16	PHD finger protein 16
hsa-miR-1324	0	0	1	0	1	1	WTH3DI	RAB6C-like
hsa-miR-1324	1	0	1	0	0	0	FAM127B	family with sequence similarity 127, member B
hsa-miR-1324	1	0	1	1	1	1	UBN1	ubinuclein 1
hsa-miR-1324	0	0	1	1	1	1	TAX1BP1	Tax1 (human T-cell leukemia virus type I) binding protein 1
hsa-miR-1324	1	0	1	1	1	1	FAM155A	family with sequence similarity 155, member A
hsa-miR-1324	1	0	1	1	1	1	SHANK3	SH3 and multiple ankyrin repeat domains 3
hsa-miR-1324	0	0	1	1	1	1	TMEM202	transmembrane protein 202
hsa-miR-1324	1	0	1	0	1	1	ODZ3	odz, odd Oz/ten-m homolog 3 (Drosophila)
hsa-miR-1324	1	0	1	0	1	1	MEGF9	multiple EGF-like-domains 9
hsa-miR-1324	0	0	1	1	1	1	TBX18	T-box 18
hsa-miR-1324	1	0	1	1	1	1	MYO1C	myosin IC
hsa-miR-1324	1	0	1	1	1	1	REPS2	RALBP1 associated Eps domain containing 2
hsa-miR-1324	1	0	1	1	1	1	NXF1	nuclear RNA export factor 1
hsa-miR-1324	1	0	1	0	1	1	SCN3A	sodium channel, voltage-gated, type III, alpha subunit
hsa-miR-1324	1	0	1	0	1	1	PDE5A	phosphodiesterase 5A, cGMP-specific
hsa-miR-1324	1	0	1	1	1	1	ASIC1	acid-sensing (proton-gated) ion channel 1
hsa-miR-1324	1	0	1	1	1	1	ADAM10	ADAM metallopeptidase domain 10
hsa-miR-1324	1	0	1	1	1	1	APAF1	apoptotic peptidase activating factor 1
hsa-miR-1324	1	0	1	0	1	1	XIAP	X-linked inhibitor of apoptosis
hsa-miR-1324	0	0	1	1	1	1	ARHGAP6	Rho GTPase activating protein 6
hsa-miR-1324	0	0	1	1	0	0	ATP6AP1	ATPase, H+ transporting, lysosomal accessory protein 1
hsa-miR-1324	1	0	1	0	1	1	BMPR2	bone morphogenetic protein receptor, type II (serine/threonine kinase)
hsa-miR-1324	1	0	1	0	1	1	KLF9	Kruppel-like factor 9
hsa-miR-1324	1	0	1	1	1	1	CCNA2	cyclin A2
hsa-miR-1324	1	0	1	1	1	1	CHD1	chromodomain helicase DNA binding protein 1
hsa-miR-1324	0	0	1	1	0	0	CLPTM1	cleft lip and palate associated transmembrane protein 1
hsa-miR-1324	1	0	1	1	1	1	CREBL2	cAMP responsive element binding protein-like 2
hsa-miR-1324	0	0	1	1	1	1	DSCAM	Down syndrome cell adhesion molecule
hsa-miR-1324	1	0	1	1	1	1	CELSR3	cadherin, EGF LAG seven-pass G-type receptor 3 (flamingo homolog, Drosophila)
hsa-miR-1324	1	0	1	1	1	1	EIF1AX	eukaryotic translation initiation factor 1A, X-linked
hsa-miR-1324	0	0	1	0	1	1	EMP1	epithelial membrane protein 1
hsa-miR-1324	1	0	1	1	1	1	EN1	engrailed homeobox 1
hsa-miR-1324	1	0	1	0	1	1	GCNT2	glucosaminyl (N-acetyl) transferase 2, I-branching enzyme (I blood group)
hsa-miR-1324	1	0	1	1	1	1	GTF2B	general transcription factor IIB
hsa-miR-1324	1	0	1	1	1	1	NDST1	N-deacetylase/N-sulfotransferase (heparan glucosaminyl) 1
hsa-miR-1324	1	0	1	1	1	1	AHNAK	AHNAK nucleoprotein
hsa-miR-1324	1	0	1	1	1	1	ARF3	ADP-ribosylation factor 3
hsa-miR-1324	1	0	1	0	1	1	ARNT	aryl hydrocarbon receptor nuclear translocator
hsa-miR-1324	0	0	1	1	1	1	BTN1A1	butyrophilin, subfamily 1, member A1
hsa-miR-1324	1	0	1	1	1	1	CBFB	core-binding factor, beta subunit
hsa-miR-1324	1	0	1	0	1	1	CCND2	cyclin D2
hsa-miR-1324	0	0	1	1	1	1	CEACAM8	carcinoembryonic antigen-related cell adhesion molecule 8
hsa-miR-1324	1	0	1	1	1	1	COL4A1	collagen, type IV, alpha 1
hsa-miR-1324	1	0	1	1	1	1	COL4A6	collagen, type IV, alpha 6
hsa-miR-1324	1	0	1	0	1	1	COL19A1	collagen, type XIX, alpha 1
hsa-miR-1324	1	0	1	1	1	1	DPP4	dipeptidyl-peptidase 4
hsa-miR-1324	1	0	1	1	1	1	HBEGF	heparin-binding EGF-like growth factor
hsa-miR-1324	1	0	1	1	1	1	DUSP6	dual specificity phosphatase 6
hsa-miR-1324	1	0	1	1	1	1	E2F3	E2F transcription factor 3
hsa-miR-1324	0	0	1	1	0	0	EDN2	endothelin 2
hsa-miR-1324	0	0	1	1	0	0	EMR1	egf-like module containing, mucin-like, hormone receptor-like 1
hsa-miR-1324	1	0	1	1	1	1	FGF7	fibroblast growth factor 7
hsa-miR-1324	0	0	1	1	1	1	FLI1	Friend leukemia virus integration 1
hsa-miR-1324	0	0	1	1	1	1	FYN	FYN oncogene related to SRC, FGR, YES
hsa-miR-1324	0	0	1	1	0	0	GPX3	glutathione peroxidase 3 (plasma)
hsa-miR-1324	0	0	1	1	1	1	H2AFX	H2A histone family, member X
hsa-miR-1324	0	0	1	1	1	1	HOXB5	homeobox B5
hsa-miR-1324	0	0	1	1	1	1	FOXN2	forkhead box N2
hsa-miR-1324	1	0	1	1	0	0	IHH	Indian hedgehog
hsa-miR-1324	1	0	1	1	1	1	IL13	interleukin 13
hsa-miR-1324	1	0	1	1	1	1	INSM1	insulinoma-associated 1
hsa-miR-1324	1	0	1	1	1	1	KCNJ10	potassium inwardly-rectifying channel, subfamily J, member 10
hsa-miR-1324	1	0	1	1	1	1	KPNA4	karyopherin alpha 4 (importin alpha 3)
hsa-miR-1324	1	0	1	1	1	1	IPO5	importin 5
hsa-miR-1324	0	0	1	1	0	0	LGALS3	lectin, galactoside-binding, soluble, 3
hsa-miR-1324	1	0	1	1	1	1	LIFR	leukemia inhibitory factor receptor alpha
hsa-miR-1324	1	0	1	1	1	1	LRP1	low density lipoprotein receptor-related protein 1
hsa-miR-1324	1	0	1	0	1	1	MXD1	MAX dimerization protein 1
hsa-miR-1324	1	0	1	1	1	1	MAFG	v-maf musculoaponeurotic fibrosarcoma oncogene homolog G (avian)
hsa-miR-1324	0	0	1	1	1	1	MAG	myelin associated glycoprotein
hsa-miR-1324	1	0	1	1	1	1	ME1	malic enzyme 1, NADP(+)-dependent, cytosolic
hsa-miR-1324	0	0	1	0	1	1	CXCL9	chemokine (C-X-C motif) ligand 9
hsa-miR-1324	0	0	1	1	1	1	MMP19	matrix metallopeptidase 19
hsa-miR-1324	1	0	1	1	1	1	MN1	meningioma (disrupted in balanced translocation) 1
hsa-miR-1324	1	0	1	1	1	1	NEUROD1	neuronal differentiation 1
hsa-miR-1324	0	0	1	0	1	1	OAZ2	ornithine decarboxylase antizyme 2
hsa-miR-1324	0	0	1	0	1	1	OPHN1	oligophrenin 1
hsa-miR-1324	1	0	1	0	1	1	PAPPA	pregnancy-associated plasma protein A, pappalysin 1
hsa-miR-1324	1	0	1	1	1	1	PCDH8	protocadherin 8
hsa-miR-1324	1	0	1	0	1	1	CDK17	cyclin-dependent kinase 17
hsa-miR-1324	0	0	1	1	1	1	PIM1	pim-1 oncogene
hsa-miR-1324	0	0	1	1	0	0	PIP	prolactin-induced protein
hsa-miR-1324	0	0	1	1	1	1	PITX1	paired-like homeodomain 1
hsa-miR-1324	0	0	1	0	1	1	PMP2	peripheral myelin protein 2
hsa-miR-1324	0	0	1	1	0	0	PPBP	pro-platelet basic protein (chemokine (C-X-C motif) ligand 7)
hsa-miR-1324	1	0	1	1	1	1	PPP1CC	protein phosphatase 1, catalytic subunit, gamma isozyme
hsa-miR-1324	0	0	1	1	1	1	PPP1R3A	protein phosphatase 1, regulatory subunit 3A
hsa-miR-1324	0	0	1	1	0	0	PPP1R8	protein phosphatase 1, regulatory subunit 8
hsa-miR-1324	1	0	1	1	1	1	PPP2R1B	protein phosphatase 2, regulatory subunit A, beta
hsa-miR-1324	1	0	1	1	1	1	PRKD1	protein kinase D1
hsa-miR-1324	1	0	1	1	1	1	MAPK6	mitogen-activated protein kinase 6
hsa-miR-1324	0	0	1	1	1	1	MAP2K1	mitogen-activated protein kinase kinase 1
hsa-miR-1324	0	0	1	0	0	0	PSMB10	proteasome (prosome, macropain) subunit, beta type, 10
hsa-miR-1324	0	0	1	1	0	0	PSMC6	proteasome (prosome, macropain) 26S subunit, ATPase, 6
hsa-miR-1324	1	0	1	0	1	1	RAB6A	RAB6A, member RAS oncogene family
hsa-miR-1324	1	0	1	1	1	1	ARID4A	AT rich interactive domain 4A (RBP1-like)
hsa-miR-1324	0	0	1	1	1	1	RGS2	regulator of G-protein signaling 2, 24kDa
hsa-miR-1324	1	0	1	0	1	1	SORT1	sortilin 1
hsa-miR-1324	1	0	1	1	1	1	CCL21	chemokine (C-C motif) ligand 21
hsa-miR-1324	1	0	1	0	1	1	CCL22	chemokine (C-C motif) ligand 22
hsa-miR-1324	0	0	1	0	1	1	CXCL5	chemokine (C-X-C motif) ligand 5
hsa-miR-1324	0	0	1	1	1	1	XCL1	chemokine (C motif) ligand 1
hsa-miR-1324	1	0	1	1	1	1	SH3GL2	SH3-domain GRB2-like 2
hsa-miR-1324	1	0	1	1	1	1	SHB	Src homology 2 domain containing adaptor protein B
hsa-miR-1324	1	0	1	0	1	1	ST6GAL1	ST6 beta-galactosamide alpha-2,6-sialyltranferase 1
hsa-miR-1324	1	0	1	1	1	1	SNAI2	snail homolog 2 (Drosophila)
hsa-miR-1324	0	0	1	1	0	0	SNTA1	syntrophin, alpha 1
hsa-miR-1324	1	0	1	0	1	1	SOX4	SRY (sex determining region Y)-box 4
hsa-miR-1324	1	0	1	1	1	1	SRPR	signal recognition particle receptor (docking protein)
hsa-miR-1324	0	0	1	1	1	1	STIM1	stromal interaction molecule 1
hsa-miR-1324	1	0	1	0	1	1	RPS6KB1	ribosomal protein S6 kinase, 70kDa, polypeptide 1
hsa-miR-1324	1	0	1	1	1	1	SUV39H1	suppressor of variegation 3-9 homolog 1 (Drosophila)
hsa-miR-1324	1	0	1	1	1	1	SYN2	synapsin II
hsa-miR-1324	1	0	1	0	1	1	TAL1	T-cell acute lymphocytic leukemia 1
hsa-miR-1324	0	0	1	0	1	1	TCEA3	transcription elongation factor A (SII), 3
hsa-miR-1324	1	0	1	1	1	1	TFAP2B	transcription factor AP-2 beta (activating enhancer binding protein 2 beta)
hsa-miR-1324	1	0	1	1	1	1	TGFB3	transforming growth factor, beta 3
hsa-miR-1324	1	0	1	1	1	1	NR2C2	nuclear receptor subfamily 2, group C, member 2
hsa-miR-1324	0	0	1	1	1	1	UBE2E1	ubiquitin-conjugating enzyme E2E 1
hsa-miR-1324	0	0	1	1	1	1	UBE2I	ubiquitin-conjugating enzyme E2I
hsa-miR-1324	0	0	1	1	0	0	VGF	VGF nerve growth factor inducible
hsa-miR-1324	1	0	1	1	1	1	VSNL1	visinin-like 1
hsa-miR-1324	1	0	1	0	1	1	YWHAB	tyrosine 3-monooxygenase/tryptophan 5-monooxygenase activation protein, beta polypeptide
hsa-miR-1324	1	0	1	1	1	1	ZIC3	Zic family member 3
hsa-miR-1324	1	0	1	1	1	1	FZD5	frizzled family receptor 5
hsa-miR-1324	0	0	1	1	1	1	SCG2	secretogranin II
hsa-miR-1324	1	0	1	1	1	1	ADAM12	ADAM metallopeptidase domain 12
hsa-miR-1324	1	0	1	1	1	1	CUL5	cullin 5
hsa-miR-1324	1	0	1	1	1	1	HMGA2	high mobility group AT-hook 2
hsa-miR-1324	1	0	1	1	1	1	NRIP1	nuclear receptor interacting protein 1
hsa-miR-1324	1	0	1	0	1	1	SNN	stannin
hsa-miR-1324	1	0	1	1	1	1	FZD1	frizzled family receptor 1
hsa-miR-1324	1	0	1	1	1	1	FZD7	frizzled family receptor 7
hsa-miR-1324	0	0	1	1	1	1	PIP5K1A	phosphatidylinositol-4-phosphate 5-kinase, type I, alpha
hsa-miR-1324	0	0	1	1	1	1	STX7	syntaxin 7
hsa-miR-1324	0	0	1	1	1	1	SOAT2	sterol O-acyltransferase 2
hsa-miR-1324	1	0	1	1	1	1	SUPT3H	suppressor of Ty 3 homolog (S. cerevisiae)
hsa-miR-1324	0	0	1	1	1	1	CHST1	carbohydrate (keratan sulfate Gal-6) sulfotransferase 1
hsa-miR-1324	0	0	1	1	1	1	AP3B1	adaptor-related protein complex 3, beta 1 subunit
hsa-miR-1324	1	0	1	1	0	0	KHSRP	KH-type splicing regulatory protein
hsa-miR-1324	1	0	1	0	1	1	TNKS	tankyrase, TRF1-interacting ankyrin-related ADP-ribose polymerase
hsa-miR-1324	1	0	1	0	1	1	IRS2	insulin receptor substrate 2
hsa-miR-1324	1	0	1	1	1	1	URI1	URI1, prefoldin-like chaperone
hsa-miR-1324	0	0	1	1	1	1	CRADD	CASP2 and RIPK1 domain containing adaptor with death domain
hsa-miR-1324	0	0	1	1	0	0	SIGLEC5	sialic acid binding Ig-like lectin 5
hsa-miR-1324	1	0	1	1	1	1	IQGAP1	IQ motif containing GTPase activating protein 1
hsa-miR-1324	1	0	1	1	1	1	KAT2B	K(lysine) acetyltransferase 2B
hsa-miR-1324	0	0	1	1	1	1	PRPF4B	PRP4 pre-mRNA processing factor 4 homolog B (yeast)
hsa-miR-1324	1	0	1	1	1	1	PHOX2B	paired-like homeobox 2b
hsa-miR-1324	0	0	1	1	0	0	CDK5R2	cyclin-dependent kinase 5, regulatory subunit 2 (p39)
hsa-miR-1324	1	0	1	0	1	1	WASL	Wiskott-Aldrich syndrome-like
hsa-miR-1324	1	0	1	1	1	1	BCL2L2	BCL2-like 2
hsa-miR-1324	0	0	1	0	1	1	EIF4EBP2	eukaryotic translation initiation factor 4E binding protein 2
hsa-miR-1324	0	0	1	1	1	1	FLT3	fms-related tyrosine kinase 3
hsa-miR-1324	1	0	1	1	1	1	HNF4G	hepatocyte nuclear factor 4, gamma
hsa-miR-1324	1	0	1	1	1	1	RAB5A	RAB5A, member RAS oncogene family
hsa-miR-1324	1	0	1	0	1	1	SLC1A2	solute carrier family 1 (glial high affinity glutamate transporter), member 2
hsa-miR-1324	1	0	1	1	1	1	SYT7	synaptotagmin VII
hsa-miR-1324	0	0	1	0	1	1	TMSB4Y	thymosin beta 4, Y-linked
hsa-miR-1324	0	0	1	1	0	0	EBAG9	estrogen receptor binding site associated, antigen, 9
hsa-miR-1324	1	0	1	1	1	1	MFHAS1	malignant fibrous histiocytoma amplified sequence 1
hsa-miR-1324	0	0	1	1	1	1	HOMER1	homer homolog 1 (Drosophila)
hsa-miR-1324	1	0	1	0	1	1	CHST3	carbohydrate (chondroitin 6) sulfotransferase 3
hsa-miR-1324	1	0	1	0	1	1	AKAP6	A kinase (PRKA) anchor protein 6
hsa-miR-1324	1	0	1	1	1	1	TRAF4	TNF receptor-associated factor 4
hsa-miR-1324	1	0	1	0	1	1	ACVR1B	activin A receptor, type IB
hsa-miR-1324	1	0	1	1	1	1	DACH1	dachshund homolog 1 (Drosophila)
hsa-miR-1324	1	0	1	1	1	1	DBN1	drebrin 1
hsa-miR-1324	1	0	1	1	1	1	DUSP2	dual specificity phosphatase 2
hsa-miR-1324	1	0	1	1	1	1	DUSP8	dual specificity phosphatase 8
hsa-miR-1324	1	0	1	1	1	1	EGR3	early growth response 3
hsa-miR-1324	1	0	1	1	1	1	EPS8	epidermal growth factor receptor pathway substrate 8
hsa-miR-1324	1	0	1	1	1	1	FOXD2	forkhead box D2
hsa-miR-1324	1	0	1	0	1	1	ARHGAP35	Rho GTPase activating protein 35
hsa-miR-1324	0	0	1	1	1	1	FOXA1	forkhead box A1
hsa-miR-1324	1	0	1	1	1	1	LRP2	low density lipoprotein receptor-related protein 2
hsa-miR-1324	1	0	1	1	1	1	MLLT3	myeloid/lymphoid or mixed-lineage leukemia (trithorax homolog, Drosophila); translocated to, 3
hsa-miR-1324	0	0	1	0	1	1	POU4F2	POU class 4 homeobox 2
hsa-miR-1324	0	0	1	1	1	1	RAB27A	RAB27A, member RAS oncogene family
hsa-miR-1324	0	0	1	1	0	0	SNRPD2	small nuclear ribonucleoprotein D2 polypeptide 16.5kDa
hsa-miR-1324	0	0	1	1	0	0	PRY	PTPN13-like, Y-linked
hsa-miR-1324	1	0	1	1	1	1	MTMR4	myotubularin related protein 4
hsa-miR-1324	1	0	1	1	1	1	SCAF11	SR-related CTD-associated factor 11
hsa-miR-1324	1	0	1	0	1	1	MAPKAPK2	mitogen-activated protein kinase-activated protein kinase 2
hsa-miR-1324	0	0	1	1	0	0	ASIC3	acid-sensing (proton-gated) ion channel 3
hsa-miR-1324	1	0	1	1	1	1	NREP	neuronal regeneration related protein homolog (rat)
hsa-miR-1324	0	0	1	1	1	1	TAOK2	TAO kinase 2
hsa-miR-1324	1	0	1	1	1	1	KIF3B	kinesin family member 3B
hsa-miR-1324	0	0	1	0	1	1	CIAO1	cytosolic iron-sulfur protein assembly 1
hsa-miR-1324	0	0	1	1	1	1	TJP2	tight junction protein 2
hsa-miR-1324	1	0	1	0	1	1	CDYL	chromodomain protein, Y-like
hsa-miR-1324	1	0	1	1	1	1	MED26	mediator complex subunit 26
hsa-miR-1324	1	0	1	1	1	1	AKAP7	A kinase (PRKA) anchor protein 7
hsa-miR-1324	1	0	1	0	1	1	ROCK2	Rho-associated, coiled-coil containing protein kinase 2
hsa-miR-1324	1	0	1	1	1	1	ONECUT2	one cut homeobox 2
hsa-miR-1324	1	0	1	1	1	1	KIF23	kinesin family member 23
hsa-miR-1324	0	0	1	1	1	1	CLCA3P	chloride channel accessory 3, pseudogene
hsa-miR-1324	0	0	1	1	1	1	CALB1	calbindin 1, 28kDa
hsa-miR-1324	0	0	1	1	1	1	CDH6	cadherin 6, type 2, K-cadherin (fetal kidney)
hsa-miR-1324	1	0	1	0	1	1	KRAS	v-Ki-ras2 Kirsten rat sarcoma viral oncogene homolog
hsa-miR-1324	1	0	1	1	0	0	MMP14	matrix metallopeptidase 14 (membrane-inserted)
hsa-miR-1324	1	0	1	1	1	1	PIK3CD	phosphatidylinositol-4,5-bisphosphate 3-kinase, catalytic subunit delta
hsa-miR-1324	0	0	1	1	0	0	RLN2	relaxin 2
hsa-miR-1324	1	0	1	0	1	1	SCD	stearoyl-CoA desaturase (delta-9-desaturase)
hsa-miR-1324	1	0	1	1	1	1	HS3ST1	heparan sulfate (glucosamine) 3-O-sulfotransferase 1
hsa-miR-1324	0	0	1	1	1	1	CLEC2B	C-type lectin domain family 2, member B
hsa-miR-1324	1	0	1	1	1	1	CBL	Cbl proto-oncogene, E3 ubiquitin protein ligase
hsa-miR-1324	1	0	1	1	1	1	FOXN3	forkhead box N3
hsa-miR-1324	1	0	1	1	1	1	ARID3A	AT rich interactive domain 3A (BRIGHT-like)
hsa-miR-1324	1	0	1	0	1	1	E2F1	E2F transcription factor 1
hsa-miR-1324	1	0	1	1	1	1	ELK3	ELK3, ETS-domain protein (SRF accessory protein 2)
hsa-miR-1324	1	0	1	1	1	1	GABPB1	GA binding protein transcription factor, beta subunit 1
hsa-miR-1324	1	0	1	0	1	1	RAPGEF1	Rap guanine nucleotide exchange factor (GEF) 1
hsa-miR-1324	1	0	1	1	1	1	RAB8A	RAB8A, member RAS oncogene family
hsa-miR-1324	1	0	1	1	1	1	MYCL1	v-myc myelocytomatosis viral oncogene homolog 1, lung carcinoma derived (avian)
hsa-miR-1324	0	0	1	1	1	1	NFIL3	nuclear factor, interleukin 3 regulated
hsa-miR-1324	1	0	1	1	1	1	PDCL	phosducin-like
hsa-miR-1324	0	0	1	1	1	1	CXCL11	chemokine (C-X-C motif) ligand 11
hsa-miR-1324	0	0	1	1	1	1	SEPP1	selenoprotein P, plasma, 1
hsa-miR-1324	1	0	1	0	1	1	SRC	v-src sarcoma (Schmidt-Ruppin A-2) viral oncogene homolog (avian)
hsa-miR-1324	0	0	1	1	1	1	ST5	suppression of tumorigenicity 5
hsa-miR-1324	1	0	1	1	1	1	MAFB	v-maf musculoaponeurotic fibrosarcoma oncogene homolog B (avian)
hsa-miR-1324	1	0	1	1	1	1	PIGK	phosphatidylinositol glycan anchor biosynthesis, class K
hsa-miR-1324	1	0	1	1	1	1	ABCA1	ATP-binding cassette, sub-family A (ABC1), member 1
hsa-miR-1324	1	0	1	1	1	1	GTF2E1	general transcription factor IIE, polypeptide 1, alpha 56kDa
hsa-miR-1324	1	0	1	1	1	1	INSIG1	insulin induced gene 1
hsa-miR-1324	0	0	1	1	1	1	LIMK2	LIM domain kinase 2
hsa-miR-1324	0	0	1	1	1	1	LMAN1	lectin, mannose-binding, 1
hsa-miR-1324	1	0	1	1	1	1	LPP	LIM domain containing preferred translocation partner in lipoma
hsa-miR-1324	1	0	1	1	1	1	RGS4	regulator of G-protein signaling 4
hsa-miR-1324	0	0	1	1	1	1	CCL8	chemokine (C-C motif) ligand 8
hsa-miR-1324	1	0	1	1	1	1	TERF2	telomeric repeat binding factor 2
hsa-miR-1324	0	0	1	1	1	1	GPR52	G protein-coupled receptor 52
hsa-miR-1324	1	0	1	1	0	0	DPP3	dipeptidyl-peptidase 3
hsa-miR-1324	1	0	1	1	1	1	GIPC1	GIPC PDZ domain containing family, member 1
hsa-miR-1324	1	0	1	1	1	1	ARPC5	actin related protein 2/3 complex, subunit 5, 16kDa
hsa-miR-1324	1	0	1	0	1	1	TSPAN2	tetraspanin 2
hsa-miR-1324	1	0	1	1	1	1	ACTR1A	ARP1 actin-related protein 1 homolog A, centractin alpha (yeast)
hsa-miR-1324	1	0	1	1	1	1	NAMPT	nicotinamide phosphoribosyltransferase
hsa-miR-1324	0	0	1	0	1	1	CD96	CD96 molecule
hsa-miR-1324	1	0	1	0	1	1	SPRY3	sprouty homolog 3 (Drosophila)
hsa-miR-1324	1	0	1	1	1	1	EFS	embryonal Fyn-associated substrate
hsa-miR-1324	0	0	1	1	1	1	DSCR4	Down syndrome critical region gene 4
hsa-miR-1324	1	0	1	1	1	1	MAT2A	methionine adenosyltransferase II, alpha
hsa-miR-1324	1	0	1	1	1	1	MAP3K5	mitogen-activated protein kinase kinase kinase 5
hsa-miR-1324	1	0	1	1	1	1	MTF1	metal-regulatory transcription factor 1
hsa-miR-1324	0	0	1	1	1	1	STK10	serine/threonine kinase 10
hsa-miR-1324	0	0	1	1	1	1	TSC22D1	TSC22 domain family, member 1
hsa-miR-1324	1	0	1	1	1	1	HS3ST4	heparan sulfate (glucosamine) 3-O-sulfotransferase 4
hsa-miR-1324	0	0	1	1	1	1	LANCL1	LanC lantibiotic synthetase component C-like 1 (bacterial)
hsa-miR-1324	0	0	1	1	1	1	SMYD5	SMYD family member 5
hsa-miR-1324	1	0	1	1	1	1	NEFL	neurofilament, light polypeptide
hsa-miR-1324	1	0	1	1	1	1	PCBP1	poly(rC) binding protein 1
hsa-miR-1324	1	0	1	1	1	1	CDK16	cyclin-dependent kinase 16
hsa-miR-1324	0	0	1	1	1	1	PRKCH	protein kinase C, eta
hsa-miR-1324	1	0	1	1	1	1	RAD21	RAD21 homolog (S. pombe)
hsa-miR-1324	1	0	1	1	1	1	SMC1A	structural maintenance of chromosomes 1A
hsa-miR-1324	1	0	1	1	1	1	FBLN5	fibulin 5
hsa-miR-1324	1	0	1	1	1	1	ZNF238	zinc finger protein 238
hsa-miR-1324	0	0	1	1	1	1	CAP2	CAP, adenylate cyclase-associated protein, 2 (yeast)
hsa-miR-1324	1	0	1	1	1	1	VAT1	vesicle amine transport protein 1 homolog (T. californica)
hsa-miR-1324	1	0	1	0	1	1	APPBP2	amyloid beta precursor protein (cytoplasmic tail) binding protein 2
hsa-miR-1324	1	0	1	1	1	1	NEBL	nebulette
hsa-miR-1324	0	0	1	1	1	1	HBXIP	hepatitis B virus x interacting protein
hsa-miR-1324	1	0	1	1	1	1	AGR2	anterior gradient 2 homolog (Xenopus laevis)
hsa-miR-1324	0	0	1	1	1	1	PARP4	poly (ADP-ribose) polymerase family, member 4
hsa-miR-1324	1	0	1	0	1	1	GNAI3	guanine nucleotide binding protein (G protein), alpha inhibiting activity polypeptide 3
hsa-miR-1324	0	0	1	1	1	1	CLCA2	chloride channel accessory 2
hsa-miR-1324	1	0	1	0	1	1	IGF2BP1	insulin-like growth factor 2 mRNA binding protein 1
hsa-miR-1324	0	0	1	1	1	1	KHDRBS3	KH domain containing, RNA binding, signal transduction associated 3
hsa-miR-1324	1	0	1	1	1	1	CTCF	CCCTC-binding factor (zinc finger protein)
hsa-miR-1324	0	0	1	1	1	1	POLD3	polymerase (DNA-directed), delta 3, accessory subunit
hsa-miR-1324	0	0	1	1	0	0	SLC12A7	solute carrier family 12 (potassium/chloride transporters), member 7
hsa-miR-1324	0	0	1	1	0	0	KIF1C	kinesin family member 1C
hsa-miR-1324	1	0	1	1	1	1	ZBTB6	zinc finger and BTB domain containing 6
hsa-miR-1324	0	0	1	1	1	1	PPP1R17	protein phosphatase 1, regulatory subunit 17
hsa-miR-1324	1	0	1	1	1	1	PGRMC1	progesterone receptor membrane component 1
hsa-miR-1324	1	0	1	1	1	1	MMP24	matrix metallopeptidase 24 (membrane-inserted)
hsa-miR-1324	0	0	1	1	1	1	LYVE1	lymphatic vessel endothelial hyaluronan receptor 1
hsa-miR-1324	0	0	1	1	1	1	NUDT3	nudix (nucleoside diphosphate linked moiety X)-type motif 3
hsa-miR-1324	0	0	1	0	1	1	SUB1	SUB1 homolog (S. cerevisiae)
hsa-miR-1324	1	0	1	1	1	1	SPIN1	spindlin 1
hsa-miR-1324	1	0	1	1	1	1	CDH10	cadherin 10, type 2 (T2-cadherin)
hsa-miR-1324	1	0	1	1	1	1	DIAPH2	diaphanous homolog 2 (Drosophila)
hsa-miR-1324	1	0	1	1	1	1	BTG2	BTG family, member 2
hsa-miR-1324	0	0	1	1	1	1	ASCC3	activating signal cointegrator 1 complex subunit 3
hsa-miR-1324	1	0	1	1	1	1	FERMT2	fermitin family member 2
hsa-miR-1324	0	0	1	1	1	1	ATF7	activating transcription factor 7
hsa-miR-1324	1	0	1	1	1	1	B3GNT1	UDP-GlcNAc:betaGal beta-1,3-N-acetylglucosaminyltransferase 1
hsa-miR-1324	0	0	1	1	1	1	HOXD3	homeobox D3
hsa-miR-1324	1	0	1	1	1	1	RIT1	Ras-like without CAAX 1
hsa-miR-1324	0	0	1	1	0	0	SMTN	smoothelin
hsa-miR-1324	1	0	1	0	1	1	SOX12	SRY (sex determining region Y)-box 12
hsa-miR-1324	1	0	1	1	1	1	NR4A3	nuclear receptor subfamily 4, group A, member 3
hsa-miR-1324	1	0	1	1	1	1	PTPN21	protein tyrosine phosphatase, non-receptor type 21
hsa-miR-1324	1	0	1	1	1	1	KAT7	K(lysine) acetyltransferase 7
hsa-miR-1324	1	0	1	1	1	1	SOX21	SRY (sex determining region Y)-box 21
hsa-miR-1324	1	0	1	1	1	1	UBL3	ubiquitin-like 3
hsa-miR-1324	1	0	1	1	1	1	ZNF81	zinc finger protein 81
hsa-miR-1324	1	0	1	1	1	1	VEZF1	vascular endothelial zinc finger 1
hsa-miR-1324	0	0	1	0	1	1	ZXDB	zinc finger, X-linked, duplicated B
hsa-miR-1324	1	0	1	0	1	1	PRSS23	protease, serine, 23
hsa-miR-1324	1	0	1	1	1	1	ERLIN2	ER lipid raft associated 2
hsa-miR-1324	1	0	1	1	1	1	ABCF2	ATP-binding cassette, sub-family F (GCN20), member 2
hsa-miR-1324	1	0	1	1	1	1	CA5B	carbonic anhydrase VB, mitochondrial
hsa-miR-1324	0	0	1	0	1	1	PNMA2	paraneoplastic Ma antigen 2
hsa-miR-1324	0	0	1	0	1	1	AP4E1	adaptor-related protein complex 4, epsilon 1 subunit
hsa-miR-1324	1	0	1	1	1	1	PADI2	peptidyl arginine deiminase, type II
hsa-miR-1324	1	0	1	1	1	1	TARDBP	TAR DNA binding protein
hsa-miR-1324	0	0	1	1	0	0	DPF3	D4, zinc and double PHD fingers, family 3
hsa-miR-1324	1	0	1	1	1	1	ICOS	inducible T-cell co-stimulator
hsa-miR-1324	0	0	1	1	1	1	FOXI1	forkhead box I1
hsa-miR-1324	1	0	1	0	1	1	FZD4	frizzled family receptor 4
hsa-miR-1324	0	0	1	1	1	1	RAB3GAP1	RAB3 GTPase activating protein subunit 1 (catalytic)
hsa-miR-1324	1	0	1	1	1	1	RYBP	RING1 and YY1 binding protein
hsa-miR-1324	1	0	1	1	1	1	HS2ST1	heparan sulfate 2-O-sulfotransferase 1
hsa-miR-1324	1	0	1	1	1	1	KCNH4	potassium voltage-gated channel, subfamily H (eag-related), member 4
hsa-miR-1324	1	0	1	0	1	1	PXDN	peroxidasin homolog (Drosophila)
hsa-miR-1324	1	0	1	0	1	1	G3BP2	GTPase activating protein (SH3 domain) binding protein 2
hsa-miR-1324	1	0	1	0	1	1	FBXL7	F-box and leucine-rich repeat protein 7
hsa-miR-1324	0	0	1	1	1	1	SLC39A6	solute carrier family 39 (zinc transporter), member 6
hsa-miR-1324	1	0	1	0	1	1	MYCBP	c-myc binding protein
hsa-miR-1324	1	0	1	0	1	1	MYO10	myosin X
hsa-miR-1324	1	0	1	1	1	1	RGS17	regulator of G-protein signaling 17
hsa-miR-1324	1	0	1	1	1	1	TLL2	tolloid-like 2
hsa-miR-1324	1	0	1	1	1	1	TRPC5	transient receptor potential cation channel, subfamily C, member 5
hsa-miR-1324	1	0	1	1	1	1	YWHAG	tyrosine 3-monooxygenase/tryptophan 5-monooxygenase activation protein, gamma polypeptide
hsa-miR-1324	0	0	1	1	1	1	N6AMT1	N-6 adenine-specific DNA methyltransferase 1 (putative)
hsa-miR-1324	1	0	1	1	1	1	PPARGC1A	peroxisome proliferator-activated receptor gamma, coactivator 1 alpha
hsa-miR-1324	1	0	1	0	1	1	RBM15B	RNA binding motif protein 15B
hsa-miR-1324	0	0	1	1	1	1	SERTAD1	SERTA domain containing 1
hsa-miR-1324	1	0	1	1	1	1	SLC25A24	solute carrier family 25 (mitochondrial carrier; phosphate carrier), member 24
hsa-miR-1324	1	0	1	1	1	1	LRP12	low density lipoprotein receptor-related protein 12
hsa-miR-1324	0	0	1	1	1	1	UBQLN1	ubiquilin 1
hsa-miR-1324	0	0	1	0	1	1	EMR2	egf-like module containing, mucin-like, hormone receptor-like 2
hsa-miR-1324	1	0	1	0	1	1	CHMP2B	charged multivesicular body protein 2B
hsa-miR-1324	0	0	1	1	1	1	CCDC113	coiled-coil domain containing 113
hsa-miR-1324	0	0	1	0	1	1	ADAMTS3	ADAM metallopeptidase with thrombospondin type 1 motif, 3
hsa-miR-1324	1	0	1	0	1	1	ODZ1	odz, odd Oz/ten-m homolog 1 (Drosophila)
hsa-miR-1324	0	0	1	1	1	1	ADAM28	ADAM metallopeptidase domain 28
hsa-miR-1324	1	0	1	1	1	1	C11orf58	chromosome 11 open reading frame 58
hsa-miR-1324	0	0	1	1	1	1	DNAJC8	DnaJ (Hsp40) homolog, subfamily C, member 8
hsa-miR-1324	0	0	1	1	1	1	DAPK2	death-associated protein kinase 2
hsa-miR-1324	0	0	1	0	1	1	EID1	EP300 interacting inhibitor of differentiation 1
hsa-miR-1324	1	0	1	1	1	1	LHX6	LIM homeobox 6
hsa-miR-1324	1	0	1	0	1	1	RNF11	ring finger protein 11
hsa-miR-1324	1	0	1	1	0	0	SND1	staphylococcal nuclease and tudor domain containing 1
hsa-miR-1324	1	0	1	1	1	1	AFF4	AF4/FMR2 family, member 4
hsa-miR-1324	1	0	1	1	1	1	TNFRSF21	tumor necrosis factor receptor superfamily, member 21
hsa-miR-1324	1	0	1	1	1	1	CNOT2	CCR4-NOT transcription complex, subunit 2
hsa-miR-1324	0	0	1	1	1	1	ARFGAP3	ADP-ribosylation factor GTPase activating protein 3
hsa-miR-1324	1	0	1	0	1	1	HUNK	hormonally up-regulated Neu-associated kinase
hsa-miR-1324	1	0	1	1	1	1	CDR2L	cerebellar degeneration-related protein 2-like
hsa-miR-1324	1	0	1	1	1	1	ZNF592	zinc finger protein 592
hsa-miR-1324	1	0	1	0	1	1	SH3PXD2A	SH3 and PX domains 2A
hsa-miR-1324	1	0	1	1	1	1	RALGPS1	Ral GEF with PH domain and SH3 binding motif 1
hsa-miR-1324	1	0	1	1	0	0	TTLL4	tubulin tyrosine ligase-like family, member 4
hsa-miR-1324	1	0	1	0	1	1	BZW1	basic leucine zipper and W2 domains 1
hsa-miR-1324	1	0	1	1	1	1	ARHGAP32	Rho GTPase activating protein 32
hsa-miR-1324	1	0	1	1	1	1	TBKBP1	TBK1 binding protein 1
hsa-miR-1324	1	0	1	0	1	1	TOX	thymocyte selection-associated high mobility group box
hsa-miR-1324	1	0	1	1	1	1	DAZAP2	DAZ associated protein 2
hsa-miR-1324	1	0	1	1	0	0	ARHGEF17	Rho guanine nucleotide exchange factor (GEF) 17
hsa-miR-1324	1	0	1	1	1	1	TOMM70A	translocase of outer mitochondrial membrane 70 homolog A (S. cerevisiae)
hsa-miR-1324	1	0	1	1	1	1	FCHSD2	FCH and double SH3 domains 2
hsa-miR-1324	0	0	1	1	1	1	KIAA0196	KIAA0196
hsa-miR-1324	1	0	1	0	1	1	ZBTB40	zinc finger and BTB domain containing 40
hsa-miR-1324	1	0	1	1	1	1	ZBTB5	zinc finger and BTB domain containing 5
hsa-miR-1324	1	0	1	1	1	1	JOSD1	Josephin domain containing 1
hsa-miR-1324	1	0	1	0	1	1	PDAP1	PDGFA associated protein 1
hsa-miR-1324	0	0	1	0	1	1	PPM1E	protein phosphatase, Mg2+/Mn2+ dependent, 1E
hsa-miR-1324	1	0	1	0	1	1	ICK	intestinal cell (MAK-like) kinase
hsa-miR-1324	1	0	1	1	1	1	PLEKHA6	pleckstrin homology domain containing, family A member 6
hsa-miR-1324	1	0	1	0	1	1	WDFY3	WD repeat and FYVE domain containing 3
hsa-miR-1324	1	0	1	1	1	1	STK38L	serine/threonine kinase 38 like
hsa-miR-1324	1	0	1	1	1	1	FBXO21	F-box protein 21
hsa-miR-1324	1	0	1	0	1	1	PDS5B	PDS5, regulator of cohesion maintenance, homolog B (S. cerevisiae)
hsa-miR-1324	1	0	1	1	1	1	PIKFYVE	phosphoinositide kinase, FYVE finger containing
hsa-miR-1324	1	0	1	1	1	1	TRAK2	trafficking protein, kinesin binding 2
hsa-miR-1324	0	0	1	1	0	0	AVL9	AVL9 homolog (S. cerevisiase)
hsa-miR-1324	1	0	1	0	1	1	PEG10	paternally expressed 10
hsa-miR-1324	1	0	1	1	1	1	ZNF423	zinc finger protein 423
hsa-miR-1324	1	0	1	1	1	1	RTF1	Rtf1, Paf1/RNA polymerase II complex component, homolog (S. cerevisiae)
hsa-miR-1324	1	0	1	1	0	0	RFTN1	raftlin, lipid raft linker 1
hsa-miR-1324	0	0	1	1	1	1	ARL6IP1	ADP-ribosylation factor-like 6 interacting protein 1
hsa-miR-1324	1	0	1	1	1	1	PLCB1	phospholipase C, beta 1 (phosphoinositide-specific)
hsa-miR-1324	1	0	1	1	1	1	PDS5A	PDS5, regulator of cohesion maintenance, homolog A (S. cerevisiae)
hsa-miR-1324	1	0	1	1	1	1	ANKS1A	ankyrin repeat and sterile alpha motif domain containing 1A
hsa-miR-1324	1	0	1	1	1	1	CUX2	cut-like homeobox 2
hsa-miR-1324	1	0	1	0	1	1	SRGAP2	SLIT-ROBO Rho GTPase activating protein 2
hsa-miR-1324	1	0	1	1	1	1	NUDCD3	NudC domain containing 3
hsa-miR-1324	1	0	1	1	1	1	MED13L	mediator complex subunit 13-like
hsa-miR-1324	0	0	1	0	1	1	ZDHHC17	zinc finger, DHHC-type containing 17
hsa-miR-1324	0	0	1	1	1	1	LEPROTL1	leptin receptor overlapping transcript-like 1
hsa-miR-1324	1	0	1	1	1	1	MOB4	MOB family member 4, phocein
hsa-miR-1324	1	0	1	1	1	1	PARM1	prostate androgen-regulated mucin-like protein 1
hsa-miR-1324	0	0	1	1	1	1	ZNF10	zinc finger protein 10
hsa-miR-1324	0	0	1	1	0	0	TSKU	tsukushi small leucine rich proteoglycan homolog (Xenopus laevis)
hsa-miR-1324	1	0	1	1	1	1	CHD5	chromodomain helicase DNA binding protein 5
hsa-miR-1324	1	0	1	0	1	1	PPP1R16B	protein phosphatase 1, regulatory subunit 16B
hsa-miR-1324	0	0	1	1	0	0	KLK13	kallikrein-related peptidase 13
hsa-miR-1324	1	0	1	1	1	1	FAM155B	family with sequence similarity 155, member B
hsa-miR-1324	0	0	1	1	1	1	BRPF3	bromodomain and PHD finger containing, 3
hsa-miR-1324	0	0	1	1	1	1	KRT76	keratin 76
hsa-miR-1324	1	0	1	1	1	1	AZIN1	antizyme inhibitor 1
hsa-miR-1324	1	0	1	1	1	1	ST8SIA3	ST8 alpha-N-acetyl-neuraminide alpha-2,8-sialyltransferase 3
hsa-miR-1324	0	0	1	1	1	1	SNX7	sorting nexin 7
hsa-miR-1324	0	0	1	1	1	1	SCCPDH	saccharopine dehydrogenase (putative)
hsa-miR-1324	1	0	1	1	1	1	PHF20L1	PHD finger protein 20-like 1
hsa-miR-1324	1	0	1	1	1	1	GOLT1B	golgi transport 1B
hsa-miR-1324	0	0	1	1	1	1	NAA20	N(alpha)-acetyltransferase 20, NatB catalytic subunit
hsa-miR-1324	0	0	1	1	1	1	RAB10	RAB10, member RAS oncogene family
hsa-miR-1324	0	0	1	1	1	1	DYNC1LI1	dynein, cytoplasmic 1, light intermediate chain 1
hsa-miR-1324	1	0	1	1	1	1	VGLL3	vestigial like 3 (Drosophila)
hsa-miR-1324	1	0	1	0	1	1	HECA	headcase homolog (Drosophila)
hsa-miR-1324	0	0	1	1	1	1	IMPG2	interphotoreceptor matrix proteoglycan 2
hsa-miR-1324	1	0	1	0	1	1	HPCAL4	hippocalcin like 4
hsa-miR-1324	1	0	1	1	1	1	CMPK1	cytidine monophosphate (UMP-CMP) kinase 1, cytosolic
hsa-miR-1324	0	0	1	1	1	1	ATPIF1	ATPase inhibitory factor 1
hsa-miR-1324	1	0	1	1	1	1	RAB14	RAB14, member RAS oncogene family
hsa-miR-1324	0	0	1	1	1	1	CENPF	centromere protein F, 350/400kDa (mitosin)
hsa-miR-1324	1	0	1	1	0	0	CPA4	carboxypeptidase A4
hsa-miR-1324	0	0	1	1	1	1	UFC1	ubiquitin-fold modifier conjugating enzyme 1
hsa-miR-1324	1	0	1	1	1	1	PHF20	PHD finger protein 20
hsa-miR-1324	0	0	1	1	0	0	FAM203A	family with sequence similarity 203, member A
hsa-miR-1324	0	0	1	0	1	1	GPR83	G protein-coupled receptor 83
hsa-miR-1324	1	0	1	1	1	1	IER5	immediate early response 5
hsa-miR-1324	1	0	1	1	1	1	RAB6B	RAB6B, member RAS oncogene family
hsa-miR-1324	1	0	1	1	1	1	WAC	WW domain containing adaptor with coiled-coil
hsa-miR-1324	1	0	1	1	1	1	ZAK	sterile alpha motif and leucine zipper containing kinase AZK
hsa-miR-1324	1	0	1	0	1	1	FZD3	frizzled family receptor 3
hsa-miR-1324	0	0	1	1	1	1	USP18	ubiquitin specific peptidase 18
hsa-miR-1324	1	0	1	0	1	1	KLHL3	kelch-like 3 (Drosophila)
hsa-miR-1324	1	0	1	1	1	1	CPSF2	cleavage and polyadenylation specific factor 2, 100kDa
hsa-miR-1324	1	0	1	1	1	1	PLXNA3	plexin A3
hsa-miR-1324	1	0	1	1	1	1	ARID1B	AT rich interactive domain 1B (SWI1-like)
hsa-miR-1324	0	0	1	0	1	1	TRIM44	tripartite motif containing 44
hsa-miR-1324	1	0	1	1	1	1	ZC3H7B	zinc finger CCCH-type containing 7B
hsa-miR-1324	1	0	1	0	1	1	EIF2C4	eukaryotic translation initiation factor 2C, 4
hsa-miR-1324	0	0	1	1	1	1	LRRC16A	leucine rich repeat containing 16A
hsa-miR-1324	1	0	1	1	1	1	CNNM2	cyclin M2
hsa-miR-1324	1	0	1	1	1	1	ZNF280C	zinc finger protein 280C
hsa-miR-1324	0	0	1	0	1	1	OTUB1	OTU domain, ubiquitin aldehyde binding 1
hsa-miR-1324	0	0	1	1	1	1	MTMR8	myotubularin related protein 8
hsa-miR-1324	0	0	1	0	1	1	THUMPD1	THUMP domain containing 1
hsa-miR-1324	0	0	1	1	0	0	TEX10	testis expressed 10
hsa-miR-1324	0	0	1	1	1	1	WHSC1L1	Wolf-Hirschhorn syndrome candidate 1-like 1
hsa-miR-1324	0	0	1	1	1	1	ACSM5	acyl-CoA synthetase medium-chain family member 5
hsa-miR-1324	1	0	1	1	1	1	FBXO34	F-box protein 34
hsa-miR-1324	1	0	1	1	1	1	ARGLU1	arginine and glutamate rich 1
hsa-miR-1324	1	0	1	1	1	1	FIGN	fidgetin
hsa-miR-1324	1	0	1	1	1	1	FAM178A	family with sequence similarity 178, member A
hsa-miR-1324	1	0	1	1	1	1	TMEM33	transmembrane protein 33
hsa-miR-1324	0	0	1	1	1	1	TSR1	TSR1, 20S rRNA accumulation, homolog (S. cerevisiae)
hsa-miR-1324	0	0	1	1	1	1	MRPS10	mitochondrial ribosomal protein S10
hsa-miR-1324	0	0	1	0	1	1	GOLPH3L	golgi phosphoprotein 3-like
hsa-miR-1324	1	0	1	0	1	1	ARL8B	ADP-ribosylation factor-like 8B
hsa-miR-1324	1	0	1	1	1	1	TBC1D13	TBC1 domain family, member 13
hsa-miR-1324	0	0	1	1	1	1	SLC47A1	solute carrier family 47, member 1
hsa-miR-1324	1	0	1	0	1	1	SEPT11	septin 11
hsa-miR-1324	0	0	1	1	1	1	C1orf106	chromosome 1 open reading frame 106
hsa-miR-1324	1	0	1	1	1	1	ZNF654	zinc finger protein 654
hsa-miR-1324	0	0	1	1	1	1	SAYSD1	SAYSVFN motif domain containing 1
hsa-miR-1324	1	0	1	1	1	1	C9orf72	chromosome 9 open reading frame 72
hsa-miR-1324	0	0	1	1	1	1	GIMAP4	GTPase, IMAP family member 4
hsa-miR-1324	1	0	1	1	1	1	KIAA1598	KIAA1598
hsa-miR-1324	1	0	1	0	1	1	TMEM106B	transmembrane protein 106B
hsa-miR-1324	0	0	1	1	0	0	IL26	interleukin 26
hsa-miR-1324	0	0	1	1	1	1	STYK1	serine/threonine/tyrosine kinase 1
hsa-miR-1324	0	0	1	1	1	1	CISD1	CDGSH iron sulfur domain 1
hsa-miR-1324	1	0	1	1	1	1	ASH1L	ash1 (absent, small, or homeotic)-like (Drosophila)
hsa-miR-1324	1	0	1	1	1	1	ETNK1	ethanolamine kinase 1
hsa-miR-1324	1	0	1	0	1	1	SMPD3	sphingomyelin phosphodiesterase 3, neutral membrane (neutral sphingomyelinase II)
hsa-miR-1324	0	0	1	1	1	1	ELAC1	elaC homolog 1 (E. coli)
hsa-miR-1324	1	0	1	0	1	1	TMEM55A	transmembrane protein 55A
hsa-miR-1324	1	0	1	0	1	1	MAML3	mastermind-like 3 (Drosophila)
hsa-miR-1324	1	0	1	1	1	1	CDCA7L	cell division cycle associated 7-like
hsa-miR-1324	1	0	1	1	1	1	GNG12	guanine nucleotide binding protein (G protein), gamma 12
hsa-miR-1324	1	0	1	0	1	1	TMX3	thioredoxin-related transmembrane protein 3
hsa-miR-1324	0	0	1	1	0	0	TOMM7	translocase of outer mitochondrial membrane 7 homolog (yeast)
hsa-miR-1324	1	0	1	1	1	1	DLL4	delta-like 4 (Drosophila)
hsa-miR-1324	0	0	1	1	1	1	TRMT13	tRNA methyltransferase 13 homolog (S. cerevisiae)
hsa-miR-1324	0	0	1	0	1	1	ARL15	ADP-ribosylation factor-like 15
hsa-miR-1324	1	0	1	1	1	1	HOXA5	homeobox A5
hsa-miR-1324	1	0	1	1	1	1	SEPT3	septin 3
hsa-miR-1324	1	0	1	0	1	1	UBFD1	ubiquitin family domain containing 1
hsa-miR-1324	0	0	1	1	1	1	KLHL4	kelch-like 4 (Drosophila)
hsa-miR-1324	1	0	1	1	1	1	POLE4	polymerase (DNA-directed), epsilon 4, accessory subunit
hsa-miR-1324	1	0	1	0	1	1	TM9SF3	transmembrane 9 superfamily member 3
hsa-miR-1324	0	0	1	1	1	1	GRIPAP1	GRIP1 associated protein 1
hsa-miR-1324	0	0	1	1	1	1	TMEM167B	transmembrane protein 167B
hsa-miR-1324	0	0	1	1	1	1	CMC2	COX assembly mitochondrial protein 2 homolog (S. cerevisiae)
hsa-miR-1324	0	0	1	1	1	1	PRTFDC1	phosphoribosyl transferase domain containing 1
hsa-miR-1324	1	0	1	0	1	1	MNT	MAX binding protein
hsa-miR-1324	1	0	1	1	1	1	ANKRD50	ankyrin repeat domain 50
hsa-miR-1324	1	0	1	0	1	1	SLC17A6	solute carrier family 17 (sodium-dependent inorganic phosphate cotransporter), member 6
hsa-miR-1324	0	0	1	1	1	1	PDSS2	prenyl (decaprenyl) diphosphate synthase, subunit 2
hsa-miR-1324	1	0	1	1	1	1	PCDH9	protocadherin 9
hsa-miR-1324	0	0	1	1	1	1	PLXDC1	plexin domain containing 1
hsa-miR-1324	0	0	1	1	0	0	LYRM4	LYR motif containing 4
hsa-miR-1324	1	0	1	1	1	1	ATP8B2	ATPase, aminophospholipid transporter, class I, type 8B, member 2
hsa-miR-1324	1	0	1	1	1	1	NRIP3	nuclear receptor interacting protein 3
hsa-miR-1324	0	0	1	1	1	1	S100A14	S100 calcium binding protein A14
hsa-miR-1324	1	0	1	1	1	1	RAB22A	RAB22A, member RAS oncogene family
hsa-miR-1324	1	0	1	1	1	1	SLC24A3	solute carrier family 24 (sodium/potassium/calcium exchanger), member 3
hsa-miR-1324	1	0	1	0	1	1	FAM40B	family with sequence similarity 40, member B
hsa-miR-1324	0	0	1	1	1	1	SHROOM4	shroom family member 4
hsa-miR-1324	1	0	1	1	1	1	USP31	ubiquitin specific peptidase 31
hsa-miR-1324	1	0	1	1	1	1	DLG3	discs, large homolog 3 (Drosophila)
hsa-miR-1324	1	0	1	1	1	1	CASKIN1	CASK interacting protein 1
hsa-miR-1324	1	0	1	0	1	1	NUFIP2	nuclear fragile X mental retardation protein interacting protein 2
hsa-miR-1324	1	0	1	1	1	1	MIB1	mindbomb E3 ubiquitin protein ligase 1
hsa-miR-1324	1	0	1	0	1	1	ZNF398	zinc finger protein 398
hsa-miR-1324	1	0	1	0	1	1	SYT4	synaptotagmin IV
hsa-miR-1324	0	0	1	1	1	1	TXNDC16	thioredoxin domain containing 16
hsa-miR-1324	1	0	1	1	1	1	NLGN2	neuroligin 2
hsa-miR-1324	1	0	1	1	1	1	SEMA6A	sema domain, transmembrane domain (TM), and cytoplasmic domain, (semaphorin) 6A
hsa-miR-1324	0	0	1	0	1	1	TRMT5	tRNA methyltransferase 5 homolog (S. cerevisiae)
hsa-miR-1324	1	0	1	1	1	1	HOMEZ	homeobox and leucine zipper encoding
hsa-miR-1324	1	0	1	0	1	1	KIAA1456	KIAA1456
hsa-miR-1324	1	0	1	1	1	1	RANBP10	RAN binding protein 10
hsa-miR-1324	1	0	1	0	1	1	SH3RF1	SH3 domain containing ring finger 1
hsa-miR-1324	1	0	1	1	1	1	VAT1L	vesicle amine transport protein 1 homolog (T. californica)-like
hsa-miR-1324	0	0	1	1	1	1	PRX	periaxin
hsa-miR-1324	1	0	1	0	1	1	RAP2A	RAP2A, member of RAS oncogene family
hsa-miR-1324	0	0	1	1	0	0	DHH	desert hedgehog
hsa-miR-1324	1	0	1	1	1	1	HCN1	hyperpolarization activated cyclic nucleotide-gated potassium channel 1
hsa-miR-1324	1	0	1	0	1	1	NMT1	N-myristoyltransferase 1
hsa-miR-1324	1	0	1	1	1	1	MTMR3	myotubularin related protein 3
hsa-miR-1324	1	0	1	1	1	1	CLDN1	claudin 1
hsa-miR-1324	0	0	1	1	1	1	RNASEL	ribonuclease L (2',5'-oligoisoadenylate synthetase-dependent)
hsa-miR-1324	1	0	1	0	1	1	TMX4	thioredoxin-related transmembrane protein 4
hsa-miR-1324	0	0	1	0	1	1	SLC30A1	solute carrier family 30 (zinc transporter), member 1
hsa-miR-1324	0	0	1	0	1	1	MS4A7	membrane-spanning 4-domains, subfamily A, member 7
hsa-miR-1324	1	0	1	1	1	1	RPRD1B	regulation of nuclear pre-mRNA domain containing 1B
hsa-miR-1324	1	0	1	1	1	1	PELI2	pellino E3 ubiquitin protein ligase family member 2
hsa-miR-1324	1	0	1	1	1	1	ZFYVE1	zinc finger, FYVE domain containing 1
hsa-miR-1324	0	0	1	1	1	1	CHST6	carbohydrate (N-acetylglucosamine 6-O) sulfotransferase 6
hsa-miR-1324	1	0	1	1	1	1	SENP2	SUMO1/sentrin/SMT3 specific peptidase 2
hsa-miR-1324	0	0	1	1	1	1	MS4A1	membrane-spanning 4-domains, subfamily A, member 1
hsa-miR-1324	1	0	1	1	1	1	PPP1R11	protein phosphatase 1, regulatory (inhibitor) subunit 11
hsa-miR-1324	1	0	1	0	1	1	MCL1	myeloid cell leukemia sequence 1 (BCL2-related)
hsa-miR-1324	0	0	1	1	1	1	PGM5	phosphoglucomutase 5
hsa-miR-1324	1	0	1	1	1	1	SLC22A3	solute carrier family 22 (extraneuronal monoamine transporter), member 3
hsa-miR-1324	1	0	1	0	1	1	GAN	gigaxonin
hsa-miR-1324	1	0	1	0	1	1	CSNK1G1	casein kinase 1, gamma 1
hsa-miR-1324	0	0	1	1	0	0	ABHD4	abhydrolase domain containing 4
hsa-miR-1324	0	0	1	1	1	1	CHP2	calcineurin-like EF hand protein 2
hsa-miR-1324	1	0	1	1	1	1	CLSTN2	calsyntenin 2
hsa-miR-1324	1	0	1	1	1	1	XYLT1	xylosyltransferase I
hsa-miR-1324	1	0	1	1	1	1	ABCG4	ATP-binding cassette, sub-family G (WHITE), member 4
hsa-miR-1324	0	0	1	1	1	1	GLIPR2	GLI pathogenesis-related 2
hsa-miR-1324	0	0	1	1	1	1	HS1BP3	HCLS1 binding protein 3
hsa-miR-1324	1	0	1	1	1	1	HIF3A	hypoxia inducible factor 3, alpha subunit
hsa-miR-1324	0	0	1	1	1	1	HHIP	hedgehog interacting protein
hsa-miR-1324	1	0	1	1	1	1	TMEM168	transmembrane protein 168
hsa-miR-1324	1	0	1	1	1	1	GIGYF1	GRB10 interacting GYF protein 1
hsa-miR-1324	1	0	1	0	1	1	HOXC8	homeobox C8
hsa-miR-1324	1	0	1	1	1	1	PRRX1	paired related homeobox 1
hsa-miR-1324	1	0	1	0	1	1	ELOVL4	ELOVL fatty acid elongase 4
hsa-miR-1324	1	0	1	1	1	1	C6orf106	chromosome 6 open reading frame 106
hsa-miR-1324	1	0	1	1	1	1	PER2	period homolog 2 (Drosophila)
hsa-miR-1324	1	0	1	1	1	1	MARCH7	membrane-associated ring finger (C3HC4) 7, E3 ubiquitin protein ligase
hsa-miR-1324	0	0	1	1	1	1	METTL4	methyltransferase like 4
hsa-miR-1324	0	0	1	1	1	1	SMN2	survival of motor neuron 2, centromeric
hsa-miR-1324	1	0	1	1	0	0	CCDC71	coiled-coil domain containing 71
hsa-miR-1324	1	0	1	1	1	1	REEP1	receptor accessory protein 1
hsa-miR-1324	1	0	1	1	1	1	SOWAHC	sosondowah ankyrin repeat domain family member C
hsa-miR-1324	1	0	1	1	0	0	UBE2Z	ubiquitin-conjugating enzyme E2Z
hsa-miR-1324	1	0	1	1	1	1	GRAMD3	GRAM domain containing 3
hsa-miR-1324	0	0	1	1	1	1	HTR5A	5-hydroxytryptamine (serotonin) receptor 5A, G protein-coupled
hsa-miR-1324	1	0	1	1	1	1	NEUROG2	neurogenin 2
hsa-miR-1324	0	0	1	1	0	0	C7orf25	chromosome 7 open reading frame 25
hsa-miR-1324	1	0	1	1	0	0	PHF23	PHD finger protein 23
hsa-miR-1324	1	0	1	0	1	1	NOTCH2	notch 2
hsa-miR-1324	1	0	1	1	1	1	LRRC2	leucine rich repeat containing 2
hsa-miR-1324	1	0	1	1	1	1	ZNF329	zinc finger protein 329
hsa-miR-1324	0	0	1	1	1	1	STEAP4	STEAP family member 4
hsa-miR-1324	1	0	1	0	1	1	ZFHX4	zinc finger homeobox 4
hsa-miR-1324	1	0	1	1	1	1	CLMP	CXADR-like membrane protein
hsa-miR-1324	0	0	1	1	1	1	SNX22	sorting nexin 22
hsa-miR-1324	1	0	1	1	1	1	GRHL2	grainyhead-like 2 (Drosophila)
hsa-miR-1324	0	0	1	1	1	1	ARL14	ADP-ribosylation factor-like 14
hsa-miR-1324	0	0	1	1	1	1	GPR110	G protein-coupled receptor 110
hsa-miR-1324	1	0	1	0	1	1	VCPIP1	valosin containing protein (p97)/p47 complex interacting protein 1
hsa-miR-1324	1	0	1	1	1	1	ZC3H12A	zinc finger CCCH-type containing 12A
hsa-miR-1324	1	0	1	1	1	1	HKDC1	hexokinase domain containing 1
hsa-miR-1324	0	0	1	1	1	1	COQ10B	coenzyme Q10 homolog B (S. cerevisiae)
hsa-miR-1324	0	0	1	1	1	1	ACSF2	acyl-CoA synthetase family member 2
hsa-miR-1324	1	0	1	1	1	1	NUBPL	nucleotide binding protein-like
hsa-miR-1324	1	0	1	1	1	1	SLC35F5	solute carrier family 35, member F5
hsa-miR-1324	1	0	1	1	1	1	TRIB1	tribbles homolog 1 (Drosophila)
hsa-miR-1324	0	0	1	0	1	1	PDGFD	platelet derived growth factor D
hsa-miR-1324	1	0	1	1	1	1	TNKS2	tankyrase, TRF1-interacting ankyrin-related ADP-ribose polymerase 2
hsa-miR-1324	1	0	1	0	1	1	SETD7	SET domain containing (lysine methyltransferase) 7
hsa-miR-1324	1	0	1	1	1	1	PTPRO	protein tyrosine phosphatase, receptor type, O
hsa-miR-1324	1	0	1	1	1	1	TMX1	thioredoxin-related transmembrane protein 1
hsa-miR-1324	1	0	1	1	1	1	NRBF2	nuclear receptor binding factor 2
hsa-miR-1324	0	0	1	1	1	1	BCL2L14	BCL2-like 14 (apoptosis facilitator)
hsa-miR-1324	1	0	1	0	1	1	C1orf21	chromosome 1 open reading frame 21
hsa-miR-1324	1	0	1	1	1	1	PDRG1	p53 and DNA-damage regulated 1
hsa-miR-1324	1	0	1	1	0	0	PVRL4	poliovirus receptor-related 4
hsa-miR-1324	1	0	1	1	1	1	SNX27	sorting nexin family member 27
hsa-miR-1324	1	0	1	1	1	1	VMP1	vacuole membrane protein 1
hsa-miR-1324	1	0	1	1	1	1	PPP1R14C	protein phosphatase 1, regulatory (inhibitor) subunit 14C
hsa-miR-1324	1	0	1	0	1	1	SPRY4	sprouty homolog 4 (Drosophila)
hsa-miR-1324	0	0	1	1	1	1	ARPC5L	actin related protein 2/3 complex, subunit 5-like
hsa-miR-1324	0	0	1	1	1	1	TEX15	testis expressed 15
hsa-miR-1324	1	0	1	0	1	1	TMEM47	transmembrane protein 47
hsa-miR-1324	0	0	1	1	1	1	KCNA7	potassium voltage-gated channel, shaker-related subfamily, member 7
hsa-miR-1324	0	0	1	0	1	1	ENAM	enamelin
hsa-miR-1324	1	0	1	0	1	1	SRSF8	serine/arginine-rich splicing factor 8
hsa-miR-1324	0	0	1	1	1	1	MAGT1	magnesium transporter 1
hsa-miR-1324	0	0	1	0	1	1	RAB6C	RAB6C, member RAS oncogene family
hsa-miR-1324	1	0	1	1	1	1	FBXO30	F-box protein 30
hsa-miR-1324	1	0	1	1	1	1	DSEL	dermatan sulfate epimerase-like
hsa-miR-1324	1	0	1	1	1	1	FAM175B	family with sequence similarity 175, member B
hsa-miR-1324	1	0	1	0	1	1	ATP11A	ATPase, class VI, type 11A
hsa-miR-1324	1	0	1	1	1	1	ARID5B	AT rich interactive domain 5B (MRF1-like)
hsa-miR-1324	1	0	1	0	1	1	FAR1	fatty acyl CoA reductase 1
hsa-miR-1324	0	0	1	1	1	1	ATP13A4	ATPase type 13A4
hsa-miR-1324	1	0	1	1	1	1	ZDHHC18	zinc finger, DHHC-type containing 18
hsa-miR-1324	0	0	1	0	1	1	LDOC1L	leucine zipper, down-regulated in cancer 1-like
hsa-miR-1324	1	0	1	1	1	1	POLDIP3	polymerase (DNA-directed), delta interacting protein 3
hsa-miR-1324	0	0	1	1	1	1	YIPF4	Yip1 domain family, member 4
hsa-miR-1324	0	0	1	1	0	0	NICN1	nicolin 1
hsa-miR-1324	0	0	1	0	1	1	MIEN1	migration and invasion enhancer 1
hsa-miR-1324	0	0	1	1	0	0	CHCHD6	coiled-coil-helix-coiled-coil-helix domain containing 6
hsa-miR-1324	0	0	1	1	1	1	VPS25	vacuolar protein sorting 25 homolog (S. cerevisiae)
hsa-miR-1324	1	0	1	1	1	1	SYVN1	synovial apoptosis inhibitor 1, synoviolin
hsa-miR-1324	0	0	1	1	1	1	MAP1LC3A	microtubule-associated protein 1 light chain 3 alpha
hsa-miR-1324	1	0	1	0	1	1	GLYR1	glyoxylate reductase 1 homolog (Arabidopsis)
hsa-miR-1324	0	0	1	1	1	1	INSM2	insulinoma-associated 2
hsa-miR-1324	0	0	1	1	1	1	MGARP	mitochondria-localized glutamic acid-rich protein
hsa-miR-1324	1	0	1	1	0	0	ZC3H10	zinc finger CCCH-type containing 10
hsa-miR-1324	1	0	1	1	1	1	ARHGEF39	Rho guanine nucleotide exchange factor (GEF) 39
hsa-miR-1324	1	0	1	1	1	1	SLC35B4	solute carrier family 35, member B4
hsa-miR-1324	1	0	1	1	1	1	FAM104A	family with sequence similarity 104, member A
hsa-miR-1324	1	0	1	1	1	1	ABHD13	abhydrolase domain containing 13
hsa-miR-1324	0	0	1	1	1	1	FBXL20	F-box and leucine-rich repeat protein 20
hsa-miR-1324	1	0	1	1	1	1	ARHGAP19	Rho GTPase activating protein 19
hsa-miR-1324	1	0	1	0	1	1	C5orf62	chromosome 5 open reading frame 62
hsa-miR-1324	1	0	1	1	1	1	TRIM55	tripartite motif containing 55
hsa-miR-1324	1	0	1	1	1	1	C5orf30	chromosome 5 open reading frame 30
hsa-miR-1324	1	0	1	0	1	1	PURB	purine-rich element binding protein B
hsa-miR-1324	1	0	1	1	0	0	CAMK2N2	calcium/calmodulin-dependent protein kinase II inhibitor 2
hsa-miR-1324	1	0	1	1	1	1	FOXQ1	forkhead box Q1
hsa-miR-1324	0	0	1	0	1	1	C9orf123	chromosome 9 open reading frame 123
hsa-miR-1324	1	0	1	1	0	0	FCHSD1	FCH and double SH3 domains 1
hsa-miR-1324	1	0	1	1	1	1	EPT1	ethanolaminephosphotransferase 1 (CDP-ethanolamine-specific)
hsa-miR-1324	1	0	1	1	0	0	DISP2	dispatched homolog 2 (Drosophila)
hsa-miR-1324	1	0	1	1	1	1	TSPYL5	TSPY-like 5
hsa-miR-1324	1	0	1	1	0	0	CCDC120	coiled-coil domain containing 120
hsa-miR-1324	1	0	1	1	1	1	LUZP1	leucine zipper protein 1
hsa-miR-1324	1	0	1	1	1	1	CDC42	cell division cycle 42 (GTP binding protein, 25kDa)
hsa-miR-1324	1	0	1	1	1	1	SLC18B1	solute carrier family 18, subfamily B, member 1
hsa-miR-1324	0	0	1	1	1	1	ZNF830	zinc finger protein 830
hsa-miR-1324	1	0	1	1	1	1	RCSD1	RCSD domain containing 1
hsa-miR-1324	0	0	1	1	1	1	NALCN	sodium leak channel, non-selective
hsa-miR-1324	1	0	1	1	1	1	ELFN2	extracellular leucine-rich repeat and fibronectin type III domain containing 2
hsa-miR-1324	1	0	1	1	0	0	BRD4	bromodomain containing 4
hsa-miR-1324	0	0	1	1	1	1	CDKN2B	cyclin-dependent kinase inhibitor 2B (p15, inhibits CDK4)
hsa-miR-1324	0	0	1	1	1	1	ABCA9	ATP-binding cassette, sub-family A (ABC1), member 9
hsa-miR-1324	1	0	1	1	1	1	PTP4A2	protein tyrosine phosphatase type IVA, member 2
hsa-miR-1324	1	0	1	1	1	1	C20orf112	chromosome 20 open reading frame 112
hsa-miR-1324	0	0	1	1	1	1	CBLN4	cerebellin 4 precursor
hsa-miR-1324	0	0	1	1	1	1	CDKN2AIPNL	CDKN2A interacting protein N-terminal like
hsa-miR-1324	1	0	1	1	1	1	COL11A2	collagen, type XI, alpha 2
hsa-miR-1324	1	0	1	0	1	1	EDARADD	EDAR-associated death domain
hsa-miR-1324	1	0	1	1	1	1	ZNF280B	zinc finger protein 280B
hsa-miR-1324	0	0	1	1	0	0	CITED4	Cbp/p300-interacting transactivator, with Glu/Asp-rich carboxy-terminal domain, 4
hsa-miR-1324	0	0	1	0	1	1	SYNPO2	synaptopodin 2
hsa-miR-1324	0	0	1	1	1	1	RAD51B	RAD51 homolog B (S. cerevisiae)
hsa-miR-1324	0	0	1	1	1	1	PKD1L1	polycystic kidney disease 1 like 1
hsa-miR-1324	1	0	1	1	0	0	PYGO2	pygopus homolog 2 (Drosophila)
hsa-miR-1324	1	0	1	1	1	1	PANK1	pantothenate kinase 1
hsa-miR-1324	1	0	1	1	1	1	PCSK6	proprotein convertase subtilisin/kexin type 6
hsa-miR-1324	0	0	1	1	0	0	MAGEE2	melanoma antigen family E, 2
hsa-miR-1324	1	0	1	1	1	1	CD200R1	CD200 receptor 1
hsa-miR-1324	1	0	1	1	1	1	DNER	delta/notch-like EGF repeat containing
hsa-miR-1324	0	0	1	1	0	0	RNF133	ring finger protein 133
hsa-miR-1324	1	0	1	0	1	1	CNOT6L	CCR4-NOT transcription complex, subunit 6-like
hsa-miR-1324	1	0	1	1	1	1	MAPK1IP1L	mitogen-activated protein kinase 1 interacting protein 1-like
hsa-miR-1324	0	0	1	1	1	1	SGK494	uncharacterized serine/threonine-protein kinase SgK494
hsa-miR-1324	1	0	1	1	1	1	FAM76B	family with sequence similarity 76, member B
hsa-miR-1324	0	0	1	1	0	0	LINC00477	long intergenic non-protein coding RNA 477
hsa-miR-1324	1	0	1	1	1	1	ZMAT2	zinc finger, matrin-type 2
hsa-miR-1324	0	0	1	1	1	1	ZFC3H1	zinc finger, C3H1-type containing
hsa-miR-1324	0	0	1	1	1	1	VWA3B	von Willebrand factor A domain containing 3B
hsa-miR-1324	0	0	1	1	1	1	TMEM106A	transmembrane protein 106A
hsa-miR-1324	1	0	1	1	1	1	MAX	MYC associated factor X
hsa-miR-1324	1	0	1	0	1	1	ZBTB47	zinc finger and BTB domain containing 47
hsa-miR-1324	0	0	1	0	1	1	PIGM	phosphatidylinositol glycan anchor biosynthesis, class M
hsa-miR-1324	1	0	1	0	1	1	DIRAS1	DIRAS family, GTP-binding RAS-like 1
hsa-miR-1324	0	0	1	1	0	0	CSNK1A1L	casein kinase 1, alpha 1-like
hsa-miR-1324	0	0	1	1	1	1	FAM100A	family with sequence similarity 100, member A
hsa-miR-1324	0	0	1	0	1	1	SPATA18	spermatogenesis associated 18
hsa-miR-1324	0	0	1	1	0	0	TMEM217	transmembrane protein 217
hsa-miR-1324	1	0	1	0	1	1	MTPN	myotrophin
hsa-miR-1324	0	0	1	0	1	1	CHKB	choline kinase beta
hsa-miR-1324	0	0	1	1	1	1	CHMP4C	charged multivesicular body protein 4C
hsa-miR-1324	1	0	1	1	1	1	POGLUT1	protein O-glucosyltransferase 1
hsa-miR-1324	0	0	1	1	1	1	RMI2	RMI2, RecQ mediated genome instability 2, homolog (S. cerevisiae)
hsa-miR-1324	0	0	1	1	0	0	NXPE1	neurexophilin and PC-esterase domain family, member 1
hsa-miR-1324	1	0	1	0	1	1	UBXN10	UBX domain protein 10
hsa-miR-1324	1	0	1	1	1	1	TBX15	T-box 15
hsa-miR-1324	1	0	1	1	1	1	FAM123B	family with sequence similarity 123B
hsa-miR-1324	1	0	1	1	1	1	SPRED1	sprouty-related, EVH1 domain containing 1
hsa-miR-1324	1	0	1	1	0	0	ZNF579	zinc finger protein 579
hsa-miR-1324	0	0	1	1	1	1	RALGPS2	Ral GEF with PH domain and SH3 binding motif 2
hsa-miR-1324	1	0	1	1	1	1	NXPH1	neurexophilin 1
hsa-miR-1324	1	0	1	1	1	1	PDIK1L	PDLIM1 interacting kinase 1 like
hsa-miR-1324	1	0	1	0	1	1	N4BP1	NEDD4 binding protein 1
hsa-miR-1324	1	0	1	1	1	1	TCEANC2	transcription elongation factor A (SII) N-terminal and central domain containing 2
hsa-miR-1324	1	0	1	1	1	1	TXLNB	taxilin beta
hsa-miR-1324	1	0	1	0	1	1	ENPP6	ectonucleotide pyrophosphatase/phosphodiesterase 6
hsa-miR-1324	1	0	1	1	0	0	TMEM86A	transmembrane protein 86A
hsa-miR-1324	1	0	1	1	0	0	SVEP1	sushi, von Willebrand factor type A, EGF and pentraxin domain containing 1
hsa-miR-1324	1	0	1	0	1	1	ZCCHC24	zinc finger, CCHC domain containing 24
hsa-miR-1324	1	0	1	0	1	1	MDGA1	MAM domain containing glycosylphosphatidylinositol anchor 1
hsa-miR-1324	1	0	1	1	1	1	CREBRF	CREB3 regulatory factor
hsa-miR-1324	1	0	1	1	1	1	C2orf69	chromosome 2 open reading frame 69
hsa-miR-1324	1	0	1	1	0	0	FAM43A	family with sequence similarity 43, member A
hsa-miR-1324	1	0	1	1	1	1	FNDC5	fibronectin type III domain containing 5
hsa-miR-1324	0	0	1	1	1	1	CREG2	cellular repressor of E1A-stimulated genes 2
hsa-miR-1324	0	0	1	1	1	1	CDY1	chromodomain protein, Y-linked, 1
hsa-miR-1324	1	0	1	1	1	1	RAB39B	RAB39B, member RAS oncogene family
hsa-miR-1324	1	0	1	1	1	1	RC3H1	ring finger and CCCH-type domains 1
hsa-miR-1324	1	0	1	0	1	1	KLHDC1	kelch domain containing 1
hsa-miR-1324	0	0	1	1	1	1	TAPBP	TAP binding protein (tapasin)
hsa-miR-1324	0	0	1	0	1	1	CTAGE1	cutaneous T-cell lymphoma-associated antigen 1
hsa-miR-1324	0	0	1	0	1	1	TUSC5	tumor suppressor candidate 5
hsa-miR-1324	0	0	1	1	1	1	KCNH5	potassium voltage-gated channel, subfamily H (eag-related), member 5
hsa-miR-1324	1	0	1	1	1	1	MMGT1	membrane magnesium transporter 1
hsa-miR-1324	1	0	1	1	1	1	CCDC117	coiled-coil domain containing 117
hsa-miR-1324	1	0	1	0	1	1	PGM2L1	phosphoglucomutase 2-like 1
hsa-miR-1324	1	0	1	0	1	1	KSR2	kinase suppressor of ras 2
hsa-miR-1324	0	0	1	0	1	1	NBPF15	neuroblastoma breakpoint family, member 15
hsa-miR-1324	1	0	1	1	1	1	XKR6	XK, Kell blood group complex subunit-related family, member 6
hsa-miR-1324	0	0	1	1	1	1	NSMCE2	non-SMC element 2, MMS21 homolog (S. cerevisiae)
hsa-miR-1324	1	0	1	1	1	1	RABL3	RAB, member of RAS oncogene family-like 3
hsa-miR-1324	1	0	1	0	1	1	SREK1IP1	SREK1-interacting protein 1
hsa-miR-1324	1	0	1	1	1	1	SLC41A1	solute carrier family 41, member 1
hsa-miR-1324	0	0	1	1	1	1	C14orf79	chromosome 14 open reading frame 79
hsa-miR-1324	1	0	1	1	1	1	LDLRAD3	low density lipoprotein receptor class A domain containing 3
hsa-miR-1324	1	0	1	1	1	1	UBR1	ubiquitin protein ligase E3 component n-recognin 1
hsa-miR-1324	0	0	1	1	1	1	ZDHHC22	zinc finger, DHHC-type containing 22
hsa-miR-1324	1	0	1	1	1	1	SYT9	synaptotagmin IX
hsa-miR-1324	0	0	1	1	0	0	KLB	klotho beta
hsa-miR-1324	1	0	1	1	1	1	OLIG3	oligodendrocyte transcription factor 3
hsa-miR-1324	0	0	1	1	1	1	CHSY3	chondroitin sulfate synthase 3
hsa-miR-1324	1	0	1	1	1	1	EXOC8	exocyst complex component 8
hsa-miR-1324	1	0	1	1	1	1	ZADH2	zinc binding alcohol dehydrogenase domain containing 2
hsa-miR-1324	1	0	1	1	1	1	PDLIM2	PDZ and LIM domain 2 (mystique)
hsa-miR-1324	1	0	1	1	1	1	STX12	syntaxin 12
hsa-miR-1324	0	0	1	1	1	1	ZNF831	zinc finger protein 831
hsa-miR-1324	0	0	1	1	1	1	SIRPD	signal-regulatory protein delta
hsa-miR-1324	0	0	1	1	1	1	SLC9C2	solute carrier family 9, member C2 (putative)
hsa-miR-1324	0	0	1	1	1	1	TFAP2E	transcription factor AP-2 epsilon (activating enhancer binding protein 2 epsilon)
hsa-miR-1324	1	0	1	0	1	1	RTN4RL1	reticulon 4 receptor-like 1
hsa-miR-1324	1	0	1	0	1	1	ARL5B	ADP-ribosylation factor-like 5B
hsa-miR-1324	0	0	1	0	1	1	ZNF445	zinc finger protein 445
hsa-miR-1324	0	0	1	1	1	1	CCDC67	coiled-coil domain containing 67
hsa-miR-1324	0	0	1	0	1	1	HCG27	HLA complex group 27 (non-protein coding)
hsa-miR-1324	1	0	1	0	1	1	EFHA2	EF-hand domain family, member A2
hsa-miR-1324	0	0	1	1	1	1	TMTC3	transmembrane and tetratricopeptide repeat containing 3
hsa-miR-1324	1	0	1	1	1	1	NF2	neurofibromin 2 (merlin)
hsa-miR-1324	1	0	1	1	1	1	BCL6B	B-cell CLL/lymphoma 6, member B
hsa-miR-1324	0	0	1	1	1	1	USP12	ubiquitin specific peptidase 12
hsa-miR-1324	1	0	1	1	1	1	ADAT2	adenosine deaminase, tRNA-specific 2
hsa-miR-1324	1	0	1	1	1	1	ISM2	isthmin 2 homolog (zebrafish)
hsa-miR-1324	1	0	1	1	1	1	TMEM229B	transmembrane protein 229B
hsa-miR-1324	1	0	1	1	1	1	BCL9L	B-cell CLL/lymphoma 9-like
hsa-miR-1324	0	0	1	1	1	1	C7orf53	chromosome 7 open reading frame 53
hsa-miR-1324	1	0	1	0	1	1	RIMS4	regulating synaptic membrane exocytosis 4
hsa-miR-1324	1	0	1	0	1	1	TMSB4XP8	thymosin beta 4, X-linked pseudogene 8
hsa-miR-1324	0	0	1	0	1	1	NBPF11	neuroblastoma breakpoint family, member 11
hsa-miR-1324	1	0	1	0	1	1	SRRM4	serine/arginine repetitive matrix 4
hsa-miR-1324	0	0	1	1	1	1	CLEC7A	C-type lectin domain family 7, member A
hsa-miR-1324	0	0	1	0	1	1	BTNL3	butyrophilin-like 3
hsa-miR-1324	1	0	1	1	1	1	AQP1	aquaporin 1 (Colton blood group)
hsa-miR-1324	1	0	1	0	1	1	PTPLB	protein tyrosine phosphatase-like (proline instead of catalytic arginine), member b
hsa-miR-1324	1	0	1	1	1	1	RAB43	RAB43, member RAS oncogene family
hsa-miR-1324	0	0	1	0	0	0	IGFL1	IGF-like family member 1
hsa-miR-1324	0	0	1	1	1	1	LHFPL4	lipoma HMGIC fusion partner-like 4
hsa-miR-1324	1	0	1	0	1	1	ZC3H6	zinc finger CCCH-type containing 6
hsa-miR-1324	1	0	1	1	1	1	PTGER3	prostaglandin E receptor 3 (subtype EP3)
hsa-miR-1324	0	0	1	1	1	1	PTHLH	parathyroid hormone-like hormone
hsa-miR-1324	0	0	1	0	1	1	WASH3P	WAS protein family homolog 3 pseudogene
hsa-miR-1324	0	0	1	1	1	1	COL18A1-AS1	COL18A1 antisense RNA 1
hsa-miR-1324	1	0	1	1	1	1	ADAMTS18	ADAM metallopeptidase with thrombospondin type 1 motif, 18
hsa-miR-1324	1	0	1	1	0	0	KAZN	kazrin, periplakin interacting protein
hsa-miR-1324	0	0	1	1	1	1	SHC4	SHC (Src homology 2 domain containing) family, member 4
hsa-miR-1324	1	0	1	0	1	1	CAPRIN1	cell cycle associated protein 1
hsa-miR-1324	1	0	1	0	1	1	LURAP1L	leucine rich adaptor protein 1-like
hsa-miR-1324	1	0	1	0	1	1	MBLAC2	metallo-beta-lactamase domain containing 2
hsa-miR-1324	0	0	1	1	1	1	APOBEC4	apolipoprotein B mRNA editing enzyme, catalytic polypeptide-like 4 (putative)
hsa-miR-1324	1	0	1	1	1	1	MOG	myelin oligodendrocyte glycoprotein
hsa-miR-1324	1	0	1	1	1	1	ENSA	endosulfine alpha
hsa-miR-1324	1	0	1	1	1	1	GADL1	glutamate decarboxylase-like 1
hsa-miR-1324	0	0	1	1	0	0	KIAA1211L	KIAA1211-like
hsa-miR-1324	0	0	1	0	1	1	FLJ44635	TPT1-like protein
hsa-miR-1324	0	0	1	1	0	0	AMTN	amelotin
hsa-miR-1324	0	0	1	0	1	1	TMEM215	transmembrane protein 215
hsa-miR-1324	0	0	1	0	0	0	ESRRAP2	estrogen-related receptor alpha pseudogene 2
hsa-miR-1324	0	0	1	0	0	0	TFAMP1	transcription factor A, mitochondrial pseudogene 1
hsa-miR-1324	0	0	1	0	0	0	SNORD107	small nucleolar RNA, C/D box 107
hsa-miR-1324	0	0	1	1	0	0	SNRPN	small nuclear ribonucleoprotein polypeptide N
hsa-miR-1324	0	0	1	0	0	0	LYPLA2P1	lysophospholipase II pseudogene 1
hsa-miR-1324	0	0	1	0	0	0	MIR155HG	MIR155 host gene (non-protein coding)
[truncated: 37 more rows]
