# Supplementary material for: Profiling of Selected MicroRNAs in Proliferative Eutopic Endometrium of Women with Ovarian Endometriosis
Source: Biomed Res Int. 2015 Aug 20;2015:760698. doi: 10.1155/2015/760698 (PMC4558423; doi:10.1155/2015/760698)
Supplement: Supplementary file 1 — Table I: The names of miRNAs significantly differentially expressed between eutopic endometrium of patients with endometriosis vs eutopic endometrium of patients without endometriosis. Table II: The associations between miRNA and mRNA, which presents detailed results of the search of six major databases i.e targetscan, tarbase, miranda, mirbase, mirtarget2 and pictar. [file 760698.f1.zip › 760698.f1/Table II/hsa-miR-1825.tsv]

miR	targetscan	tarbase	miranda	mirbase	mirtarget2	pictar	GeneSymbol	GeneName
hsa-miR-1825	1	0	1	1	1	1	CDC42BPA	CDC42 binding protein kinase alpha (DMPK-like)
hsa-miR-1825	1	0	1	1	1	1	TTC39A	tetratricopeptide repeat domain 39A
hsa-miR-1825	1	0	1	1	0	0	DENND4B	DENN/MADD domain containing 4B
hsa-miR-1825	0	0	1	1	0	0	ZNF862	zinc finger protein 862
hsa-miR-1825	1	0	1	1	1	1	GPATCH8	G patch domain containing 8
hsa-miR-1825	1	0	1	1	0	0	PCLO	piccolo (presynaptic cytomatrix protein)
hsa-miR-1825	1	0	1	1	1	1	HIPK1	homeodomain interacting protein kinase 1
hsa-miR-1825	1	0	1	1	1	1	LPHN2	latrophilin 2
hsa-miR-1825	1	0	1	0	1	1	ATG14	autophagy related 14
hsa-miR-1825	1	0	1	1	1	1	ARHGEF15	Rho guanine nucleotide exchange factor (GEF) 15
hsa-miR-1825	1	0	1	1	1	1	CPEB3	cytoplasmic polyadenylation element binding protein 3
hsa-miR-1825	1	0	1	0	1	1	ODZ2	odz, odd Oz/ten-m homolog 2 (Drosophila)
hsa-miR-1825	1	0	1	0	0	0	HEG1	HEG homolog 1 (zebrafish)
hsa-miR-1825	1	0	1	1	1	1	PCDH19	protocadherin 19
hsa-miR-1825	0	0	1	1	1	1	NLGN3	neuroligin 3
hsa-miR-1825	1	0	1	1	1	1	FAM214B	family with sequence similarity 214, member B
hsa-miR-1825	0	0	1	1	1	1	AMBRA1	autophagy/beclin-1 regulator 1
hsa-miR-1825	0	0	1	0	1	1	SETD5	SET domain containing 5
hsa-miR-1825	1	0	1	0	1	1	JPH4	junctophilin 4
hsa-miR-1825	0	0	1	1	0	0	COL27A1	collagen, type XXVII, alpha 1
hsa-miR-1825	0	0	1	1	0	0	FAM65A	family with sequence similarity 65, member A
hsa-miR-1825	1	0	1	1	1	1	SSH3	slingshot homolog 3 (Drosophila)
hsa-miR-1825	0	0	1	0	0	0	NBLA00301	Nbla00301
hsa-miR-1825	1	0	1	0	1	1	RNF43	ring finger protein 43
hsa-miR-1825	0	0	1	1	1	1	NELL1	NEL-like 1 (chicken)
hsa-miR-1825	0	0	1	1	0	0	KREMEN2	kringle containing transmembrane protein 2
hsa-miR-1825	0	0	1	1	0	0	MED12	mediator complex subunit 12
hsa-miR-1825	1	0	1	1	1	1	PAN3	PAN3 poly(A) specific ribonuclease subunit homolog (S. cerevisiae)
hsa-miR-1825	0	0	1	1	0	0	SSPO	SCO-spondin homolog (Bos taurus)
hsa-miR-1825	0	0	1	1	1	1	BIRC5	baculoviral IAP repeat containing 5
hsa-miR-1825	1	0	1	1	1	1	KLHL5	kelch-like 5 (Drosophila)
hsa-miR-1825	1	0	1	1	1	1	DTNA	dystrobrevin, alpha
hsa-miR-1825	1	0	1	1	1	1	EPHA7	EPH receptor A7
hsa-miR-1825	0	0	1	1	0	0	ASIC3	acid-sensing (proton-gated) ion channel 3
hsa-miR-1825	0	0	1	1	1	1	RYR1	ryanodine receptor 1 (skeletal)
hsa-miR-1825	0	0	1	1	0	0	BMP1	bone morphogenetic protein 1
hsa-miR-1825	1	0	1	1	1	1	IPO8	importin 8
hsa-miR-1825	1	0	1	0	1	1	PDE7B	phosphodiesterase 7B
hsa-miR-1825	1	0	1	1	1	1	MYO9B	myosin IXB
hsa-miR-1825	1	0	1	1	1	1	PCDH17	protocadherin 17
hsa-miR-1825	1	0	1	1	1	1	SHOC2	soc-2 suppressor of clear homolog (C. elegans)
hsa-miR-1825	1	0	1	1	1	1	ERLIN1	ER lipid raft associated 1
hsa-miR-1825	0	0	1	1	1	1	ERAL1	Era G-protein-like 1 (E. coli)
hsa-miR-1825	0	0	1	1	1	1	PCBP4	poly(rC) binding protein 4
hsa-miR-1825	0	0	1	1	1	1	PANX1	pannexin 1
hsa-miR-1825	1	0	1	1	0	0	RASSF1	Ras association (RalGDS/AF-6) domain family member 1
hsa-miR-1825	1	0	1	0	1	1	WDR82	WD repeat domain 82
hsa-miR-1825	0	0	1	0	1	1	CLEC5A	C-type lectin domain family 5, member A
hsa-miR-1825	0	0	1	1	0	0	ANGPTL4	angiopoietin-like 4
hsa-miR-1825	0	0	1	0	1	1	ZDHHC17	zinc finger, DHHC-type containing 17
hsa-miR-1825	1	0	1	1	1	1	C16orf70	chromosome 16 open reading frame 70
hsa-miR-1825	0	0	1	1	1	1	SLC30A5	solute carrier family 30 (zinc transporter), member 5
hsa-miR-1825	0	0	1	1	0	0	SH2B1	SH2B adaptor protein 1
hsa-miR-1825	0	0	1	1	0	0	HES6	hairy and enhancer of split 6 (Drosophila)
hsa-miR-1825	1	0	1	1	1	1	TMUB2	transmembrane and ubiquitin-like domain containing 2
hsa-miR-1825	0	0	1	1	1	1	LRTOMT	leucine rich transmembrane and 0-methyltransferase domain containing
hsa-miR-1825	1	0	1	1	1	1	SPTBN4	spectrin, beta, non-erythrocytic 4
hsa-miR-1825	1	0	1	0	1	1	GLYR1	glyoxylate reductase 1 homolog (Arabidopsis)
hsa-miR-1825	0	0	1	1	0	0	TRO	trophinin
hsa-miR-1825	1	0	1	1	1	1	DDR1	discoidin domain receptor tyrosine kinase 1
hsa-miR-1825	1	0	1	1	1	1	PBX3	pre-B-cell leukemia homeobox 3
hsa-miR-1825	1	0	1	1	1	1	KCNIP2	Kv channel interacting protein 2
hsa-miR-1825	1	0	1	0	1	1	WIPF2	WAS/WASL interacting protein family, member 2
hsa-miR-1825	1	0	1	1	1	1	CALCOCO1	calcium binding and coiled-coil domain 1
hsa-miR-1825	1	0	1	1	1	1	STX16	syntaxin 16
hsa-miR-1825	1	0	1	1	1	1	CACNB2	calcium channel, voltage-dependent, beta 2 subunit
hsa-miR-1825	0	0	1	1	0	0	MPI	mannose phosphate isomerase
hsa-miR-1825	1	0	1	1	0	0	ST3GAL4	ST3 beta-galactoside alpha-2,3-sialyltransferase 4
hsa-miR-1825	0	0	1	1	1	1	TTLL11	tubulin tyrosine ligase-like family, member 11
hsa-miR-1825	0	0	1	0	0	0	CACNA2D3	calcium channel, voltage-dependent, alpha 2/delta subunit 3
hsa-miR-1825	1	0	1	1	1	1	PALM2	paralemmin 2
hsa-miR-1825	1	0	1	1	1	1	NFYA	nuclear transcription factor Y, alpha
hsa-miR-1825	0	0	1	1	1	1	TRDN	triadin
hsa-miR-1825	0	0	1	1	0	0	C22orf24	chromosome 22 open reading frame 24
hsa-miR-1825	0	0	1	1	0	0	GPRC5C	G protein-coupled receptor, family C, group 5, member C
hsa-miR-1825	1	0	1	1	1	1	AKAP2	A kinase (PRKA) anchor protein 2
hsa-miR-1825	0	0	1	1	1	1	OLFM4	olfactomedin 4
hsa-miR-1825	1	0	1	1	1	1	ARHGAP12	Rho GTPase activating protein 12
hsa-miR-1825	0	0	1	1	1	1	ARAP3	ArfGAP with RhoGAP domain, ankyrin repeat and PH domain 3
hsa-miR-1825	1	0	1	1	1	1	EIF2C1	eukaryotic translation initiation factor 2C, 1
hsa-miR-1825	0	0	1	1	1	1	OGFOD1	2-oxoglutarate and iron-dependent oxygenase domain containing 1
hsa-miR-1825	1	0	1	1	1	1	SLC38A2	solute carrier family 38, member 2
hsa-miR-1825	1	0	1	1	1	1	PHF20L1	PHD finger protein 20-like 1
hsa-miR-1825	0	0	1	0	0	0	LOC149134	uncharacterized LOC149134
hsa-miR-1825	0	0	1	0	0	0	DUXAP10	double homeobox A pseudogene 10
hsa-miR-1825	0	0	1	1	1	1	ARMC5	armadillo repeat containing 5
hsa-miR-1825	1	0	1	1	1	1	CC2D1A	coiled-coil and C2 domain containing 1A
hsa-miR-1825	1	0	1	1	1	1	BAZ2A	bromodomain adjacent to zinc finger domain, 2A
hsa-miR-1825	1	0	1	1	1	1	COPS7B	COP9 constitutive photomorphogenic homolog subunit 7B (Arabidopsis)
hsa-miR-1825	0	0	1	0	0	0	IFFO2	intermediate filament family orphan 2
hsa-miR-1825	0	0	1	0	1	1	ATXN1L	ataxin 1-like
hsa-miR-1825	0	0	1	1	0	0	PIF1	PIF1 5'-to-3' DNA helicase homolog (S. cerevisiae)
hsa-miR-1825	0	0	1	0	0	0	NEURL1B	neuralized homolog 1B (Drosophila)
hsa-miR-1825	1	0	1	1	1	1	RNF185	ring finger protein 185
hsa-miR-1825	1	0	1	1	1	1	ZNF462	zinc finger protein 462
hsa-miR-1825	0	0	1	1	1	1	THEM6	thioesterase superfamily member 6
hsa-miR-1825	0	0	1	1	1	1	FANCI	Fanconi anemia, complementation group I
hsa-miR-1825	0	0	1	1	0	0	LRCH3	leucine-rich repeats and calponin homology (CH) domain containing 3
hsa-miR-1825	0	0	1	0	0	0	LOC440894	uncharacterized LOC440894
hsa-miR-1825	1	0	1	1	1	1	LMNA	lamin A/C
hsa-miR-1825	0	0	1	1	0	0	PYGM	phosphorylase, glycogen, muscle
hsa-miR-1825	0	0	1	1	0	0	ACOT8	acyl-CoA thioesterase 8
hsa-miR-1825	0	0	1	1	1	1	ZNF606	zinc finger protein 606
hsa-miR-1825	0	0	1	1	0	0	RGL3	ral guanine nucleotide dissociation stimulator-like 3
hsa-miR-1825	1	0	1	1	1	1	MGAT1	mannosyl (alpha-1,3-)-glycoprotein beta-1,2-N-acetylglucosaminyltransferase
hsa-miR-1825	0	0	1	1	1	1	MS4A14	membrane-spanning 4-domains, subfamily A, member 14
hsa-miR-1825	0	0	1	0	1	1	CHURC1	churchill domain containing 1
hsa-miR-1825	0	0	1	0	0	0	LOC285074	anaphase promoting complex subunit 1 pseudogene
hsa-miR-1825	0	0	1	0	0	0	TUG1	taurine upregulated 1 (non-protein coding)
hsa-miR-1825	0	0	1	0	0	0	LINC00637	long intergenic non-protein coding RNA 637
hsa-miR-1825	0	0	1	0	0	0	C6orf228	chromosome 6 open reading frame 228
hsa-miR-1825	0	0	1	0	1	1	UHMK1	U2AF homology motif (UHM) kinase 1
hsa-miR-1825	1	0	1	1	1	1	FAM73B	family with sequence similarity 73, member B
hsa-miR-1825	1	0	1	1	1	1	ZNF449	zinc finger protein 449
hsa-miR-1825	0	0	1	1	0	0	HMCN2	hemicentin 2
hsa-miR-1825	0	0	1	1	0	0	C6orf132	chromosome 6 open reading frame 132
hsa-miR-1825	1	0	1	1	1	1	PRRT2	proline-rich transmembrane protein 2
hsa-miR-1825	1	0	1	1	1	1	SEC61A1	Sec61 alpha 1 subunit (S. cerevisiae)
hsa-miR-1825	1	0	1	1	0	0	B3GAT3	beta-1,3-glucuronyltransferase 3 (glucuronosyltransferase I)
hsa-miR-1825	0	0	1	0	0	0	LOC643837	uncharacterized LOC643837
hsa-miR-1825	0	0	1	1	1	1	MAPK10	mitogen-activated protein kinase 10
hsa-miR-1825	1	0	1	1	1	1	ARIH2	ariadne homolog 2 (Drosophila)
hsa-miR-1825	0	0	1	1	1	1	AP5S1	adaptor-related protein complex 5, sigma 1 subunit
hsa-miR-1825	0	0	1	0	0	0	LOC283887	uncharacterized LOC283887
hsa-miR-1825	1	0	1	1	1	1	HMOX2	heme oxygenase (decycling) 2
hsa-miR-1825	0	0	1	1	1	1	CYP11B1	cytochrome P450, family 11, subfamily B, polypeptide 1
hsa-miR-1825	0	0	1	0	0	0	CXXC1P1	CXXC finger protein 1 pseudogene 1
hsa-miR-1825	0	0	1	1	1	1	C19orf47	chromosome 19 open reading frame 47
hsa-miR-1825	1	0	1	1	1	1	KCND1	potassium voltage-gated channel, Shal-related subfamily, member 1
hsa-miR-1825	0	0	1	0	0	0	PART1	prostate androgen-regulated transcript 1 (non-protein coding)
hsa-miR-1825	1	0	1	0	1	1	GATAD2B	GATA zinc finger domain containing 2B
hsa-miR-1825	0	0	1	0	1	1	AGBL4	ATP/GTP binding protein-like 4
hsa-miR-1825	0	0	1	1	1	1	AIFM3	apoptosis-inducing factor, mitochondrion-associated, 3
hsa-miR-1825	1	0	1	1	1	1	LPPR2	lipid phosphate phosphatase-related protein type 2
hsa-miR-1825	1	0	1	1	1	1	RASGEF1A	RasGEF domain family, member 1A
hsa-miR-1825	0	0	1	1	1	1	LTBR	lymphotoxin beta receptor (TNFR superfamily, member 3)
hsa-miR-1825	1	0	1	1	1	1	SPATS2	spermatogenesis associated, serine-rich 2
hsa-miR-1825	0	0	1	0	0	0	LOC284577	uncharacterized LOC284577
hsa-miR-1825	1	0	1	0	1	1	CLIC4	chloride intracellular channel 4
hsa-miR-1825	1	0	1	1	1	1	EPB41L4A	erythrocyte membrane protein band 4.1 like 4A
hsa-miR-1825	0	0	1	0	0	0	ZNF815P	zinc finger protein 815, pseudogene
hsa-miR-1825	0	0	1	0	0	0	LINC00340	long intergenic non-protein coding RNA 340
hsa-miR-1825	1	0	1	1	1	1	EBF3	early B-cell factor 3
hsa-miR-1825	1	0	1	1	1	1	TMEM185A	transmembrane protein 185A
hsa-miR-1825	1	0	1	1	1	1	RAB11FIP4	RAB11 family interacting protein 4 (class II)
hsa-miR-1825	0	0	1	1	1	1	PPFIBP2	PTPRF interacting protein, binding protein 2 (liprin beta 2)
hsa-miR-1825	0	0	1	0	0	0	THAP7-AS1	THAP7 antisense RNA 1
hsa-miR-1825	1	0	1	1	1	1	LZTS2	leucine zipper, putative tumor suppressor 2
hsa-miR-1825	0	0	1	1	0	0	STXBP2	syntaxin binding protein 2
hsa-miR-1825	0	0	1	0	0	0	HLA-DQB2	major histocompatibility complex, class II, DQ beta 2
hsa-miR-1825	1	0	1	1	1	1	PIGA	phosphatidylinositol glycan anchor biosynthesis, class A
hsa-miR-1825	0	0	1	1	0	0	TMEM150A	transmembrane protein 150A
hsa-miR-1825	0	0	1	1	0	0	FBXO18	F-box protein, helicase, 18
hsa-miR-1825	0	0	1	0	1	1	EML5	echinoderm microtubule associated protein like 5
hsa-miR-1825	0	0	1	1	1	1	GGA1	golgi-associated, gamma adaptin ear containing, ARF binding protein 1
hsa-miR-1825	0	0	1	1	1	1	DNAJC24	DnaJ (Hsp40) homolog, subfamily C, member 24
hsa-miR-1825	0	0	1	0	0	0	C1orf132	chromosome 1 open reading frame 132
hsa-miR-1825	1	0	1	1	1	1	TPRG1	tumor protein p63 regulated 1
hsa-miR-1825	1	0	1	1	1	1	PLEKHH1	pleckstrin homology domain containing, family H (with MyTH4 domain) member 1
hsa-miR-1825	1	0	1	1	1	1	MDGA2	MAM domain containing glycosylphosphatidylinositol anchor 2
hsa-miR-1825	0	0	1	0	0	0	LGALS17A	Charcot-Leyden crystal protein pseudogene
hsa-miR-1825	0	0	1	0	0	0	LOC285043	uncharacterized LOC285043
hsa-miR-1825	0	0	1	1	0	0	C20orf27	chromosome 20 open reading frame 27
hsa-miR-1825	0	0	1	1	1	1	LRTM2	leucine-rich repeats and transmembrane domains 2
hsa-miR-1825	1	0	1	1	0	0	OSBPL5	oxysterol binding protein-like 5
hsa-miR-1825	0	0	1	1	0	0	FAM21B	family with sequence similarity 21, member B
hsa-miR-1825	1	0	1	0	0	0	ANKRD52	ankyrin repeat domain 52
hsa-miR-1825	0	0	1	0	0	0	FAM95B1	family with sequence similarity 95, member B1
hsa-miR-1825	0	0	1	1	1	1	EPPIN	epididymal peptidase inhibitor
hsa-miR-1825	1	0	1	1	1	1	ATP1A2	ATPase, Na+/K+ transporting, alpha 2 polypeptide
hsa-miR-1825	0	0	1	1	0	0	CCDC88B	coiled-coil domain containing 88B
hsa-miR-1825	1	0	1	1	1	1	DLG2	discs, large homolog 2 (Drosophila)
hsa-miR-1825	1	0	1	0	1	1	GPR180	G protein-coupled receptor 180
hsa-miR-1825	0	0	1	1	1	1	KLC4	kinesin light chain 4
hsa-miR-1825	0	0	1	0	0	0	LOC100127955	uncharacterized LOC100127955
hsa-miR-1825	1	0	1	1	1	1	CTNNA2	catenin (cadherin-associated protein), alpha 2
hsa-miR-1825	1	0	1	1	1	1	LSM14A	LSM14A, SCD6 homolog A (S. cerevisiae)
hsa-miR-1825	1	0	1	1	1	1	ENAH	enabled homolog (Drosophila)
hsa-miR-1825	0	0	1	1	0	0	AADACL3	arylacetamide deacetylase-like 3
hsa-miR-1825	0	0	1	1	0	0	TMEM136	transmembrane protein 136
hsa-miR-1825	1	0	1	1	1	1	SLC12A6	solute carrier family 12 (potassium/chloride transporters), member 6
hsa-miR-1825	1	0	1	0	1	1	KDM2A	lysine (K)-specific demethylase 2A
hsa-miR-1825	0	0	1	1	0	0	C17orf107	chromosome 17 open reading frame 107
hsa-miR-1825	0	0	1	0	0	0	EMBP1	embigin pseudogene 1
hsa-miR-1825	1	0	1	0	1	1	CYB561D1	cytochrome b-561 domain containing 1
hsa-miR-1825	1	0	1	1	1	1	CSNK1D	casein kinase 1, delta
hsa-miR-1825	1	0	1	1	1	1	CD200	CD200 molecule
hsa-miR-1825	0	0	1	1	0	0	HEATR8	HEAT repeat containing 8
hsa-miR-1825	0	0	1	1	1	1	BRAT1	BRCA1-associated ATM activator 1
hsa-miR-1825	0	0	1	0	0	0	LOC390660	FLJ00317 protein
hsa-miR-1825	0	0	1	1	1	1	ZNF346	zinc finger protein 346
hsa-miR-1825	0	0	1	1	1	1	PDE2A	phosphodiesterase 2A, cGMP-stimulated
hsa-miR-1825	0	0	1	0	1	1	PEX5	peroxisomal biogenesis factor 5
hsa-miR-1825	0	0	1	1	1	1	C5orf28	chromosome 5 open reading frame 28
hsa-miR-1825	1	0	1	1	0	0	ZNF219	zinc finger protein 219
hsa-miR-1825	0	0	1	1	1	1	PRSS16	protease, serine, 16 (thymus)
hsa-miR-1825	0	0	1	0	0	0	POM121L9P	POM121 transmembrane nucleoporin-like 9, pseudogene
hsa-miR-1825	0	0	1	1	0	0	TBC1D10B	TBC1 domain family, member 10B
hsa-miR-1825	1	0	1	0	1	1	DCDC2	doublecortin domain containing 2
hsa-miR-1825	0	0	1	0	0	0	KIAA0913	KIAA0913
hsa-miR-1825	1	0	1	1	1	1	PREX1	phosphatidylinositol-3,4,5-trisphosphate-dependent Rac exchange factor 1
hsa-miR-1825	1	0	1	0	1	1	GPR85	G protein-coupled receptor 85
hsa-miR-1825	0	0	1	0	0	0	FAM66D	family with sequence similarity 66, member D
hsa-miR-1825	0	0	1	0	1	1	GAB3	GRB2-associated binding protein 3
hsa-miR-1825	1	0	1	1	1	1	DNAJC10	DnaJ (Hsp40) homolog, subfamily C, member 10
hsa-miR-1825	0	0	1	0	0	0	FAM225A	family with sequence similarity 225, member A (non-protein coding)
hsa-miR-1825	1	0	1	0	1	1	GPCPD1	glycerophosphocholine phosphodiesterase GDE1 homolog (S. cerevisiae)
hsa-miR-1825	0	0	1	0	0	0	LOC286135	uncharacterized LOC286135
hsa-miR-1825	0	0	1	1	1	1	NFE2L1	nuclear factor (erythroid-derived 2)-like 1
hsa-miR-1825	1	0	1	1	1	1	NRP1	neuropilin 1
hsa-miR-1825	1	0	1	1	1	1	IL17RD	interleukin 17 receptor D
hsa-miR-1825	1	0	1	1	1	1	DIS3L2	DIS3 mitotic control homolog (S. cerevisiae)-like 2
hsa-miR-1825	1	0	1	1	1	1	ANKRD12	ankyrin repeat domain 12
hsa-miR-1825	1	0	1	0	1	1	JAZF1	JAZF zinc finger 1
hsa-miR-1825	0	0	1	1	1	1	KLHL7	kelch-like 7 (Drosophila)
hsa-miR-1825	0	0	1	1	1	1	ALS2CR8	amyotrophic lateral sclerosis 2 (juvenile) chromosome region, candidate 8
hsa-miR-1825	1	0	1	1	1	1	ZBTB8A	zinc finger and BTB domain containing 8A
hsa-miR-1825	0	0	1	1	0	0	CMTM1	CKLF-like MARVEL transmembrane domain containing 1
hsa-miR-1825	0	0	1	1	0	0	GLYCTK	glycerate kinase
hsa-miR-1825	0	0	1	1	1	1	GON4L	gon-4-like (C. elegans)
hsa-miR-1825	1	0	1	1	1	1	TMCC2	transmembrane and coiled-coil domain family 2
hsa-miR-1825	0	0	1	1	0	0	PDZD11	PDZ domain containing 11
hsa-miR-1825	1	0	1	0	1	1	LRAT	lecithin retinol acyltransferase (phosphatidylcholine--retinol O-acyltransferase)
hsa-miR-1825	0	0	1	1	1	1	TMUB1	transmembrane and ubiquitin-like domain containing 1
hsa-miR-1825	0	0	1	1	1	1	IL24	interleukin 24
hsa-miR-1825	0	0	1	1	1	1	SMPD1	sphingomyelin phosphodiesterase 1, acid lysosomal
hsa-miR-1825	0	0	1	1	0	0	C15orf61	chromosome 15 open reading frame 61
hsa-miR-1825	0	0	1	1	1	1	RHD	Rh blood group, D antigen
hsa-miR-1825	0	0	1	1	1	1	KCNJ13	potassium inwardly-rectifying channel, subfamily J, member 13
hsa-miR-1825	0	0	1	0	0	0	PTPRVP	protein tyrosine phosphatase, receptor type, V, pseudogene
hsa-miR-1825	0	0	1	1	1	1	NPC1L1	NPC1 (Niemann-Pick disease, type C1, gene)-like 1
hsa-miR-1825	1	0	1	1	1	1	AMOT	angiomotin
hsa-miR-1825	0	0	1	0	0	0	GBAP1	glucosidase, beta, acid pseudogene 1
hsa-miR-1825	1	0	1	1	1	1	HOXC13	homeobox C13
hsa-miR-1825	1	0	1	1	1	1	NUMA1	nuclear mitotic apparatus protein 1
hsa-miR-1825	1	0	1	1	1	1	MBNL1	muscleblind-like splicing regulator 1
hsa-miR-1825	0	0	1	0	0	0	LOC93622	Morf4 family associated protein 1-like 1 pseudogene
hsa-miR-1825	0	0	1	0	0	0	MGC13053	uncharacterized MGC13053
hsa-miR-1825	1	0	1	1	1	1	U2SURP	U2 snRNP-associated SURP domain containing
hsa-miR-1825	1	0	1	1	0	0	SAP30BP	SAP30 binding protein
hsa-miR-1825	1	0	1	1	1	1	HMGA1	high mobility group AT-hook 1
hsa-miR-1825	0	0	1	1	1	1	ATXN2L	ataxin 2-like
hsa-miR-1825	1	0	1	1	1	1	TRIM2	tripartite motif containing 2
hsa-miR-1825	1	0	1	1	1	1	OTUD5	OTU domain containing 5
hsa-miR-1825	0	0	1	0	0	0	GRAMD1B	GRAM domain containing 1B
hsa-miR-1825	0	0	1	1	1	1	DEDD2	death effector domain containing 2
hsa-miR-1825	0	0	1	1	0	0	MAST2	microtubule associated serine/threonine kinase 2
hsa-miR-1825	1	0	1	1	1	1	NUMBL	numb homolog (Drosophila)-like
hsa-miR-1825	1	0	1	1	1	1	WIPI2	WD repeat domain, phosphoinositide interacting 2
hsa-miR-1825	1	0	1	1	1	1	ELF4	E74-like factor 4 (ets domain transcription factor)
hsa-miR-1825	1	0	1	1	1	1	MID1IP1	MID1 interacting protein 1
hsa-miR-1825	0	0	1	1	0	0	PTPMT1	protein tyrosine phosphatase, mitochondrial 1
hsa-miR-1825	1	0	1	0	1	1	BTF3L4	basic transcription factor 3-like 4
hsa-miR-1825	0	0	1	0	0	0	AZGP1P1	alpha-2-glycoprotein 1, zinc-binding pseudogene 1
hsa-miR-1825	0	0	1	1	1	1	PDE1C	phosphodiesterase 1C, calmodulin-dependent 70kDa
hsa-miR-1825	1	0	1	1	1	1	BEND6	BEN domain containing 6
hsa-miR-1825	0	0	1	1	0	0	CCDC114	coiled-coil domain containing 114
hsa-miR-1825	0	0	1	1	1	1	TRIM4	tripartite motif containing 4
hsa-miR-1825	0	0	1	1	0	0	PRRG2	proline rich Gla (G-carboxyglutamic acid) 2
hsa-miR-1825	0	0	1	1	1	1	HS1BP3	HCLS1 binding protein 3
hsa-miR-1825	1	0	1	1	1	1	TMEM127	transmembrane protein 127
hsa-miR-1825	0	0	1	1	1	1	KIAA1755	KIAA1755
hsa-miR-1825	1	0	1	1	1	1	GABRA1	gamma-aminobutyric acid (GABA) A receptor, alpha 1
hsa-miR-1825	1	0	1	1	1	1	MUM1L1	melanoma associated antigen (mutated) 1-like 1
hsa-miR-1825	1	0	1	1	1	1	BZRAP1	benzodiazapine receptor (peripheral) associated protein 1
hsa-miR-1825	1	0	1	1	1	1	PFAS	phosphoribosylformylglycinamidine synthase
hsa-miR-1825	0	0	1	1	1	1	C7orf53	chromosome 7 open reading frame 53
hsa-miR-1825	0	0	1	1	0	0	GDF5	growth differentiation factor 5
hsa-miR-1825	0	0	1	0	0	0	BCAS3	breast carcinoma amplified sequence 3
hsa-miR-1825	0	0	1	1	0	0	RELA	v-rel reticuloendotheliosis viral oncogene homolog A (avian)
hsa-miR-1825	1	0	1	1	1	1	FAM189B	family with sequence similarity 189, member B
hsa-miR-1825	1	0	1	0	1	1	KIF5A	kinesin family member 5A
hsa-miR-1825	1	0	1	1	1	1	RIC8B	resistance to inhibitors of cholinesterase 8 homolog B (C. elegans)
hsa-miR-1825	0	0	1	1	0	0	CCDC158	coiled-coil domain containing 158
hsa-miR-1825	0	0	1	1	0	0	TSNAXIP1	translin-associated factor X interacting protein 1
hsa-miR-1825	0	0	1	0	1	1	FAM72A	family with sequence similarity 72, member A
hsa-miR-1825	1	0	1	1	1	1	ZEB2	zinc finger E-box binding homeobox 2
hsa-miR-1825	0	0	1	0	0	0	LOC339862	uncharacterized LOC339862
hsa-miR-1825	1	0	1	1	1	1	ZNF618	zinc finger protein 618
hsa-miR-1825	0	0	1	0	0	0	SPATA3	spermatogenesis associated 3
hsa-miR-1825	0	0	1	0	0	0	LINC00642	long intergenic non-protein coding RNA 642
hsa-miR-1825	0	0	1	0	0	0	LOC654433	uncharacterized LOC654433
hsa-miR-1825	0	0	1	1	1	1	CELF1	CUGBP, Elav-like family member 1
hsa-miR-1825	1	0	1	0	1	1	CPEB4	cytoplasmic polyadenylation element binding protein 4
hsa-miR-1825	0	0	1	1	1	1	FAM71F1	family with sequence similarity 71, member F1
hsa-miR-1825	1	0	1	1	1	1	FAM135B	family with sequence similarity 135, member B
hsa-miR-1825	1	0	1	0	1	1	YAF2	YY1 associated factor 2
hsa-miR-1825	0	0	1	0	0	0	CRYBB2P1	crystallin, beta B2 pseudogene 1
hsa-miR-1825	1	0	1	1	0	0	CHD4	chromodomain helicase DNA binding protein 4
hsa-miR-1825	0	0	1	0	0	0	LOC100134868	uncharacterized LOC100134868
hsa-miR-1825	0	0	1	1	0	0	CCDC152	coiled-coil domain containing 152
hsa-miR-1825	0	0	1	0	0	0	LOC401074	uncharacterized LOC401074
hsa-miR-1825	1	0	1	1	1	1	UNK	unkempt homolog (Drosophila)
hsa-miR-1825	0	0	1	0	1	1	MYO3B	myosin IIIB
hsa-miR-1825	0	0	1	1	1	1	ZFP90	zinc finger protein 90 homolog (mouse)
hsa-miR-1825	0	0	1	1	0	0	SLC13A4	solute carrier family 13 (sodium/sulfate symporters), member 4
hsa-miR-1825	1	0	1	0	1	1	HSPA12A	heat shock 70kDa protein 12A
hsa-miR-1825	1	0	1	1	1	1	ROCK1	Rho-associated, coiled-coil containing protein kinase 1
hsa-miR-1825	0	0	1	1	1	1	GOLGA6L9	golgin A6 family-like 9
hsa-miR-1825	0	0	1	1	1	1	MTHFD2L	methylenetetrahydrofolate dehydrogenase (NADP+ dependent) 2-like
hsa-miR-1825	0	0	1	1	0	0	PTOV1	prostate tumor overexpressed 1
hsa-miR-1825	0	0	1	0	0	0	LOC338579	ankyrin repeat domain-containing protein 30B pseudogene
hsa-miR-1825	0	0	1	1	1	1	DGKH	diacylglycerol kinase, eta
hsa-miR-1825	0	0	1	0	0	0	LOC338739	uncharacterized LOC338739
hsa-miR-1825	1	0	1	1	0	0	WNK1	WNK lysine deficient protein kinase 1
hsa-miR-1825	0	0	1	1	1	1	C14orf45	chromosome 14 open reading frame 45
hsa-miR-1825	1	0	1	1	1	1	PPP2R5B	protein phosphatase 2, regulatory subunit B', beta
hsa-miR-1825	0	0	1	1	0	0	FAM72B	family with sequence similarity 72, member B
hsa-miR-1825	1	0	1	1	0	0	TMEM219	transmembrane protein 219
hsa-miR-1825	0	0	1	1	1	1	LINC00086	long intergenic non-protein coding RNA 86
hsa-miR-1825	1	0	1	1	1	1	LIMD2	LIM domain containing 2
hsa-miR-1825	0	0	1	1	1	1	HLA-DQA1	major histocompatibility complex, class II, DQ alpha 1
hsa-miR-1825	0	0	1	1	0	0	EDC4	enhancer of mRNA decapping 4
hsa-miR-1825	1	0	1	1	1	1	RCC2	regulator of chromosome condensation 2
hsa-miR-1825	0	0	1	1	0	0	GRIN2C	glutamate receptor, ionotropic, N-methyl D-aspartate 2C
hsa-miR-1825	0	0	1	1	0	0	NAA10	N(alpha)-acetyltransferase 10, NatA catalytic subunit
hsa-miR-1825	1	0	1	1	1	1	ADCY6	adenylate cyclase 6
hsa-miR-1825	0	0	1	1	1	1	ZNF189	zinc finger protein 189
hsa-miR-1825	1	0	1	1	1	1	LMO4	LIM domain only 4
hsa-miR-1825	0	0	1	0	0	0	LINC00052	long intergenic non-protein coding RNA 52
hsa-miR-1825	1	0	1	1	1	1	NRSN1	neurensin 1
hsa-miR-1825	1	0	1	1	1	1	CDKN1C	cyclin-dependent kinase inhibitor 1C (p57, Kip2)
hsa-miR-1825	0	0	1	1	1	1	SLAMF1	signaling lymphocytic activation molecule family member 1
hsa-miR-1825	1	0	1	1	1	1	MAPKAPK3	mitogen-activated protein kinase-activated protein kinase 3
hsa-miR-1825	0	0	1	1	1	1	AQPEP	laeverin
hsa-miR-1825	0	0	1	1	0	0	TRIM46	tripartite motif containing 46
hsa-miR-1825	1	0	1	1	1	1	SOCS2	suppressor of cytokine signaling 2
hsa-miR-1825	0	0	1	1	1	1	MSTO1	misato homolog 1 (Drosophila)
hsa-miR-1825	0	0	1	0	0	0	ZRANB2-AS1	ZRANB2 antisense RNA 1
hsa-miR-1825	1	0	1	0	1	1	TGFBR1	transforming growth factor, beta receptor 1
hsa-miR-1825	0	0	1	0	0	0	LOC440416	uncharacterized LOC440416
hsa-miR-1825	0	0	1	0	1	1	TNFRSF8	tumor necrosis factor receptor superfamily, member 8
hsa-miR-1825	0	0	1	1	0	0	FAM21A	family with sequence similarity 21, member A
hsa-miR-1825	0	0	1	1	0	0	DNHD1	dynein heavy chain domain 1
hsa-miR-1825	1	0	1	1	1	1	FMNL3	formin-like 3
hsa-miR-1825	1	0	1	1	1	1	ESRRA	estrogen-related receptor alpha
hsa-miR-1825	1	0	1	1	1	1	ACVR2B	activin A receptor, type IIB
hsa-miR-1825	0	1	1	1	0	0	PKM	pyruvate kinase, muscle
hsa-miR-1825	0	0	1	1	1	1	KLRF1	killer cell lectin-like receptor subfamily F, member 1
hsa-miR-1825	0	0	1	0	0	0	ABCA11P	ATP-binding cassette, sub-family A (ABC1), member 11, pseudogene
hsa-miR-1825	1	0	1	0	1	1	LRRTM4	leucine rich repeat transmembrane neuronal 4
hsa-miR-1825	1	0	1	0	1	1	ARPP19	cAMP-regulated phosphoprotein, 19kDa
hsa-miR-1825	0	0	1	1	0	0	TMC1	transmembrane channel-like 1
hsa-miR-1825	1	0	1	1	0	0	KIAA1644	KIAA1644
hsa-miR-1825	1	0	1	1	1	1	ACHE	acetylcholinesterase
hsa-miR-1825	1	0	1	1	1	1	PNISR	PNN-interacting serine/arginine-rich protein
hsa-miR-1825	1	0	1	1	1	1	OTUD4	OTU domain containing 4
hsa-miR-1825	0	0	1	0	0	0	LINC00486	long intergenic non-protein coding RNA 486
hsa-miR-1825	0	0	1	0	0	0	CCT6P1	chaperonin containing TCP1, subunit 6 (zeta) pseudogene 1
hsa-miR-1825	1	0	1	1	1	1	CHIC1	cysteine-rich hydrophobic domain 1
hsa-miR-1825	0	0	1	0	1	1	C20orf202	chromosome 20 open reading frame 202
hsa-miR-1825	0	0	1	1	1	1	TPRN	taperin
hsa-miR-1825	0	0	1	0	0	0	FAM225B	family with sequence similarity 225, member B (non-protein coding)
hsa-miR-1825	1	0	1	1	1	1	PHC2	polyhomeotic homolog 2 (Drosophila)
hsa-miR-1825	1	0	1	1	1	1	FNDC3A	fibronectin type III domain containing 3A
hsa-miR-1825	0	0	1	1	1	1	PDE6B	phosphodiesterase 6B, cGMP-specific, rod, beta
hsa-miR-1825	0	0	1	0	0	0	MEG3	maternally expressed 3 (non-protein coding)
hsa-miR-1825	1	0	1	1	1	1	CCNK	cyclin K
hsa-miR-1825	1	0	1	1	0	0	KRT80	keratin 80
hsa-miR-1825	1	0	1	1	1	1	ATP2B4	ATPase, Ca++ transporting, plasma membrane 4
hsa-miR-1825	1	0	1	1	1	1	SUN2	Sad1 and UNC84 domain containing 2
hsa-miR-1825	1	0	1	1	1	1	NIPAL3	NIPA-like domain containing 3
hsa-miR-1825	0	0	1	1	1	1	APTX	aprataxin
hsa-miR-1825	1	0	1	1	1	1	ETS1	v-ets erythroblastosis virus E26 oncogene homolog 1 (avian)
hsa-miR-1825	1	0	1	1	1	1	SLC35F1	solute carrier family 35, member F1
hsa-miR-1825	0	0	1	1	1	1	PSMA2	proteasome (prosome, macropain) subunit, alpha type, 2
hsa-miR-1825	1	0	1	0	1	1	GALNT4	UDP-N-acetyl-alpha-D-galactosamine:polypeptide N-acetylgalactosaminyltransferase 4 (GalNAc-T4)
hsa-miR-1825	1	0	1	1	1	1	PRDM2	PR domain containing 2, with ZNF domain
hsa-miR-1825	0	0	1	1	0	0	TMOD4	tropomodulin 4 (muscle)
hsa-miR-1825	1	0	1	1	0	0	CECR2	cat eye syndrome chromosome region, candidate 2
hsa-miR-1825	0	0	1	1	1	1	FAM9C	family with sequence similarity 9, member C
hsa-miR-1825	1	0	1	1	1	1	TLN2	talin 2
hsa-miR-1825	1	0	1	1	1	1	EPS15	epidermal growth factor receptor pathway substrate 15
hsa-miR-1825	1	0	1	1	1	1	PHC3	polyhomeotic homolog 3 (Drosophila)
hsa-miR-1825	0	0	1	1	0	0	SBSN	suprabasin
hsa-miR-1825	1	0	1	1	1	1	NAV1	neuron navigator 1
hsa-miR-1825	1	0	1	1	1	1	C5orf24	chromosome 5 open reading frame 24
hsa-miR-1825	0	0	1	0	0	0	ZNRD1-AS1	ZNRD1 antisense RNA 1
hsa-miR-1825	0	0	1	1	1	1	SSFA2	sperm specific antigen 2
hsa-miR-1825	0	0	1	1	0	0	PITRM1	pitrilysin metallopeptidase 1
hsa-miR-1825	1	0	1	1	1	1	HIC2	hypermethylated in cancer 2
hsa-miR-1825	1	0	1	0	0	0	PLSCR5	phospholipid scramblase family, member 5
hsa-miR-1825	0	0	1	1	0	0	STMN4	stathmin-like 4
hsa-miR-1825	1	0	1	1	0	0	SMARCA2	SWI/SNF related, matrix associated, actin dependent regulator of chromatin, subfamily a, member 2
hsa-miR-1825	0	0	1	1	1	1	HEXA	hexosaminidase A (alpha polypeptide)
hsa-miR-1825	1	0	1	1	1	1	FUT9	fucosyltransferase 9 (alpha (1,3) fucosyltransferase)
hsa-miR-1825	0	0	1	0	0	0	AKR1A1	aldo-keto reductase family 1, member A1 (aldehyde reductase)
hsa-miR-1825	0	0	1	1	1	1	CETN2	centrin, EF-hand protein, 2
hsa-miR-1825	1	0	1	1	1	1	TARBP2	TAR (HIV-1) RNA binding protein 2
hsa-miR-1825	0	0	1	0	0	0	LOC400768	uncharacterized LOC400768
hsa-miR-1825	1	0	1	1	1	1	ERI3	ERI1 exoribonuclease family member 3
hsa-miR-1825	1	0	1	1	1	1	CNIH2	cornichon homolog 2 (Drosophila)
hsa-miR-1825	1	1	1	1	0	0	EFNA3	ephrin-A3
hsa-miR-1825	0	0	1	1	0	0	RPL11	ribosomal protein L11
hsa-miR-1825	1	0	1	0	1	1	BNIP3L	BCL2/adenovirus E1B 19kDa interacting protein 3-like
hsa-miR-1825	0	0	1	0	0	0	H19	H19, imprinted maternally expressed transcript (non-protein coding)
hsa-miR-1825	0	0	1	1	1	1	BCL7B	B-cell CLL/lymphoma 7B
hsa-miR-1825	1	0	1	1	1	1	ACTG1	actin, gamma 1
hsa-miR-1825	0	0	1	1	1	1	COPS7A	COP9 constitutive photomorphogenic homolog subunit 7A (Arabidopsis)
hsa-miR-1825	1	0	1	1	1	1	PLEKHB2	pleckstrin homology domain containing, family B (evectins) member 2
hsa-miR-1825	0	0	1	1	1	1	C1orf123	chromosome 1 open reading frame 123
hsa-miR-1825	0	0	1	1	1	1	GRAP2	GRB2-related adaptor protein 2
hsa-miR-1825	1	0	1	0	1	1	RPS6KB1	ribosomal protein S6 kinase, 70kDa, polypeptide 1
hsa-miR-1825	1	0	1	1	1	1	ARFIP2	ADP-ribosylation factor interacting protein 2
hsa-miR-1825	1	0	1	1	1	1	STK38L	serine/threonine kinase 38 like
hsa-miR-1825	0	0	1	1	0	0	MAST1	microtubule associated serine/threonine kinase 1
hsa-miR-1825	1	0	1	1	1	1	MMP2	matrix metallopeptidase 2 (gelatinase A, 72kDa gelatinase, 72kDa type IV collagenase)
hsa-miR-1825	0	0	1	1	0	0	NIT1	nitrilase 1
hsa-miR-1825	0	0	1	1	1	1	ZDHHC16	zinc finger, DHHC-type containing 16
hsa-miR-1825	0	0	1	0	0	0	LOC645513	uncharacterized LOC645513
hsa-miR-1825	0	0	1	1	1	1	SEC11A	SEC11 homolog A (S. cerevisiae)
hsa-miR-1825	0	0	1	1	1	1	PDE4DIP	phosphodiesterase 4D interacting protein
hsa-miR-1825	1	0	1	1	1	1	ARL4A	ADP-ribosylation factor-like 4A
hsa-miR-1825	1	0	1	1	1	1	BAALC	brain and acute leukemia, cytoplasmic
hsa-miR-1825	1	0	1	1	1	1	ARMC8	armadillo repeat containing 8
hsa-miR-1825	0	0	1	1	0	0	BCKDK	branched chain ketoacid dehydrogenase kinase
hsa-miR-1825	0	0	1	1	0	0	TUBA8	tubulin, alpha 8
hsa-miR-1825	1	0	1	1	1	1	ATP1B1	ATPase, Na+/K+ transporting, beta 1 polypeptide
hsa-miR-1825	0	0	1	0	0	0	PRMT1	protein arginine methyltransferase 1
hsa-miR-1825	0	0	1	1	0	0	IL11RA	interleukin 11 receptor, alpha
hsa-miR-1825	0	0	1	1	1	1	UPRT	uracil phosphoribosyltransferase (FUR1) homolog (S. cerevisiae)
hsa-miR-1825	1	0	1	1	1	1	PHACTR2	phosphatase and actin regulator 2
hsa-miR-1825	1	0	1	1	1	1	SLC39A10	solute carrier family 39 (zinc transporter), member 10
hsa-miR-1825	1	0	1	1	1	1	ADD1	adducin 1 (alpha)
hsa-miR-1825	1	0	1	1	1	1	SLC30A7	solute carrier family 30 (zinc transporter), member 7
hsa-miR-1825	1	0	1	1	1	1	SP2	Sp2 transcription factor
hsa-miR-1825	1	0	1	1	1	1	GLIS3	GLIS family zinc finger 3
hsa-miR-1825	1	0	1	1	0	0	LGSN	lengsin, lens protein with glutamine synthetase domain
hsa-miR-1825	1	0	1	0	1	1	DCBLD2	discoidin, CUB and LCCL domain containing 2
hsa-miR-1825	1	0	1	0	1	1	EPDR1	ependymin related protein 1 (zebrafish)
hsa-miR-1825	0	0	1	0	0	0	GPR144	G protein-coupled receptor 144
hsa-miR-1825	0	0	1	1	1	1	ALDH3B1	aldehyde dehydrogenase 3 family, member B1
hsa-miR-1825	1	0	1	1	1	1	AFF1	AF4/FMR2 family, member 1
hsa-miR-1825	0	0	1	1	0	0	EMD	emerin
hsa-miR-1825	0	0	1	1	0	0	FANCA	Fanconi anemia, complementation group A
hsa-miR-1825	0	0	1	1	0	0	GBA	glucosidase, beta, acid
hsa-miR-1825	1	0	1	0	1	1	SGCB	sarcoglycan, beta (43kDa dystrophin-associated glycoprotein)
hsa-miR-1825	0	0	1	1	1	1	LPL	lipoprotein lipase
hsa-miR-1825	1	0	1	1	1	1	MITF	microphthalmia-associated transcription factor
hsa-miR-1825	0	0	1	1	1	1	PRNP	prion protein
hsa-miR-1825	0	0	1	1	0	0	TGM1	transglutaminase 1 (K polypeptide epidermal type I, protein-glutamine-gamma-glutamyltransferase)
hsa-miR-1825	0	0	1	1	1	1	PLEC	plectin
hsa-miR-1825	0	0	1	1	0	0	APOA4	apolipoprotein A-IV
hsa-miR-1825	1	0	1	1	1	1	CD44	CD44 molecule (Indian blood group)
hsa-miR-1825	0	0	1	1	1	1	IGF2	insulin-like growth factor 2 (somatomedin A)
hsa-miR-1825	0	0	1	1	1	1	IL11	interleukin 11
hsa-miR-1825	0	0	1	1	1	1	AGTR1	angiotensin II receptor, type 1
hsa-miR-1825	0	0	1	1	0	0	AVPR1B	arginine vasopressin receptor 1B
hsa-miR-1825	1	0	1	1	1	1	CSF1	colony stimulating factor 1 (macrophage)
hsa-miR-1825	1	0	1	1	0	0	GRIK3	glutamate receptor, ionotropic, kainate 3
hsa-miR-1825	0	0	1	1	1	1	GRM3	glutamate receptor, metabotropic 3
hsa-miR-1825	1	0	1	1	1	1	HTR4	5-hydroxytryptamine (serotonin) receptor 4, G protein-coupled
hsa-miR-1825	0	0	1	1	1	1	HTR7	5-hydroxytryptamine (serotonin) receptor 7, adenylate cyclase-coupled
hsa-miR-1825	1	0	1	0	1	1	KCNJ2	potassium inwardly-rectifying channel, subfamily J, member 2
hsa-miR-1825	0	0	1	0	0	0	KLK2	kallikrein-related peptidase 2
hsa-miR-1825	1	0	1	1	1	1	LCLAT1	lysocardiolipin acyltransferase 1
hsa-miR-1825	0	0	1	1	1	1	STAG3L1	stromal antigen 3-like 1
hsa-miR-1825	0	0	1	1	1	1	C11orf49	chromosome 11 open reading frame 49
hsa-miR-1825	0	0	1	1	1	1	ALG11	asparagine-linked glycosylation 11, alpha-1,2-mannosyltransferase homolog (yeast)
hsa-miR-1825	1	0	1	0	1	1	SS18	synovial sarcoma translocation, chromosome 18
hsa-miR-1825	1	0	1	1	1	1	ZDHHC9	zinc finger, DHHC-type containing 9
hsa-miR-1825	1	0	1	1	1	1	BCAP29	B-cell receptor-associated protein 29
hsa-miR-1825	1	0	1	0	1	1	KIAA2022	KIAA2022
hsa-miR-1825	1	0	1	1	1	1	EML1	echinoderm microtubule associated protein like 1
hsa-miR-1825	0	0	1	0	1	1	LPPR5	lipid phosphate phosphatase-related protein type 5
hsa-miR-1825	1	0	1	0	1	1	C6orf222	chromosome 6 open reading frame 222
hsa-miR-1825	0	0	1	0	0	0	LOC441956	uncharacterized LOC441956
hsa-miR-1825	1	0	1	1	1	1	NLE1	notchless homolog 1 (Drosophila)
hsa-miR-1825	1	0	1	1	1	1	NCDN	neurochondrin
hsa-miR-1825	1	0	1	1	1	1	RUNX2	runt-related transcription factor 2
hsa-miR-1825	0	0	1	1	0	0	RTKN	rhotekin
hsa-miR-1825	1	0	1	0	1	1	GOPC	golgi-associated PDZ and coiled-coil motif containing
hsa-miR-1825	0	0	1	1	1	1	VPS13A	vacuolar protein sorting 13 homolog A (S. cerevisiae)
hsa-miR-1825	0	0	1	1	0	0	POLR3H	polymerase (RNA) III (DNA directed) polypeptide H (22.9kD)
hsa-miR-1825	1	0	1	1	1	1	NTRK2	neurotrophic tyrosine kinase, receptor, type 2
hsa-miR-1825	1	0	1	0	1	1	GCH1	GTP cyclohydrolase 1
hsa-miR-1825	1	0	1	0	1	1	BCL7A	B-cell CLL/lymphoma 7A
hsa-miR-1825	1	0	1	0	1	1	TNRC6B	trinucleotide repeat containing 6B
hsa-miR-1825	0	0	1	1	0	0	ARPC4	actin related protein 2/3 complex, subunit 4, 20kDa
hsa-miR-1825	1	0	1	1	1	1	AFF3	AF4/FMR2 family, member 3
hsa-miR-1825	0	0	1	1	1	1	CIB4	calcium and integrin binding family member 4
hsa-miR-1825	0	0	1	1	0	0	KLK3	kallikrein-related peptidase 3
hsa-miR-1825	1	0	1	0	1	1	CYB5RL	cytochrome b5 reductase-like
hsa-miR-1825	1	0	1	1	0	0	CRELD1	cysteine-rich with EGF-like domains 1
hsa-miR-1825	1	0	1	1	1	1	KLF10	Kruppel-like factor 10
hsa-miR-1825	1	0	1	1	1	1	DLX1	distal-less homeobox 1
hsa-miR-1825	0	0	1	0	1	1	ZNF705D	zinc finger protein 705D
hsa-miR-1825	0	0	1	1	1	1	MESP2	mesoderm posterior 2 homolog (mouse)
hsa-miR-1825	0	0	1	0	1	1	OPALIN	oligodendrocytic myelin paranodal and inner loop protein
hsa-miR-1825	1	0	1	1	1	1	CEP63	centrosomal protein 63kDa
hsa-miR-1825	1	0	1	0	1	1	TMEM237	transmembrane protein 237
hsa-miR-1825	0	0	1	1	1	1	FAM22G	family with sequence similarity 22, member G
hsa-miR-1825	0	0	1	1	1	1	TUBG1	tubulin, gamma 1
hsa-miR-1825	1	0	1	1	1	1	PRR3	proline rich 3
hsa-miR-1825	0	0	1	1	1	1	VCAM1	vascular cell adhesion molecule 1
hsa-miR-1825	0	0	1	1	0	0	CFC1B	cripto, FRL-1, cryptic family 1B
hsa-miR-1825	0	0	1	1	1	1	DIAPH1	diaphanous homolog 1 (Drosophila)
hsa-miR-1825	1	0	1	0	1	1	PDE5A	phosphodiesterase 5A, cGMP-specific
hsa-miR-1825	1	0	1	1	1	1	CREBL2	cAMP responsive element binding protein-like 2
hsa-miR-1825	1	0	1	1	1	1	S1PR1	sphingosine-1-phosphate receptor 1
hsa-miR-1825	1	0	1	1	1	1	EP300	E1A binding protein p300
hsa-miR-1825	0	0	1	1	1	1	ARF5	ADP-ribosylation factor 5
hsa-miR-1825	0	0	1	0	0	0	BAI1	brain-specific angiogenesis inhibitor 1
hsa-miR-1825	0	0	1	1	1	1	CD1D	CD1d molecule
hsa-miR-1825	0	0	1	1	1	1	CD22	CD22 molecule
hsa-miR-1825	1	0	1	1	1	1	CDH2	cadherin 2, type 1, N-cadherin (neuronal)
hsa-miR-1825	0	0	1	1	1	1	CHGB	chromogranin B (secretogranin 1)
hsa-miR-1825	1	0	1	1	1	1	CLCN3	chloride channel, voltage-sensitive 3
hsa-miR-1825	1	0	1	1	1	1	CLCN4	chloride channel, voltage-sensitive 4
hsa-miR-1825	1	0	1	1	1	1	DSC3	desmocollin 3
hsa-miR-1825	0	0	1	1	1	1	FLI1	Friend leukemia virus integration 1
hsa-miR-1825	0	0	1	1	0	0	FUT5	fucosyltransferase 5 (alpha (1,3) fucosyltransferase)
hsa-miR-1825	1	0	1	1	1	1	ITGB8	integrin, beta 8
hsa-miR-1825	1	0	1	1	1	1	KCNA6	potassium voltage-gated channel, shaker-related subfamily, member 6
hsa-miR-1825	0	0	1	0	1	1	KCNN1	potassium intermediate/small conductance calcium-activated channel, subfamily N, member 1
hsa-miR-1825	0	0	1	1	0	0	KRT4	keratin 4
hsa-miR-1825	1	0	1	1	1	1	LIFR	leukemia inhibitory factor receptor alpha
hsa-miR-1825	1	0	1	1	1	1	LY75	lymphocyte antigen 75
hsa-miR-1825	1	0	1	0	1	1	MXD1	MAX dimerization protein 1
hsa-miR-1825	1	0	1	1	1	1	MAFG	v-maf musculoaponeurotic fibrosarcoma oncogene homolog G (avian)
hsa-miR-1825	1	0	1	1	1	1	MSN	moesin
hsa-miR-1825	1	0	1	1	1	1	FURIN	furin (paired basic amino acid cleaving enzyme)
hsa-miR-1825	1	0	1	0	1	1	PAPPA	pregnancy-associated plasma protein A, pappalysin 1
hsa-miR-1825	1	0	1	1	1	1	PHB	prohibitin
hsa-miR-1825	0	0	1	1	1	1	SERPINB8	serpin peptidase inhibitor, clade B (ovalbumin), member 8
hsa-miR-1825	0	0	1	1	1	1	SEPT5	septin 5
hsa-miR-1825	0	0	1	1	0	0	PSMD8	proteasome (prosome, macropain) 26S subunit, non-ATPase, 8
hsa-miR-1825	1	0	1	1	1	1	PTPRK	protein tyrosine phosphatase, receptor type, K
hsa-miR-1825	0	0	1	1	1	1	S100A3	S100 calcium binding protein A3
hsa-miR-1825	0	0	1	1	1	1	SDC4	syndecan 4
hsa-miR-1825	1	0	1	1	1	1	SRSF2	serine/arginine-rich splicing factor 2
hsa-miR-1825	1	0	1	0	1	1	SOX11	SRY (sex determining region Y)-box 11
hsa-miR-1825	1	0	1	1	1	1	SRF	serum response factor (c-fos serum response element-binding transcription factor)
hsa-miR-1825	1	0	1	1	1	1	SUV39H1	suppressor of variegation 3-9 homolog 1 (Drosophila)
hsa-miR-1825	1	0	1	1	1	1	TRAPPC10	trafficking protein particle complex 10
hsa-miR-1825	0	0	1	1	1	1	ZNF137P	zinc finger protein 137, pseudogene
hsa-miR-1825	1	0	1	0	1	1	BSN	bassoon (presynaptic cytomatrix protein)
hsa-miR-1825	1	0	1	1	1	1	KCNAB1	potassium voltage-gated channel, shaker-related subfamily, beta member 1
hsa-miR-1825	1	0	1	0	1	1	SNN	stannin
hsa-miR-1825	0	0	1	1	1	1	ITGA10	integrin, alpha 10
hsa-miR-1825	1	0	1	1	1	1	BHLHE40	basic helix-loop-helix family, member e40
hsa-miR-1825	1	0	1	0	1	1	WASL	Wiskott-Aldrich syndrome-like
hsa-miR-1825	1	0	1	1	1	1	SYT7	synaptotagmin VII
hsa-miR-1825	1	0	1	1	1	1	ASTN1	astrotactin 1
hsa-miR-1825	0	0	1	1	0	0	COX6A1	cytochrome c oxidase subunit VIa polypeptide 1
hsa-miR-1825	1	0	1	1	1	1	EPHB3	EPH receptor B3
hsa-miR-1825	1	0	1	1	0	0	ERH	enhancer of rudimentary homolog (Drosophila)
hsa-miR-1825	1	0	1	1	1	1	NAP1L1	nucleosome assembly protein 1-like 1
hsa-miR-1825	1	0	1	0	1	1	SCN2B	sodium channel, voltage-gated, type II, beta subunit
hsa-miR-1825	1	0	1	1	1	1	SF1	splicing factor 1
hsa-miR-1825	0	0	1	1	0	0	PRY	PTPN13-like, Y-linked
hsa-miR-1825	1	0	1	1	1	1	XPR1	xenotropic and polytropic retrovirus receptor 1
hsa-miR-1825	1	0	1	0	1	1	MAPKAPK2	mitogen-activated protein kinase-activated protein kinase 2
hsa-miR-1825	1	0	1	0	1	1	SEC22B	SEC22 vesicle trafficking protein homolog B (S. cerevisiae) (gene/pseudogene)
hsa-miR-1825	1	0	1	1	1	1	GABRE	gamma-aminobutyric acid (GABA) A receptor, epsilon
hsa-miR-1825	1	0	1	0	1	1	PRKX	protein kinase, X-linked
hsa-miR-1825	1	0	1	0	1	1	SEL1L	sel-1 suppressor of lin-12-like (C. elegans)
hsa-miR-1825	0	0	1	1	1	1	ITGAD	integrin, alpha D
hsa-miR-1825	0	0	1	1	0	0	ARHGEF5	Rho guanine nucleotide exchange factor (GEF) 5
hsa-miR-1825	1	0	1	1	1	1	RND2	Rho family GTPase 2
hsa-miR-1825	1	0	1	1	1	1	GABBR2	gamma-aminobutyric acid (GABA) B receptor, 2
hsa-miR-1825	1	0	1	1	1	1	ABCA1	ATP-binding cassette, sub-family A (ABC1), member 1
hsa-miR-1825	1	0	1	1	1	1	INSIG1	insulin induced gene 1
hsa-miR-1825	1	0	1	1	1	1	LAMC2	laminin, gamma 2
hsa-miR-1825	1	0	1	1	1	1	TERF2	telomeric repeat binding factor 2
hsa-miR-1825	1	0	1	1	1	1	ACTR1A	ARP1 actin-related protein 1 homolog A, centractin alpha (yeast)
hsa-miR-1825	1	0	1	1	1	1	PRKD3	protein kinase D3
hsa-miR-1825	1	0	1	0	1	1	DCAF7	DDB1 and CUL4 associated factor 7
hsa-miR-1825	1	0	1	1	1	1	FOXO4	forkhead box O4
hsa-miR-1825	1	0	1	1	1	1	MTF1	metal-regulatory transcription factor 1
hsa-miR-1825	1	0	1	0	1	1	NAB1	NGFI-A binding protein 1 (EGR1 binding protein 1)
hsa-miR-1825	1	0	1	1	1	1	LIPG	lipase, endothelial
hsa-miR-1825	0	0	1	1	1	1	SMYD5	SMYD family member 5
hsa-miR-1825	1	0	1	1	1	1	DAGLA	diacylglycerol lipase, alpha
hsa-miR-1825	0	0	1	0	1	1	OAS3	2'-5'-oligoadenylate synthetase 3, 100kDa
hsa-miR-1825	1	0	1	1	1	1	PPP2R5E	protein phosphatase 2, regulatory subunit B', epsilon isoform
hsa-miR-1825	1	0	1	1	1	1	PKN2	protein kinase N2
hsa-miR-1825	0	0	1	1	0	0	ANP32A	acidic (leucine-rich) nuclear phosphoprotein 32 family, member A
hsa-miR-1825	1	0	1	1	1	1	TIMM17A	translocase of inner mitochondrial membrane 17 homolog A (yeast)
hsa-miR-1825	0	0	1	1	0	0	IPO7	importin 7
hsa-miR-1825	0	0	1	0	0	0	RELB	v-rel reticuloendotheliosis viral oncogene homolog B
hsa-miR-1825	1	0	1	1	1	1	SLC2A1	solute carrier family 2 (facilitated glucose transporter), member 1
hsa-miR-1825	0	0	1	0	1	1	SLC16A2	solute carrier family 16, member 2 (thyroid hormone transporter)
hsa-miR-1825	1	0	1	0	1	1	IGF2BP1	insulin-like growth factor 2 mRNA binding protein 1
hsa-miR-1825	0	0	1	1	1	1	NES	nestin
hsa-miR-1825	0	0	1	1	0	0	VAMP5	vesicle-associated membrane protein 5 (myobrevin)
hsa-miR-1825	0	0	1	1	1	1	PPP1R17	protein phosphatase 1, regulatory subunit 17
hsa-miR-1825	1	0	1	1	1	1	MMP24	matrix metallopeptidase 24 (membrane-inserted)
hsa-miR-1825	1	0	1	1	1	1	SPIN1	spindlin 1
hsa-miR-1825	1	0	1	1	1	1	BTG2	BTG family, member 2
hsa-miR-1825	1	0	1	0	1	1	SYNGAP1	synaptic Ras GTPase activating protein 1
hsa-miR-1825	1	0	1	1	1	1	ZBTB33	zinc finger and BTB domain containing 33
hsa-miR-1825	1	0	1	1	1	1	RIT1	Ras-like without CAAX 1
hsa-miR-1825	1	0	1	0	1	1	SOX12	SRY (sex determining region Y)-box 12
hsa-miR-1825	1	0	1	0	1	1	WASF2	WAS protein family, member 2
hsa-miR-1825	0	0	1	1	1	1	RTN4	reticulon 4
hsa-miR-1825	1	0	1	1	1	1	ADAMTS5	ADAM metallopeptidase with thrombospondin type 1 motif, 5
hsa-miR-1825	1	0	1	1	1	1	ZNF81	zinc finger protein 81
hsa-miR-1825	1	0	1	1	1	1	VEZF1	vascular endothelial zinc finger 1
hsa-miR-1825	1	0	1	0	1	1	CHP1	calcineurin-like EF hand protein 1
hsa-miR-1825	1	0	1	1	1	1	KLF12	Kruppel-like factor 12
hsa-miR-1825	0	0	1	1	0	0	CYP4F8	cytochrome P450, family 4, subfamily F, polypeptide 8
hsa-miR-1825	1	0	1	1	1	1	CBX3	chromobox homolog 3
hsa-miR-1825	0	0	1	1	1	1	LMOD1	leiomodin 1 (smooth muscle)
hsa-miR-1825	1	0	1	1	1	1	HS2ST1	heparan sulfate 2-O-sulfotransferase 1
hsa-miR-1825	1	0	1	1	1	1	LDOC1	leucine zipper, down-regulated in cancer 1
hsa-miR-1825	0	0	1	0	1	1	PIGN	phosphatidylinositol glycan anchor biosynthesis, class N
hsa-miR-1825	1	0	1	0	1	1	MYCBP	c-myc binding protein
hsa-miR-1825	0	0	1	1	1	1	DNAJC15	DnaJ (Hsp40) homolog, subfamily C, member 15
hsa-miR-1825	0	0	1	1	1	1	SNX10	sorting nexin 10
hsa-miR-1825	0	0	1	1	0	0	GMPPB	GDP-mannose pyrophosphorylase B
hsa-miR-1825	0	0	1	1	0	0	KCNJ14	potassium inwardly-rectifying channel, subfamily J, member 14
hsa-miR-1825	0	0	1	1	1	1	CYTH4	cytohesin 4
hsa-miR-1825	1	0	1	1	1	1	ZBTB43	zinc finger and BTB domain containing 43
hsa-miR-1825	0	0	1	1	1	1	ORMDL2	ORM1-like 2 (S. cerevisiae)
hsa-miR-1825	0	0	1	0	1	1	SCN8A	sodium channel, voltage gated, type VIII, alpha subunit
hsa-miR-1825	0	0	1	0	1	1	AP2A1	adaptor-related protein complex 2, alpha 1 subunit
hsa-miR-1825	0	0	1	1	0	0	PKD2L2	polycystic kidney disease 2-like 2
hsa-miR-1825	0	0	1	1	0	0	UBE2S	ubiquitin-conjugating enzyme E2S
hsa-miR-1825	1	0	1	1	1	1	OTX1	orthodenticle homeobox 1
hsa-miR-1825	1	0	1	1	1	1	KDM4A	lysine (K)-specific demethylase 4A
hsa-miR-1825	1	0	1	0	1	1	EDEM1	ER degradation enhancer, mannosidase alpha-like 1
hsa-miR-1825	0	0	1	1	1	1	VPRBP	Vpr (HIV-1) binding protein
hsa-miR-1825	1	0	1	0	1	1	MLEC	malectin
hsa-miR-1825	1	0	1	1	1	1	RUSC2	RUN and SH3 domain containing 2
hsa-miR-1825	1	0	1	1	1	1	SORCS3	sortilin-related VPS10 domain containing receptor 3
hsa-miR-1825	1	0	1	0	1	1	ZNF609	zinc finger protein 609
hsa-miR-1825	1	0	1	0	1	1	SNX13	sorting nexin 13
hsa-miR-1825	0	0	1	1	1	1	FBXO28	F-box protein 28
hsa-miR-1825	1	0	1	1	1	1	PLCB1	phospholipase C, beta 1 (phosphoinositide-specific)
hsa-miR-1825	1	0	1	0	1	1	SRGAP2	SLIT-ROBO Rho GTPase activating protein 2
hsa-miR-1825	1	0	1	1	1	1	DSTYK	dual serine/threonine and tyrosine protein kinase
hsa-miR-1825	1	0	1	1	1	1	MOB4	MOB family member 4, phocein
hsa-miR-1825	1	0	1	1	1	1	CNOT6	CCR4-NOT transcription complex, subunit 6
hsa-miR-1825	1	0	1	1	1	1	PHF19	PHD finger protein 19
hsa-miR-1825	1	0	1	0	1	1	RRM2B	ribonucleotide reductase M2 B (TP53 inducible)
hsa-miR-1825	1	0	1	1	0	0	COL5A3	collagen, type V, alpha 3
hsa-miR-1825	1	0	1	0	1	1	CNR1	cannabinoid receptor 1 (brain)
hsa-miR-1825	1	0	1	1	1	1	VGLL3	vestigial like 3 (Drosophila)
hsa-miR-1825	1	0	1	1	1	1	NLK	nemo-like kinase
hsa-miR-1825	1	0	1	0	1	1	HPCAL4	hippocalcin like 4
hsa-miR-1825	0	0	1	1	1	1	WBP11	WW domain binding protein 11
hsa-miR-1825	1	0	1	1	1	1	PHF20	PHD finger protein 20
hsa-miR-1825	1	0	1	0	1	1	CRIM1	cysteine rich transmembrane BMP regulator 1 (chordin-like)
hsa-miR-1825	0	0	1	1	0	0	NCKIPSD	NCK interacting protein with SH3 domain
hsa-miR-1825	0	0	1	1	1	1	SMG6	smg-6 homolog, nonsense mediated mRNA decay factor (C. elegans)
hsa-miR-1825	0	0	1	0	1	1	TRIM44	tripartite motif containing 44
hsa-miR-1825	0	0	1	0	1	1	VEZT	vezatin, adherens junctions transmembrane protein
hsa-miR-1825	1	0	1	0	1	1	EIF2C4	eukaryotic translation initiation factor 2C, 4
hsa-miR-1825	1	0	1	1	0	0	INO80D	INO80 complex subunit D
hsa-miR-1825	1	0	1	0	1	1	CHD7	chromodomain helicase DNA binding protein 7
hsa-miR-1825	1	0	1	1	1	1	FBXO34	F-box protein 34
hsa-miR-1825	1	0	1	1	1	1	IFT57	intraflagellar transport 57 homolog (Chlamydomonas)
hsa-miR-1825	0	0	1	1	0	0	GPN2	GPN-loop GTPase 2
hsa-miR-1825	1	0	1	1	1	1	FIGN	fidgetin
hsa-miR-1825	0	0	1	1	1	1	TRIM62	tripartite motif containing 62
hsa-miR-1825	1	0	1	0	1	1	LRP1B	low density lipoprotein receptor-related protein 1B
hsa-miR-1825	1	0	1	1	1	1	STRADB	STE20-related kinase adaptor beta
hsa-miR-1825	1	0	1	1	1	1	MLL5	myeloid/lymphoid or mixed-lineage leukemia 5 (trithorax homolog, Drosophila)
hsa-miR-1825	1	0	1	1	0	0	HOXC5	homeobox C5
hsa-miR-1825	1	0	1	0	1	1	FAM190B	family with sequence similarity 190, member B
hsa-miR-1825	1	0	1	1	0	0	SEMA3G	sema domain, immunoglobulin domain (Ig), short basic domain, secreted, (semaphorin) 3G
hsa-miR-1825	0	0	1	1	1	1	RALGAPA2	Ral GTPase activating protein, alpha subunit 2 (catalytic)
hsa-miR-1825	1	0	1	1	0	0	THAP11	THAP domain containing 11
hsa-miR-1825	1	0	1	0	1	1	ADCY2	adenylate cyclase 2 (brain)
hsa-miR-1825	1	0	1	1	0	0	JPH3	junctophilin 3
hsa-miR-1825	1	0	1	1	1	1	SLC24A3	solute carrier family 24 (sodium/potassium/calcium exchanger), member 3
hsa-miR-1825	1	0	1	0	1	1	NUFIP2	nuclear fragile X mental retardation protein interacting protein 2
hsa-miR-1825	1	0	1	1	1	1	NCEH1	neutral cholesterol ester hydrolase 1
hsa-miR-1825	0	0	1	1	1	1	ARRDC3	arrestin domain containing 3
hsa-miR-1825	1	0	1	1	1	1	PCDH10	protocadherin 10
hsa-miR-1825	1	0	1	0	1	1	RAP2A	RAP2A, member of RAS oncogene family
hsa-miR-1825	1	0	1	1	1	1	HCN1	hyperpolarization activated cyclic nucleotide-gated potassium channel 1
hsa-miR-1825	0	0	1	1	1	1	RNASEL	ribonuclease L (2',5'-oligoisoadenylate synthetase-dependent)
hsa-miR-1825	1	0	1	1	1	1	C6orf47	chromosome 6 open reading frame 47
hsa-miR-1825	0	0	1	1	1	1	CHST6	carbohydrate (N-acetylglucosamine 6-O) sulfotransferase 6
hsa-miR-1825	0	0	1	0	1	1	CFL2	cofilin 2 (muscle)
hsa-miR-1825	1	0	1	1	1	1	DHX35	DEAH (Asp-Glu-Ala-His) box polypeptide 35
hsa-miR-1825	1	0	1	0	1	1	CSNK1G1	casein kinase 1, gamma 1
hsa-miR-1825	1	0	1	1	1	1	GPR88	G protein-coupled receptor 88
hsa-miR-1825	0	0	1	1	0	0	POPDC2	popeye domain containing 2
hsa-miR-1825	1	0	1	1	1	1	XYLT2	xylosyltransferase II
hsa-miR-1825	1	0	1	1	1	1	ABCG4	ATP-binding cassette, sub-family G (WHITE), member 4
hsa-miR-1825	0	0	1	1	1	1	TCTA	T-cell leukemia translocation altered
hsa-miR-1825	0	0	1	1	1	1	HHIP	hedgehog interacting protein
hsa-miR-1825	0	0	1	1	1	1	SFXN1	sideroflexin 1
hsa-miR-1825	1	0	1	1	0	0	UBE2Z	ubiquitin-conjugating enzyme E2Z
hsa-miR-1825	1	0	1	1	1	1	FAM134A	family with sequence similarity 134, member A
hsa-miR-1825	1	0	1	1	1	1	GNPTAB	N-acetylglucosamine-1-phosphate transferase, alpha and beta subunits
hsa-miR-1825	0	0	1	1	1	1	PDYN	prodynorphin
hsa-miR-1825	1	0	1	1	1	1	C10orf76	chromosome 10 open reading frame 76
hsa-miR-1825	0	0	1	1	1	1	GLT25D1	glycosyltransferase 25 domain containing 1
hsa-miR-1825	0	0	1	0	1	1	C1orf115	chromosome 1 open reading frame 115
hsa-miR-1825	0	0	1	1	1	1	ZBTB3	zinc finger and BTB domain containing 3
hsa-miR-1825	0	0	1	1	1	1	TREML2	triggering receptor expressed on myeloid cells-like 2
hsa-miR-1825	1	0	1	0	1	1	MAGIX	MAGI family member, X-linked
hsa-miR-1825	1	0	1	1	1	1	KLHL18	kelch-like 18 (Drosophila)
hsa-miR-1825	0	0	1	1	0	0	BAIAP2L2	BAI1-associated protein 2-like 2
hsa-miR-1825	0	0	1	1	1	1	ITIH5	inter-alpha-trypsin inhibitor heavy chain family, member 5
hsa-miR-1825	1	0	1	0	1	1	C1orf21	chromosome 1 open reading frame 21
hsa-miR-1825	0	0	1	1	1	1	SPACA1	sperm acrosome associated 1
hsa-miR-1825	0	0	1	1	1	1	ARPC5L	actin related protein 2/3 complex, subunit 5-like
hsa-miR-1825	1	0	1	1	1	1	RAB1B	RAB1B, member RAS oncogene family
hsa-miR-1825	1	0	1	1	1	1	CABLES2	Cdk5 and Abl enzyme substrate 2
hsa-miR-1825	1	0	1	1	1	1	SESN2	sestrin 2
hsa-miR-1825	1	0	1	0	1	1	ITCH	itchy E3 ubiquitin protein ligase
hsa-miR-1825	0	0	1	1	1	1	FRMD8	FERM domain containing 8
hsa-miR-1825	1	0	1	1	1	1	GPR61	G protein-coupled receptor 61
hsa-miR-1825	1	0	1	1	1	1	DSEL	dermatan sulfate epimerase-like
hsa-miR-1825	0	0	1	1	1	1	ACAD11	acyl-CoA dehydrogenase family, member 11
hsa-miR-1825	1	0	1	1	1	1	FAM175B	family with sequence similarity 175, member B
hsa-miR-1825	1	0	1	1	1	1	CAMKK1	calcium/calmodulin-dependent protein kinase kinase 1, alpha
hsa-miR-1825	0	0	1	1	0	0	CFC1	cripto, FRL-1, cryptic family 1
hsa-miR-1825	1	0	1	1	1	1	USP38	ubiquitin specific peptidase 38
hsa-miR-1825	1	0	1	1	1	1	GPR124	G protein-coupled receptor 124
hsa-miR-1825	0	0	1	0	1	1	CBR4	carbonyl reductase 4
hsa-miR-1825	1	0	1	1	0	0	ZC3H10	zinc finger CCCH-type containing 10
hsa-miR-1825	1	0	1	1	1	1	ABHD13	abhydrolase domain containing 13
hsa-miR-1825	1	0	1	1	0	0	ATG4D	autophagy related 4D, cysteine peptidase
hsa-miR-1825	1	0	1	0	1	1	C5orf62	chromosome 5 open reading frame 62
hsa-miR-1825	1	0	1	1	1	1	TRIM55	tripartite motif containing 55
hsa-miR-1825	1	0	1	1	0	0	DMRTB1	DMRT-like family B with proline-rich C-terminal, 1
hsa-miR-1825	1	0	1	1	1	1	C5orf30	chromosome 5 open reading frame 30
hsa-miR-1825	0	0	1	1	0	0	SIGLEC11	sialic acid binding Ig-like lectin 11
hsa-miR-1825	1	0	1	1	1	1	MAL2	mal, T-cell differentiation protein 2 (gene/pseudogene)
hsa-miR-1825	1	0	1	0	1	1	TMEM123	transmembrane protein 123
hsa-miR-1825	1	0	1	0	1	1	FAM129A	family with sequence similarity 129, member A
hsa-miR-1825	1	0	1	1	1	1	NAA15	N(alpha)-acetyltransferase 15, NatA auxiliary subunit
hsa-miR-1825	0	0	1	1	0	0	S100A16	S100 calcium binding protein A16
hsa-miR-1825	0	0	1	1	0	0	DYNLL2	dynein, light chain, LC8-type 2
hsa-miR-1825	0	0	1	1	1	1	ZNF431	zinc finger protein 431
hsa-miR-1825	1	0	1	1	0	0	PKDCC	protein kinase domain containing, cytoplasmic homolog (mouse)
hsa-miR-1825	1	0	1	0	1	1	NUS1	nuclear undecaprenyl pyrophosphate synthase 1 homolog (S. cerevisiae)
hsa-miR-1825	0	0	1	1	1	1	C1orf213	chromosome 1 open reading frame 213
hsa-miR-1825	0	0	1	1	1	1	KLF14	Kruppel-like factor 14
hsa-miR-1825	1	0	1	0	1	1	GIT2	G protein-coupled receptor kinase interacting ArfGAP 2
hsa-miR-1825	1	0	1	1	1	1	LGI3	leucine-rich repeat LGI family, member 3
hsa-miR-1825	1	0	1	1	1	1	MAX	MYC associated factor X
hsa-miR-1825	1	0	1	0	1	1	ZBTB47	zinc finger and BTB domain containing 47
hsa-miR-1825	0	0	1	1	1	1	C7orf33	chromosome 7 open reading frame 33
hsa-miR-1825	0	0	1	1	0	0	TMEM217	transmembrane protein 217
hsa-miR-1825	1	0	1	1	1	1	LSM12	LSM12 homolog (S. cerevisiae)
hsa-miR-1825	1	0	1	1	1	1	FAM123B	family with sequence similarity 123B
hsa-miR-1825	0	0	1	1	1	1	RNF217	ring finger protein 217
hsa-miR-1825	0	0	1	1	0	0	DOK6	docking protein 6
hsa-miR-1825	1	0	1	1	1	1	HEPACAM	hepatic and glial cell adhesion molecule
hsa-miR-1825	1	0	1	0	1	1	ZBTB9	zinc finger and BTB domain containing 9
hsa-miR-1825	0	0	1	1	1	1	CNPY4	canopy 4 homolog (zebrafish)
hsa-miR-1825	0	0	1	1	1	1	FBLN7	fibulin 7
hsa-miR-1825	0	0	1	0	1	1	TMEM92	transmembrane protein 92
hsa-miR-1825	0	0	1	0	1	1	VGLL2	vestigial like 2 (Drosophila)
hsa-miR-1825	1	0	1	1	1	1	FNDC5	fibronectin type III domain containing 5
hsa-miR-1825	0	0	1	1	0	0	CSF3R	colony stimulating factor 3 receptor (granulocyte)
hsa-miR-1825	1	0	1	1	1	1	RC3H1	ring finger and CCCH-type domains 1
hsa-miR-1825	0	0	1	1	1	1	TAPBP	TAP binding protein (tapasin)
hsa-miR-1825	1	0	1	1	1	1	AQP11	aquaporin 11
hsa-miR-1825	0	0	1	1	1	1	KLF17	Kruppel-like factor 17
hsa-miR-1825	1	0	1	0	1	1	C3orf58	chromosome 3 open reading frame 58
hsa-miR-1825	1	0	1	0	1	1	PGM2L1	phosphoglucomutase 2-like 1
hsa-miR-1825	1	0	1	0	1	1	KSR2	kinase suppressor of ras 2
hsa-miR-1825	1	0	1	0	1	1	FAM84B	family with sequence similarity 84, member B
hsa-miR-1825	1	0	1	1	1	1	UBR1	ubiquitin protein ligase E3 component n-recognin 1
hsa-miR-1825	0	0	1	1	1	1	ZDHHC22	zinc finger, DHHC-type containing 22
hsa-miR-1825	0	0	1	1	0	0	SEC14L4	SEC14-like 4 (S. cerevisiae)
hsa-miR-1825	0	0	1	1	0	0	IL9R	interleukin 9 receptor
hsa-miR-1825	0	0	1	1	1	1	MRPL43	mitochondrial ribosomal protein L43
hsa-miR-1825	1	0	1	1	1	1	PRIMA1	proline rich membrane anchor 1
hsa-miR-1825	1	0	1	1	1	1	MARCH3	membrane-associated ring finger (C3HC4) 3, E3 ubiquitin protein ligase
hsa-miR-1825	1	0	1	1	1	1	RNF180	ring finger protein 180
hsa-miR-1825	0	0	1	1	1	1	LYRM7	Lyrm7 homolog (mouse)
hsa-miR-1825	1	0	1	1	1	1	BCL9L	B-cell CLL/lymphoma 9-like
hsa-miR-1825	1	0	1	1	0	0	FAM100B	family with sequence similarity 100, member B
hsa-miR-1825	1	0	1	1	1	1	SPTY2D1	SPT2, Suppressor of Ty, domain containing 1 (S. cerevisiae)
hsa-miR-1825	1	0	1	0	1	1	NRK	Nik related kinase
hsa-miR-1825	1	0	1	0	1	1	ZC3H6	zinc finger CCCH-type containing 6
hsa-miR-1825	1	0	1	0	0	0	RAB15	RAB15, member RAS oncogene family
hsa-miR-1825	0	0	1	1	0	0	C9orf169	chromosome 9 open reading frame 169
hsa-miR-1825	1	0	1	1	1	1	GLYAT	glycine-N-acyltransferase
hsa-miR-1825	0	0	1	1	0	0	IQCF2	IQ motif containing F2
hsa-miR-1825	1	0	1	1	1	1	ENSA	endosulfine alpha
hsa-miR-1825	1	0	1	1	1	1	ATRNL1	attractin-like 1
hsa-miR-1825	1	0	1	1	1	1	TEX19	testis expressed 19
hsa-miR-1825	0	0	1	1	1	1	DFFA	DNA fragmentation factor, 45kDa, alpha polypeptide
hsa-miR-1825	0	0	1	0	0	0	PPIAP29	peptidylprolyl isomerase A (cyclophilin A) pseudogene 29
hsa-miR-1825	0	0	1	0	0	0	ESRRAP2	estrogen-related receptor alpha pseudogene 2
hsa-miR-1825	0	0	1	0	0	0	MIR155HG	MIR155 host gene (non-protein coding)
hsa-miR-1825	0	0	1	0	0	0	TTTY23	testis-specific transcript, Y-linked 23 (non-protein coding)
hsa-miR-1825	0	0	1	0	0	0	DKFZP586I1420	uncharacterized protein DKFZp586I1420
hsa-miR-1825	0	0	1	0	0	0	TPI1P2	triosephosphate isomerase 1 pseudogene 2
hsa-miR-1825	0	0	1	0	0	0	GOLGA2P3Y	golgin A2 pseudogene 3, Y-linked
hsa-miR-1825	0	0	1	0	0	0	CDH12P2	cadherin 12 (N-cadherin 2) pseudogene 2
hsa-miR-1825	0	0	1	0	0	0	COX6B1P1	cytochrome c oxidase subunit VIb polypeptide 1 (ubiquitous) pseudogene 1
hsa-miR-1825	0	0	1	0	0	0	NXF4	nuclear RNA export factor 4 pseudogene
hsa-miR-1825	0	0	1	0	0	0	AQP7P1	aquaporin 7 pseudogene 1
hsa-miR-1825	0	0	1	0	0	0	SIGLEC16	sialic acid binding Ig-like lectin 16 (gene/pseudogene)
hsa-miR-1825	0	0	1	0	0	0	SNORA74B	small nucleolar RNA, H/ACA box 74B
hsa-miR-1825	0	0	1	0	0	0	PYY2	peptide YY, 2 (pseudogene)
hsa-miR-1825	0	0	1	0	0	0	SNORD114-26	small nucleolar RNA, C/D box 114-26
hsa-miR-1825	1	0	1	1	1	1	MLL	myeloid/lymphoid or mixed-lineage leukemia (trithorax homolog, Drosophila)
hsa-miR-1825	1	0	1	1	0	0	TNXB	tenascin XB
hsa-miR-1825	1	0	1	1	1	1	ATF6B	activating transcription factor 6 beta
hsa-miR-1825	0	0	1	1	1	1	BBS9	Bardet-Biedl syndrome 9
hsa-miR-1825	0	0	1	1	1	1	CD6	CD6 molecule
