# Supplementary material for: Profiling of Selected MicroRNAs in Proliferative Eutopic Endometrium of Women with Ovarian Endometriosis
Source: Biomed Res Int. 2015 Aug 20;2015:760698. doi: 10.1155/2015/760698 (PMC4558423; doi:10.1155/2015/760698)
Supplement: Supplementary file 1 — Table I: The names of miRNAs significantly differentially expressed between eutopic endometrium of patients with endometriosis vs eutopic endometrium of patients without endometriosis. Table II: The associations between miRNA and mRNA, which presents detailed results of the search of six major databases i.e targetscan, tarbase, miranda, mirbase, mirtarget2 and pictar. [file 760698.f1.zip › 760698.f1/Table II/hsa-miR-1827.tsv]

miR	targetscan	tarbase	miranda	mirbase	mirtarget2	pictar	GeneSymbol	GeneName
hsa-miR-1827	1	0	1	1	0	0	SRCAP	Snf2-related CREBBP activator protein
hsa-miR-1827	1	0	1	0	0	0	TRANK1	tetratricopeptide repeat and ankyrin repeat containing 1
hsa-miR-1827	0	0	1	1	1	1	PPIP5K1	diphosphoinositol pentakisphosphate kinase 1
hsa-miR-1827	1	0	1	1	1	1	DAAM2	dishevelled associated activator of morphogenesis 2
hsa-miR-1827	1	0	1	1	1	1	ITM2C	integral membrane protein 2C
hsa-miR-1827	1	0	1	1	1	1	ABCC5	ATP-binding cassette, sub-family C (CFTR/MRP), member 5
hsa-miR-1827	1	0	1	0	1	1	PTPRT	protein tyrosine phosphatase, receptor type, T
hsa-miR-1827	0	0	1	1	1	1	C2CD2L	C2CD2-like
hsa-miR-1827	0	0	1	1	0	0	PLXNB1	plexin B1
hsa-miR-1827	1	0	1	0	1	1	MTSS1	metastasis suppressor 1
hsa-miR-1827	0	0	1	1	1	1	PREPL	prolyl endopeptidase-like
hsa-miR-1827	1	0	1	1	1	1	CDC42BPA	CDC42 binding protein kinase alpha (DMPK-like)
hsa-miR-1827	0	0	1	1	1	1	PDE4DIP	phosphodiesterase 4D interacting protein
hsa-miR-1827	0	0	1	1	0	0	RAP1GAP	RAP1 GTPase activating protein
hsa-miR-1827	1	0	1	0	1	1	CEP350	centrosomal protein 350kDa
hsa-miR-1827	0	0	1	0	0	0	FAM91A2	family with sequence similarity 91, member A2
hsa-miR-1827	1	0	1	1	1	1	IQSEC2	IQ motif and Sec7 domain 2
hsa-miR-1827	1	0	1	1	1	1	GPATCH8	G patch domain containing 8
hsa-miR-1827	1	0	1	1	0	0	PCLO	piccolo (presynaptic cytomatrix protein)
hsa-miR-1827	0	0	1	1	1	1	PHLDB1	pleckstrin homology-like domain, family B, member 1
hsa-miR-1827	1	0	1	1	1	1	GIGYF2	GRB10 interacting GYF protein 2
hsa-miR-1827	0	0	1	1	1	1	CLUAP1	clusterin associated protein 1
hsa-miR-1827	1	0	1	1	1	1	PPP6R2	protein phosphatase 6, regulatory subunit 2
hsa-miR-1827	1	0	1	0	1	1	MAGI2	membrane associated guanylate kinase, WW and PDZ domain containing 2
hsa-miR-1827	0	0	1	1	0	0	ATP10B	ATPase, class V, type 10B
hsa-miR-1827	1	0	1	0	1	1	RBM12	RNA binding motif protein 12
hsa-miR-1827	1	0	1	1	1	1	CPEB3	cytoplasmic polyadenylation element binding protein 3
hsa-miR-1827	0	0	1	0	0	0	THSD7A	thrombospondin, type I, domain containing 7A
hsa-miR-1827	0	0	1	1	0	0	FAM149B1	family with sequence similarity 149, member B1
hsa-miR-1827	1	0	1	1	1	1	RPGRIP1L	RPGRIP1-like
hsa-miR-1827	0	0	1	0	1	1	TP53TG3	TP53 target 3
hsa-miR-1827	0	0	1	0	0	0	TP53TG3B	TP53 target 3B
hsa-miR-1827	1	0	1	1	0	0	KIAA1045	KIAA1045
hsa-miR-1827	1	0	1	1	1	1	PHF8	PHD finger protein 8
hsa-miR-1827	1	0	1	0	1	1	SRGAP3	SLIT-ROBO Rho GTPase activating protein 3
hsa-miR-1827	0	0	1	1	0	0	ZC4H2	zinc finger, C4H2 domain containing
hsa-miR-1827	1	0	1	1	0	0	KIAA1210	KIAA1210
hsa-miR-1827	1	0	1	1	1	1	STK36	serine/threonine kinase 36
hsa-miR-1827	0	0	1	1	1	1	COPS7A	COP9 constitutive photomorphogenic homolog subunit 7A (Arabidopsis)
hsa-miR-1827	0	0	1	1	0	0	TNFRSF12A	tumor necrosis factor receptor superfamily, member 12A
hsa-miR-1827	1	0	1	1	1	1	PCDH19	protocadherin 19
hsa-miR-1827	1	0	1	1	1	1	LRRC7	leucine rich repeat containing 7
hsa-miR-1827	1	0	1	1	1	1	SEMA6A	sema domain, transmembrane domain (TM), and cytoplasmic domain, (semaphorin) 6A
hsa-miR-1827	1	0	1	1	0	0	CARNS1	carnosine synthase 1
hsa-miR-1827	0	0	1	0	1	1	MUC3B	mucin 3B, cell surface associated
hsa-miR-1827	0	0	1	1	0	0	POLR3E	polymerase (RNA) III (DNA directed) polypeptide E (80kD)
hsa-miR-1827	0	0	1	0	0	0	COL20A1	collagen, type XX, alpha 1
hsa-miR-1827	1	0	1	1	0	0	ZSWIM5	zinc finger, SWIM-type containing 5
hsa-miR-1827	1	0	1	1	1	1	USP28	ubiquitin specific peptidase 28
hsa-miR-1827	1	0	1	1	0	0	NCKAP5L	NCK-associated protein 5-like
hsa-miR-1827	1	0	1	0	0	0	TANC2	tetratricopeptide repeat, ankyrin repeat and coiled-coil containing 2
hsa-miR-1827	0	0	1	0	0	0	LOC440792	proline dehydrogenase (oxidase) 1 pseudogene
hsa-miR-1827	1	0	1	1	0	0	TMCO7	transmembrane and coiled-coil domains 7
hsa-miR-1827	0	0	1	0	1	1	SETD5	SET domain containing 5
hsa-miR-1827	1	0	1	1	1	1	IKZF4	IKAROS family zinc finger 4 (Eos)
hsa-miR-1827	0	0	1	1	1	1	UNC80	unc-80 homolog (C. elegans)
hsa-miR-1827	0	0	1	1	0	0	NTNG2	netrin G2
hsa-miR-1827	0	0	1	0	0	0	MYSM1	Myb-like, SWIRM and MPN domains 1
hsa-miR-1827	0	0	1	1	1	1	LENG8	leukocyte receptor cluster (LRC) member 8
hsa-miR-1827	1	0	1	0	1	1	KIF5C	kinesin family member 5C
hsa-miR-1827	0	0	1	0	0	0	NBLA00301	Nbla00301
hsa-miR-1827	1	0	1	1	0	0	ADC	arginine decarboxylase
hsa-miR-1827	1	0	1	1	1	1	SH3TC2	SH3 domain and tetratricopeptide repeats 2
hsa-miR-1827	0	0	1	1	0	0	CIRH1A	cirrhosis, autosomal recessive 1A (cirhin)
hsa-miR-1827	1	0	1	0	0	0	RNF169	ring finger protein 169
hsa-miR-1827	0	0	1	1	1	1	NELL1	NEL-like 1 (chicken)
hsa-miR-1827	0	0	1	1	1	1	PDZD3	PDZ domain containing 3
hsa-miR-1827	1	0	1	1	1	1	UBR3	ubiquitin protein ligase E3 component n-recognin 3 (putative)
hsa-miR-1827	0	0	1	1	0	0	DDB2	damage-specific DNA binding protein 2, 48kDa
hsa-miR-1827	1	0	1	1	1	1	SLC43A2	solute carrier family 43, member 2
hsa-miR-1827	1	1	1	1	1	1	BACE1	beta-site APP-cleaving enzyme 1
hsa-miR-1827	1	0	1	1	1	1	NRXN2	neurexin 2
hsa-miR-1827	1	0	1	1	1	1	KLHL5	kelch-like 5 (Drosophila)
hsa-miR-1827	1	0	1	1	1	1	VLDLR	very low density lipoprotein receptor
hsa-miR-1827	1	0	1	1	1	1	SHC1	SHC (Src homology 2 domain containing) transforming protein 1
hsa-miR-1827	1	0	1	1	1	1	OSBPL7	oxysterol binding protein-like 7
hsa-miR-1827	1	0	1	1	1	1	BACH2	BTB and CNC homology 1, basic leucine zipper transcription factor 2
hsa-miR-1827	1	0	1	0	1	1	PCDHA13	protocadherin alpha 13
hsa-miR-1827	1	0	1	1	1	1	PCDHA4	protocadherin alpha 4
hsa-miR-1827	1	0	1	1	0	0	ELN	elastin
hsa-miR-1827	1	0	1	1	1	1	PML	promyelocytic leukemia
hsa-miR-1827	0	0	1	0	1	1	DCAF11	DDB1 and CUL4 associated factor 11
hsa-miR-1827	1	0	1	1	1	1	SLC8A1	solute carrier family 8 (sodium/calcium exchanger), member 1
hsa-miR-1827	1	0	1	1	1	1	EIF4G3	eukaryotic translation initiation factor 4 gamma, 3
hsa-miR-1827	1	0	1	1	0	0	ADAM15	ADAM metallopeptidase domain 15
hsa-miR-1827	1	0	1	0	1	1	MPPED2	metallophosphoesterase domain containing 2
hsa-miR-1827	1	0	1	1	0	0	CACNB1	calcium channel, voltage-dependent, beta 1 subunit
hsa-miR-1827	1	0	1	1	0	0	TSPYL2	TSPY-like 2
hsa-miR-1827	1	0	1	1	1	1	FMR1	fragile X mental retardation 1
hsa-miR-1827	1	0	1	1	1	1	ERF	Ets2 repressor factor
hsa-miR-1827	1	0	1	1	1	1	AEBP2	AE binding protein 2
hsa-miR-1827	1	0	1	0	1	1	CDON	Cdon homolog (mouse)
hsa-miR-1827	1	0	1	1	1	1	ANK1	ankyrin 1, erythrocytic
hsa-miR-1827	0	0	1	1	1	1	RYR1	ryanodine receptor 1 (skeletal)
hsa-miR-1827	1	0	1	1	1	1	RASSF4	Ras association (RalGDS/AF-6) domain family member 4
hsa-miR-1827	0	0	1	1	1	1	HLA-DQA1	major histocompatibility complex, class II, DQ alpha 1
hsa-miR-1827	1	0	1	1	0	0	SYN3	synapsin III
hsa-miR-1827	0	0	1	1	0	0	SLC22A8	solute carrier family 22 (organic anion transporter), member 8
hsa-miR-1827	1	0	1	1	1	1	TEAD1	TEA domain family member 1 (SV40 transcriptional enhancer factor)
hsa-miR-1827	0	0	1	1	0	0	MSH5	mutS homolog 5 (E. coli)
hsa-miR-1827	0	0	1	1	1	1	SGSH	N-sulfoglucosamine sulfohydrolase
hsa-miR-1827	1	0	1	0	1	1	CAV1	caveolin 1, caveolae protein, 22kDa
hsa-miR-1827	1	0	1	0	1	1	PDE7B	phosphodiesterase 7B
hsa-miR-1827	1	0	1	1	1	1	MEF2D	myocyte enhancer factor 2D
hsa-miR-1827	1	0	1	1	1	1	PICALM	phosphatidylinositol binding clathrin assembly protein
hsa-miR-1827	0	0	1	1	1	1	CELF1	CUGBP, Elav-like family member 1
hsa-miR-1827	0	0	1	0	0	0	TRPC2	transient receptor potential cation channel, subfamily C, member 2, pseudogene
hsa-miR-1827	1	0	1	1	1	1	STX16	syntaxin 16
hsa-miR-1827	1	0	1	1	1	1	CBFA2T2	core-binding factor, runt domain, alpha subunit 2; translocated to, 2
hsa-miR-1827	0	0	1	1	1	1	MFSD11	major facilitator superfamily domain containing 11
hsa-miR-1827	0	0	1	0	0	0	ALOX12P2	arachidonate 12-lipoxygenase pseudogene 2
hsa-miR-1827	0	0	1	1	0	0	SPTBN2	spectrin, beta, non-erythrocytic 2
hsa-miR-1827	1	0	1	1	1	1	PCDH17	protocadherin 17
hsa-miR-1827	1	0	1	1	1	1	TMBIM6	transmembrane BAX inhibitor motif containing 6
hsa-miR-1827	0	0	1	1	1	1	SESN1	sestrin 1
hsa-miR-1827	0	0	1	0	1	1	C9orf91	chromosome 9 open reading frame 91
hsa-miR-1827	1	0	1	0	0	0	MAP3K1	mitogen-activated protein kinase kinase kinase 1, E3 ubiquitin protein ligase
hsa-miR-1827	0	0	1	1	1	1	CREB3L1	cAMP responsive element binding protein 3-like 1
hsa-miR-1827	1	0	1	1	1	1	CTNND1	catenin (cadherin-associated protein), delta 1
hsa-miR-1827	1	0	1	1	0	0	PAK1	p21 protein (Cdc42/Rac)-activated kinase 1
hsa-miR-1827	0	0	1	1	1	1	SSBP2	single-stranded DNA binding protein 2
hsa-miR-1827	0	0	1	1	0	0	CARD10	caspase recruitment domain family, member 10
hsa-miR-1827	0	0	1	1	1	1	GNAS	GNAS complex locus
hsa-miR-1827	1	0	1	0	1	1	CELF2	CUGBP, Elav-like family member 2
hsa-miR-1827	0	0	1	1	1	1	PCBP4	poly(rC) binding protein 4
hsa-miR-1827	0	0	1	1	1	1	PLEKHB1	pleckstrin homology domain containing, family B (evectins) member 1
hsa-miR-1827	1	0	1	0	1	1	MAP4K4	mitogen-activated protein kinase kinase kinase kinase 4
hsa-miR-1827	1	0	1	1	1	1	GLS	glutaminase
hsa-miR-1827	1	0	1	0	0	0	PPME1	protein phosphatase methylesterase 1
hsa-miR-1827	0	0	1	1	1	1	DMRT2	doublesex and mab-3 related transcription factor 2
hsa-miR-1827	1	0	1	0	1	1	FAM19A5	family with sequence similarity 19 (chemokine (C-C motif)-like), member A5
hsa-miR-1827	1	0	1	1	1	1	SCHIP1	schwannomin interacting protein 1
hsa-miR-1827	1	0	1	1	1	1	HMG20A	high mobility group 20A
hsa-miR-1827	1	0	1	1	1	1	C14orf129	chromosome 14 open reading frame 129
hsa-miR-1827	0	0	1	1	1	1	CNPPD1	cyclin Pas1/PHO80 domain containing 1
hsa-miR-1827	0	0	1	0	1	1	CLDN2	claudin 2
hsa-miR-1827	1	0	1	1	1	1	SNPH	syntaphilin
hsa-miR-1827	1	0	1	1	0	0	ECE2	endothelin converting enzyme 2
hsa-miR-1827	0	0	1	1	1	1	CHRD	chordin
hsa-miR-1827	1	0	1	1	1	1	SYDE1	synapse defective 1, Rho GTPase, homolog 1 (C. elegans)
hsa-miR-1827	0	0	1	1	1	1	SPG21	spastic paraplegia 21 (autosomal recessive, Mast syndrome)
hsa-miR-1827	0	0	1	1	1	1	MFF	mitochondrial fission factor
hsa-miR-1827	1	0	1	1	0	0	TDRKH	tudor and KH domain containing
hsa-miR-1827	1	0	1	1	1	1	DESI2	desumoylating isopeptidase 2
hsa-miR-1827	0	0	1	1	1	1	CHST12	carbohydrate (chondroitin 4) sulfotransferase 12
hsa-miR-1827	1	0	1	1	1	1	STRN3	striatin, calmodulin binding protein 3
hsa-miR-1827	1	0	1	1	1	1	ELF2	E74-like factor 2 (ets domain transcription factor)
hsa-miR-1827	0	0	1	1	0	0	GHRHR	growth hormone releasing hormone receptor
hsa-miR-1827	1	0	1	1	1	1	TMUB2	transmembrane and ubiquitin-like domain containing 2
hsa-miR-1827	1	0	1	1	1	1	DCLRE1B	DNA cross-link repair 1B
hsa-miR-1827	0	0	1	0	1	1	KANSL3	KAT8 regulatory NSL complex subunit 3
hsa-miR-1827	1	0	1	1	1	1	VEGFA	vascular endothelial growth factor A
hsa-miR-1827	1	0	1	1	0	0	RAB34	RAB34, member RAS oncogene family
hsa-miR-1827	1	0	1	1	1	1	LETMD1	LETM1 domain containing 1
hsa-miR-1827	0	0	1	1	0	0	FEZF2	FEZ family zinc finger 2
hsa-miR-1827	0	0	1	1	0	0	ZAN	zonadhesin
hsa-miR-1827	1	0	1	1	1	1	BBC3	BCL2 binding component 3
hsa-miR-1827	1	0	1	1	1	1	RGS10	regulator of G-protein signaling 10
hsa-miR-1827	1	0	1	1	1	1	CALCOCO1	calcium binding and coiled-coil domain 1
hsa-miR-1827	0	0	1	0	1	1	MYO3B	myosin IIIB
hsa-miR-1827	0	0	1	1	0	0	SNRPN	small nuclear ribonucleoprotein polypeptide N
hsa-miR-1827	0	0	1	1	1	1	TTC23	tetratricopeptide repeat domain 23
hsa-miR-1827	1	0	1	1	1	1	ST3GAL3	ST3 beta-galactoside alpha-2,3-sialyltransferase 3
hsa-miR-1827	0	0	1	0	1	1	LYPD6B	LY6/PLAUR domain containing 6B
hsa-miR-1827	0	0	1	1	0	0	RASGEF1C	RasGEF domain family, member 1C
hsa-miR-1827	0	0	1	0	1	1	EPM2A	epilepsy, progressive myoclonus type 2A, Lafora disease (laforin)
hsa-miR-1827	1	0	1	1	0	0	FOXP2	forkhead box P2
hsa-miR-1827	1	0	1	1	1	1	CACNB2	calcium channel, voltage-dependent, beta 2 subunit
hsa-miR-1827	1	0	1	0	1	1	TXLNA	taxilin alpha
hsa-miR-1827	1	0	1	1	0	0	BRSK2	BR serine/threonine kinase 2
hsa-miR-1827	1	0	1	1	1	1	AFF2	AF4/FMR2 family, member 2
hsa-miR-1827	1	0	1	1	1	1	SH2B3	SH2B adaptor protein 3
hsa-miR-1827	1	0	1	0	1	1	CACNA1C	calcium channel, voltage-dependent, L type, alpha 1C subunit
hsa-miR-1827	1	0	1	1	0	0	SEZ6L2	seizure related 6 homolog (mouse)-like 2
hsa-miR-1827	1	0	1	1	1	1	CACNA2D2	calcium channel, voltage-dependent, alpha 2/delta subunit 2
hsa-miR-1827	0	0	1	0	0	0	CACNA2D3	calcium channel, voltage-dependent, alpha 2/delta subunit 3
hsa-miR-1827	0	0	1	1	1	1	DMRTC1	DMRT-like family C1
hsa-miR-1827	0	0	1	1	0	0	DMRTC1B	DMRT-like family C1B
hsa-miR-1827	1	0	1	1	1	1	PALM2	paralemmin 2
hsa-miR-1827	0	0	1	0	0	0	LY6G6E	lymphocyte antigen 6 complex, locus G6E (pseudogene)
hsa-miR-1827	1	0	1	1	1	1	NRXN3	neurexin 3
hsa-miR-1827	0	0	1	1	1	1	TFEB	transcription factor EB
hsa-miR-1827	0	0	1	1	1	1	ESRP1	epithelial splicing regulatory protein 1
hsa-miR-1827	0	0	1	1	0	0	GPRC5C	G protein-coupled receptor, family C, group 5, member C
hsa-miR-1827	1	0	1	1	1	1	AKAP2	A kinase (PRKA) anchor protein 2
hsa-miR-1827	1	0	1	0	1	1	NFAT5	nuclear factor of activated T-cells 5, tonicity-responsive
hsa-miR-1827	1	0	1	1	1	1	TANC1	tetratricopeptide repeat, ankyrin repeat and coiled-coil containing 1
hsa-miR-1827	0	0	1	0	0	0	FLJ20518	FSHD region gene 2 family, member C pseudogene
hsa-miR-1827	0	0	1	0	0	0	TUG1	taurine upregulated 1 (non-protein coding)
hsa-miR-1827	0	0	1	1	1	1	OLFM4	olfactomedin 4
hsa-miR-1827	1	0	1	1	0	0	SENP3	SUMO1/sentrin/SMT3 specific peptidase 3
hsa-miR-1827	1	0	1	1	1	1	ZNF691	zinc finger protein 691
hsa-miR-1827	0	0	1	0	0	0	RNF31	ring finger protein 31
hsa-miR-1827	0	0	1	1	1	1	RNF220	ring finger protein 220
hsa-miR-1827	1	0	1	1	1	1	CADM3	cell adhesion molecule 3
hsa-miR-1827	0	0	1	1	0	0	CARD14	caspase recruitment domain family, member 14
hsa-miR-1827	0	0	1	1	1	1	STAU2	staufen, RNA binding protein, homolog 2 (Drosophila)
hsa-miR-1827	1	0	1	1	1	1	HNRNPUL1	heterogeneous nuclear ribonucleoprotein U-like 1
hsa-miR-1827	1	0	1	1	1	1	HMGN3	high mobility group nucleosomal binding domain 3
hsa-miR-1827	0	0	1	1	0	0	C17orf53	chromosome 17 open reading frame 53
hsa-miR-1827	1	0	1	0	0	0	ZNRF3	zinc and ring finger 3
hsa-miR-1827	0	0	1	0	0	0	DUXAP10	double homeobox A pseudogene 10
hsa-miR-1827	1	0	1	1	1	1	S100PBP	S100P binding protein
hsa-miR-1827	0	0	1	1	0	0	JMJD4	jumonji domain containing 4
hsa-miR-1827	1	0	1	1	1	1	WDTC1	WD and tetratricopeptide repeats 1
hsa-miR-1827	0	0	1	1	1	1	ARMC5	armadillo repeat containing 5
hsa-miR-1827	1	0	1	1	1	1	SMEK2	SMEK homolog 2, suppressor of mek1 (Dictyostelium)
hsa-miR-1827	0	0	1	1	1	1	SPATA5L1	spermatogenesis associated 5-like 1
hsa-miR-1827	1	0	1	1	1	1	MACF1	microtubule-actin crosslinking factor 1
hsa-miR-1827	1	0	1	1	0	0	CCDC136	coiled-coil domain containing 136
hsa-miR-1827	1	0	1	1	1	1	MARCH8	membrane-associated ring finger (C3HC4) 8, E3 ubiquitin protein ligase
hsa-miR-1827	1	0	1	1	1	1	USP33	ubiquitin specific peptidase 33
hsa-miR-1827	1	0	1	1	1	1	POMT2	protein-O-mannosyltransferase 2
hsa-miR-1827	0	0	1	0	0	0	LOC284561	uncharacterized LOC284561
hsa-miR-1827	0	0	1	1	1	1	CWF19L1	CWF19-like 1, cell cycle control (S. pombe)
hsa-miR-1827	0	0	1	1	0	0	PFDN5	prefoldin subunit 5
hsa-miR-1827	0	0	1	1	1	1	CDKAL1	CDK5 regulatory subunit associated protein 1-like 1
hsa-miR-1827	0	0	1	0	1	1	FLJ14186	uncharacterized LOC401149
hsa-miR-1827	1	0	1	1	1	1	COPS7B	COP9 constitutive photomorphogenic homolog subunit 7B (Arabidopsis)
hsa-miR-1827	0	0	1	1	0	0	SPON2	spondin 2, extracellular matrix protein
hsa-miR-1827	1	0	1	0	1	1	STK40	serine/threonine kinase 40
hsa-miR-1827	0	0	1	0	0	0	RASAL3	RAS protein activator like 3
hsa-miR-1827	1	0	1	1	1	1	GBF1	golgi brefeldin A resistant guanine nucleotide exchange factor 1
hsa-miR-1827	1	0	1	0	1	1	MYO5B	myosin VB
hsa-miR-1827	0	0	1	0	1	1	ATXN1L	ataxin 1-like
hsa-miR-1827	1	0	1	1	1	1	NAA30	N(alpha)-acetyltransferase 30, NatC catalytic subunit
hsa-miR-1827	0	0	1	1	1	1	C12orf65	chromosome 12 open reading frame 65
hsa-miR-1827	0	0	1	1	0	0	STPG1	sperm-tail PG-rich repeat containing 1
hsa-miR-1827	0	0	1	0	1	1	HEMK1	HemK methyltransferase family member 1
hsa-miR-1827	0	0	1	0	0	0	LINC00340	long intergenic non-protein coding RNA 340
hsa-miR-1827	0	0	1	0	1	1	FLJ22763	uncharacterized LOC401081
hsa-miR-1827	1	0	1	1	1	1	DCAF8	DDB1 and CUL4 associated factor 8
hsa-miR-1827	1	0	1	1	1	1	ITGA9	integrin, alpha 9
hsa-miR-1827	1	0	1	1	1	1	RNF185	ring finger protein 185
hsa-miR-1827	0	0	1	0	0	0	LOC729852	uncharacterized LOC729852
hsa-miR-1827	0	0	1	1	0	0	CCDC142	coiled-coil domain containing 142
hsa-miR-1827	1	0	1	1	1	1	FAM53C	family with sequence similarity 53, member C
hsa-miR-1827	1	0	1	1	1	1	MARK1	MAP/microtubule affinity-regulating kinase 1
hsa-miR-1827	0	0	1	1	1	1	DTL	denticleless E3 ubiquitin protein ligase homolog (Drosophila)
hsa-miR-1827	1	0	1	1	1	1	GPD2	glycerol-3-phosphate dehydrogenase 2 (mitochondrial)
hsa-miR-1827	1	0	1	1	1	1	KCTD15	potassium channel tetramerisation domain containing 15
hsa-miR-1827	0	0	1	1	1	1	SNAP47	synaptosomal-associated protein, 47kDa
hsa-miR-1827	0	0	1	1	0	0	IMPDH1	IMP (inosine 5'-monophosphate) dehydrogenase 1
hsa-miR-1827	1	0	1	0	1	1	ELMOD1	ELMO/CED-12 domain containing 1
hsa-miR-1827	0	0	1	0	0	0	CHST9-AS1	CHST9 antisense RNA 1
hsa-miR-1827	1	0	1	1	1	1	TPM1	tropomyosin 1 (alpha)
hsa-miR-1827	0	0	1	1	1	1	KLC4	kinesin light chain 4
hsa-miR-1827	1	0	1	1	0	0	SPEG	SPEG complex locus
hsa-miR-1827	1	0	1	1	1	1	AGAP3	ArfGAP with GTPase domain, ankyrin repeat and PH domain 3
hsa-miR-1827	0	0	1	1	1	1	FAM107A	family with sequence similarity 107, member A
hsa-miR-1827	1	0	1	1	1	1	FRMD6	FERM domain containing 6
hsa-miR-1827	0	0	1	0	0	0	LOC201617	uncharacterized LOC201617
hsa-miR-1827	0	0	1	1	1	1	DECR2	2,4-dienoyl CoA reductase 2, peroxisomal
hsa-miR-1827	1	0	1	1	1	1	DHX15	DEAH (Asp-Glu-Ala-His) box polypeptide 15
hsa-miR-1827	1	0	1	1	1	1	DIXDC1	DIX domain containing 1
hsa-miR-1827	1	0	1	1	0	0	MEPCE	methylphosphate capping enzyme
hsa-miR-1827	1	0	1	0	1	1	RNF165	ring finger protein 165
hsa-miR-1827	0	0	1	1	0	0	BEAN1	brain expressed, associated with NEDD4, 1
hsa-miR-1827	1	0	1	1	1	1	LMNA	lamin A/C
hsa-miR-1827	0	0	1	0	0	0	JPX	JPX transcript, XIST activator (non-protein coding)
hsa-miR-1827	1	0	1	1	1	1	AGPAT1	1-acylglycerol-3-phosphate O-acyltransferase 1 (lysophosphatidic acid acyltransferase, alpha)
hsa-miR-1827	1	0	1	1	1	1	SCAMP5	secretory carrier membrane protein 5
hsa-miR-1827	0	0	1	0	0	0	LOC284600	uncharacterized LOC284600
hsa-miR-1827	1	0	1	1	1	1	CLCN5	chloride channel, voltage-sensitive 5
hsa-miR-1827	0	0	1	1	0	0	ACOT8	acyl-CoA thioesterase 8
hsa-miR-1827	0	0	1	1	1	1	ZNF606	zinc finger protein 606
hsa-miR-1827	1	0	1	1	1	1	TPM3	tropomyosin 3
hsa-miR-1827	0	0	1	0	0	0	LOC157381	uncharacterized LOC157381
hsa-miR-1827	1	0	1	1	1	1	PCMTD1	protein-L-isoaspartate (D-aspartate) O-methyltransferase domain containing 1
hsa-miR-1827	0	0	1	1	1	1	COQ10A	coenzyme Q10 homolog A (S. cerevisiae)
hsa-miR-1827	1	0	1	1	1	1	MGAT1	mannosyl (alpha-1,3-)-glycoprotein beta-1,2-N-acetylglucosaminyltransferase
hsa-miR-1827	1	0	1	1	1	1	MAP3K11	mitogen-activated protein kinase kinase kinase 11
hsa-miR-1827	0	0	1	0	1	1	ARHGAP42	Rho GTPase activating protein 42
hsa-miR-1827	0	0	1	1	1	1	RANBP17	RAN binding protein 17
hsa-miR-1827	0	0	1	1	0	0	UBAP2	ubiquitin associated protein 2
hsa-miR-1827	0	0	1	1	0	0	FAM156A	family with sequence similarity 156, member A
hsa-miR-1827	0	0	1	0	0	0	LINC00637	long intergenic non-protein coding RNA 637
hsa-miR-1827	0	0	1	1	1	1	FXC1	fracture callus 1 homolog (rat)
hsa-miR-1827	0	0	1	1	1	1	ZBTB26	zinc finger and BTB domain containing 26
hsa-miR-1827	0	0	1	1	0	0	CD37	CD37 molecule
hsa-miR-1827	0	0	1	0	1	1	CCDC68	coiled-coil domain containing 68
hsa-miR-1827	0	0	1	0	1	1	UHMK1	U2AF homology motif (UHM) kinase 1
hsa-miR-1827	0	0	1	1	0	0	RHBDF2	rhomboid 5 homolog 2 (Drosophila)
hsa-miR-1827	1	0	1	1	1	1	PEAR1	platelet endothelial aggregation receptor 1
hsa-miR-1827	1	0	1	1	1	1	HLF	hepatic leukemia factor
hsa-miR-1827	0	0	1	0	1	1	CDHR3	cadherin-related family member 3
hsa-miR-1827	0	0	1	0	0	0	CAPN13	calpain 13
hsa-miR-1827	1	0	1	1	1	1	PRRT2	proline-rich transmembrane protein 2
hsa-miR-1827	0	0	1	1	1	1	PDZRN3	PDZ domain containing ring finger 3
hsa-miR-1827	0	0	1	1	1	1	SLC52A3	solute carrier family 52, riboflavin transporter, member 3
hsa-miR-1827	1	0	1	0	1	1	TPBG	trophoblast glycoprotein
hsa-miR-1827	0	0	1	1	0	0	PVRL3	poliovirus receptor-related 3
hsa-miR-1827	0	0	1	1	0	0	PIGO	phosphatidylinositol glycan anchor biosynthesis, class O
hsa-miR-1827	1	0	1	1	1	1	TLK1	tousled-like kinase 1
hsa-miR-1827	0	0	1	0	0	0	LOC643837	uncharacterized LOC643837
hsa-miR-1827	0	0	1	1	1	1	DYNC1I1	dynein, cytoplasmic 1, intermediate chain 1
hsa-miR-1827	1	0	1	1	1	1	AMMECR1	Alport syndrome, mental retardation, midface hypoplasia and elliptocytosis chromosomal region gene 1
hsa-miR-1827	0	0	1	0	1	1	PIANP	PILR alpha associated neural protein
hsa-miR-1827	1	0	1	1	1	1	SUPT16H	suppressor of Ty 16 homolog (S. cerevisiae)
hsa-miR-1827	0	0	1	0	0	0	LOC440910	uncharacterized LOC440910
hsa-miR-1827	1	0	1	1	1	1	FBXW2	F-box and WD repeat domain containing 2
hsa-miR-1827	0	0	1	1	1	1	CD34	CD34 molecule
hsa-miR-1827	1	0	1	1	0	0	PHGDH	phosphoglycerate dehydrogenase
hsa-miR-1827	0	0	1	0	0	0	LOC283887	uncharacterized LOC283887
hsa-miR-1827	0	0	1	1	1	1	MARC1	mitochondrial amidoxime reducing component 1
hsa-miR-1827	1	0	1	1	1	1	BANP	BTG3 associated nuclear protein
hsa-miR-1827	1	0	1	0	1	1	KIAA1456	KIAA1456
hsa-miR-1827	1	0	1	1	1	1	KCND1	potassium voltage-gated channel, Shal-related subfamily, member 1
hsa-miR-1827	0	0	1	0	0	0	PART1	prostate androgen-regulated transcript 1 (non-protein coding)
hsa-miR-1827	1	0	1	1	1	1	SLC7A8	solute carrier family 7 (amino acid transporter light chain, L system), member 8
hsa-miR-1827	1	0	1	1	1	1	KLC2	kinesin light chain 2
hsa-miR-1827	0	0	1	0	0	0	ZNF806	zinc finger protein 806
hsa-miR-1827	1	0	1	0	1	1	GATAD2B	GATA zinc finger domain containing 2B
hsa-miR-1827	1	0	1	0	1	1	NCOA7	nuclear receptor coactivator 7
hsa-miR-1827	0	0	1	1	0	0	CES4A	carboxylesterase 4A
hsa-miR-1827	0	0	1	1	1	1	ATP6V1H	ATPase, H+ transporting, lysosomal 50/57kDa, V1 subunit H
hsa-miR-1827	0	0	1	1	1	1	AIFM3	apoptosis-inducing factor, mitochondrion-associated, 3
hsa-miR-1827	1	0	1	1	1	1	LPPR2	lipid phosphate phosphatase-related protein type 2
hsa-miR-1827	0	0	1	1	1	1	TMEM170A	transmembrane protein 170A
hsa-miR-1827	1	0	1	1	1	1	GCLC	glutamate-cysteine ligase, catalytic subunit
hsa-miR-1827	1	0	1	0	1	1	IL1RAP	interleukin 1 receptor accessory protein
hsa-miR-1827	0	0	1	1	0	0	DPAGT1	dolichyl-phosphate (UDP-N-acetylglucosamine) N-acetylglucosaminephosphotransferase 1 (GlcNAc-1-P transferase)
hsa-miR-1827	1	0	1	1	1	1	NDEL1	nudE nuclear distribution E homolog (A. nidulans)-like 1
hsa-miR-1827	0	0	1	1	0	0	ZNF185	zinc finger protein 185 (LIM domain)
hsa-miR-1827	1	0	1	0	1	1	UBXN4	UBX domain protein 4
hsa-miR-1827	1	0	1	1	1	1	KCNIP3	Kv channel interacting protein 3, calsenilin
hsa-miR-1827	1	0	1	1	1	1	SPATS2	spermatogenesis associated, serine-rich 2
hsa-miR-1827	0	0	1	0	1	1	NBPF3	neuroblastoma breakpoint family, member 3
hsa-miR-1827	0	0	1	0	0	0	LOC284577	uncharacterized LOC284577
hsa-miR-1827	1	0	1	1	1	1	ALCAM	activated leukocyte cell adhesion molecule
hsa-miR-1827	1	0	1	1	1	1	CS	citrate synthase
hsa-miR-1827	0	0	1	1	1	1	FBLN1	fibulin 1
hsa-miR-1827	1	0	1	1	1	1	ACSL1	acyl-CoA synthetase long-chain family member 1
hsa-miR-1827	1	0	1	1	1	1	FADS1	fatty acid desaturase 1
hsa-miR-1827	0	0	1	0	0	0	FAM66C	family with sequence similarity 66, member C
hsa-miR-1827	1	0	1	1	0	0	FBRS	fibrosin
hsa-miR-1827	0	0	1	1	0	0	ERGIC3	ERGIC and golgi 3
hsa-miR-1827	0	0	1	0	0	0	LOC643327	uncharacterized LOC643327
hsa-miR-1827	1	0	1	0	1	1	THRB	thyroid hormone receptor, beta
hsa-miR-1827	1	0	1	1	1	1	SYT6	synaptotagmin VI
hsa-miR-1827	0	0	1	0	0	0	LOC285505	uncharacterized LOC285505
hsa-miR-1827	0	0	1	1	1	1	IL17RE	interleukin 17 receptor E
hsa-miR-1827	1	0	1	1	1	1	ETS2	v-ets erythroblastosis virus E26 oncogene homolog 2 (avian)
hsa-miR-1827	0	0	1	1	0	0	CHCHD5	coiled-coil-helix-coiled-coil-helix domain containing 5
hsa-miR-1827	1	0	1	1	1	1	LCP1	lymphocyte cytosolic protein 1 (L-plastin)
hsa-miR-1827	0	0	1	0	0	0	LOC400680	uncharacterized LOC400680
hsa-miR-1827	0	0	1	0	0	0	LINC00293	long intergenic non-protein coding RNA 293
hsa-miR-1827	0	0	1	0	0	0	GOLGA6L1	golgin A6 family-like 1
hsa-miR-1827	1	0	1	0	1	1	PRKAR1A	protein kinase, cAMP-dependent, regulatory, type I, alpha
hsa-miR-1827	0	0	1	1	1	1	RBM4	RNA binding motif protein 4
hsa-miR-1827	1	0	1	1	1	1	PRKAG1	protein kinase, AMP-activated, gamma 1 non-catalytic subunit
hsa-miR-1827	0	0	1	1	0	0	PSAPL1	prosaposin-like 1 (gene/pseudogene)
hsa-miR-1827	0	0	1	1	0	0	LUC7L	LUC7-like (S. cerevisiae)
hsa-miR-1827	0	0	1	0	0	0	CECR7	cat eye syndrome chromosome region, candidate 7 (non-protein coding)
hsa-miR-1827	0	0	1	1	1	1	VIPAS39	VPS33B interacting protein, apical-basolateral polarity regulator, spe-39 homolog
hsa-miR-1827	0	0	1	1	0	0	TRAPPC12	trafficking protein particle complex 12
hsa-miR-1827	1	0	1	1	1	1	NAP1L1	nucleosome assembly protein 1-like 1
hsa-miR-1827	0	0	1	1	0	0	KIAA0146	KIAA0146
hsa-miR-1827	1	0	1	1	1	1	AGAP2	ArfGAP with GTPase domain, ankyrin repeat and PH domain 2
hsa-miR-1827	0	0	1	1	1	1	ZDHHC15	zinc finger, DHHC-type containing 15
hsa-miR-1827	1	0	1	1	0	0	WIZ	widely interspaced zinc finger motifs
hsa-miR-1827	1	0	1	1	1	1	BCL6B	B-cell CLL/lymphoma 6, member B
hsa-miR-1827	1	0	1	1	0	0	CACNB3	calcium channel, voltage-dependent, beta 3 subunit
hsa-miR-1827	1	0	1	1	1	1	ZBTB4	zinc finger and BTB domain containing 4
hsa-miR-1827	0	0	1	1	1	1	FRMPD2	FERM and PDZ domain containing 2
hsa-miR-1827	0	0	1	1	0	0	SCUBE2	signal peptide, CUB domain, EGF-like 2
hsa-miR-1827	1	0	1	1	1	1	CBLB	Cbl proto-oncogene, E3 ubiquitin protein ligase B
hsa-miR-1827	0	0	1	1	0	0	SSPO	SCO-spondin homolog (Bos taurus)
hsa-miR-1827	1	0	1	1	1	1	PLEKHH1	pleckstrin homology domain containing, family H (with MyTH4 domain) member 1
hsa-miR-1827	0	0	1	1	1	1	FAM5B	family with sequence similarity 5, member B
hsa-miR-1827	1	0	1	1	1	1	EGLN3	egl nine homolog 3 (C. elegans)
hsa-miR-1827	0	0	1	1	1	1	SLC13A3	solute carrier family 13 (sodium-dependent dicarboxylate transporter), member 3
hsa-miR-1827	0	0	1	1	1	1	RGS3	regulator of G-protein signaling 3
hsa-miR-1827	0	0	1	1	1	1	FAM19A2	family with sequence similarity 19 (chemokine (C-C motif)-like), member A2
hsa-miR-1827	1	0	1	1	1	1	FAM219A	family with sequence similarity 219, member A
hsa-miR-1827	0	0	1	0	0	0	IL10RB	interleukin 10 receptor, beta
hsa-miR-1827	0	0	1	1	1	1	SLC9A1	solute carrier family 9, subfamily A (NHE1, cation proton antiporter 1), member 1
hsa-miR-1827	1	0	1	1	1	1	SMAP1	small ArfGAP 1
hsa-miR-1827	0	0	1	0	1	1	LOC389641	uncharacterized LOC389641
hsa-miR-1827	0	0	1	1	0	0	NPIP	nuclear pore complex interacting protein
hsa-miR-1827	1	0	1	1	1	1	FAM122B	family with sequence similarity 122B
hsa-miR-1827	1	0	1	1	1	1	CORO2B	coronin, actin binding protein, 2B
hsa-miR-1827	0	0	1	1	0	0	JAKMIP1	janus kinase and microtubule interacting protein 1
hsa-miR-1827	0	0	1	1	0	0	PPP1R18	protein phosphatase 1, regulatory subunit 18
hsa-miR-1827	0	0	1	1	1	1	C2orf91	chromosome 2 open reading frame 91
hsa-miR-1827	1	0	1	1	1	1	PIAS3	protein inhibitor of activated STAT, 3
hsa-miR-1827	1	0	1	1	1	1	METAP2	methionyl aminopeptidase 2
hsa-miR-1827	0	0	1	1	0	0	LOC100128239	uncharacterized LOC100128239
hsa-miR-1827	0	0	1	1	1	1	CCDC66	coiled-coil domain containing 66
hsa-miR-1827	1	0	1	0	0	0	ANKRD52	ankyrin repeat domain 52
hsa-miR-1827	1	0	1	1	1	1	KTN1	kinectin 1 (kinesin receptor)
hsa-miR-1827	0	0	1	0	1	1	RASGRP3	RAS guanyl releasing protein 3 (calcium and DAG-regulated)
hsa-miR-1827	0	0	1	0	0	0	FAM95B1	family with sequence similarity 95, member B1
hsa-miR-1827	0	0	1	1	0	0	THADA	thyroid adenoma associated
hsa-miR-1827	0	0	1	1	0	0	C20orf141	chromosome 20 open reading frame 141
hsa-miR-1827	0	0	1	1	0	0	DNAH17	dynein, axonemal, heavy chain 17
hsa-miR-1827	1	0	1	1	0	0	ATXN7L3	ataxin 7-like 3
hsa-miR-1827	1	0	1	1	1	1	SACM1L	SAC1 suppressor of actin mutations 1-like (yeast)
hsa-miR-1827	0	0	1	1	0	0	CLDN4	claudin 4
hsa-miR-1827	1	0	1	1	1	1	SLC1A4	solute carrier family 1 (glutamate/neutral amino acid transporter), member 4
hsa-miR-1827	0	0	1	1	0	0	LLGL2	lethal giant larvae homolog 2 (Drosophila)
hsa-miR-1827	0	0	1	1	1	1	ZFYVE28	zinc finger, FYVE domain containing 28
hsa-miR-1827	1	0	1	1	0	0	TNK2	tyrosine kinase, non-receptor, 2
hsa-miR-1827	1	0	1	1	1	1	LRIG1	leucine-rich repeats and immunoglobulin-like domains 1
hsa-miR-1827	1	0	1	0	1	1	GPR180	G protein-coupled receptor 180
hsa-miR-1827	0	0	1	0	0	0	RPL23AP53	ribosomal protein L23a pseudogene 53
hsa-miR-1827	1	0	1	1	1	1	MKRN1	makorin ring finger protein 1
hsa-miR-1827	0	0	1	1	0	0	FAM54B	family with sequence similarity 54, member B
hsa-miR-1827	1	0	1	1	1	1	FMNL3	formin-like 3
hsa-miR-1827	1	0	1	1	1	1	UBE3B	ubiquitin protein ligase E3B
hsa-miR-1827	1	0	1	0	1	1	YAF2	YY1 associated factor 2
hsa-miR-1827	0	0	1	0	0	0	LOC285812	uncharacterized LOC285812
hsa-miR-1827	1	0	1	1	1	1	RNF44	ring finger protein 44
hsa-miR-1827	1	0	1	1	1	1	EYA1	eyes absent homolog 1 (Drosophila)
hsa-miR-1827	0	0	1	1	0	0	AADACL3	arylacetamide deacetylase-like 3
hsa-miR-1827	1	0	1	1	1	1	PLA2G15	phospholipase A2, group XV
hsa-miR-1827	1	0	1	1	1	1	NSUN4	NOP2/Sun domain family, member 4
hsa-miR-1827	0	0	1	1	0	0	LOC100128682	uncharacterized LOC100128682
hsa-miR-1827	1	0	1	1	1	1	SLC12A6	solute carrier family 12 (potassium/chloride transporters), member 6
hsa-miR-1827	0	0	1	0	0	0	FAM205B	transmembrane protein C9orf144B pseudogene
hsa-miR-1827	1	0	1	0	1	1	KDM2A	lysine (K)-specific demethylase 2A
hsa-miR-1827	0	0	1	1	1	1	MON1B	MON1 homolog B (yeast)
hsa-miR-1827	1	0	1	1	1	1	AIF1L	allograft inflammatory factor 1-like
hsa-miR-1827	1	0	1	1	1	1	BCAT1	branched chain amino-acid transaminase 1, cytosolic
hsa-miR-1827	1	0	1	0	1	1	KPNA6	karyopherin alpha 6 (importin alpha 7)
hsa-miR-1827	0	0	1	1	1	1	ATXN2	ataxin 2
hsa-miR-1827	0	0	1	0	0	0	IDO2	indoleamine 2,3-dioxygenase 2
hsa-miR-1827	0	0	1	1	1	1	GFAP	glial fibrillary acidic protein
hsa-miR-1827	1	0	1	0	1	1	CYB561D1	cytochrome b-561 domain containing 1
hsa-miR-1827	1	0	1	1	1	1	PHC2	polyhomeotic homolog 2 (Drosophila)
hsa-miR-1827	0	0	1	0	0	0	PINLYP	phospholipase A2 inhibitor and LY6/PLAUR domain containing
hsa-miR-1827	0	0	1	1	1	1	TBX19	T-box 19
hsa-miR-1827	0	0	1	0	0	0	FAM27A	family with sequence similarity 27, member A
hsa-miR-1827	0	0	1	0	0	0	LOC390660	FLJ00317 protein
hsa-miR-1827	0	0	1	1	0	0	MAMSTR	MEF2 activating motif and SAP domain containing transcriptional regulator
hsa-miR-1827	0	0	1	1	1	1	ZNF346	zinc finger protein 346
hsa-miR-1827	0	0	1	1	1	1	PAK6	p21 protein (Cdc42/Rac)-activated kinase 6
hsa-miR-1827	1	0	1	1	1	1	MAP2K4	mitogen-activated protein kinase kinase 4
hsa-miR-1827	0	0	1	0	0	0	LOC619207	scavenger receptor protein family member
hsa-miR-1827	0	0	1	0	0	0	AGAP9	ArfGAP with GTPase domain, ankyrin repeat and PH domain 9
hsa-miR-1827	0	0	1	1	0	0	ZSCAN18	zinc finger and SCAN domain containing 18
hsa-miR-1827	0	0	1	1	0	0	SCNN1A	sodium channel, non-voltage-gated 1 alpha subunit
hsa-miR-1827	0	0	1	1	1	1	FANCC	Fanconi anemia, complementation group C
hsa-miR-1827	1	0	1	1	1	1	RPS6KA4	ribosomal protein S6 kinase, 90kDa, polypeptide 4
hsa-miR-1827	1	0	1	0	1	1	SEZ6	seizure related 6 homolog (mouse)
hsa-miR-1827	0	0	1	1	1	1	DHRS3	dehydrogenase/reductase (SDR family) member 3
hsa-miR-1827	0	0	1	0	1	1	PEX5	peroxisomal biogenesis factor 5
hsa-miR-1827	1	0	1	1	1	1	ATL2	atlastin GTPase 2
hsa-miR-1827	1	0	1	1	1	1	TMEM25	transmembrane protein 25
hsa-miR-1827	1	0	1	1	1	1	CAMK2G	calcium/calmodulin-dependent protein kinase II gamma
hsa-miR-1827	1	0	1	1	1	1	COBLL1	COBL-like 1
hsa-miR-1827	0	0	1	1	1	1	PSMG2	proteasome (prosome, macropain) assembly chaperone 2
hsa-miR-1827	0	0	1	1	0	0	HSPB11	heat shock protein family B (small), member 11
hsa-miR-1827	0	0	1	1	1	1	CCKBR	cholecystokinin B receptor
hsa-miR-1827	0	0	1	1	1	1	RNF135	ring finger protein 135
hsa-miR-1827	1	0	1	1	1	1	NCOA1	nuclear receptor coactivator 1
hsa-miR-1827	0	0	1	1	1	1	PRSS16	protease, serine, 16 (thymus)
hsa-miR-1827	1	0	1	1	1	1	APBB2	amyloid beta (A4) precursor protein-binding, family B, member 2
hsa-miR-1827	0	0	1	1	1	1	PTPN20B	protein tyrosine phosphatase, non-receptor type 20B
hsa-miR-1827	0	0	1	1	1	1	PTPN20A	protein tyrosine phosphatase, non-receptor type 20A
hsa-miR-1827	0	0	1	1	0	0	KAT8	K(lysine) acetyltransferase 8
hsa-miR-1827	0	0	1	1	0	0	OPLAH	5-oxoprolinase (ATP-hydrolysing)
hsa-miR-1827	1	0	1	1	1	1	TAB2	TGF-beta activated kinase 1/MAP3K7 binding protein 2
hsa-miR-1827	0	0	1	0	0	0	POM121L8P	POM121 transmembrane nucleoporin-like 8 pseudogene
hsa-miR-1827	0	0	1	1	1	1	TTLL5	tubulin tyrosine ligase-like family, member 5
hsa-miR-1827	0	0	1	1	1	1	KIDINS220	kinase D-interacting substrate, 220kDa
hsa-miR-1827	0	0	1	1	0	0	WDR96	WD repeat domain 96
hsa-miR-1827	0	0	1	1	1	1	MYO9A	myosin IXA
hsa-miR-1827	1	0	1	1	1	1	ERI1	exoribonuclease 1
hsa-miR-1827	0	0	1	1	0	0	DDX49	DEAD (Asp-Glu-Ala-Asp) box polypeptide 49
hsa-miR-1827	0	0	1	1	1	1	AQP6	aquaporin 6, kidney specific
hsa-miR-1827	0	0	1	1	0	0	DOPEY1	dopey family member 1
hsa-miR-1827	0	0	1	1	1	1	SLC30A10	solute carrier family 30, member 10
hsa-miR-1827	1	0	1	0	1	1	GRIN3A	glutamate receptor, ionotropic, N-methyl-D-aspartate 3A
hsa-miR-1827	0	0	1	0	0	0	FAM66D	family with sequence similarity 66, member D
hsa-miR-1827	0	0	1	1	0	0	KRBA1	KRAB-A domain containing 1
hsa-miR-1827	0	0	1	1	1	1	BEND7	BEN domain containing 7
hsa-miR-1827	0	0	1	1	0	0	LETM2	leucine zipper-EF-hand containing transmembrane protein 2
hsa-miR-1827	1	0	1	1	1	1	CHMP7	charged multivesicular body protein 7
hsa-miR-1827	1	0	1	1	1	1	NFX1	nuclear transcription factor, X-box binding 1
hsa-miR-1827	0	0	1	1	1	1	MYPN	myopalladin
hsa-miR-1827	1	0	1	0	1	1	MPP5	membrane protein, palmitoylated 5 (MAGUK p55 subfamily member 5)
hsa-miR-1827	1	0	1	1	0	0	PTAR1	protein prenyltransferase alpha subunit repeat containing 1
hsa-miR-1827	0	0	1	1	1	1	USPL1	ubiquitin specific peptidase like 1
hsa-miR-1827	1	0	1	1	1	1	SBF2	SET binding factor 2
hsa-miR-1827	0	0	1	1	1	1	INPP5B	inositol polyphosphate-5-phosphatase, 75kDa
hsa-miR-1827	0	0	1	1	0	0	TMEM91	transmembrane protein 91
hsa-miR-1827	1	0	1	1	1	1	HMCN1	hemicentin 1
hsa-miR-1827	0	0	1	1	0	0	FCRL3	Fc receptor-like 3
hsa-miR-1827	0	0	1	1	1	1	TAF8	TAF8 RNA polymerase II, TATA box binding protein (TBP)-associated factor, 43kDa
hsa-miR-1827	0	0	1	1	0	0	TMEM116	transmembrane protein 116
hsa-miR-1827	1	0	1	0	1	1	EXOC5	exocyst complex component 5
hsa-miR-1827	1	0	1	1	1	1	IL17RD	interleukin 17 receptor D
hsa-miR-1827	1	0	1	0	0	0	NPEPL1	aminopeptidase-like 1
hsa-miR-1827	0	0	1	1	0	0	TTLL6	tubulin tyrosine ligase-like family, member 6
hsa-miR-1827	1	0	1	1	0	0	LRRC16B	leucine rich repeat containing 16B
hsa-miR-1827	1	0	1	1	1	1	CAPRIN2	caprin family member 2
hsa-miR-1827	1	0	1	1	1	1	MBD6	methyl-CpG binding domain protein 6
hsa-miR-1827	1	0	1	0	1	1	JAZF1	JAZF zinc finger 1
hsa-miR-1827	1	0	1	0	1	1	KIF21B	kinesin family member 21B
hsa-miR-1827	0	0	1	1	1	1	LMAN2L	lectin, mannose-binding 2-like
hsa-miR-1827	0	0	1	0	1	1	PSG1	pregnancy specific beta-1-glycoprotein 1
hsa-miR-1827	1	0	1	1	1	1	RNF38	ring finger protein 38
hsa-miR-1827	0	0	1	0	0	0	PMCHL1	pro-melanin-concentrating hormone-like 1, pseudogene
hsa-miR-1827	0	0	1	0	0	0	PMCHL2	pro-melanin-concentrating hormone-like 2, pseudogene
hsa-miR-1827	0	0	1	0	1	1	STEAP2	STEAP family member 2, metalloreductase
hsa-miR-1827	0	0	1	1	1	1	KLHL7	kelch-like 7 (Drosophila)
hsa-miR-1827	1	0	1	1	1	1	RCAN2	regulator of calcineurin 2
hsa-miR-1827	0	0	1	1	1	1	TSPAN17	tetraspanin 17
hsa-miR-1827	0	0	1	1	1	1	CD209	CD209 molecule
hsa-miR-1827	0	0	1	1	1	1	GPRASP1	G protein-coupled receptor associated sorting protein 1
hsa-miR-1827	0	0	1	0	0	0	GRIK1-AS1	GRIK1 antisense RNA 1
hsa-miR-1827	0	0	1	1	0	0	GPC2	glypican 2
hsa-miR-1827	1	0	1	1	1	1	USF2	upstream transcription factor 2, c-fos interacting
hsa-miR-1827	1	0	1	1	1	1	LUZP2	leucine zipper protein 2
hsa-miR-1827	0	0	1	1	0	0	CMTM1	CKLF-like MARVEL transmembrane domain containing 1
hsa-miR-1827	1	0	1	1	1	1	WDR26	WD repeat domain 26
hsa-miR-1827	0	0	1	1	0	0	GLYCTK	glycerate kinase
hsa-miR-1827	1	0	1	1	1	1	OPRM1	opioid receptor, mu 1
hsa-miR-1827	0	0	1	0	0	0	MEG3	maternally expressed 3 (non-protein coding)
hsa-miR-1827	1	0	1	1	1	1	RIC3	resistance to inhibitors of cholinesterase 3 homolog (C. elegans)
hsa-miR-1827	0	0	1	1	1	1	MFAP5	microfibrillar associated protein 5
hsa-miR-1827	1	0	1	1	1	1	IQGAP2	IQ motif containing GTPase activating protein 2
hsa-miR-1827	0	0	1	1	1	1	LINGO2	leucine rich repeat and Ig domain containing 2
hsa-miR-1827	0	0	1	1	1	1	SLC22A12	solute carrier family 22 (organic anion/urate transporter), member 12
hsa-miR-1827	1	0	1	1	0	0	CLASRP	CLK4-associating serine/arginine rich protein
hsa-miR-1827	0	0	1	1	0	0	RAET1E	retinoic acid early transcript 1E
hsa-miR-1827	1	0	1	0	1	1	ANKRD28	ankyrin repeat domain 28
hsa-miR-1827	0	0	1	1	1	1	PAQR5	progestin and adipoQ receptor family member V
hsa-miR-1827	0	0	1	1	1	1	PTPRC	protein tyrosine phosphatase, receptor type, C
hsa-miR-1827	0	0	1	1	1	1	POTEG	POTE ankyrin domain family, member G
hsa-miR-1827	0	0	1	1	0	0	SH2D6	SH2 domain containing 6
hsa-miR-1827	0	0	1	0	1	1	XKR5	XK, Kell blood group complex subunit-related family, member 5
hsa-miR-1827	1	0	1	1	1	1	MECP2	methyl CpG binding protein 2 (Rett syndrome)
hsa-miR-1827	0	0	1	1	1	1	TERF1	telomeric repeat binding factor (NIMA-interacting) 1
hsa-miR-1827	0	0	1	1	1	1	TMUB1	transmembrane and ubiquitin-like domain containing 1
hsa-miR-1827	0	0	1	1	0	0	DHRS4	dehydrogenase/reductase (SDR family) member 4
hsa-miR-1827	1	0	1	1	0	0	ZCCHC4	zinc finger, CCHC domain containing 4
hsa-miR-1827	0	0	1	1	1	1	IL24	interleukin 24
hsa-miR-1827	0	0	1	1	1	1	RHD	Rh blood group, D antigen
hsa-miR-1827	1	0	1	1	1	1	MYB	v-myb myeloblastosis viral oncogene homolog (avian)
hsa-miR-1827	0	0	1	0	0	0	PTPRVP	protein tyrosine phosphatase, receptor type, V, pseudogene
hsa-miR-1827	0	0	1	1	1	1	MTFP1	mitochondrial fission process 1
hsa-miR-1827	0	0	1	1	1	1	IL23R	interleukin 23 receptor
hsa-miR-1827	0	0	1	1	1	1	IYD	iodotyrosine deiodinase
hsa-miR-1827	1	0	1	1	1	1	AMOT	angiomotin
hsa-miR-1827	1	0	1	0	1	1	FAM46A	family with sequence similarity 46, member A
hsa-miR-1827	0	0	1	1	0	0	MPV17	MpV17 mitochondrial inner membrane protein
hsa-miR-1827	0	0	1	1	0	0	ACOT11	acyl-CoA thioesterase 11
hsa-miR-1827	0	0	1	1	1	1	B4GALT2	UDP-Gal:betaGlcNAc beta 1,4- galactosyltransferase, polypeptide 2
hsa-miR-1827	0	0	1	1	1	1	WDR55	WD repeat domain 55
hsa-miR-1827	0	0	1	1	0	0	WRAP73	WD repeat containing, antisense to TP73
hsa-miR-1827	1	0	1	0	1	1	DPYSL5	dihydropyrimidinase-like 5
hsa-miR-1827	1	0	1	1	1	1	TSPAN14	tetraspanin 14
hsa-miR-1827	0	0	1	1	1	1	TUFT1	tuftelin 1
hsa-miR-1827	1	0	1	1	1	1	RIMS3	regulating synaptic membrane exocytosis 3
hsa-miR-1827	0	0	1	1	1	1	FTO	fat mass and obesity associated
hsa-miR-1827	0	0	1	1	1	1	CHEK1	checkpoint kinase 1
hsa-miR-1827	1	0	1	1	1	1	SMO	smoothened, frizzled family receptor
hsa-miR-1827	0	0	1	0	0	0	DNM1P33	DNM1 pseudogene 33
hsa-miR-1827	0	0	1	1	0	0	CBX5	chromobox homolog 5
hsa-miR-1827	0	0	1	1	0	0	AGBL5	ATP/GTP binding protein-like 5
hsa-miR-1827	1	0	1	1	0	0	SAP30BP	SAP30 binding protein
hsa-miR-1827	0	0	1	1	0	0	RBM14	RNA binding motif protein 14
hsa-miR-1827	1	0	1	1	1	1	TRIM39	tripartite motif containing 39
hsa-miR-1827	1	0	1	1	1	1	LMBR1L	limb region 1 homolog (mouse)-like
hsa-miR-1827	0	0	1	1	1	1	TMEM30A	transmembrane protein 30A
hsa-miR-1827	0	0	1	0	0	0	ATXN7L3B	ataxin 7-like 3B
hsa-miR-1827	0	0	1	0	0	0	LOC400043	uncharacterized LOC400043
hsa-miR-1827	1	0	1	1	1	1	GSPT1	G1 to S phase transition 1
hsa-miR-1827	1	0	1	0	1	1	TMEM39A	transmembrane protein 39A
hsa-miR-1827	1	0	1	1	0	0	SIGMAR1	sigma non-opioid intracellular receptor 1
hsa-miR-1827	0	0	1	0	0	0	LOC154761	family with sequence similarity 115, member C pseudogene
hsa-miR-1827	0	0	1	1	1	1	ATXN2L	ataxin 2-like
hsa-miR-1827	1	0	1	1	1	1	SZRD1	SUZ RNA binding domain containing 1
hsa-miR-1827	0	0	1	1	0	0	NDUFA3	NADH dehydrogenase (ubiquinone) 1 alpha subcomplex, 3, 9kDa
hsa-miR-1827	1	0	1	0	1	1	CNP	2',3'-cyclic nucleotide 3' phosphodiesterase
hsa-miR-1827	0	0	1	1	1	1	GNL3L	guanine nucleotide binding protein-like 3 (nucleolar)-like
hsa-miR-1827	0	0	1	0	0	0	GRAMD1B	GRAM domain containing 1B
hsa-miR-1827	1	0	1	0	1	1	TBC1D5	TBC1 domain family, member 5
hsa-miR-1827	1	0	1	1	1	1	CAP1	CAP, adenylate cyclase-associated protein 1 (yeast)
hsa-miR-1827	0	0	1	1	1	1	KLHL29	kelch-like 29 (Drosophila)
hsa-miR-1827	0	0	1	1	1	1	C2orf65	chromosome 2 open reading frame 65
hsa-miR-1827	0	0	1	1	0	0	CCDC36	coiled-coil domain containing 36
hsa-miR-1827	1	0	1	1	1	1	PAPOLA	poly(A) polymerase alpha
hsa-miR-1827	0	0	1	1	1	1	C8orf33	chromosome 8 open reading frame 33
hsa-miR-1827	0	0	1	0	0	0	KLHL15	kelch-like 15 (Drosophila)
hsa-miR-1827	0	0	1	1	0	0	PREB	prolactin regulatory element binding
hsa-miR-1827	1	0	1	1	1	1	NRF1	nuclear respiratory factor 1
hsa-miR-1827	0	0	1	1	0	0	SARNP	SAP domain containing ribonucleoprotein
hsa-miR-1827	1	0	1	1	1	1	DNAJC14	DnaJ (Hsp40) homolog, subfamily C, member 14
hsa-miR-1827	0	0	1	0	0	0	APOBEC3D	apolipoprotein B mRNA editing enzyme, catalytic polypeptide-like 3D
hsa-miR-1827	0	0	1	0	0	0	LOC100144602	uncharacterized LOC100144602
hsa-miR-1827	0	0	1	1	1	1	RDH11	retinol dehydrogenase 11 (all-trans/9-cis/11-cis)
hsa-miR-1827	0	0	1	1	1	1	PEX14	peroxisomal biogenesis factor 14
hsa-miR-1827	0	0	1	0	0	0	TCP11L2	t-complex 11 (mouse)-like 2
hsa-miR-1827	0	0	1	0	0	0	FAM200B	family with sequence similarity 200, member B
hsa-miR-1827	1	0	1	1	1	1	ARHGEF9	Cdc42 guanine nucleotide exchange factor (GEF) 9
hsa-miR-1827	1	0	1	0	1	1	SLC19A2	solute carrier family 19 (thiamine transporter), member 2
hsa-miR-1827	1	0	1	1	1	1	KIAA1217	KIAA1217
hsa-miR-1827	0	0	1	0	0	0	LOC100130776	uncharacterized LOC100130776
hsa-miR-1827	0	0	1	1	1	1	LRRK1	leucine-rich repeat kinase 1
hsa-miR-1827	0	0	1	1	1	1	NELL2	NEL-like 2 (chicken)
hsa-miR-1827	0	0	1	0	1	1	ZNF718	zinc finger protein 718
hsa-miR-1827	1	0	1	1	1	1	TM9SF4	transmembrane 9 superfamily protein member 4
hsa-miR-1827	0	0	1	0	0	0	DKFZP434K028	uncharacterized LOC26070
hsa-miR-1827	0	0	1	0	0	0	KIAA0664L3	KIAA0664-like 3
hsa-miR-1827	1	0	1	1	1	1	SCML4	sex comb on midleg-like 4 (Drosophila)
hsa-miR-1827	1	0	1	1	1	1	C11orf30	chromosome 11 open reading frame 30
hsa-miR-1827	0	0	1	0	0	0	LOC284260	uncharacterized LOC284260
hsa-miR-1827	0	0	1	0	0	0	NBR2	neighbor of BRCA1 gene 2 (non-protein coding)
hsa-miR-1827	1	0	1	1	1	1	SPRYD7	SPRY domain containing 7
hsa-miR-1827	0	0	1	1	1	1	CDC42SE2	CDC42 small effector 2
hsa-miR-1827	1	0	1	1	1	1	SPOCK2	sparc/osteonectin, cwcv and kazal-like domains proteoglycan (testican) 2
hsa-miR-1827	0	0	1	1	0	0	FAM89B	family with sequence similarity 89, member B
hsa-miR-1827	1	0	1	0	1	1	CDK19	cyclin-dependent kinase 19
hsa-miR-1827	0	0	1	0	0	0	SNX29P2	sorting nexin 29 pseudogene 2
hsa-miR-1827	0	0	1	0	0	0	TRAV20	T cell receptor alpha variable 20
hsa-miR-1827	0	0	1	1	0	0	CCDC114	coiled-coil domain containing 114
hsa-miR-1827	1	0	1	1	1	1	VASP	vasodilator-stimulated phosphoprotein
hsa-miR-1827	1	0	1	1	1	1	EPHA4	EPH receptor A4
hsa-miR-1827	0	0	1	1	0	0	TRO	trophinin
hsa-miR-1827	0	0	1	0	0	0	EVPLL	envoplakin-like
hsa-miR-1827	0	0	1	0	1	1	FHAD1	forkhead-associated (FHA) phosphopeptide binding domain 1
hsa-miR-1827	0	0	1	1	1	1	LY9	lymphocyte antigen 9
hsa-miR-1827	1	0	1	1	1	1	RSPO2	R-spondin 2
hsa-miR-1827	1	0	1	0	1	1	MAGIX	MAGI family member, X-linked
hsa-miR-1827	1	0	1	1	1	1	PTPRD	protein tyrosine phosphatase, receptor type, D
hsa-miR-1827	0	0	1	0	1	1	PAPOLG	poly(A) polymerase gamma
hsa-miR-1827	1	0	1	1	1	1	HTR2C	5-hydroxytryptamine (serotonin) receptor 2C, G protein-coupled
hsa-miR-1827	0	0	1	1	1	1	KIAA1755	KIAA1755
hsa-miR-1827	0	0	1	0	0	0	LOC100130950	uncharacterized LOC100130950
hsa-miR-1827	0	0	1	1	0	0	GEMIN6	gem (nuclear organelle) associated protein 6
hsa-miR-1827	0	0	1	1	1	1	SEMA3D	sema domain, immunoglobulin domain (Ig), short basic domain, secreted, (semaphorin) 3D
hsa-miR-1827	0	0	1	1	1	1	TFAM	transcription factor A, mitochondrial
hsa-miR-1827	0	0	1	1	1	1	LRRC27	leucine rich repeat containing 27
hsa-miR-1827	1	0	1	0	1	1	SV2B	synaptic vesicle glycoprotein 2B
hsa-miR-1827	0	0	1	1	1	1	SH3TC1	SH3 domain and tetratricopeptide repeats 1
hsa-miR-1827	0	0	1	1	1	1	STAG3L1	stromal antigen 3-like 1
hsa-miR-1827	1	0	1	1	1	1	GABRA1	gamma-aminobutyric acid (GABA) A receptor, alpha 1
hsa-miR-1827	0	0	1	1	1	1	ZNF100	zinc finger protein 100
hsa-miR-1827	0	0	1	0	0	0	ATP8B5P	ATPase, class I, type 8B, member 5, pseudogene
hsa-miR-1827	1	0	1	1	1	1	RCOR3	REST corepressor 3
hsa-miR-1827	0	0	1	1	0	0	KIAA1324	KIAA1324
hsa-miR-1827	1	0	1	1	1	1	BRD3	bromodomain containing 3
hsa-miR-1827	0	0	1	0	1	1	PLEKHM1P	pleckstrin homology domain containing, family M (with RUN domain) member 1 pseudogene
hsa-miR-1827	1	0	1	1	1	1	SF1	splicing factor 1
hsa-miR-1827	1	0	1	1	1	1	RAB5B	RAB5B, member RAS oncogene family
hsa-miR-1827	0	0	1	1	0	0	WASIR2	WASH and IL9R antisense RNA 2
hsa-miR-1827	1	0	1	1	1	1	SECISBP2L	SECIS binding protein 2-like
hsa-miR-1827	1	0	1	1	1	1	SIRPA	signal-regulatory protein alpha
hsa-miR-1827	1	0	1	1	1	1	CRKL	v-crk sarcoma virus CT10 oncogene homolog (avian)-like
hsa-miR-1827	0	0	1	1	0	0	LINC00176	long intergenic non-protein coding RNA 176
hsa-miR-1827	1	0	1	1	1	1	PCDHA5	protocadherin alpha 5
hsa-miR-1827	0	0	1	1	0	0	ADAP2	ArfGAP with dual PH domains 2
hsa-miR-1827	0	0	1	1	1	1	HEXA	hexosaminidase A (alpha polypeptide)
hsa-miR-1827	1	0	1	1	1	1	PAK4	p21 protein (Cdc42/Rac)-activated kinase 4
hsa-miR-1827	0	0	1	1	1	1	ZNF337	zinc finger protein 337
hsa-miR-1827	1	0	1	1	1	1	ZZZ3	zinc finger, ZZ-type containing 3
hsa-miR-1827	0	0	1	0	0	0	LOC643529	hCG2024094
hsa-miR-1827	0	0	1	0	1	1	TMSB15B	thymosin beta 15B
hsa-miR-1827	0	0	1	1	1	1	TMEM139	transmembrane protein 139
hsa-miR-1827	1	0	1	1	1	1	ZNF618	zinc finger protein 618
hsa-miR-1827	1	0	1	1	1	1	PEX5L	peroxisomal biogenesis factor 5-like
hsa-miR-1827	0	0	1	0	0	0	SPATA3	spermatogenesis associated 3
hsa-miR-1827	0	0	1	0	1	1	C9orf57	chromosome 9 open reading frame 57
hsa-miR-1827	0	0	1	0	0	0	LINC00642	long intergenic non-protein coding RNA 642
hsa-miR-1827	0	0	1	1	0	0	FAM3B	family with sequence similarity 3, member B
hsa-miR-1827	1	0	1	1	1	1	SLC35G1	solute carrier family 35, member G1
hsa-miR-1827	1	0	1	1	1	1	MACROD2	MACRO domain containing 2
hsa-miR-1827	0	0	1	1	1	1	FAM171B	family with sequence similarity 171, member B
hsa-miR-1827	0	0	1	0	0	0	ANKRD30BP2	ankyrin repeat domain 30B pseudogene 2
hsa-miR-1827	0	0	1	0	0	0	CYP4F35P	cytochrome P450, family 4, subfamily F, polypeptide 35, pseudogene
hsa-miR-1827	1	0	1	0	0	0	RAVER1	ribonucleoprotein, PTB-binding 1
hsa-miR-1827	1	0	1	1	0	0	EBF4	early B-cell factor 4
hsa-miR-1827	0	0	1	0	0	0	INHBA-AS1	INHBA antisense RNA 1
hsa-miR-1827	0	0	1	1	0	0	LAG3	lymphocyte-activation gene 3
hsa-miR-1827	1	0	1	0	1	1	KIAA0930	KIAA0930
hsa-miR-1827	1	0	1	1	1	1	DAAM1	dishevelled associated activator of morphogenesis 1
hsa-miR-1827	0	0	1	1	1	1	C14orf118	chromosome 14 open reading frame 118
hsa-miR-1827	0	0	1	0	1	1	APOL6	apolipoprotein L, 6
hsa-miR-1827	0	0	1	0	0	0	FLJ36000	uncharacterized FLJ36000
hsa-miR-1827	0	0	1	0	0	0	USP32P1	ubiquitin specific peptidase 32 pseudogene 1
hsa-miR-1827	0	0	1	0	0	0	DLGAP1-AS3	DLGAP1 antisense RNA 3
hsa-miR-1827	0	0	1	0	0	0	TOB1-AS1	TOB1 antisense RNA 1
hsa-miR-1827	0	0	1	0	0	0	LOC221122	uncharacterized LOC221122
hsa-miR-1827	0	0	1	0	1	1	LINC00634	long intergenic non-protein coding RNA 634
hsa-miR-1827	1	0	1	1	1	1	FOSB	FBJ murine osteosarcoma viral oncogene homolog B
hsa-miR-1827	1	0	1	1	1	1	BVES	blood vessel epicardial substance
hsa-miR-1827	0	0	1	0	1	1	PCBP1-AS1	PCBP1 antisense RNA 1
hsa-miR-1827	0	0	1	1	0	0	MTCH1	mitochondrial carrier 1
hsa-miR-1827	0	0	1	0	0	0	A1BG-AS1	A1BG antisense RNA 1
hsa-miR-1827	0	0	1	0	1	1	METTL12	methyltransferase like 12
hsa-miR-1827	1	0	1	1	1	1	LRRC4C	leucine rich repeat containing 4C
hsa-miR-1827	0	0	1	0	0	0	LOC154822	uncharacterized LOC154822
hsa-miR-1827	1	0	1	1	1	1	GNG2	guanine nucleotide binding protein (G protein), gamma 2
hsa-miR-1827	0	0	1	1	1	1	C17orf104	chromosome 17 open reading frame 104
hsa-miR-1827	1	0	1	1	0	0	INPP5J	inositol polyphosphate-5-phosphatase J
hsa-miR-1827	0	0	1	1	1	1	CARD8	caspase recruitment domain family, member 8
hsa-miR-1827	1	0	1	1	1	1	DOC2A	double C2-like domains, alpha
hsa-miR-1827	1	0	1	0	1	1	TNFAIP3	tumor necrosis factor, alpha-induced protein 3
hsa-miR-1827	0	0	1	1	1	1	GOLGA6L9	golgin A6 family-like 9
hsa-miR-1827	0	0	1	1	1	1	PGPEP1	pyroglutamyl-peptidase I
hsa-miR-1827	0	0	1	0	1	1	OAZ1	ornithine decarboxylase antizyme 1
hsa-miR-1827	0	0	1	0	0	0	LOC401176	uncharacterized LOC401176
hsa-miR-1827	0	0	1	0	0	0	LOC338579	ankyrin repeat domain-containing protein 30B pseudogene
hsa-miR-1827	1	0	1	1	1	1	ARHGAP30	Rho GTPase activating protein 30
hsa-miR-1827	0	0	1	0	0	0	LOC339260	uncharacterized LOC339260
hsa-miR-1827	0	0	1	0	0	0	DKFZp686O1327	uncharacterized LOC401014
hsa-miR-1827	1	0	1	0	1	1	PSD3	pleckstrin and Sec7 domain containing 3
hsa-miR-1827	1	0	1	1	1	1	MAMDC2	MAM domain containing 2
hsa-miR-1827	0	0	1	0	0	0	LOC283914	uncharacterized LOC283914
hsa-miR-1827	0	0	1	1	1	1	DOCK8	dedicator of cytokinesis 8
hsa-miR-1827	0	0	1	1	0	0	FAM165B	family with sequence similarity 165, member B
hsa-miR-1827	0	0	1	1	0	0	LILRA1	leukocyte immunoglobulin-like receptor, subfamily A (with TM domain), member 1
hsa-miR-1827	1	0	1	1	1	1	SLC39A9	solute carrier family 39 (zinc transporter), member 9
hsa-miR-1827	1	0	1	1	1	1	PALD1	phosphatase domain containing, paladin 1
hsa-miR-1827	0	0	1	1	0	0	FKBP11	FK506 binding protein 11, 19 kDa
hsa-miR-1827	1	0	1	1	1	1	PTPRG	protein tyrosine phosphatase, receptor type, G
hsa-miR-1827	0	0	1	1	1	1	INO80C	INO80 complex subunit C
hsa-miR-1827	1	0	1	1	1	1	RECK	reversion-inducing-cysteine-rich protein with kazal motifs
hsa-miR-1827	0	0	1	1	0	0	NLRC5	NLR family, CARD domain containing 5
hsa-miR-1827	0	0	1	1	0	0	NISCH	nischarin
hsa-miR-1827	1	0	1	0	1	1	NUDT10	nudix (nucleoside diphosphate linked moiety X)-type motif 10
hsa-miR-1827	1	0	1	0	1	1	SEMA4G	sema domain, immunoglobulin domain (Ig), transmembrane domain (TM) and short cytoplasmic domain, (semaphorin) 4G
hsa-miR-1827	0	0	1	1	1	1	LINC00086	long intergenic non-protein coding RNA 86
hsa-miR-1827	1	0	1	1	1	1	LIMD2	LIM domain containing 2
hsa-miR-1827	1	0	1	1	1	1	YWHAZ	tyrosine 3-monooxygenase/tryptophan 5-monooxygenase activation protein, zeta polypeptide
hsa-miR-1827	0	0	1	1	1	1	SLC25A35	solute carrier family 25, member 35
hsa-miR-1827	1	0	1	0	1	1	C14orf43	chromosome 14 open reading frame 43
hsa-miR-1827	1	0	1	1	1	1	HP1BP3	heterochromatin protein 1, binding protein 3
hsa-miR-1827	0	0	1	0	0	0	LINC00265	long intergenic non-protein coding RNA 265
hsa-miR-1827	0	0	1	1	0	0	TENC1	tensin like C1 domain containing phosphatase (tensin 2)
hsa-miR-1827	0	0	1	1	0	0	LYZL6	lysozyme-like 6
hsa-miR-1827	1	0	1	1	1	1	PRRG1	proline rich Gla (G-carboxyglutamic acid) 1
hsa-miR-1827	0	0	1	0	0	0	CISD3	CDGSH iron sulfur domain 3
hsa-miR-1827	0	0	1	0	0	0	LOC550643	uncharacterized LOC550643
hsa-miR-1827	0	0	1	1	0	0	PRR19	proline rich 19
hsa-miR-1827	1	0	1	1	1	1	PDGFRA	platelet-derived growth factor receptor, alpha polypeptide
hsa-miR-1827	1	0	1	1	1	1	ANXA4	annexin A4
hsa-miR-1827	0	0	1	1	1	1	C1orf109	chromosome 1 open reading frame 109
hsa-miR-1827	1	0	1	1	1	1	GANAB	glucosidase, alpha; neutral AB
hsa-miR-1827	0	0	1	1	1	1	TAGLN	transgelin
hsa-miR-1827	1	0	1	1	1	1	C18orf1	chromosome 18 open reading frame 1
hsa-miR-1827	1	0	1	1	1	1	AP3M1	adaptor-related protein complex 3, mu 1 subunit
hsa-miR-1827	1	0	1	1	1	1	NRSN1	neurensin 1
hsa-miR-1827	1	0	1	1	1	1	FAM129B	family with sequence similarity 129, member B
hsa-miR-1827	0	0	1	1	0	0	LNP1	leukemia NUP98 fusion partner 1
hsa-miR-1827	0	0	1	1	0	0	CELF3	CUGBP, Elav-like family member 3
hsa-miR-1827	0	0	1	1	1	1	IL1RN	interleukin 1 receptor antagonist
hsa-miR-1827	1	0	1	1	1	1	MAPKAPK3	mitogen-activated protein kinase-activated protein kinase 3
hsa-miR-1827	1	0	1	1	0	0	TMEM198	transmembrane protein 198
hsa-miR-1827	0	0	1	1	1	1	TTLL9	tubulin tyrosine ligase-like family, member 9
hsa-miR-1827	0	0	1	0	0	0	C17orf69	chromosome 17 open reading frame 69
hsa-miR-1827	0	0	1	1	0	0	TRIM46	tripartite motif containing 46
hsa-miR-1827	0	0	1	0	0	0	FOXN3-AS2	FOXN3 antisense RNA 2
hsa-miR-1827	0	0	1	1	0	0	CYP4F30P	cytochrome P450, family 4, subfamily F, polypeptide 30, pseudogene
hsa-miR-1827	0	0	1	1	1	1	MSTO1	misato homolog 1 (Drosophila)
hsa-miR-1827	1	0	1	0	1	1	TGFBR1	transforming growth factor, beta receptor 1
hsa-miR-1827	1	0	1	0	1	1	TMEM194A	transmembrane protein 194A
hsa-miR-1827	0	0	1	1	1	1	TNFSF12	tumor necrosis factor (ligand) superfamily, member 12
hsa-miR-1827	0	0	1	1	0	0	TRIM41	tripartite motif containing 41
hsa-miR-1827	0	0	1	1	0	0	S100A1	S100 calcium binding protein A1
hsa-miR-1827	0	0	1	1	1	1	FRMPDP2	FERM and PDZ domain containing 2 pseudogene 2
hsa-miR-1827	0	0	1	1	1	1	FRMPD2P1	FERM and PDZ domain containing 2 pseudogene 1
hsa-miR-1827	0	0	1	1	1	1	HEATR2	HEAT repeat containing 2
hsa-miR-1827	0	0	1	1	1	1	PCED1B	PC-esterase domain containing 1B
hsa-miR-1827	0	0	1	1	0	0	TRIM73	tripartite motif containing 73
hsa-miR-1827	0	0	1	0	0	0	PHKA2-AS1	PHKA2 antisense RNA 1
hsa-miR-1827	1	0	1	1	1	1	WBP1L	WW domain binding protein 1-like
hsa-miR-1827	0	0	1	0	1	1	SH3RF2	SH3 domain containing ring finger 2
hsa-miR-1827	0	0	1	1	0	0	C8orf82	chromosome 8 open reading frame 82
hsa-miR-1827	1	0	1	1	1	1	OPCML	opioid binding protein/cell adhesion molecule-like
hsa-miR-1827	1	0	1	1	1	1	WNT5A	wingless-type MMTV integration site family, member 5A
hsa-miR-1827	0	0	1	0	0	0	LOC441259	PMS2 postmeiotic segregation increased 2 (S. cerevisiae)-like
hsa-miR-1827	0	0	1	1	1	1	C3orf67	chromosome 3 open reading frame 67
hsa-miR-1827	0	0	1	0	0	0	LOC642846	DEAD/H (Asp-Glu-Ala-Asp/His) box polypeptide 11-like
hsa-miR-1827	1	0	1	0	1	1	AMMECR1L	AMME chromosomal region gene 1-like
hsa-miR-1827	0	0	1	0	0	0	LINC00537	long intergenic non-protein coding RNA 537
hsa-miR-1827	1	0	1	1	1	1	SAMD4B	sterile alpha motif domain containing 4B
hsa-miR-1827	0	0	1	0	0	0	TBC1D25	TBC1 domain family, member 25
hsa-miR-1827	0	0	1	1	0	0	DNHD1	dynein heavy chain domain 1
hsa-miR-1827	1	0	1	1	1	1	ZBTB7A	zinc finger and BTB domain containing 7A
hsa-miR-1827	1	0	1	1	1	1	HNRNPC	heterogeneous nuclear ribonucleoprotein C (C1/C2)
hsa-miR-1827	1	0	1	1	0	0	SLC45A4	solute carrier family 45, member 4
hsa-miR-1827	1	0	1	1	1	1	ZMYND8	zinc finger, MYND-type containing 8
hsa-miR-1827	1	0	1	1	1	1	ESRRA	estrogen-related receptor alpha
hsa-miR-1827	1	0	1	1	1	1	TRPM3	transient receptor potential cation channel, subfamily M, member 3
hsa-miR-1827	1	0	1	1	1	1	PLXNA2	plexin A2
hsa-miR-1827	1	0	1	1	1	1	ST8SIA2	ST8 alpha-N-acetyl-neuraminide alpha-2,8-sialyltransferase 2
hsa-miR-1827	1	0	1	1	1	1	ACVR2B	activin A receptor, type IIB
hsa-miR-1827	0	0	1	1	0	0	EDDM3A	epididymal protein 3A
hsa-miR-1827	1	0	1	0	1	1	ARPP19	cAMP-regulated phosphoprotein, 19kDa
hsa-miR-1827	0	0	1	1	1	1	XG	Xg blood group
hsa-miR-1827	0	0	1	0	0	0	CCDC163P	coiled-coil domain containing 163, pseudogene
hsa-miR-1827	1	0	1	0	1	1	VANGL2	vang-like 2 (van gogh, Drosophila)
hsa-miR-1827	0	0	1	0	0	0	LSAMP-AS3	LSAMP antisense RNA 3
hsa-miR-1827	1	0	1	1	1	1	PHKA1	phosphorylase kinase, alpha 1 (muscle)
hsa-miR-1827	1	0	1	1	1	1	ZNF763	zinc finger protein 763
hsa-miR-1827	1	0	1	1	1	1	KLHL17	kelch-like 17 (Drosophila)
hsa-miR-1827	1	0	1	0	1	1	RBM23	RNA binding motif protein 23
hsa-miR-1827	0	0	1	1	1	1	PAX4	paired box 4
hsa-miR-1827	0	0	1	0	0	0	TPTEP1	transmembrane phosphatase with tensin homology pseudogene 1
hsa-miR-1827	1	0	1	0	1	1	BTBD3	BTB (POZ) domain containing 3
hsa-miR-1827	0	0	1	1	1	1	GOLGA2P5	golgin A2 pseudogene 5
hsa-miR-1827	0	0	1	1	0	0	RELA	v-rel reticuloendotheliosis viral oncogene homolog A (avian)
hsa-miR-1827	0	0	1	1	1	1	RBM25	RNA binding motif protein 25
hsa-miR-1827	1	0	1	1	1	1	NR3C2	nuclear receptor subfamily 3, group C, member 2
hsa-miR-1827	0	0	1	1	1	1	UNC13B	unc-13 homolog B (C. elegans)
hsa-miR-1827	0	0	1	1	0	0	RNF123	ring finger protein 123
hsa-miR-1827	0	0	1	1	1	1	FSHB	follicle stimulating hormone, beta polypeptide
hsa-miR-1827	0	0	1	1	0	0	C14orf178	chromosome 14 open reading frame 178
hsa-miR-1827	1	0	1	1	0	0	MAPKBP1	mitogen-activated protein kinase binding protein 1
hsa-miR-1827	0	0	1	0	0	0	LOC286094	uncharacterized LOC286094
hsa-miR-1827	0	0	1	1	0	0	SOCS7	suppressor of cytokine signaling 7
hsa-miR-1827	0	0	1	0	0	0	LINC00266-1	long intergenic non-protein coding RNA 266-1
hsa-miR-1827	0	0	1	1	1	1	C9orf171	chromosome 9 open reading frame 171
hsa-miR-1827	0	0	1	1	0	0	HSF4	heat shock transcription factor 4
hsa-miR-1827	0	0	1	0	0	0	FAM225B	family with sequence similarity 225, member B (non-protein coding)
hsa-miR-1827	0	0	1	1	0	0	C5orf60	chromosome 5 open reading frame 60
hsa-miR-1827	0	0	1	1	0	0	EPS15L1	epidermal growth factor receptor pathway substrate 15-like 1
hsa-miR-1827	0	0	1	0	0	0	LILRP2	leukocyte immunoglobulin-like receptor pseudogene 2
hsa-miR-1827	0	0	1	1	0	0	TCHH	trichohyalin
hsa-miR-1827	0	0	1	1	1	1	LGMN	legumain
hsa-miR-1827	0	0	1	1	1	1	TINF2	TERF1 (TRF1)-interacting nuclear factor 2
hsa-miR-1827	0	0	1	1	1	1	HAUS4	HAUS augmin-like complex, subunit 4
hsa-miR-1827	1	0	1	1	1	1	NUMB	numb homolog (Drosophila)
hsa-miR-1827	0	0	1	0	0	0	FLJ39632	uncharacterized LOC642477
hsa-miR-1827	1	0	1	1	1	1	LITAF	lipopolysaccharide-induced TNF factor
hsa-miR-1827	1	0	1	1	0	0	KRT80	keratin 80
hsa-miR-1827	1	0	1	1	1	1	MAPK3	mitogen-activated protein kinase 3
hsa-miR-1827	0	0	1	1	1	1	AIG1	androgen-induced 1
hsa-miR-1827	1	0	1	1	1	1	SLC35F1	solute carrier family 35, member F1
hsa-miR-1827	0	0	1	1	1	1	DEPDC5	DEP domain containing 5
hsa-miR-1827	0	0	1	1	0	0	CDK5RAP2	CDK5 regulatory subunit associated protein 2
hsa-miR-1827	0	0	1	0	0	0	PCNXL3	pecanex-like 3 (Drosophila)
hsa-miR-1827	1	0	1	1	1	1	PRKRIR	protein-kinase, interferon-inducible double stranded RNA dependent inhibitor, repressor of (P58 repressor)
hsa-miR-1827	0	0	1	1	1	1	GTF3C2	general transcription factor IIIC, polypeptide 2, beta 110kDa
hsa-miR-1827	1	0	1	1	1	1	PRDM2	PR domain containing 2, with ZNF domain
hsa-miR-1827	1	0	1	1	1	1	EPS15	epidermal growth factor receptor pathway substrate 15
hsa-miR-1827	1	0	1	1	1	1	CYB5B	cytochrome b5 type B (outer mitochondrial membrane)
hsa-miR-1827	1	0	1	1	1	1	NFIB	nuclear factor I/B
hsa-miR-1827	1	0	1	1	1	1	SOGA2	SOGA family member 2
hsa-miR-1827	1	0	1	1	1	1	NAV1	neuron navigator 1
hsa-miR-1827	1	0	1	0	1	1	IGF2BP3	insulin-like growth factor 2 mRNA binding protein 3
hsa-miR-1827	1	0	1	1	1	1	ZKSCAN5	zinc finger with KRAB and SCAN domains 5
hsa-miR-1827	1	0	1	1	1	1	CALD1	caldesmon 1
hsa-miR-1827	0	0	1	1	0	0	CEP152	centrosomal protein 152kDa
hsa-miR-1827	0	0	1	1	1	1	SSFA2	sperm specific antigen 2
hsa-miR-1827	0	0	1	1	1	1	C4orf40	chromosome 4 open reading frame 40
hsa-miR-1827	1	0	1	1	1	1	ASB6	ankyrin repeat and SOCS box containing 6
hsa-miR-1827	0	0	1	0	0	0	DKFZp686K1684	uncharacterized LOC440034
hsa-miR-1827	1	0	1	1	1	1	LYST	lysosomal trafficking regulator
hsa-miR-1827	0	0	1	1	1	1	IPO11	importin 11
hsa-miR-1827	1	0	1	1	1	1	SIN3A	SIN3 transcription regulator homolog A (yeast)
hsa-miR-1827	0	0	1	1	1	1	PICK1	protein interacting with PRKCA 1
hsa-miR-1827	0	0	1	0	0	0	LINC00341	long intergenic non-protein coding RNA 341
hsa-miR-1827	0	0	1	1	1	1	C6orf223	chromosome 6 open reading frame 223
hsa-miR-1827	0	0	1	1	1	1	HPGD	hydroxyprostaglandin dehydrogenase 15-(NAD)
hsa-miR-1827	1	0	1	1	1	1	ARHGDIA	Rho GDP dissociation inhibitor (GDI) alpha
hsa-miR-1827	0	0	1	1	0	0	CSH1	chorionic somatomammotropin hormone 1 (placental lactogen)
hsa-miR-1827	1	0	1	1	1	1	ADD2	adducin 2 (beta)
hsa-miR-1827	1	0	1	1	0	0	TOE1	target of EGR1, member 1 (nuclear)
hsa-miR-1827	1	0	1	0	1	1	RNF144A	ring finger protein 144A
hsa-miR-1827	1	0	1	0	0	0	IGLON5	IgLON family member 5
hsa-miR-1827	1	0	1	1	1	1	ARF1	ADP-ribosylation factor 1
hsa-miR-1827	0	0	1	1	0	0	HSD3B1	hydroxy-delta-5-steroid dehydrogenase, 3 beta- and steroid delta-isomerase 1
hsa-miR-1827	0	0	1	1	0	0	SARS	seryl-tRNA synthetase
hsa-miR-1827	0	0	1	0	0	0	RPS16P10	ribosomal protein S16 pseudogene 10
hsa-miR-1827	1	0	1	1	1	1	TARBP2	TAR (HIV-1) RNA binding protein 2
hsa-miR-1827	1	0	1	1	1	1	POU2F3	POU class 2 homeobox 3
hsa-miR-1827	1	0	1	1	1	1	MMAB	methylmalonic aciduria (cobalamin deficiency) cblB type
hsa-miR-1827	0	0	1	0	0	0	LOC400768	uncharacterized LOC400768
hsa-miR-1827	0	0	1	1	1	1	IER3	immediate early response 3
hsa-miR-1827	0	0	1	1	0	0	PSG8	pregnancy specific beta-1-glycoprotein 8
hsa-miR-1827	1	0	1	1	1	1	C8orf58	chromosome 8 open reading frame 58
hsa-miR-1827	0	0	1	1	1	1	CYTH2	cytohesin 2
hsa-miR-1827	0	0	1	1	0	0	FCGRT	Fc fragment of IgG, receptor, transporter, alpha
hsa-miR-1827	1	0	1	1	1	1	DOLPP1	dolichyl pyrophosphate phosphatase 1
hsa-miR-1827	0	0	1	0	0	0	ARRDC1	arrestin domain containing 1
hsa-miR-1827	0	0	1	1	0	0	CCNDBP1	cyclin D-type binding-protein 1
hsa-miR-1827	0	0	1	1	0	0	NOP56	NOP56 ribonucleoprotein homolog (yeast)
hsa-miR-1827	0	0	1	0	0	0	H19	H19, imprinted maternally expressed transcript (non-protein coding)
hsa-miR-1827	0	0	1	1	1	1	BCL7B	B-cell CLL/lymphoma 7B
hsa-miR-1827	0	0	1	1	0	0	NGDN	neuroguidin, EIF4E binding protein
hsa-miR-1827	1	0	1	1	1	1	SSR1	signal sequence receptor, alpha
hsa-miR-1827	0	0	1	1	0	0	DNAJB2	DnaJ (Hsp40) homolog, subfamily B, member 2
hsa-miR-1827	0	0	1	1	0	0	MYL6	myosin, light chain 6, alkali, smooth muscle and non-muscle
hsa-miR-1827	0	0	1	1	0	0	NSUN5P2	NOP2/Sun domain family, member 5 pseudogene 2
hsa-miR-1827	0	0	1	1	1	1	IFNGR2	interferon gamma receptor 2 (interferon gamma transducer 1)
hsa-miR-1827	1	0	1	1	1	1	COPZ1	coatomer protein complex, subunit zeta 1
hsa-miR-1827	0	0	1	1	0	0	F10	coagulation factor X
hsa-miR-1827	0	0	1	1	1	1	CCDC115	coiled-coil domain containing 115
hsa-miR-1827	0	0	1	1	1	1	ALB	albumin
hsa-miR-1827	0	0	1	1	1	1	GRAP2	GRB2-related adaptor protein 2
hsa-miR-1827	0	0	1	1	1	1	DRG2	developmentally regulated GTP binding protein 2
hsa-miR-1827	0	0	1	1	1	1	STON1	stonin 1
hsa-miR-1827	1	0	1	1	1	1	POU2F2	POU class 2 homeobox 2
hsa-miR-1827	0	0	1	1	1	1	C17orf76-AS1	C17orf76 antisense RNA 1
hsa-miR-1827	0	0	1	0	0	0	LOC643072	uncharacterized LOC643072
hsa-miR-1827	0	0	1	1	1	1	TRIM68	tripartite motif containing 68
hsa-miR-1827	1	0	1	1	1	1	LYPLA2	lysophospholipase II
hsa-miR-1827	0	0	1	0	0	0	TMEM208	transmembrane protein 208
hsa-miR-1827	0	0	1	1	0	0	NDUFS7	NADH dehydrogenase (ubiquinone) Fe-S protein 7, 20kDa (NADH-coenzyme Q reductase)
hsa-miR-1827	0	0	1	1	0	0	C11orf73	chromosome 11 open reading frame 73
hsa-miR-1827	0	0	1	1	0	0	BRE	brain and reproductive organ-expressed (TNFRSF1A modulator)
hsa-miR-1827	0	0	1	1	1	1	GLRX3	glutaredoxin 3
hsa-miR-1827	0	0	1	0	1	1	RASA4	RAS p21 protein activator 4
hsa-miR-1827	0	0	1	0	0	0	LOC677759	uncharacterized LOC677759
hsa-miR-1827	0	0	1	1	0	0	LILRB4	leukocyte immunoglobulin-like receptor, subfamily B (with TM and ITIM domains), member 4
hsa-miR-1827	0	0	1	1	0	0	CSF3R	colony stimulating factor 3 receptor (granulocyte)
hsa-miR-1827	1	0	1	1	1	1	TAGLN2	transgelin 2
hsa-miR-1827	0	0	1	1	1	1	CPZ	carboxypeptidase Z
hsa-miR-1827	1	0	1	1	1	1	ARNTL	aryl hydrocarbon receptor nuclear translocator-like
hsa-miR-1827	0	0	1	1	0	0	WDR43	WD repeat domain 43
hsa-miR-1827	0	0	1	1	1	1	TRMT61B	tRNA methyltransferase 61 homolog B (S. cerevisiae)
hsa-miR-1827	1	0	1	1	1	1	CAMK2A	calcium/calmodulin-dependent protein kinase II alpha
hsa-miR-1827	0	0	1	1	0	0	RGS9	regulator of G-protein signaling 9
hsa-miR-1827	1	0	1	1	0	0	WBP2	WW domain binding protein 2
hsa-miR-1827	0	0	1	1	1	1	FKBP1B	FK506 binding protein 1B, 12.6 kDa
hsa-miR-1827	0	0	1	1	1	1	NOLC1	nucleolar and coiled-body phosphoprotein 1
hsa-miR-1827	1	0	1	1	1	1	BAALC	brain and acute leukemia, cytoplasmic
hsa-miR-1827	0	0	1	1	1	1	ACSF3	acyl-CoA synthetase family member 3
hsa-miR-1827	0	0	1	1	0	0	C9orf114	chromosome 9 open reading frame 114
hsa-miR-1827	0	0	1	1	0	0	AHSG	alpha-2-HS-glycoprotein
hsa-miR-1827	0	0	1	1	1	1	SLCO4A1	solute carrier organic anion transporter family, member 4A1
hsa-miR-1827	0	0	1	1	1	1	STRAP	serine/threonine kinase receptor associated protein
hsa-miR-1827	0	0	1	1	1	1	NFKBIB	nuclear factor of kappa light polypeptide gene enhancer in B-cells inhibitor, beta
hsa-miR-1827	0	0	1	0	0	0	ZNF674-AS1	ZNF674 antisense RNA 1
hsa-miR-1827	0	0	1	1	0	0	RNASEH2A	ribonuclease H2, subunit A
hsa-miR-1827	1	0	1	1	1	1	RBFOX2	RNA binding protein, fox-1 homolog (C. elegans) 2
hsa-miR-1827	0	0	1	1	0	0	BCKDK	branched chain ketoacid dehydrogenase kinase
hsa-miR-1827	0	0	1	1	1	1	HS3ST2	heparan sulfate (glucosamine) 3-O-sulfotransferase 2
hsa-miR-1827	1	0	1	1	0	0	STAG3L4	stromal antigen 3-like 4
hsa-miR-1827	0	0	1	1	1	1	TSEN15	tRNA splicing endonuclease 15 homolog (S. cerevisiae)
hsa-miR-1827	1	0	1	1	1	1	MFSD2A	major facilitator superfamily domain containing 2A
hsa-miR-1827	0	0	1	1	0	0	RAMP2	receptor (G protein-coupled) activity modifying protein 2
hsa-miR-1827	1	0	1	0	1	1	CD47	CD47 molecule
hsa-miR-1827	0	0	1	0	0	0	PRMT1	protein arginine methyltransferase 1
hsa-miR-1827	1	0	1	1	1	1	RUNX1	runt-related transcription factor 1
hsa-miR-1827	1	0	1	1	0	0	CGREF1	cell growth regulator with EF-hand domain 1
hsa-miR-1827	0	0	1	1	0	0	TESK1	testis-specific kinase 1
hsa-miR-1827	1	0	1	1	1	1	TIPRL	TIP41, TOR signaling pathway regulator-like (S. cerevisiae)
hsa-miR-1827	0	0	1	0	0	0	LOC100132984	uncharacterized LOC100132984
hsa-miR-1827	0	0	1	1	1	1	C10orf2	chromosome 10 open reading frame 2
hsa-miR-1827	0	0	1	1	0	0	IL11RA	interleukin 11 receptor, alpha
hsa-miR-1827	1	0	1	1	1	1	SERF2	small EDRK-rich factor 2
hsa-miR-1827	1	0	1	1	1	1	FBXW7	F-box and WD repeat domain containing 7, E3 ubiquitin protein ligase
hsa-miR-1827	0	0	1	1	1	1	UPRT	uracil phosphoribosyltransferase (FUR1) homolog (S. cerevisiae)
hsa-miR-1827	0	0	1	1	1	1	MRPL42	mitochondrial ribosomal protein L42
hsa-miR-1827	0	0	1	0	0	0	LINC00661	long intergenic non-protein coding RNA 661
hsa-miR-1827	1	0	1	1	1	1	ANKS6	ankyrin repeat and sterile alpha motif domain containing 6
hsa-miR-1827	1	0	1	0	1	1	XRN1	5'-3' exoribonuclease 1
hsa-miR-1827	0	0	1	1	1	1	SLC25A26	solute carrier family 25 (S-adenosylmethionine carrier), member 26
hsa-miR-1827	1	0	1	1	0	0	PRRC2B	proline-rich coiled-coil 2B
hsa-miR-1827	0	0	1	0	0	0	DNAJC27-AS1	DNAJC27 antisense RNA 1
hsa-miR-1827	1	0	1	1	1	1	BCL2L1	BCL2-like 1
hsa-miR-1827	1	0	1	1	1	1	SLC30A7	solute carrier family 30 (zinc transporter), member 7
hsa-miR-1827	1	0	1	1	1	1	RBPJ	recombination signal binding protein for immunoglobulin kappa J region
hsa-miR-1827	1	0	1	1	1	1	MAN2A2	mannosidase, alpha, class 2A, member 2
hsa-miR-1827	1	0	1	1	1	1	SEC14L1	SEC14-like 1 (S. cerevisiae)
hsa-miR-1827	1	0	1	1	1	1	RBPMS	RNA binding protein with multiple splicing
hsa-miR-1827	1	0	1	0	1	1	KLHDC10	kelch domain containing 10
hsa-miR-1827	0	0	1	1	1	1	LTA	lymphotoxin alpha (TNF superfamily, member 1)
hsa-miR-1827	0	0	1	1	0	0	SPATA20	spermatogenesis associated 20
hsa-miR-1827	1	0	1	1	1	1	MOSPD1	motile sperm domain containing 1
hsa-miR-1827	1	0	1	0	1	1	MAP2K7	mitogen-activated protein kinase kinase 7
hsa-miR-1827	1	0	1	1	1	1	ITSN1	intersectin 1 (SH3 domain protein)
hsa-miR-1827	0	0	1	1	1	1	HOOK2	hook homolog 2 (Drosophila)
hsa-miR-1827	0	0	1	0	0	0	C1orf81	chromosome 1 open reading frame 81
hsa-miR-1827	0	0	1	1	1	1	ALDH3B1	aldehyde dehydrogenase 3 family, member B1
hsa-miR-1827	1	0	1	1	1	1	MLL	myeloid/lymphoid or mixed-lineage leukemia (trithorax homolog, Drosophila)
hsa-miR-1827	1	0	1	1	1	1	AFF1	AF4/FMR2 family, member 1
hsa-miR-1827	1	0	1	1	1	1	RALBP1	ralA binding protein 1
hsa-miR-1827	1	0	1	1	1	1	IGF1	insulin-like growth factor 1 (somatomedin C)
hsa-miR-1827	0	0	1	1	1	1	NPR3	natriuretic peptide receptor C/guanylate cyclase C (atrionatriuretic peptide receptor C)
hsa-miR-1827	1	0	1	1	1	1	FAS	Fas (TNF receptor superfamily, member 6)
hsa-miR-1827	0	0	1	1	1	1	ERCC8	excision repair cross-complementing rodent repair deficiency, complementation group 8
hsa-miR-1827	1	0	1	1	1	1	COL4A3	collagen, type IV, alpha 3 (Goodpasture antigen)
hsa-miR-1827	1	0	1	1	1	1	CYP19A1	cytochrome P450, family 19, subfamily A, polypeptide 1
hsa-miR-1827	1	0	1	1	1	1	ESR1	estrogen receptor 1
hsa-miR-1827	0	0	1	0	1	1	MS4A2	membrane-spanning 4-domains, subfamily A, member 2
hsa-miR-1827	0	0	1	1	1	1	FXN	frataxin
hsa-miR-1827	0	0	1	1	0	0	GJB1	gap junction protein, beta 1, 32kDa
hsa-miR-1827	1	0	1	0	1	1	ITGB3	integrin, beta 3 (platelet glycoprotein IIIa, antigen CD61)
hsa-miR-1827	1	0	1	1	1	1	KCNA1	potassium voltage-gated channel, shaker-related subfamily, member 1 (episodic ataxia with myokymia)
hsa-miR-1827	1	0	1	1	1	1	MITF	microphthalmia-associated transcription factor
hsa-miR-1827	1	0	1	1	1	1	OCRL	oculocerebrorenal syndrome of Lowe
hsa-miR-1827	1	0	1	1	1	1	TIMP3	TIMP metallopeptidase inhibitor 3
hsa-miR-1827	1	1	1	1	1	1	CDKN1A	cyclin-dependent kinase inhibitor 1A (p21, Cip1)
hsa-miR-1827	1	0	1	0	1	1	COL5A2	collagen, type V, alpha 2
hsa-miR-1827	1	0	1	0	1	1	CYBB	cytochrome b-245, beta polypeptide
hsa-miR-1827	0	0	1	1	0	0	KRT5	keratin 5
hsa-miR-1827	0	0	1	1	1	1	L1CAM	L1 cell adhesion molecule
hsa-miR-1827	0	0	1	1	1	1	LTBP2	latent transforming growth factor beta binding protein 2
hsa-miR-1827	1	0	1	1	1	1	RFX5	regulatory factor X, 5 (influences HLA class II expression)
hsa-miR-1827	0	0	1	0	1	1	SLC10A2	solute carrier family 10 (sodium/bile acid cotransporter family), member 2
hsa-miR-1827	0	0	1	1	0	0	OPN1MW	opsin 1 (cone pigments), medium-wave-sensitive
hsa-miR-1827	1	0	1	1	1	1	MPZ	myelin protein zero
hsa-miR-1827	0	0	1	1	1	1	IGF2	insulin-like growth factor 2 (somatomedin A)
hsa-miR-1827	0	0	1	1	1	1	NOS1	nitric oxide synthase 1 (neuronal)
hsa-miR-1827	0	0	1	0	1	1	ADRA2A	adrenoceptor alpha 2A
hsa-miR-1827	1	0	1	0	1	1	ADRA2B	adrenoceptor alpha 2B
hsa-miR-1827	0	0	1	1	0	0	CA4	carbonic anhydrase IV
hsa-miR-1827	1	0	1	0	1	1	CACNA1E	calcium channel, voltage-dependent, R type, alpha 1E subunit
hsa-miR-1827	0	0	1	1	1	1	CGA	glycoprotein hormones, alpha polypeptide
hsa-miR-1827	1	0	1	1	1	1	CHRM1	cholinergic receptor, muscarinic 1
hsa-miR-1827	1	0	1	1	1	1	HTR4	5-hydroxytryptamine (serotonin) receptor 4, G protein-coupled
hsa-miR-1827	1	0	1	1	1	1	IGF1R	insulin-like growth factor 1 receptor
hsa-miR-1827	0	0	1	1	0	0	KNG1	kininogen 1
hsa-miR-1827	1	0	1	1	1	1	MME	membrane metallo-endopeptidase
hsa-miR-1827	0	0	1	1	1	1	NPR1	natriuretic peptide receptor A/guanylate cyclase A (atrionatriuretic peptide receptor A)
hsa-miR-1827	0	0	1	0	0	0	PRIM1	primase, DNA, polypeptide 1 (49kDa)
hsa-miR-1827	0	0	1	0	1	1	PTGIS	prostaglandin I2 (prostacyclin) synthase
hsa-miR-1827	1	0	1	1	1	1	RARA	retinoic acid receptor, alpha
hsa-miR-1827	1	0	1	1	1	1	RARB	retinoic acid receptor, beta
hsa-miR-1827	1	0	1	1	0	0	SLC35E4	solute carrier family 35, member E4
hsa-miR-1827	1	0	1	1	1	1	RORC	RAR-related orphan receptor C
hsa-miR-1827	1	0	1	0	1	1	SPOPL	speckle-type POZ protein-like
hsa-miR-1827	0	0	1	1	1	1	FLJ45079	FLJ45079 protein
hsa-miR-1827	0	0	1	0	1	1	C9orf170	chromosome 9 open reading frame 170
hsa-miR-1827	1	0	1	0	1	1	CLDN18	claudin 18
hsa-miR-1827	1	0	1	1	0	0	AWAT2	acyl-CoA wax alcohol acyltransferase 2
hsa-miR-1827	1	0	1	1	1	1	GATA3	GATA binding protein 3
hsa-miR-1827	1	0	1	1	1	1	DNAJB12	DnaJ (Hsp40) homolog, subfamily B, member 12
hsa-miR-1827	0	0	1	1	1	1	SMAD1	SMAD family member 1
hsa-miR-1827	1	0	1	1	1	1	KLHL31	kelch-like 31 (Drosophila)
hsa-miR-1827	1	0	1	1	0	0	DLGAP1	discs, large (Drosophila) homolog-associated protein 1
hsa-miR-1827	1	0	1	0	1	1	BMF	Bcl2 modifying factor
hsa-miR-1827	0	0	1	1	1	1	ANXA13	annexin A13
hsa-miR-1827	0	0	1	1	1	1	CCDC144NL	coiled-coil domain containing 144 family, N-terminal like
hsa-miR-1827	0	0	1	0	0	0	FLJ42842	uncharacterized FLJ42842
hsa-miR-1827	0	0	1	1	1	1	MTHFD2L	methylenetetrahydrofolate dehydrogenase (NADP+ dependent) 2-like
hsa-miR-1827	1	0	1	0	1	1	LRRC55	leucine rich repeat containing 55
hsa-miR-1827	0	0	1	1	1	1	FRG2	FSHD region gene 2
hsa-miR-1827	1	0	1	1	1	1	ACTR2	ARP2 actin-related protein 2 homolog (yeast)
hsa-miR-1827	1	0	1	1	1	1	EBF3	early B-cell factor 3
hsa-miR-1827	1	0	1	1	1	1	EDA	ectodysplasin A
hsa-miR-1827	0	0	1	1	1	1	SCP2	sterol carrier protein 2
hsa-miR-1827	0	0	1	0	1	1	GIMAP6	GTPase, IMAP family member 6
hsa-miR-1827	1	0	1	1	1	1	SPOP	speckle-type POZ protein
hsa-miR-1827	0	0	1	1	1	1	TRIM13	tripartite motif containing 13
hsa-miR-1827	0	0	1	1	0	0	F8A3	coagulation factor VIII-associated 3
hsa-miR-1827	1	0	1	0	1	1	C18orf25	chromosome 18 open reading frame 25
hsa-miR-1827	1	0	1	1	1	1	CTDSPL	CTD (carboxy-terminal domain, RNA polymerase II, polypeptide A) small phosphatase-like
hsa-miR-1827	1	0	1	1	1	1	BCAP29	B-cell receptor-associated protein 29
hsa-miR-1827	0	0	1	1	1	1	MXRA7	matrix-remodelling associated 7
hsa-miR-1827	1	0	1	0	1	1	KIAA2022	KIAA2022
hsa-miR-1827	0	0	1	1	0	0	TCOF1	Treacher Collins-Franceschetti syndrome 1
hsa-miR-1827	1	0	1	1	1	1	LPHN1	latrophilin 1
hsa-miR-1827	0	0	1	1	1	1	FBXO47	F-box protein 47
hsa-miR-1827	0	0	1	1	1	1	ZCCHC11	zinc finger, CCHC domain containing 11
hsa-miR-1827	0	0	1	0	1	1	ZNF648	zinc finger protein 648
hsa-miR-1827	1	0	1	0	1	1	BACH1	BTB and CNC homology 1, basic leucine zipper transcription factor 1
hsa-miR-1827	1	0	1	0	1	1	CREB5	cAMP responsive element binding protein 5
hsa-miR-1827	1	0	1	1	1	1	CTNNBIP1	catenin, beta interacting protein 1
hsa-miR-1827	1	0	1	1	1	1	NTRK3	neurotrophic tyrosine kinase, receptor, type 3
hsa-miR-1827	1	0	1	1	1	1	FOXP4	forkhead box P4
hsa-miR-1827	0	0	1	1	0	0	MYPOP	Myb-related transcription factor, partner of profilin
hsa-miR-1827	1	0	1	1	1	1	SLC25A53	solute carrier family 25, member 53
hsa-miR-1827	1	0	1	1	1	1	PABPC1L2A	poly(A) binding protein, cytoplasmic 1-like 2A
hsa-miR-1827	1	0	1	0	1	1	ZKSCAN2	zinc finger with KRAB and SCAN domains 2
hsa-miR-1827	0	0	1	1	1	1	C9orf152	chromosome 9 open reading frame 152
hsa-miR-1827	1	0	1	1	1	1	C12orf68	chromosome 12 open reading frame 68
hsa-miR-1827	1	0	1	1	1	1	TRNP1	TMF1-regulated nuclear protein 1
hsa-miR-1827	0	0	1	1	1	1	C2orf68	chromosome 2 open reading frame 68
hsa-miR-1827	0	0	1	0	1	1	LINC00268	long intergenic non-protein coding RNA 268
hsa-miR-1827	0	0	1	0	0	0	LOC441956	uncharacterized LOC441956
hsa-miR-1827	1	0	1	1	1	1	CA7	carbonic anhydrase VII
hsa-miR-1827	1	0	1	1	1	1	NCDN	neurochondrin
hsa-miR-1827	1	0	1	1	1	1	RUNX2	runt-related transcription factor 2
hsa-miR-1827	0	0	1	1	1	1	PURG	purine-rich element binding protein G
hsa-miR-1827	0	0	1	1	1	1	BTBD11	BTB (POZ) domain containing 11
hsa-miR-1827	0	0	1	1	0	0	DAPL1	death associated protein-like 1
hsa-miR-1827	1	0	1	1	1	1	ZHX1	zinc fingers and homeoboxes 1
hsa-miR-1827	0	0	1	1	1	1	RAB28	RAB28, member RAS oncogene family
hsa-miR-1827	0	0	1	1	1	1	NARG2	NMDA receptor regulated 2
hsa-miR-1827	0	0	1	1	0	0	RPS19	ribosomal protein S19
hsa-miR-1827	1	0	1	1	1	1	IQCB1	IQ motif containing B1
hsa-miR-1827	1	0	1	0	1	1	RGAG4	retrotransposon gag domain containing 4
hsa-miR-1827	1	0	1	1	1	1	CANX	calnexin
hsa-miR-1827	1	0	1	1	1	1	SH3KBP1	SH3-domain kinase binding protein 1
hsa-miR-1827	1	0	1	1	1	1	TGFBR2	transforming growth factor, beta receptor II (70/80kDa)
hsa-miR-1827	1	0	1	1	1	1	FNBP1L	formin binding protein 1-like
hsa-miR-1827	0	0	1	1	1	1	MBP	myelin basic protein
hsa-miR-1827	0	0	1	1	0	0	KPRP	keratinocyte proline-rich protein
hsa-miR-1827	1	0	1	1	1	1	RGS7BP	regulator of G-protein signaling 7 binding protein
hsa-miR-1827	0	0	1	1	0	0	AHDC1	AT hook, DNA binding motif, containing 1
hsa-miR-1827	1	0	1	0	1	1	C2orf71	chromosome 2 open reading frame 71
hsa-miR-1827	1	0	1	1	0	0	MANEAL	mannosidase, endo-alpha-like
hsa-miR-1827	0	0	1	1	1	1	LYPD5	LY6/PLAUR domain containing 5
hsa-miR-1827	1	0	1	1	1	1	MAF	v-maf musculoaponeurotic fibrosarcoma oncogene homolog (avian)
hsa-miR-1827	0	0	1	1	0	0	ACCSL	1-aminocyclopropane-1-carboxylate synthase homolog (Arabidopsis)(non-functional)-like
hsa-miR-1827	1	0	1	1	1	1	RCE1	RCE1 homolog, prenyl protein protease (S. cerevisiae)
hsa-miR-1827	0	0	1	1	1	1	SLC35A2	solute carrier family 35 (UDP-galactose transporter), member A2
hsa-miR-1827	1	0	1	1	1	1	PPM1B	protein phosphatase, Mg2+/Mn2+ dependent, 1B
hsa-miR-1827	0	0	1	1	1	1	KCNIP1	Kv channel interacting protein 1
hsa-miR-1827	0	0	1	0	0	0	FER1L6	fer-1-like 6 (C. elegans)
hsa-miR-1827	0	0	1	1	1	1	ATAD3C	ATPase family, AAA domain containing 3C
hsa-miR-1827	0	0	1	0	0	0	CEACAM16	carcinoembryonic antigen-related cell adhesion molecule 16
hsa-miR-1827	0	0	1	1	1	1	SIRPG	signal-regulatory protein gamma
hsa-miR-1827	1	0	1	1	1	1	KREMEN1	kringle containing transmembrane protein 1
hsa-miR-1827	1	0	1	0	1	1	CCNL2	cyclin L2
hsa-miR-1827	1	0	1	0	1	1	USP9X	ubiquitin specific peptidase 9, X-linked
hsa-miR-1827	1	0	1	1	1	1	CBLN3	cerebellin 3 precursor
hsa-miR-1827	0	0	1	1	1	1	MDH1B	malate dehydrogenase 1B, NAD (soluble)
hsa-miR-1827	0	0	1	0	1	1	SCN3B	sodium channel, voltage-gated, type III, beta subunit
hsa-miR-1827	1	0	1	1	1	1	HEY1	hairy/enhancer-of-split related with YRPW motif 1
hsa-miR-1827	0	0	1	1	0	0	FAM110A	family with sequence similarity 110, member A
hsa-miR-1827	1	0	1	1	1	1	PABPC1L2B	poly(A) binding protein, cytoplasmic 1-like 2B
hsa-miR-1827	1	0	1	1	1	1	ERBB4	v-erb-a erythroblastic leukemia viral oncogene homolog 4 (avian)
hsa-miR-1827	1	0	1	0	1	1	SLC7A6	solute carrier family 7 (amino acid transporter light chain, y+L system), member 6
hsa-miR-1827	1	0	1	1	1	1	ZNF436	zinc finger protein 436
hsa-miR-1827	1	0	1	1	1	1	PDE11A	phosphodiesterase 11A
hsa-miR-1827	1	0	1	1	1	1	PRR3	proline rich 3
hsa-miR-1827	1	0	1	0	0	0	FAM127B	family with sequence similarity 127, member B
hsa-miR-1827	1	0	1	0	1	1	FAM127C	family with sequence similarity 127, member C
hsa-miR-1827	1	0	1	1	1	1	HAP1	huntingtin-associated protein 1
hsa-miR-1827	1	0	1	0	1	1	FBXO41	F-box protein 41
hsa-miR-1827	1	0	1	0	1	1	THSD7B	thrombospondin, type I, domain containing 7B
hsa-miR-1827	1	0	1	0	1	1	MEGF9	multiple EGF-like-domains 9
hsa-miR-1827	1	0	1	0	0	0	CCDC159	coiled-coil domain containing 159
hsa-miR-1827	0	0	1	1	0	0	NEURL3	neuralized homolog 3 (Drosophila) pseudogene
hsa-miR-1827	1	0	1	1	1	1	MYO1C	myosin IC
hsa-miR-1827	1	0	1	1	1	1	REPS2	RALBP1 associated Eps domain containing 2
hsa-miR-1827	0	0	1	1	0	0	JMJD6	jumonji domain containing 6
hsa-miR-1827	1	0	1	1	1	1	NXF1	nuclear RNA export factor 1
hsa-miR-1827	1	0	1	1	1	1	ASIC1	acid-sensing (proton-gated) ion channel 1
hsa-miR-1827	1	0	1	1	1	1	ADCY9	adenylate cyclase 9
hsa-miR-1827	0	0	1	1	0	0	ARG2	arginase, type II
hsa-miR-1827	1	0	1	0	1	1	BMPR2	bone morphogenetic protein receptor, type II (serine/threonine kinase)
hsa-miR-1827	0	0	1	1	1	1	BUB1B	budding uninhibited by benzimidazoles 1 homolog beta (yeast)
hsa-miR-1827	0	0	1	1	1	1	ENTPD3	ectonucleoside triphosphate diphosphohydrolase 3
hsa-miR-1827	1	0	1	0	1	1	CDK6	cyclin-dependent kinase 6
hsa-miR-1827	0	0	1	1	1	1	CCR1	chemokine (C-C motif) receptor 1
hsa-miR-1827	0	0	1	1	1	1	DARS	aspartyl-tRNA synthetase
hsa-miR-1827	1	0	1	1	1	1	CELSR3	cadherin, EGF LAG seven-pass G-type receptor 3 (flamingo homolog, Drosophila)
hsa-miR-1827	1	0	1	1	1	1	CELSR2	cadherin, EGF LAG seven-pass G-type receptor 2 (flamingo homolog, Drosophila)
hsa-miR-1827	1	0	1	1	1	1	NDST1	N-deacetylase/N-sulfotransferase (heparan glucosaminyl) 1
hsa-miR-1827	0	0	1	1	1	1	CXCL10	chemokine (C-X-C motif) ligand 10
hsa-miR-1827	1	0	1	1	1	1	IRAK2	interleukin-1 receptor-associated kinase 2
hsa-miR-1827	0	0	1	1	0	0	ACRV1	acrosomal vesicle protein 1
hsa-miR-1827	1	0	1	1	1	1	AHNAK	AHNAK nucleoprotein
hsa-miR-1827	1	0	1	1	1	1	ARF3	ADP-ribosylation factor 3
hsa-miR-1827	1	0	1	0	1	1	ARNT	aryl hydrocarbon receptor nuclear translocator
hsa-miR-1827	1	0	1	1	1	1	ATP6V1A	ATPase, H+ transporting, lysosomal 70kDa, V1 subunit A
hsa-miR-1827	0	0	1	1	1	1	BTN1A1	butyrophilin, subfamily 1, member A1
hsa-miR-1827	1	0	1	1	1	1	CDC25A	cell division cycle 25 homolog A (S. pombe)
hsa-miR-1827	1	0	1	1	1	1	CDK2	cyclin-dependent kinase 2
hsa-miR-1827	0	0	1	1	1	1	CEACAM8	carcinoembryonic antigen-related cell adhesion molecule 8
hsa-miR-1827	1	0	1	1	1	1	CNN3	calponin 3, acidic
hsa-miR-1827	0	0	1	1	0	0	DDB1	damage-specific DNA binding protein 1, 127kDa
hsa-miR-1827	1	0	1	1	1	1	E2F3	E2F transcription factor 3
hsa-miR-1827	0	0	1	1	0	0	EFNA5	ephrin-A5
hsa-miR-1827	1	0	1	1	1	1	EPB49	erythrocyte membrane protein band 4.9 (dematin)
hsa-miR-1827	0	0	1	0	1	1	STX2	syntaxin 2
hsa-miR-1827	1	0	1	1	1	1	GLRA2	glycine receptor, alpha 2
hsa-miR-1827	1	0	1	0	1	1	GNAI1	guanine nucleotide binding protein (G protein), alpha inhibiting activity polypeptide 1
hsa-miR-1827	1	0	1	1	1	1	GRB2	growth factor receptor-bound protein 2
hsa-miR-1827	0	0	1	1	1	1	HOXB5	homeobox B5
hsa-miR-1827	1	0	1	1	0	0	IHH	Indian hedgehog
hsa-miR-1827	1	0	1	1	1	1	INSM1	insulinoma-associated 1
hsa-miR-1827	1	0	1	1	1	1	ITGB8	integrin, beta 8
hsa-miR-1827	1	0	1	1	1	1	ITPR2	inositol 1,4,5-trisphosphate receptor, type 2
hsa-miR-1827	1	0	1	0	1	1	KIF3C	kinesin family member 3C
hsa-miR-1827	1	0	1	1	1	1	KPNA3	karyopherin alpha 3 (importin alpha 4)
hsa-miR-1827	0	0	1	1	0	0	KRT4	keratin 4
hsa-miR-1827	0	0	1	1	0	0	KRT33B	keratin 33B
hsa-miR-1827	0	0	1	1	0	0	KRT86	keratin 86
hsa-miR-1827	0	0	1	1	0	0	LGALS1	lectin, galactoside-binding, soluble, 1
hsa-miR-1827	1	0	1	1	1	1	LRP6	low density lipoprotein receptor-related protein 6
hsa-miR-1827	1	0	1	1	1	1	MAP1A	microtubule-associated protein 1A
hsa-miR-1827	0	0	1	0	1	1	MFNG	MFNG O-fucosylpeptide 3-beta-N-acetylglucosaminyltransferase
hsa-miR-1827	0	0	1	0	1	1	CXCL9	chemokine (C-X-C motif) ligand 9
hsa-miR-1827	1	0	1	1	1	1	MSN	moesin
hsa-miR-1827	0	0	1	0	0	0	MYH6	myosin, heavy chain 6, cardiac muscle, alpha
hsa-miR-1827	0	0	1	1	0	0	MYOG	myogenin (myogenic factor 4)
hsa-miR-1827	0	0	1	1	1	1	NID1	nidogen 1
hsa-miR-1827	0	0	1	0	1	1	OAZ2	ornithine decarboxylase antizyme 2
hsa-miR-1827	1	0	1	1	1	1	OSBP	oxysterol binding protein
hsa-miR-1827	0	0	1	1	1	1	PBX1	pre-B-cell leukemia homeobox 1
hsa-miR-1827	0	0	1	1	1	1	PDE7A	phosphodiesterase 7A
hsa-miR-1827	1	0	1	1	0	0	PDGFB	platelet-derived growth factor beta polypeptide
hsa-miR-1827	0	0	1	1	0	0	PER1	period homolog 1 (Drosophila)
hsa-miR-1827	1	0	1	1	1	1	PHF1	PHD finger protein 1
hsa-miR-1827	0	0	1	1	0	0	PI3	peptidase inhibitor 3, skin-derived
hsa-miR-1827	0	0	1	1	1	1	PIK3C2B	phosphatidylinositol-4-phosphate 3-kinase, catalytic subunit type 2 beta
hsa-miR-1827	0	0	1	1	1	1	PIM1	pim-1 oncogene
hsa-miR-1827	1	0	1	1	1	1	PLAGL2	pleiomorphic adenoma gene-like 2
hsa-miR-1827	1	0	1	1	1	1	PLCG1	phospholipase C, gamma 1
hsa-miR-1827	0	0	1	1	1	1	POLR2G	polymerase (RNA) II (DNA directed) polypeptide G
hsa-miR-1827	1	0	1	1	1	1	PPP6C	protein phosphatase 6, catalytic subunit
hsa-miR-1827	1	0	1	0	1	1	MAPK4	mitogen-activated protein kinase 4
hsa-miR-1827	0	0	1	1	1	1	MAP2K6	mitogen-activated protein kinase kinase 6
hsa-miR-1827	0	0	1	1	1	1	PTPN12	protein tyrosine phosphatase, non-receptor type 12
hsa-miR-1827	1	0	1	1	1	1	RAD23B	RAD23 homolog B (S. cerevisiae)
hsa-miR-1827	1	0	1	0	1	1	RAP2B	RAP2B, member of RAS oncogene family
hsa-miR-1827	1	0	1	1	1	1	RGS16	regulator of G-protein signaling 16
hsa-miR-1827	0	0	1	1	1	1	RING1	ring finger protein 1
hsa-miR-1827	1	0	1	0	1	1	SORT1	sortilin 1
hsa-miR-1827	1	0	1	0	1	1	CCL22	chemokine (C-C motif) ligand 22
hsa-miR-1827	1	0	1	1	1	1	SH3GL2	SH3-domain GRB2-like 2
hsa-miR-1827	1	0	1	1	1	1	SLC7A1	solute carrier family 7 (cationic amino acid transporter, y+ system), member 1
hsa-miR-1827	1	0	1	1	1	1	SMARCD1	SWI/SNF related, matrix associated, actin dependent regulator of chromatin, subfamily d, member 1
hsa-miR-1827	1	0	1	1	1	1	SMARCD2	SWI/SNF related, matrix associated, actin dependent regulator of chromatin, subfamily d, member 2
hsa-miR-1827	1	0	1	1	1	1	SRF	serum response factor (c-fos serum response element-binding transcription factor)
hsa-miR-1827	0	0	1	0	1	1	TRIM21	tripartite motif containing 21
hsa-miR-1827	1	0	1	1	1	1	SSR2	signal sequence receptor, beta (translocon-associated protein beta)
hsa-miR-1827	1	0	1	1	1	1	STAC	SH3 and cysteine rich domain
hsa-miR-1827	1	0	1	0	1	1	STC1	stanniocalcin 1
hsa-miR-1827	0	0	1	1	1	1	STIM1	stromal interaction molecule 1
hsa-miR-1827	0	0	1	0	1	1	STXBP1	syntaxin binding protein 1
hsa-miR-1827	0	0	1	1	1	1	SUPT6H	suppressor of Ty 6 homolog (S. cerevisiae)
hsa-miR-1827	1	0	1	1	1	1	SUV39H1	suppressor of variegation 3-9 homolog 1 (Drosophila)
hsa-miR-1827	1	0	1	0	1	1	TAL1	T-cell acute lymphocytic leukemia 1
hsa-miR-1827	1	0	1	0	1	1	THBS1	thrombospondin 1
hsa-miR-1827	1	0	1	1	1	1	NR2E1	nuclear receptor subfamily 2, group E, member 1
hsa-miR-1827	1	0	1	0	1	1	UBE2L3	ubiquitin-conjugating enzyme E2L 3
hsa-miR-1827	1	0	1	0	1	1	VCL	vinculin
hsa-miR-1827	1	0	1	0	1	1	ZIC1	Zic family member 1
hsa-miR-1827	1	0	1	0	1	1	BSN	bassoon (presynaptic cytomatrix protein)
hsa-miR-1827	1	0	1	1	1	1	FZD5	frizzled family receptor 5
hsa-miR-1827	1	0	1	1	1	1	CUL5	cullin 5
hsa-miR-1827	0	0	1	1	1	1	USP5	ubiquitin specific peptidase 5 (isopeptidase T)
hsa-miR-1827	1	0	1	1	1	1	NRIP1	nuclear receptor interacting protein 1
hsa-miR-1827	1	0	1	0	1	1	CNTNAP1	contactin associated protein 1
hsa-miR-1827	0	0	1	1	1	1	ITGA10	integrin, alpha 10
hsa-miR-1827	0	0	1	1	1	1	CHST1	carbohydrate (keratan sulfate Gal-6) sulfotransferase 1
hsa-miR-1827	1	0	1	1	1	1	BHLHE40	basic helix-loop-helix family, member e40
hsa-miR-1827	1	0	1	1	0	0	KHSRP	KH-type splicing regulatory protein
hsa-miR-1827	0	0	1	1	1	1	FAM193A	family with sequence similarity 193, member A
hsa-miR-1827	1	0	1	0	1	1	TNKS	tankyrase, TRF1-interacting ankyrin-related ADP-ribose polymerase
hsa-miR-1827	1	0	1	1	1	1	ALDH1A2	aldehyde dehydrogenase 1 family, member A2
hsa-miR-1827	0	0	1	1	1	1	RNF8	ring finger protein 8, E3 ubiquitin protein ligase
hsa-miR-1827	1	0	1	1	1	1	UBE2M	ubiquitin-conjugating enzyme E2M
hsa-miR-1827	1	0	1	1	1	1	BCL2L2	BCL2-like 2
hsa-miR-1827	0	0	1	1	0	0	AP2S1	adaptor-related protein complex 2, sigma 1 subunit
hsa-miR-1827	1	0	1	1	1	1	EFNB2	ephrin-B2
hsa-miR-1827	0	0	1	1	1	1	FLT3	fms-related tyrosine kinase 3
hsa-miR-1827	0	0	1	1	0	0	GIP	gastric inhibitory polypeptide
hsa-miR-1827	0	0	1	1	1	1	LBP	lipopolysaccharide binding protein
hsa-miR-1827	1	0	1	1	1	1	RAB5A	RAB5A, member RAS oncogene family
hsa-miR-1827	1	0	1	1	1	1	SEMA3F	sema domain, immunoglobulin domain (Ig), short basic domain, secreted, (semaphorin) 3F
hsa-miR-1827	0	0	1	1	0	0	SLC6A5	solute carrier family 6 (neurotransmitter transporter, glycine), member 5
hsa-miR-1827	1	0	1	0	1	1	MED14	mediator complex subunit 14
hsa-miR-1827	1	0	1	1	1	1	MED21	mediator complex subunit 21
hsa-miR-1827	1	0	1	1	1	1	ARL3	ADP-ribosylation factor-like 3
hsa-miR-1827	0	0	1	1	1	1	ASCL1	achaete-scute complex homolog 1 (Drosophila)
hsa-miR-1827	1	0	1	0	1	1	CEBPA	CCAAT/enhancer binding protein (C/EBP), alpha
hsa-miR-1827	0	0	1	1	1	1	COL12A1	collagen, type XII, alpha 1
hsa-miR-1827	1	0	1	1	1	1	CREB1	cAMP responsive element binding protein 1
hsa-miR-1827	1	0	1	1	1	1	DAG1	dystroglycan 1 (dystrophin-associated glycoprotein 1)
hsa-miR-1827	1	0	1	1	1	1	DUSP5	dual specificity phosphatase 5
hsa-miR-1827	1	0	1	1	1	1	EFNB1	ephrin-B1
hsa-miR-1827	1	0	1	1	1	1	EPHB2	EPH receptor B2
hsa-miR-1827	1	0	1	0	1	1	ACSL4	acyl-CoA synthetase long-chain family member 4
hsa-miR-1827	1	0	1	1	1	1	FGD1	FYVE, RhoGEF and PH domain containing 1
hsa-miR-1827	1	0	1	1	1	1	FLOT2	flotillin 2
hsa-miR-1827	1	0	1	1	1	1	MLLT3	myeloid/lymphoid or mixed-lineage leukemia (trithorax homolog, Drosophila); translocated to, 3
hsa-miR-1827	1	0	1	0	1	1	SCN2B	sodium channel, voltage-gated, type II, beta subunit
hsa-miR-1827	1	0	1	0	1	1	USP9Y	ubiquitin specific peptidase 9, Y-linked
hsa-miR-1827	1	0	1	1	1	1	BAP1	BRCA1 associated protein-1 (ubiquitin carboxy-terminal hydrolase)
hsa-miR-1827	0	0	1	1	1	1	SDPR	serum deprivation response
hsa-miR-1827	1	0	1	1	1	1	SYNGR1	synaptogyrin 1
hsa-miR-1827	1	0	1	1	0	0	COX7A2L	cytochrome c oxidase subunit VIIa polypeptide 2 like
hsa-miR-1827	1	0	1	1	1	1	LARGE	like-glycosyltransferase
hsa-miR-1827	1	0	1	1	1	1	KIF3B	kinesin family member 3B
hsa-miR-1827	1	0	1	1	1	1	ONECUT2	one cut homeobox 2
hsa-miR-1827	0	0	1	1	1	1	MRPL33	mitochondrial ribosomal protein L33
hsa-miR-1827	1	0	1	0	1	1	SEC22B	SEC22 vesicle trafficking protein homolog B (S. cerevisiae) (gene/pseudogene)
hsa-miR-1827	0	0	1	1	1	1	CALB1	calbindin 1, 28kDa
hsa-miR-1827	0	0	1	1	0	0	DDX1	DEAD (Asp-Glu-Ala-Asp) box helicase 1
hsa-miR-1827	0	0	1	1	0	0	NR5A1	nuclear receptor subfamily 5, group A, member 1
hsa-miR-1827	0	0	1	1	0	0	RAPSN	receptor-associated protein of the synapse
hsa-miR-1827	1	0	1	1	0	0	ZMYM3	zinc finger, MYM-type 3
hsa-miR-1827	1	0	1	0	1	1	NUP153	nucleoporin 153kDa
hsa-miR-1827	0	0	1	1	1	1	SART1	squamous cell carcinoma antigen recognized by T cells
hsa-miR-1827	0	0	1	1	1	1	CA3	carbonic anhydrase III, muscle specific
hsa-miR-1827	1	0	1	0	1	1	E2F1	E2F transcription factor 1
hsa-miR-1827	0	0	1	0	1	1	EPHA3	EPH receptor A3
hsa-miR-1827	1	0	1	1	1	1	ETS1	v-ets erythroblastosis virus E26 oncogene homolog 1 (avian)
hsa-miR-1827	0	0	1	0	1	1	FOSL2	FOS-like antigen 2
hsa-miR-1827	0	0	1	1	1	1	GRK5	G protein-coupled receptor kinase 5
hsa-miR-1827	1	0	1	1	1	1	MYCL1	v-myc myelocytomatosis viral oncogene homolog 1, lung carcinoma derived (avian)
hsa-miR-1827	1	0	1	1	0	0	NNAT	neuronatin
hsa-miR-1827	1	0	1	1	1	1	PHF2	PHD finger protein 2
hsa-miR-1827	1	0	1	0	1	1	PRKAB2	protein kinase, AMP-activated, beta 2 non-catalytic subunit
hsa-miR-1827	1	0	1	1	1	1	RALA	v-ral simian leukemia viral oncogene homolog A (ras related)
hsa-miR-1827	1	0	1	1	0	0	SALL2	sal-like 2 (Drosophila)
hsa-miR-1827	0	0	1	1	1	1	TIE1	tyrosine kinase with immunoglobulin-like and EGF-like domains 1
hsa-miR-1827	1	0	1	1	1	1	WNT1	wingless-type MMTV integration site family, member 1
hsa-miR-1827	0	0	1	1	0	0	ARHGEF5	Rho guanine nucleotide exchange factor (GEF) 5
hsa-miR-1827	1	0	1	0	1	1	CCDC6	coiled-coil domain containing 6
hsa-miR-1827	1	0	1	1	1	1	GABBR2	gamma-aminobutyric acid (GABA) B receptor, 2
hsa-miR-1827	0	0	1	1	1	1	GNPDA1	glucosamine-6-phosphate deaminase 1
hsa-miR-1827	0	0	1	1	1	1	BCAM	basal cell adhesion molecule (Lutheran blood group)
hsa-miR-1827	0	0	1	0	1	1	POU3F2	POU class 3 homeobox 2
hsa-miR-1827	1	0	1	1	1	1	RGS4	regulator of G-protein signaling 4
hsa-miR-1827	1	0	1	1	1	1	TERF2	telomeric repeat binding factor 2
hsa-miR-1827	0	0	1	1	1	1	GPR52	G protein-coupled receptor 52
hsa-miR-1827	1	0	1	0	1	1	GPC6	glypican 6
hsa-miR-1827	1	0	1	1	1	1	UST	uronyl-2-sulfotransferase
hsa-miR-1827	1	0	1	1	1	1	ARPC5	actin related protein 2/3 complex, subunit 5, 16kDa
hsa-miR-1827	1	0	1	1	1	1	ACTR1A	ARP1 actin-related protein 1 homolog A, centractin alpha (yeast)
hsa-miR-1827	0	0	1	1	0	0	EBI3	Epstein-Barr virus induced 3
hsa-miR-1827	0	0	1	1	0	0	LPCAT3	lysophosphatidylcholine acyltransferase 3
hsa-miR-1827	0	0	1	1	1	1	TXNDC9	thioredoxin domain containing 9
hsa-miR-1827	0	0	1	1	1	1	NUTF2	nuclear transport factor 2
hsa-miR-1827	1	0	1	0	1	1	DCAF7	DDB1 and CUL4 associated factor 7
hsa-miR-1827	1	0	1	0	1	1	SPRY3	sprouty homolog 3 (Drosophila)
hsa-miR-1827	0	0	1	1	1	1	FSTL3	follistatin-like 3 (secreted glycoprotein)
hsa-miR-1827	1	0	1	1	1	1	EFS	embryonal Fyn-associated substrate
hsa-miR-1827	0	0	1	1	1	1	DSCR4	Down syndrome critical region gene 4
hsa-miR-1827	1	0	1	1	1	1	MMP16	matrix metallopeptidase 16 (membrane-inserted)
hsa-miR-1827	1	0	1	1	0	0	NAB2	NGFI-A binding protein 2 (EGR1 binding protein 2)
hsa-miR-1827	0	0	1	0	1	1	HCAR3	hydroxycarboxylic acid receptor 3
hsa-miR-1827	0	0	1	1	1	1	LANCL1	LanC lantibiotic synthetase component C-like 1 (bacterial)
hsa-miR-1827	1	0	1	1	1	1	DAGLA	diacylglycerol lipase, alpha
hsa-miR-1827	1	0	1	1	1	1	LASP1	LIM and SH3 protein 1
hsa-miR-1827	1	0	1	1	1	1	NEFL	neurofilament, light polypeptide
hsa-miR-1827	0	0	1	0	1	1	OAS3	2'-5'-oligoadenylate synthetase 3, 100kDa
hsa-miR-1827	0	0	1	1	1	1	PA2G4	proliferation-associated 2G4, 38kDa
hsa-miR-1827	0	0	1	1	0	0	PAX1	paired box 1
hsa-miR-1827	1	0	1	1	1	1	CDK16	cyclin-dependent kinase 16
hsa-miR-1827	1	0	1	1	1	1	POU4F1	POU class 4 homeobox 1
hsa-miR-1827	1	0	1	0	1	1	PRKAA2	protein kinase, AMP-activated, alpha 2 catalytic subunit
hsa-miR-1827	0	0	1	1	1	1	TYRO3	TYRO3 protein tyrosine kinase
hsa-miR-1827	1	0	1	1	1	1	NPEPPS	aminopeptidase puromycin sensitive
hsa-miR-1827	1	0	1	1	1	1	FBLN5	fibulin 5
hsa-miR-1827	1	0	1	1	1	1	ZER1	zer-1 homolog (C. elegans)
hsa-miR-1827	1	0	1	1	1	1	SEC23A	Sec23 homolog A (S. cerevisiae)
hsa-miR-1827	1	0	1	1	1	1	VAT1	vesicle amine transport protein 1 homolog (T. californica)
hsa-miR-1827	1	0	1	1	0	0	PRPF8	PRP8 pre-mRNA processing factor 8 homolog (S. cerevisiae)
hsa-miR-1827	1	0	1	1	1	1	HEXIM1	hexamethylene bis-acetamide inducible 1
hsa-miR-1827	0	0	1	1	0	0	ALX3	ALX homeobox 3
hsa-miR-1827	0	0	1	0	0	0	RELB	v-rel reticuloendotheliosis viral oncogene homolog B
hsa-miR-1827	0	0	1	0	1	1	SLC16A2	solute carrier family 16, member 2 (thyroid hormone transporter)
hsa-miR-1827	1	0	1	1	1	1	DYNLT3	dynein, light chain, Tctex-type 3
hsa-miR-1827	1	0	1	0	1	1	IGF2BP1	insulin-like growth factor 2 mRNA binding protein 1
hsa-miR-1827	1	0	1	1	1	1	CORIN	corin, serine peptidase
hsa-miR-1827	0	0	1	1	1	1	POLD3	polymerase (DNA-directed), delta 3, accessory subunit
hsa-miR-1827	1	0	1	0	1	1	API5	apoptosis inhibitor 5
hsa-miR-1827	0	0	1	1	0	0	KIF1C	kinesin family member 1C
hsa-miR-1827	1	0	1	1	1	1	SRSF10	serine/arginine-rich splicing factor 10
hsa-miR-1827	1	0	1	1	1	1	DIAPH2	diaphanous homolog 2 (Drosophila)
hsa-miR-1827	1	0	1	1	0	0	PSKH1	protein serine kinase H1
hsa-miR-1827	1	0	1	1	1	1	LAPTM5	lysosomal protein transmembrane 5
hsa-miR-1827	1	0	1	1	1	1	BTG2	BTG family, member 2
hsa-miR-1827	1	0	1	0	1	1	SYNGAP1	synaptic Ras GTPase activating protein 1
hsa-miR-1827	1	0	1	1	0	0	PDIA5	protein disulfide isomerase family A, member 5
hsa-miR-1827	0	0	1	1	1	1	TMED2	transmembrane emp24 domain trafficking protein 2
hsa-miR-1827	0	0	1	1	0	0	STIP1	stress-induced-phosphoprotein 1
hsa-miR-1827	1	0	1	1	1	1	GLIPR1	GLI pathogenesis-related 1
hsa-miR-1827	0	0	1	1	0	0	PIM2	pim-2 oncogene
hsa-miR-1827	1	0	1	1	1	1	RIT1	Ras-like without CAAX 1
hsa-miR-1827	1	0	1	1	1	1	RP2	retinitis pigmentosa 2 (X-linked recessive)
hsa-miR-1827	1	0	1	0	1	1	SOX12	SRY (sex determining region Y)-box 12
hsa-miR-1827	1	0	1	1	1	1	SYN1	synapsin I
hsa-miR-1827	1	0	1	1	1	1	CLDN10	claudin 10
hsa-miR-1827	0	0	1	1	1	1	RER1	RER1 retention in endoplasmic reticulum 1 homolog (S. cerevisiae)
hsa-miR-1827	1	0	1	0	1	1	BTN3A2	butyrophilin, subfamily 3, member A2
hsa-miR-1827	0	0	1	1	1	1	FAF1	Fas (TNFRSF6) associated factor 1
hsa-miR-1827	0	0	1	1	0	0	TCEB2	transcription elongation factor B (SIII), polypeptide 2 (18kDa, elongin B)
hsa-miR-1827	1	0	1	1	1	1	TMF1	TATA element modulatory factor 1
hsa-miR-1827	1	0	1	1	1	1	UTY	ubiquitously transcribed tetratricopeptide repeat gene, Y-linked
hsa-miR-1827	1	0	1	1	1	1	TESK2	testis-specific kinase 2
hsa-miR-1827	1	0	1	1	1	1	ERLIN2	ER lipid raft associated 2
hsa-miR-1827	1	0	1	1	1	1	C14orf1	chromosome 14 open reading frame 1
hsa-miR-1827	1	0	1	1	1	1	PALM2-AKAP2	PALM2-AKAP2 readthrough
hsa-miR-1827	1	0	1	1	1	1	CASC3	cancer susceptibility candidate 3
hsa-miR-1827	0	0	1	1	1	1	KLRK1	killer cell lectin-like receptor subfamily K, member 1
hsa-miR-1827	0	0	1	1	0	0	LTB	lymphotoxin beta (TNF superfamily, member 3)
hsa-miR-1827	0	0	1	1	0	0	AKR7A3	aldo-keto reductase family 7, member A3 (aflatoxin aldehyde reductase)
hsa-miR-1827	1	0	1	1	1	1	APPL1	adaptor protein, phosphotyrosine interaction, PH domain and leucine zipper containing 1
hsa-miR-1827	0	0	1	1	0	0	FBXO2	F-box protein 2
hsa-miR-1827	0	0	1	1	1	1	HARS2	histidyl-tRNA synthetase 2, mitochondrial
hsa-miR-1827	0	0	1	1	1	1	RAB3GAP1	RAB3 GTPase activating protein subunit 1 (catalytic)
hsa-miR-1827	1	0	1	1	1	1	RHOQ	ras homolog family member Q
hsa-miR-1827	0	0	1	1	1	1	RRAS2	related RAS viral (r-ras) oncogene homolog 2
hsa-miR-1827	1	0	1	1	1	1	HS2ST1	heparan sulfate 2-O-sulfotransferase 1
hsa-miR-1827	1	0	1	1	1	1	KCND2	potassium voltage-gated channel, Shal-related subfamily, member 2
hsa-miR-1827	1	0	1	1	1	1	KCNE1L	KCNE1-like
hsa-miR-1827	1	0	1	0	1	1	RAPGEF5	Rap guanine nucleotide exchange factor (GEF) 5
hsa-miR-1827	1	0	1	1	1	1	MMD	monocyte to macrophage differentiation-associated
hsa-miR-1827	1	0	1	1	1	1	SLC17A5	solute carrier family 17 (anion/sugar transporter), member 5
hsa-miR-1827	1	0	1	1	1	1	STAT5B	signal transducer and activator of transcription 5B
hsa-miR-1827	0	0	1	1	1	1	CD24	CD24 molecule
hsa-miR-1827	1	0	1	1	1	1	STK39	serine threonine kinase 39
hsa-miR-1827	0	0	1	1	1	1	N6AMT1	N-6 adenine-specific DNA methyltransferase 1 (putative)
hsa-miR-1827	1	0	1	1	1	1	SERTAD3	SERTA domain containing 3
hsa-miR-1827	0	0	1	0	1	1	EMR2	egf-like module containing, mucin-like, hormone receptor-like 2
hsa-miR-1827	1	0	1	1	1	1	NRG1	neuregulin 1
hsa-miR-1827	1	0	1	1	0	0	DEXI	Dexi homolog (mouse)
hsa-miR-1827	1	0	1	1	1	1	KLF15	Kruppel-like factor 15
hsa-miR-1827	0	0	1	1	0	0	HSD17B8	hydroxysteroid (17-beta) dehydrogenase 8
hsa-miR-1827	0	0	1	1	1	1	UBL4A	ubiquitin-like 4A
hsa-miR-1827	1	0	1	0	1	1	ODZ1	odz, odd Oz/ten-m homolog 1 (Drosophila)
hsa-miR-1827	1	0	1	1	1	1	MAPRE2	microtubule-associated protein, RP/EB family, member 2
hsa-miR-1827	0	0	1	1	1	1	CAPN6	calpain 6
hsa-miR-1827	1	0	1	1	1	1	TDRD7	tudor domain containing 7
hsa-miR-1827	0	0	1	1	1	1	OPTC	opticin
hsa-miR-1827	1	0	1	1	0	0	SND1	staphylococcal nuclease and tudor domain containing 1
hsa-miR-1827	1	0	1	1	1	1	SERP1	stress-associated endoplasmic reticulum protein 1
hsa-miR-1827	0	0	1	1	0	0	GPR162	G protein-coupled receptor 162
hsa-miR-1827	0	0	1	1	0	0	SIT1	signaling threshold regulating transmembrane adaptor 1
hsa-miR-1827	0	0	1	1	0	0	APOBEC3C	apolipoprotein B mRNA editing enzyme, catalytic polypeptide-like 3C
hsa-miR-1827	1	0	1	1	1	1	GRHL1	grainyhead-like 1 (Drosophila)
hsa-miR-1827	1	0	1	1	1	1	EHD3	EH-domain containing 3
hsa-miR-1827	1	0	1	1	1	1	FAF2	Fas associated factor family member 2
hsa-miR-1827	1	0	1	1	1	1	ZNF592	zinc finger protein 592
hsa-miR-1827	1	0	1	1	1	1	RALGPS1	Ral GEF with PH domain and SH3 binding motif 1
hsa-miR-1827	1	0	1	0	1	1	RAB11FIP3	RAB11 family interacting protein 3 (class II)
hsa-miR-1827	0	0	1	1	0	0	SETD1A	SET domain containing 1A
hsa-miR-1827	1	0	1	1	1	1	TBKBP1	TBK1 binding protein 1
hsa-miR-1827	1	0	1	1	1	1	MLL4	myeloid/lymphoid or mixed-lineage leukemia 4
hsa-miR-1827	0	0	1	1	0	0	PCNXL2	pecanex-like 2 (Drosophila)
hsa-miR-1827	1	0	1	1	1	1	ZBTB39	zinc finger and BTB domain containing 39
hsa-miR-1827	1	0	1	1	1	1	NUAK1	NUAK family, SNF1-like kinase, 1
hsa-miR-1827	0	0	1	1	1	1	KIAA0196	KIAA0196
hsa-miR-1827	1	0	1	1	1	1	SV2A	synaptic vesicle glycoprotein 2A
hsa-miR-1827	1	0	1	0	1	1	ZBTB40	zinc finger and BTB domain containing 40
hsa-miR-1827	1	0	1	1	1	1	JOSD1	Josephin domain containing 1
hsa-miR-1827	1	0	1	0	1	1	RAB11FIP2	RAB11 family interacting protein 2 (class I)
hsa-miR-1827	1	0	1	1	1	1	DIP2C	DIP2 disco-interacting protein 2 homolog C (Drosophila)
hsa-miR-1827	1	0	1	1	1	1	XPO7	exportin 7
hsa-miR-1827	1	0	1	0	1	1	NMNAT2	nicotinamide nucleotide adenylyltransferase 2
hsa-miR-1827	1	0	1	0	1	1	ZNF609	zinc finger protein 609
hsa-miR-1827	1	0	1	0	1	1	GGA2	golgi-associated, gamma adaptin ear containing, ARF binding protein 2
hsa-miR-1827	1	0	1	0	1	1	ERC1	ELKS/RAB6-interacting/CAST family member 1
hsa-miR-1827	1	0	1	0	1	1	PEG10	paternally expressed 10
hsa-miR-1827	1	0	1	1	1	1	RTF1	Rtf1, Paf1/RNA polymerase II complex component, homolog (S. cerevisiae)
hsa-miR-1827	1	0	1	0	1	1	LARP4B	La ribonucleoprotein domain family, member 4B
hsa-miR-1827	1	0	1	1	1	1	PRRC2C	proline-rich coiled-coil 2C
hsa-miR-1827	0	0	1	1	1	1	ARC	activity-regulated cytoskeleton-associated protein
hsa-miR-1827	1	0	1	0	1	1	KIAA1024	KIAA1024
hsa-miR-1827	1	0	1	1	1	1	WDR7	WD repeat domain 7
hsa-miR-1827	1	0	1	1	1	1	PHF15	PHD finger protein 15
hsa-miR-1827	0	0	1	1	1	1	ANGEL1	angel homolog 1 (Drosophila)
hsa-miR-1827	1	0	1	1	0	0	SMG5	smg-5 homolog, nonsense mediated mRNA decay factor (C. elegans)
hsa-miR-1827	1	0	1	1	1	1	ASXL1	additional sex combs like 1 (Drosophila)
hsa-miR-1827	1	0	1	1	1	1	RIMBP2	RIMS binding protein 2
hsa-miR-1827	1	0	1	1	1	1	MYRIP	myosin VIIA and Rab interacting protein
hsa-miR-1827	0	0	1	1	0	0	TSKU	tsukushi small leucine rich proteoglycan homolog (Xenopus laevis)
hsa-miR-1827	1	0	1	0	1	1	PPP1R16B	protein phosphatase 1, regulatory subunit 16B
hsa-miR-1827	1	0	1	0	1	1	ERC2	ELKS/RAB6-interacting/CAST family member 2
hsa-miR-1827	1	0	1	1	0	0	LDLRAP1	low density lipoprotein receptor adaptor protein 1
hsa-miR-1827	0	0	1	1	1	1	TRPC4AP	transient receptor potential cation channel, subfamily C, member 4 associated protein
hsa-miR-1827	0	0	1	1	1	1	TES	testis derived transcript (3 LIM domains)
hsa-miR-1827	1	0	1	1	1	1	PHF19	PHD finger protein 19
hsa-miR-1827	0	0	1	1	1	1	RSL1D1	ribosomal L1 domain containing 1
hsa-miR-1827	1	0	1	1	1	1	FAM155B	family with sequence similarity 155, member B
hsa-miR-1827	0	0	1	1	0	0	DESI1	desumoylating isopeptidase 1
hsa-miR-1827	0	0	1	1	1	1	GLTSCR1	glioma tumor suppressor candidate region gene 1
hsa-miR-1827	1	0	1	1	1	1	WT1-AS	WT1 antisense RNA
hsa-miR-1827	1	0	1	1	1	1	ST8SIA3	ST8 alpha-N-acetyl-neuraminide alpha-2,8-sialyltransferase 3
hsa-miR-1827	1	0	1	1	1	1	UBE2J1	ubiquitin-conjugating enzyme E2, J1
hsa-miR-1827	0	0	1	1	1	1	HDGFRP3	hepatoma-derived growth factor, related protein 3
hsa-miR-1827	1	0	1	0	1	1	CNR1	cannabinoid receptor 1 (brain)
hsa-miR-1827	1	0	1	1	1	1	MPC1	mitochondrial pyruvate carrier 1
hsa-miR-1827	0	0	1	1	0	0	PKD2L1	polycystic kidney disease 2-like 1
hsa-miR-1827	0	0	1	1	1	1	FBXO40	F-box protein 40
hsa-miR-1827	1	0	1	1	1	1	RAB14	RAB14, member RAS oncogene family
hsa-miR-1827	1	0	1	1	0	0	CPA4	carboxypeptidase A4
hsa-miR-1827	1	0	1	0	1	1	RAB8B	RAB8B, member RAS oncogene family
hsa-miR-1827	0	0	1	1	1	1	KDM3B	lysine (K)-specific demethylase 3B
hsa-miR-1827	0	0	1	1	1	1	SLC22A17	solute carrier family 22, member 17
hsa-miR-1827	1	0	1	1	0	0	DUOX1	dual oxidase 1
hsa-miR-1827	0	0	1	1	1	1	POLE3	polymerase (DNA directed), epsilon 3, accessory subunit
hsa-miR-1827	1	0	1	1	1	1	PLXNA3	plexin A3
hsa-miR-1827	1	0	1	0	1	1	UBE2Q1	ubiquitin-conjugating enzyme E2Q family member 1
hsa-miR-1827	0	0	1	1	0	0	FAM83E	family with sequence similarity 83, member E
hsa-miR-1827	1	0	1	1	1	1	LPPR1	lipid phosphate phosphatase-related protein type 1
hsa-miR-1827	1	0	1	0	1	1	MARCH5	membrane-associated ring finger (C3HC4) 5
hsa-miR-1827	1	0	1	1	1	1	FAM120C	family with sequence similarity 120C
hsa-miR-1827	0	0	1	1	1	1	SCYL2	SCY1-like 2 (S. cerevisiae)
hsa-miR-1827	0	0	1	0	1	1	MREG	melanoregulin
hsa-miR-1827	0	0	1	1	1	1	GPATCH2	G patch domain containing 2
hsa-miR-1827	1	0	1	0	1	1	ARMC1	armadillo repeat containing 1
hsa-miR-1827	0	0	1	1	1	1	NUDT11	nudix (nucleoside diphosphate linked moiety X)-type motif 11
hsa-miR-1827	1	0	1	1	1	1	LRRC1	leucine rich repeat containing 1
hsa-miR-1827	0	0	1	1	0	0	SLC38A7	solute carrier family 38, member 7
hsa-miR-1827	1	0	1	1	1	1	TMEM143	transmembrane protein 143
hsa-miR-1827	0	0	1	1	0	0	PRR11	proline rich 11
hsa-miR-1827	1	0	1	1	1	1	DRAM1	DNA-damage regulated autophagy modulator 1
hsa-miR-1827	1	0	1	0	1	1	FOXJ2	forkhead box J2
hsa-miR-1827	1	0	1	1	1	1	ASH1L	ash1 (absent, small, or homeotic)-like (Drosophila)
hsa-miR-1827	1	0	1	1	1	1	LRRC59	leucine rich repeat containing 59
hsa-miR-1827	1	0	1	1	1	1	CSGALNACT2	chondroitin sulfate N-acetylgalactosaminyltransferase 2
hsa-miR-1827	0	0	1	1	1	1	LENEP	lens epithelial protein
hsa-miR-1827	1	0	1	0	1	1	KLHL9	kelch-like 9 (Drosophila)
hsa-miR-1827	1	0	1	0	1	1	PCDHAC1	protocadherin alpha subfamily C, 1
hsa-miR-1827	1	0	1	0	1	1	PCDHAC2	protocadherin alpha subfamily C, 2
hsa-miR-1827	1	0	1	1	1	1	PCDHA1	protocadherin alpha 1
hsa-miR-1827	1	0	1	0	1	1	PCDHA10	protocadherin alpha 10
hsa-miR-1827	1	0	1	0	1	1	PCDHA11	protocadherin alpha 11
hsa-miR-1827	1	0	1	0	1	1	PCDHA12	protocadherin alpha 12
hsa-miR-1827	1	0	1	1	1	1	PCDHA2	protocadherin alpha 2
hsa-miR-1827	1	0	1	1	1	1	PCDHA3	protocadherin alpha 3
hsa-miR-1827	1	0	1	1	1	1	PCDHA6	protocadherin alpha 6
hsa-miR-1827	1	0	1	0	1	1	PCDHA7	protocadherin alpha 7
hsa-miR-1827	1	0	1	1	1	1	PCDHA8	protocadherin alpha 8
hsa-miR-1827	1	0	1	1	0	0	GPR173	G protein-coupled receptor 173
hsa-miR-1827	1	0	1	1	1	1	SEPT3	septin 3
hsa-miR-1827	1	0	1	0	1	1	UBFD1	ubiquitin family domain containing 1
hsa-miR-1827	1	0	1	1	1	1	LRRC8A	leucine rich repeat containing 8 family, member A
hsa-miR-1827	0	0	1	1	0	0	IRGC	immunity-related GTPase family, cinema
hsa-miR-1827	0	0	1	1	0	0	OPN1LW	opsin 1 (cone pigments), long-wave-sensitive
hsa-miR-1827	0	0	1	1	1	1	UBQLN4	ubiquilin 4
hsa-miR-1827	0	0	1	1	0	0	NDUFA4L2	NADH dehydrogenase (ubiquinone) 1 alpha subcomplex, 4-like 2
hsa-miR-1827	0	0	1	1	1	1	RAD18	RAD18 homolog (S. cerevisiae)
hsa-miR-1827	1	0	1	1	1	1	NMUR2	neuromedin U receptor 2
hsa-miR-1827	0	0	1	1	1	1	STOX2	storkhead box 2
hsa-miR-1827	1	0	1	1	0	0	SLC17A7	solute carrier family 17 (sodium-dependent inorganic phosphate cotransporter), member 7
hsa-miR-1827	0	0	1	1	1	1	PAPPA2	pappalysin 2
hsa-miR-1827	1	0	1	1	0	0	JPH2	junctophilin 2
hsa-miR-1827	1	0	1	1	0	0	THAP11	THAP domain containing 11
hsa-miR-1827	1	0	1	1	1	1	EPHA8	EPH receptor A8
hsa-miR-1827	1	0	1	1	1	1	NRIP3	nuclear receptor interacting protein 3
hsa-miR-1827	1	0	1	1	1	1	JPH1	junctophilin 1
hsa-miR-1827	1	0	1	1	1	1	SLC24A3	solute carrier family 24 (sodium/potassium/calcium exchanger), member 3
hsa-miR-1827	1	0	1	0	1	1	KCNS2	potassium voltage-gated channel, delayed-rectifier, subfamily S, member 2
hsa-miR-1827	0	0	1	1	1	1	KIAA1161	KIAA1161
hsa-miR-1827	1	0	1	1	1	1	SLC12A5	solute carrier family 12 (potassium/chloride transporter), member 5
hsa-miR-1827	0	0	1	0	1	1	ZNF490	zinc finger protein 490
hsa-miR-1827	0	0	1	1	1	1	SHROOM4	shroom family member 4
hsa-miR-1827	1	0	1	1	0	0	CASKIN2	CASK interacting protein 2
hsa-miR-1827	1	0	1	0	1	1	NUFIP2	nuclear fragile X mental retardation protein interacting protein 2
hsa-miR-1827	1	0	1	1	1	1	NLGN2	neuroligin 2
hsa-miR-1827	0	0	1	0	1	1	SYT13	synaptotagmin XIII
hsa-miR-1827	1	0	1	1	1	1	RANBP10	RAN binding protein 10
hsa-miR-1827	0	0	1	1	1	1	KLHL1	kelch-like 1 (Drosophila)
hsa-miR-1827	0	0	1	1	1	1	PRX	periaxin
hsa-miR-1827	1	0	1	1	1	1	ZNFX1	zinc finger, NFX1-type containing 1
hsa-miR-1827	1	0	1	1	1	1	NEFH	neurofilament, heavy polypeptide
hsa-miR-1827	1	0	1	0	1	1	NMT1	N-myristoyltransferase 1
hsa-miR-1827	0	0	1	1	0	0	TRIB3	tribbles homolog 3 (Drosophila)
hsa-miR-1827	0	0	1	0	1	1	MS4A7	membrane-spanning 4-domains, subfamily A, member 7
hsa-miR-1827	1	0	1	1	1	1	FAM60A	family with sequence similarity 60, member A
hsa-miR-1827	1	0	1	1	1	1	ZFYVE1	zinc finger, FYVE domain containing 1
hsa-miR-1827	0	0	1	1	1	1	CHST6	carbohydrate (N-acetylglucosamine 6-O) sulfotransferase 6
hsa-miR-1827	1	0	1	1	1	1	TRIB2	tribbles homolog 2 (Drosophila)
hsa-miR-1827	0	0	1	1	1	1	NR1D1	nuclear receptor subfamily 1, group D, member 1
hsa-miR-1827	0	0	1	1	0	0	C12orf44	chromosome 12 open reading frame 44
hsa-miR-1827	0	0	1	1	1	1	PGM5	phosphoglucomutase 5
hsa-miR-1827	1	0	1	1	1	1	FBXW4	F-box and WD repeat domain containing 4
hsa-miR-1827	1	0	1	0	1	1	CERS2	ceramide synthase 2
hsa-miR-1827	1	0	1	1	1	1	XYLT1	xylosyltransferase I
hsa-miR-1827	1	0	1	1	1	1	XYLT2	xylosyltransferase II
hsa-miR-1827	1	0	1	1	1	1	ABCG4	ATP-binding cassette, sub-family G (WHITE), member 4
hsa-miR-1827	0	0	1	1	1	1	TCTA	T-cell leukemia translocation altered
hsa-miR-1827	1	0	1	1	1	1	HIF3A	hypoxia inducible factor 3, alpha subunit
hsa-miR-1827	1	0	1	1	1	1	SUDS3	suppressor of defective silencing 3 homolog (S. cerevisiae)
hsa-miR-1827	0	0	1	1	0	0	GH2	growth hormone 2
hsa-miR-1827	0	0	1	1	0	0	GH1	growth hormone 1
hsa-miR-1827	1	0	1	1	1	1	GIGYF1	GRB10 interacting GYF protein 1
hsa-miR-1827	0	0	1	1	0	0	CSH2	chorionic somatomammotropin hormone 2
hsa-miR-1827	0	0	1	1	1	1	ACBD3	acyl-CoA binding domain containing 3
hsa-miR-1827	1	0	1	1	1	1	C16orf58	chromosome 16 open reading frame 58
hsa-miR-1827	1	0	1	1	1	1	FAM160B2	family with sequence similarity 160, member B2
hsa-miR-1827	1	0	1	1	1	1	C6orf106	chromosome 6 open reading frame 106
hsa-miR-1827	1	0	1	1	1	1	FBXL17	F-box and leucine-rich repeat protein 17
hsa-miR-1827	1	0	1	1	1	1	GRAMD3	GRAM domain containing 3
hsa-miR-1827	0	0	1	1	1	1	WDR77	WD repeat domain 77
hsa-miR-1827	1	0	1	1	1	1	FAM134A	family with sequence similarity 134, member A
hsa-miR-1827	1	0	1	1	0	0	PHF23	PHD finger protein 23
hsa-miR-1827	0	0	1	1	0	0	DHRS11	dehydrogenase/reductase (SDR family) member 11
hsa-miR-1827	1	0	1	1	1	1	NKAIN1	Na+/K+ transporting ATPase interacting 1
hsa-miR-1827	1	0	1	1	1	1	GCC1	GRIP and coiled-coil domain containing 1
hsa-miR-1827	1	0	1	1	1	1	C10orf76	chromosome 10 open reading frame 76
hsa-miR-1827	1	0	1	1	1	1	MUL1	mitochondrial E3 ubiquitin protein ligase 1
hsa-miR-1827	1	0	1	1	1	1	DHX40	DEAH (Asp-Glu-Ala-His) box polypeptide 40
hsa-miR-1827	1	0	1	1	1	1	C3orf52	chromosome 3 open reading frame 52
hsa-miR-1827	0	0	1	1	1	1	NSUN7	NOP2/Sun domain family, member 7
hsa-miR-1827	0	0	1	0	1	1	C1orf115	chromosome 1 open reading frame 115
hsa-miR-1827	0	0	1	1	0	0	RNF122	ring finger protein 122
hsa-miR-1827	1	0	1	1	0	0	CNTD2	cyclin N-terminal domain containing 2
hsa-miR-1827	1	0	1	1	0	0	SYNDIG1	synapse differentiation inducing 1
hsa-miR-1827	0	0	1	1	1	1	ZNF767	zinc finger family member 767
hsa-miR-1827	0	0	1	1	0	0	TMEM156	transmembrane protein 156
hsa-miR-1827	1	0	1	1	0	0	UBTD1	ubiquitin domain containing 1
hsa-miR-1827	0	0	1	1	0	0	NRSN2	neurensin 2
hsa-miR-1827	1	0	1	1	1	1	MCF2L	MCF.2 cell line derived transforming sequence-like
hsa-miR-1827	0	0	1	1	1	1	GFM1	G elongation factor, mitochondrial 1
hsa-miR-1827	1	0	1	1	1	1	ZC3H12A	zinc finger CCCH-type containing 12A
hsa-miR-1827	1	0	1	1	1	1	NAA50	N(alpha)-acetyltransferase 50, NatE catalytic subunit
hsa-miR-1827	1	0	1	0	1	1	DNAJC5	DnaJ (Hsp40) homolog, subfamily C, member 5
hsa-miR-1827	0	0	1	1	1	1	THUMPD2	THUMP domain containing 2
hsa-miR-1827	1	0	1	0	1	1	SETD7	SET domain containing (lysine methyltransferase) 7
hsa-miR-1827	0	0	1	1	1	1	BCL2L14	BCL2-like 14 (apoptosis facilitator)
hsa-miR-1827	1	0	1	1	1	1	SGPP1	sphingosine-1-phosphate phosphatase 1
hsa-miR-1827	1	0	1	0	1	1	C1orf21	chromosome 1 open reading frame 21
hsa-miR-1827	1	0	1	0	1	1	CSRNP2	cysteine-serine-rich nuclear protein 2
hsa-miR-1827	1	0	1	1	0	0	PVRL4	poliovirus receptor-related 4
hsa-miR-1827	1	0	1	1	1	1	RAB1B	RAB1B, member RAS oncogene family
hsa-miR-1827	0	0	1	1	1	1	L3MBTL2	l(3)mbt-like 2 (Drosophila)
hsa-miR-1827	1	0	1	1	1	1	PCDHA9	protocadherin alpha 9
hsa-miR-1827	0	0	1	0	1	1	ENAM	enamelin
hsa-miR-1827	0	0	1	1	0	0	CACNG6	calcium channel, voltage-dependent, gamma subunit 6
hsa-miR-1827	0	0	1	1	1	1	FRMD8	FERM domain containing 8
hsa-miR-1827	1	0	1	1	1	1	CDCA7	cell division cycle associated 7
hsa-miR-1827	1	0	1	1	1	1	FBXO30	F-box protein 30
hsa-miR-1827	1	0	1	1	1	1	ANTXR1	anthrax toxin receptor 1
hsa-miR-1827	0	0	1	0	1	1	LDOC1L	leucine zipper, down-regulated in cancer 1-like
hsa-miR-1827	1	0	1	0	1	1	PSD2	pleckstrin and Sec7 domain containing 2
hsa-miR-1827	0	0	1	0	1	1	TMEM246	transmembrane protein 246
hsa-miR-1827	1	0	1	1	1	1	BAZ1B	bromodomain adjacent to zinc finger domain, 1B
hsa-miR-1827	1	0	1	1	1	1	PCDH7	protocadherin 7
hsa-miR-1827	1	0	1	1	1	1	DCTN5	dynactin 5 (p25)
hsa-miR-1827	0	0	1	1	1	1	MAP1LC3A	microtubule-associated protein 1 light chain 3 alpha
hsa-miR-1827	1	0	1	1	1	1	TTBK1	tau tubulin kinase 1
hsa-miR-1827	0	0	1	1	0	0	KIF2B	kinesin family member 2B
hsa-miR-1827	1	0	1	1	1	1	TTYH2	tweety homolog 2 (Drosophila)
hsa-miR-1827	1	0	1	1	0	0	ATOH8	atonal homolog 8 (Drosophila)
hsa-miR-1827	1	0	1	0	1	1	PPP1R15B	protein phosphatase 1, regulatory subunit 15B
hsa-miR-1827	1	0	1	0	1	1	UBASH3B	ubiquitin associated and SH3 domain containing B
hsa-miR-1827	0	0	1	1	1	1	POLR2J2	polymerase (RNA) II (DNA directed) polypeptide J2
hsa-miR-1827	1	0	1	1	1	1	TRIM5	tripartite motif containing 5
hsa-miR-1827	1	0	1	1	0	0	DMRTB1	DMRT-like family B with proline-rich C-terminal, 1
hsa-miR-1827	1	0	1	0	1	1	PURB	purine-rich element binding protein B
hsa-miR-1827	1	0	1	1	1	1	SSH2	slingshot homolog 2 (Drosophila)
hsa-miR-1827	0	0	1	0	1	1	C9orf123	chromosome 9 open reading frame 123
hsa-miR-1827	1	0	1	1	1	1	EPT1	ethanolaminephosphotransferase 1 (CDP-ethanolamine-specific)
hsa-miR-1827	0	0	1	1	0	0	SLC38A5	solute carrier family 38, member 5
hsa-miR-1827	0	0	1	1	0	0	GUCA2A	guanylate cyclase activator 2A (guanylin)
hsa-miR-1827	1	0	1	1	0	0	CCDC120	coiled-coil domain containing 120
hsa-miR-1827	1	0	1	1	1	1	LUZP1	leucine zipper protein 1
hsa-miR-1827	1	0	1	1	1	1	BRWD1	bromodomain and WD repeat domain containing 1
hsa-miR-1827	0	0	1	1	0	0	SIGLEC11	sialic acid binding Ig-like lectin 11
hsa-miR-1827	1	0	1	1	1	1	XKR4	XK, Kell blood group complex subunit-related family, member 4
hsa-miR-1827	1	0	1	1	1	1	ELFN2	extracellular leucine-rich repeat and fibronectin type III domain containing 2
hsa-miR-1827	1	0	1	0	1	1	FAM129A	family with sequence similarity 129, member A
hsa-miR-1827	1	0	1	1	1	1	TRIM9	tripartite motif containing 9
hsa-miR-1827	1	0	1	0	1	1	EDARADD	EDAR-associated death domain
hsa-miR-1827	0	0	1	1	0	0	ZSWIM3	zinc finger, SWIM-type containing 3
hsa-miR-1827	1	0	1	1	1	1	SPSB4	splA/ryanodine receptor domain and SOCS box containing 4
hsa-miR-1827	1	0	1	0	1	1	SOCS4	suppressor of cytokine signaling 4
hsa-miR-1827	1	0	1	1	1	1	BMPER	BMP binding endothelial regulator
hsa-miR-1827	0	0	1	1	1	1	ZNF431	zinc finger protein 431
hsa-miR-1827	0	0	1	0	1	1	SYNPO2	synaptopodin 2
hsa-miR-1827	1	0	1	1	1	1	FAM122A	family with sequence similarity 122A
hsa-miR-1827	1	0	1	1	0	0	PKDCC	protein kinase domain containing, cytoplasmic homolog (mouse)
hsa-miR-1827	0	0	1	0	1	1	SP140L	SP140 nuclear body protein-like
hsa-miR-1827	0	0	1	1	1	1	MRAP2	melanocortin 2 receptor accessory protein 2
hsa-miR-1827	1	0	1	1	1	1	KCTD12	potassium channel tetramerisation domain containing 12
hsa-miR-1827	1	0	1	0	1	1	SP1	Sp1 transcription factor
hsa-miR-1827	0	0	1	1	1	1	C1orf213	chromosome 1 open reading frame 213
hsa-miR-1827	1	0	1	0	1	1	FCHO2	FCH domain only 2
hsa-miR-1827	1	0	1	1	0	0	LIPH	lipase, member H
hsa-miR-1827	1	0	1	1	1	1	MAPK1IP1L	mitogen-activated protein kinase 1 interacting protein 1-like
hsa-miR-1827	1	0	1	1	1	1	ZMAT2	zinc finger, matrin-type 2
hsa-miR-1827	0	0	1	1	1	1	VWA3B	von Willebrand factor A domain containing 3B
hsa-miR-1827	0	0	1	1	0	0	PRKCDBP	protein kinase C, delta binding protein
hsa-miR-1827	0	0	1	1	1	1	TMEM106A	transmembrane protein 106A
hsa-miR-1827	1	0	1	1	1	1	FAM84A	family with sequence similarity 84, member A
hsa-miR-1827	0	0	1	1	1	1	FAM100A	family with sequence similarity 100, member A
hsa-miR-1827	0	0	1	0	1	1	SPATA18	spermatogenesis associated 18
hsa-miR-1827	0	0	1	1	1	1	APOBEC3F	apolipoprotein B mRNA editing enzyme, catalytic polypeptide-like 3F
hsa-miR-1827	0	0	1	1	1	1	SLC15A4	solute carrier family 15, member 4
hsa-miR-1827	1	0	1	0	1	1	MTPN	myotrophin
hsa-miR-1827	0	0	1	1	1	1	LONRF1	LON peptidase N-terminal domain and ring finger 1
hsa-miR-1827	1	0	1	0	1	1	SYT11	synaptotagmin XI
hsa-miR-1827	1	0	1	1	1	1	TBX15	T-box 15
hsa-miR-1827	1	0	1	1	1	1	TMEM178A	transmembrane protein 178A
hsa-miR-1827	1	0	1	1	1	1	ZSCAN29	zinc finger and SCAN domain containing 29
hsa-miR-1827	0	0	1	0	1	1	HORMAD2	HORMA domain containing 2
hsa-miR-1827	0	0	1	1	0	0	FAM81B	family with sequence similarity 81, member B
hsa-miR-1827	0	0	1	1	0	0	WBSCR27	Williams Beuren syndrome chromosome region 27
hsa-miR-1827	1	0	1	0	1	1	MOSPD2	motile sperm domain containing 2
hsa-miR-1827	0	0	1	1	0	0	FAM47B	family with sequence similarity 47, member B
hsa-miR-1827	0	0	1	1	1	1	DAND5	DAN domain family, member 5
hsa-miR-1827	1	0	1	0	1	1	TMEM154	transmembrane protein 154
hsa-miR-1827	0	0	1	1	1	1	GAPT	GRB2-binding adaptor protein, transmembrane
hsa-miR-1827	1	0	1	1	1	1	ZCCHC5	zinc finger, CCHC domain containing 5
hsa-miR-1827	0	0	1	1	0	0	DOK6	docking protein 6
hsa-miR-1827	1	0	1	1	1	1	PDIK1L	PDLIM1 interacting kinase 1 like
hsa-miR-1827	0	0	1	1	1	1	MS4A6A	membrane-spanning 4-domains, subfamily A, member 6A
hsa-miR-1827	1	0	1	1	1	1	UHRF2	ubiquitin-like with PHD and ring finger domains 2, E3 ubiquitin protein ligase
hsa-miR-1827	0	0	1	1	0	0	POMZP3	POM121 and ZP3 fusion
hsa-miR-1827	1	0	1	1	1	1	C3orf45	chromosome 3 open reading frame 45
hsa-miR-1827	1	0	1	1	1	1	TMEM151A	transmembrane protein 151A
hsa-miR-1827	0	0	1	1	0	0	SCARF2	scavenger receptor class F, member 2
hsa-miR-1827	1	0	1	1	1	1	FNDC5	fibronectin type III domain containing 5
hsa-miR-1827	1	0	1	1	1	1	POM121	POM121 transmembrane nucleoporin
hsa-miR-1827	0	0	1	1	1	1	TAPBP	TAP binding protein (tapasin)
hsa-miR-1827	0	0	1	0	1	1	TUSC5	tumor suppressor candidate 5
hsa-miR-1827	0	0	1	1	0	0	DEFB119	defensin, beta 119
hsa-miR-1827	1	0	1	1	1	1	MMGT1	membrane magnesium transporter 1
hsa-miR-1827	0	0	1	1	1	1	KLF17	Kruppel-like factor 17
hsa-miR-1827	1	0	1	1	1	1	FAM117B	family with sequence similarity 117, member B
hsa-miR-1827	1	0	1	0	1	1	GABRG1	gamma-aminobutyric acid (GABA) A receptor, gamma 1
hsa-miR-1827	0	0	1	1	1	1	OTOGL	otogelin-like
hsa-miR-1827	1	0	1	1	1	1	RIMKLA	ribosomal modification protein rimK-like family member A
hsa-miR-1827	1	0	1	1	1	1	ARL10	ADP-ribosylation factor-like 10
hsa-miR-1827	1	0	1	1	1	1	ATG9B	autophagy related 9B
hsa-miR-1827	1	0	1	0	1	1	SREK1IP1	SREK1-interacting protein 1
hsa-miR-1827	0	0	1	1	1	1	SCARA5	scavenger receptor class A, member 5 (putative)
hsa-miR-1827	1	0	1	0	1	1	FAM84B	family with sequence similarity 84, member B
hsa-miR-1827	1	0	1	1	1	1	UBR1	ubiquitin protein ligase E3 component n-recognin 1
hsa-miR-1827	0	0	1	1	1	1	ZDHHC22	zinc finger, DHHC-type containing 22
hsa-miR-1827	1	0	1	1	1	1	SYT9	synaptotagmin IX
hsa-miR-1827	0	0	1	1	1	1	KRTAP8-1	keratin associated protein 8-1
hsa-miR-1827	1	0	1	0	1	1	CCDC71L	coiled-coil domain containing 71-like
hsa-miR-1827	0	0	1	1	1	1	S100A7A	S100 calcium binding protein A7A
hsa-miR-1827	1	0	1	1	1	1	PPAP2B	phosphatidic acid phosphatase type 2B
hsa-miR-1827	0	0	1	1	1	1	LYNX1	Ly6/neurotoxin 1
hsa-miR-1827	1	0	1	1	1	1	FAM134C	family with sequence similarity 134, member C
hsa-miR-1827	1	0	1	0	1	1	IQGAP3	IQ motif containing GTPase activating protein 3
hsa-miR-1827	0	0	1	1	1	1	MRPL52	mitochondrial ribosomal protein L52
hsa-miR-1827	0	0	1	1	1	1	ZNF831	zinc finger protein 831
hsa-miR-1827	1	0	1	1	1	1	DCAF12L1	DDB1 and CUL4 associated factor 12-like 1
hsa-miR-1827	1	0	1	1	1	1	MB21D2	Mab-21 domain containing 2
hsa-miR-1827	1	0	1	1	0	0	PHOSPHO1	phosphatase, orphan 1
hsa-miR-1827	0	0	1	1	0	0	C2orf53	chromosome 2 open reading frame 53
hsa-miR-1827	1	0	1	1	0	0	KY	kyphoscoliosis peptidase
hsa-miR-1827	1	0	1	1	1	1	MTDH	metadherin
hsa-miR-1827	0	0	1	1	0	0	AGPAT6	1-acylglycerol-3-phosphate O-acyltransferase 6 (lysophosphatidic acid acyltransferase, zeta)
hsa-miR-1827	0	0	1	1	0	0	C7orf34	chromosome 7 open reading frame 34
hsa-miR-1827	0	0	1	1	1	1	MED22	mediator complex subunit 22
hsa-miR-1827	0	0	1	1	1	1	WFDC8	WAP four-disulfide core domain 8
hsa-miR-1827	1	0	1	1	1	1	ERAS	ES cell expressed Ras
hsa-miR-1827	1	0	1	1	1	1	AKT3	v-akt murine thymoma viral oncogene homolog 3 (protein kinase B, gamma)
hsa-miR-1827	0	0	1	1	0	0	CENPV	centromere protein V
hsa-miR-1827	0	0	1	0	1	1	SPATA12	spermatogenesis associated 12
hsa-miR-1827	1	0	1	1	1	1	NF2	neurofibromin 2 (merlin)
hsa-miR-1827	0	0	1	1	0	0	NUDT8	nudix (nucleoside diphosphate linked moiety X)-type motif 8
hsa-miR-1827	0	0	1	1	1	1	USP12	ubiquitin specific peptidase 12
hsa-miR-1827	1	0	1	1	1	1	BCL9L	B-cell CLL/lymphoma 9-like
hsa-miR-1827	1	0	1	0	1	1	C12orf36	chromosome 12 open reading frame 36
hsa-miR-1827	0	0	1	1	1	1	C15orf38	chromosome 15 open reading frame 38
hsa-miR-1827	0	0	1	1	0	0	GPX6	glutathione peroxidase 6 (olfactory)
hsa-miR-1827	1	0	1	0	1	1	RNF144B	ring finger protein 144B
hsa-miR-1827	1	0	1	0	1	1	RIMS4	regulating synaptic membrane exocytosis 4
hsa-miR-1827	1	0	1	1	1	1	ZBTB41	zinc finger and BTB domain containing 41
hsa-miR-1827	0	0	1	0	1	1	BTNL3	butyrophilin-like 3
hsa-miR-1827	1	0	1	1	1	1	CPXM2	carboxypeptidase X (M14 family), member 2
hsa-miR-1827	1	0	1	1	1	1	GPRIN3	GPRIN family member 3
hsa-miR-1827	0	0	1	1	0	0	TMEM173	transmembrane protein 173
hsa-miR-1827	0	0	1	1	0	0	MORN5	MORN repeat containing 5
hsa-miR-1827	0	0	1	1	0	0	FAM89A	family with sequence similarity 89, member A
hsa-miR-1827	0	0	1	1	1	1	LHFPL4	lipoma HMGIC fusion partner-like 4
hsa-miR-1827	1	0	1	0	1	1	ZC3H6	zinc finger CCCH-type containing 6
hsa-miR-1827	0	0	1	1	1	1	COL25A1	collagen, type XXV, alpha 1
hsa-miR-1827	0	0	1	1	0	0	TGM6	transglutaminase 6
hsa-miR-1827	0	0	1	1	1	1	TMEM189	transmembrane protein 189
hsa-miR-1827	0	0	1	1	0	0	C6orf108	chromosome 6 open reading frame 108
hsa-miR-1827	1	0	1	1	1	1	BLOC1S5	biogenesis of lysosomal organelles complex-1, subunit 5, muted
hsa-miR-1827	1	0	1	1	0	0	KAZN	kazrin, periplakin interacting protein
hsa-miR-1827	1	0	1	1	1	1	E2F7	E2F transcription factor 7
hsa-miR-1827	0	0	1	1	0	0	LRRN4CL	LRRN4 C-terminal like
hsa-miR-1827	0	0	1	1	1	1	SERTM1	serine-rich and transmembrane domain containing 1
hsa-miR-1827	1	0	1	1	1	1	IGSF1	immunoglobulin superfamily, member 1
hsa-miR-1827	1	0	1	0	1	1	NAALADL2	N-acetylated alpha-linked acidic dipeptidase-like 2
hsa-miR-1827	0	0	1	1	1	1	C10orf129	chromosome 10 open reading frame 129
hsa-miR-1827	1	0	1	1	1	1	FAM43B	family with sequence similarity 43, member B
hsa-miR-1827	1	0	1	1	0	0	TSEN54	tRNA splicing endonuclease 54 homolog (S. cerevisiae)
hsa-miR-1827	1	0	1	1	1	1	SKIDA1	SKI/DACH domain containing 1
hsa-miR-1827	1	0	1	1	1	1	TNFAIP8L3	tumor necrosis factor, alpha-induced protein 8-like 3
hsa-miR-1827	0	0	1	0	1	1	CLEC17A	C-type lectin domain family 17, member A
hsa-miR-1827	0	0	1	1	0	0	KRTDAP	keratinocyte differentiation-associated protein
hsa-miR-1827	1	0	1	1	0	0	CD164L2	CD164 sialomucin-like 2
hsa-miR-1827	1	0	1	1	1	1	CAPN3	calpain 3, (p94)
hsa-miR-1827	0	0	1	1	1	1	LYSMD1	LysM, putative peptidoglycan-binding, domain containing 1
hsa-miR-1827	0	0	1	0	1	1	ASB18	ankyrin repeat and SOCS box containing 18
hsa-miR-1827	0	0	1	1	0	0	AMTN	amelotin
hsa-miR-1827	0	0	1	0	0	0	ESRRAP2	estrogen-related receptor alpha pseudogene 2
hsa-miR-1827	0	0	1	0	0	0	LYPLA2P1	lysophospholipase II pseudogene 1
hsa-miR-1827	0	0	1	0	0	0	TTTY2	testis-specific transcript, Y-linked 2 (non-protein coding)
hsa-miR-1827	0	0	1	0	0	0	TTTY19	testis-specific transcript, Y-linked 19 (non-protein coding)
hsa-miR-1827	0	0	1	0	0	0	FAM224B	family with sequence similarity 224, member B (non-protein coding)
hsa-miR-1827	0	0	1	0	0	0	SLC25A3P1	solute carrier family 25 (mitochondrial carrier; phosphate carrier), member 3 pseudogene 1
hsa-miR-1827	0	0	1	0	0	0	DEFB122	defensin, beta 122 (pseudogene)
hsa-miR-1827	0	0	1	0	0	0	TOP1P1	topoisomerase (DNA) I pseudogene 1
hsa-miR-1827	0	0	1	0	0	0	DGCR5	DiGeorge syndrome critical region gene 5 (non-protein coding)
hsa-miR-1827	0	0	1	0	0	0	PER4	period homolog 3 (Drosophila) pseudogene
hsa-miR-1827	0	0	1	0	0	0	HOXA11-AS	HOXA11 antisense RNA
hsa-miR-1827	0	0	1	0	0	0	PRR24	proline rich 24
hsa-miR-1827	0	0	1	0	0	0	TPTE2P6	transmembrane phosphoinositide 3-phosphatase and tensin homolog 2 pseudogene 6
hsa-miR-1827	0	0	1	0	0	0	AQP7P1	aquaporin 7 pseudogene 1
hsa-miR-1827	0	0	1	0	0	0	SIGLEC16	sialic acid binding Ig-like lectin 16 (gene/pseudogene)
hsa-miR-1827	0	0	1	0	0	0	DUSP5P	dual specificity phosphatase 5 pseudogene
hsa-miR-1827	0	0	1	0	0	0	HAS2-AS1	HAS2 antisense RNA 1
hsa-miR-1827	0	0	1	0	0	0	SCARNA6	small Cajal body-specific RNA 6
hsa-miR-1827	0	0	1	0	0	0	PYY2	peptide YY, 2 (pseudogene)
hsa-miR-1827	0	0	1	0	0	0	LOC284441	actin-related protein 2 pseudogene
hsa-miR-1827	0	0	1	0	0	0	HSP90B3P	heat shock protein 90kDa beta (Grp94), member 3, pseudogene
hsa-miR-1827	0	0	1	0	0	0	SNORD116-4	small nucleolar RNA, C/D box 116-4
hsa-miR-1827	0	0	1	1	0	0	PHKG2	phosphorylase kinase, gamma 2 (testis)
hsa-miR-1827	0	0	1	1	0	0	GLP1R	glucagon-like peptide 1 receptor
hsa-miR-1827	1	0	1	1	0	0	KIAA1549L	KIAA1549-like
hsa-miR-1827	1	0	1	1	1	1	CASP2	caspase 2, apoptosis-related cysteine peptidase
hsa-miR-1827	1	0	1	1	1	1	TRIO	trio Rho guanine nucleotide exchange factor
hsa-miR-1827	1	0	1	1	0	0	TNXB	tenascin XB
hsa-miR-1827	1	0	1	1	1	1	ATF6B	activating transcription factor 6 beta
hsa-miR-1827	0	0	1	1	0	0	BMP1	bone morphogenetic protein 1
hsa-miR-1827	0	0	1	1	0	0	GPR17	G protein-coupled receptor 17
